# Supplementary material for: Desymmetrization of cyclohexadienones via cinchonine derived thiourea-catalyzed enantioselective aza-Michael reaction and total synthesis of (-)-Mesembrine
Source: Royal Society of Chemistry journal article supplement (doi:10.1039/c1sc00083g), 2011-01-01
Supplement: c1sc00083g.pdf [file c1sc00083g.pdf]

## Supporting Information

For

Desymmetrization of Cyclohexadienones via Cinchonine Derived Thiourea-Catalyzed  
Enantioselective Aza-Michael Reaction and Total Synthesis of (-)-Mesembrine

Qing Gu and Shu-Li You\*

*State Key Laboratory of Organometallic Chemistry, Shanghai Institute of Organic Chemistry,  
Chinese Academy of Sciences, 345 Lingling Lu, Shanghai 200032, China, Fax: (+86)  
21-5492-5087, E-mail: slyou@sioc.ac.cn*

## Table of Contents

|                                                                 |          |
|-----------------------------------------------------------------|----------|
| 1 General Methods                                               | S2       |
| 2 Experimental Sections                                         |          |
| 2.1 Screening the reaction conditions                           | S2-S3    |
| 2.2 Preparation of substrates <b>3a-k</b>                       | S4-S12   |
| 2.3 General procedure for preparation of substrates <b>6a-k</b> | S12-S17  |
| 2.4 General procedure for asymmetric aza-Michael reaction       | S17-S26  |
| 3 Derivatization of the aza-Michael adducts                     | S27-S29  |
| 4 Total synthesis of (-)-Mesembrine                             | S29-S31  |
| 5 X-Ray data of compound <b>9</b>                               | S32-S34  |
| 6 NMR Spectra and HPLC chromatograms                            | S35-S165 |

**1 General Methods.** Unless stated otherwise, all reactions were carried out in flame-dried glassware under a dry argon atmosphere. All solvents were purified and dried according to standard methods prior to use.  $^1\text{H}$  and  $^{13}\text{C}$  NMR spectra were recorded on a Varian instrument (300 MHz and 75 MHz, 400 MHz and 100 MHz, respectively) and internally referenced to tetramethylsilane signal or residual protio solvent signals.  $^{19}\text{F}$  NMR chemical shifts were determined relative to  $\text{CFCl}_3$  at  $\delta$  0.0. Data for  $^1\text{H}$  NMR are recorded as follows: chemical shift ( $\delta$ , ppm), multiplicity (s = singlet, d = doublet, t = triplet, m = multiplet or unresolved, br = broad singlet, coupling constant(s) in Hz, integration). Data for  $^{13}\text{C}$  NMR are reported in terms of chemical shift ( $\delta$ , ppm).

Alkaloid derived-thioureas **1a-h**<sup>[1]</sup>, compounds **8a-l**<sup>[2]</sup>, **11**<sup>[6]</sup> and allyl tosylcarbamate<sup>[7]</sup> were prepared according to the literatures.

## 2 Experimental Sections:

### 2.1 Screening the reaction conditions

**Table 1** Screening of solvents<sup>a</sup>

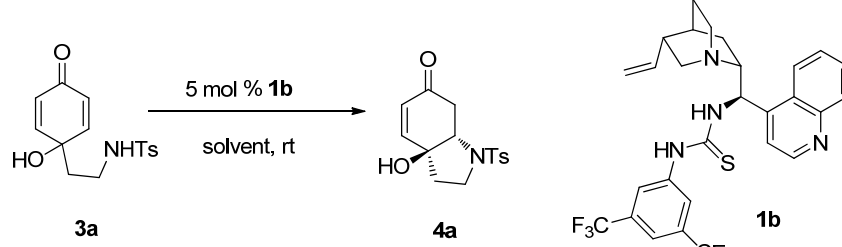

| Entry    | solvent                             | time (h)  | yield (%) <sup>b</sup> | ee (%) <sup>c</sup> |
|----------|-------------------------------------|-----------|------------------------|---------------------|
| <b>1</b> | <b>CH<sub>2</sub>Cl<sub>2</sub></b> | <b>12</b> | <b>94</b>              | <b>97</b>           |
| 2        | CHCl <sub>3</sub>                   | 8         | 95                     | 88                  |
| 3        | DCE                                 | 12        | 91                     | 96                  |
| 4        | CCl <sub>4</sub>                    | 24        | 82                     | 90                  |
| 5        | toluene                             | 9         | 92                     | 95                  |
| 6        | benzene                             | 10        | 96                     | 96                  |
| 7        | THF                                 | 24        | 36                     | 92                  |
| 8        | ether                               | 10        | 91                     | 86                  |
| 9        | CH <sub>3</sub> CN                  | 24        | 71                     | 88                  |

<sup>a</sup> Reaction conditions: 5 mol % of **1b**, 0.1 mol/L **3a** in solvent at room temperature. <sup>b</sup> Isolated yields. <sup>c</sup> Determined by chiral HPLC analysis (chiralpak AD-H).

**Table 2** Investigation of the reaction temperature, concentration and catalyst loadings<sup>a</sup>

| Entry    | Conc.<br>(X mol/L) | catalyst<br>(Y mol%) | T (°C)    | time (h)  | yield (%) <sup>b</sup> | ee (%) <sup>c</sup> |
|----------|--------------------|----------------------|-----------|-----------|------------------------|---------------------|
| <b>1</b> | <b>0.1</b>         | <b>5</b>             | <b>rt</b> | <b>12</b> | <b>94</b>              | <b>96.8</b>         |
| 2        | 0.2                | 5                    | rt        | 12        | 96                     | 95.8                |
| 3        | 1.0                | 5                    | rt        | 4         | 96                     | 95.1                |
| 4        | 0.05               | 5                    | rt        | 24        | 95                     | 97.1                |
| 5        | 0.1                | 10                   | rt        | 5         | 97                     | 97.1                |
| 6        | 0.1                | 5                    | -15       | 38        | 92                     | 96.5                |

<sup>a</sup> Reaction conditions: X mol/L **3a**, Y mol % of **1b** in CH<sub>2</sub>Cl<sub>2</sub>. <sup>b</sup> Isolated yields. <sup>c</sup> Determined by chiral HPLC analysis (chiralpak AD-H).

**Table 3** Further optimization of the reaction conditions for **6a**<sup>a</sup>

| Entry    | catalyst<br>(X mol%) | Conc.<br>(Y mol/L) | time (h)  | T (°C)    | yield (%) <sup>b</sup> | ee (%) <sup>c</sup> |
|----------|----------------------|--------------------|-----------|-----------|------------------------|---------------------|
| 1        | 5                    | 0.1                | 72        | rt        | 11                     | 98.3                |
| 2        | 5                    | 0.1                | 48        | 40        | 22                     | 97.7                |
| 3        | 5                    | 0.5                | 48        | rt        | 13                     | 97.7                |
| 4        | 20                   | 0.1                | 72        | rt        | 45                     | 97.0                |
| 5        | 20                   | 0.5                | 144       | rt        | 58                     | 97.7                |
| <b>6</b> | <b>20</b>            | <b>0.5</b>         | <b>72</b> | <b>40</b> | <b>82</b>              | <b>96.7</b>         |

<sup>a</sup> Reaction conditions: X mol % of **1b**, Y mol/L **6a** in CH<sub>2</sub>Cl<sub>2</sub>. <sup>b</sup> Isolated yields. <sup>c</sup> Determined by chiral HPLC analysis (Chiralpak AD-H).

## 2.2 Preparation of substrates 3a-k.

### Synthesis of substrates 3a-c.

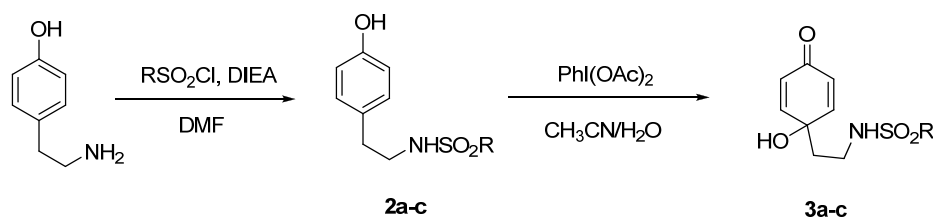

To a solution of tyramine (685 mg, 5 mmol) and corresponding sulfonyl chloride (6 mmol) in DMF (10 mL) was added DIEA (2.6 mL, 15 mmol) dropwise at 0 °C. The reaction mixture was stirred for 2 h and diluted with H<sub>2</sub>O, extracted with ethyl acetate for three times. The combined organic layers were washed with brine, dried over anhydrous Na<sub>2</sub>SO<sub>4</sub> and filtered. The solvent was removed under reduced pressure and the residue was purified by silica gel column chromatography to afford **2**.

To a solution of **2** (1.0 mmol) in CH<sub>3</sub>CN/H<sub>2</sub>O (5 mL, 4:1) was slowly added PhI(OAc)<sub>2</sub> (425 mg, 1.2 mmol) at 0 °C. The reaction mixture was stirred for 1h, then dried over anhydrous Na<sub>2</sub>SO<sub>4</sub> and filtered. The solvent was removed under reduced pressure and the residue was purified by silica gel column chromatography to afford **3**.

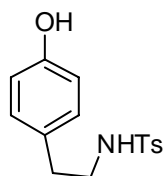

**N-(4-Hydroxyphenethyl)-4-methylbenzenesulfonamide (2a)**<sup>[4]</sup>

46% yield, white solid. Mp = 171.8-172.5 °C; <sup>1</sup>H NMR (300 MHz, CD<sub>3</sub>OD) δ 2.40 (s, 3H), 2.58 (t, *J* = 7.5 Hz, 2H), 2.97 (t, *J* = 7.5 Hz, 2H), 6.64 (d, *J* = 8.1 Hz, 2H), 6.89 (d, *J* = 8.1 Hz, 2H), 7.32 (d, *J* = 7.8 Hz, 2H), 7.65 (d, *J* = 7.8 Hz, 2H).

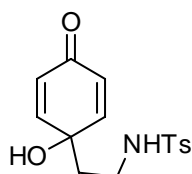

**N-(2-(1-Hydroxy-4-oxocyclohexa-2,5-dienyl)ethyl)-4-methylbenzenesulfonamide (3a)**

51% yield, pale yellow solid. Mp = 102.1-103.3 °C; <sup>1</sup>H NMR (300 MHz, CDCl<sub>3</sub>) δ 1.91 (t, *J* = 6.6 Hz, 2H), 2.43 (s, 3H), 3.03-3.09 (m, 2H), 3.26 (br, 1H), 5.40 (t, *J* = 6.0 Hz, 1H), 6.10 (d, *J* = 9.9 Hz, 2H), 6.82 (d, *J* = 9.9 Hz, 2H), 7.31 (d, *J* = 8.1 Hz, 2H), 7.71 (d, *J* = 8.1 Hz, 2H); <sup>13</sup>C NMR (75 MHz, CDCl<sub>3</sub>) δ 21.5, 38.8, 39.0, 68.9, 127.0, 128.0, 129.8, 136.2, 143.7, 150.5, 185.5; IR (film) 3331, 3281, 1662, 1618, 1307, 1151, 1089, 1016, 903, 858, 814, 662 cm<sup>-1</sup>; HRMS (EI): Exact mass calcd for C<sub>15</sub>H<sub>17</sub>NO<sub>4</sub>S: 307.0878. Found:

307.0881.

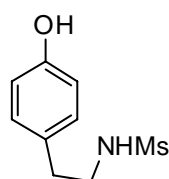

**N-(4-Hydroxyphenethyl)methanesulfonamide (2b)**

41% yield, yellow solid. Mp = 100.7-101.5°C;  $^1\text{H}$  NMR (300 MHz,  $\text{CD}_3\text{OD}$ )  $\delta$

2.73 (t,  $J$  = 7.2 Hz, 2H), 2.80 (s, 3H), 3.25 (t,  $J$  = 7.2 Hz, 2H), 6.72 (d,  $J$  = 8.1

Hz, 2H), 7.06 (d,  $J$  = 8.1 Hz, 2H).  $^{13}\text{C}$  NMR (75 MHz,  $\text{CD}_3\text{OD}$ )  $\delta$  36.8, 39.9,

46.0, 116.3, 130.9, 131.0, 157.0; IR (film) 3324, 2924, 2853, 1610, 1588, 1513, 1461, 1425, 1402,

1336, 1308, 1284, 1199, 1129, 1064, 976, 883, 830, 770, 739  $\text{cm}^{-1}$ ; HRMS (MALDI): Exact mass

calcd for  $\text{C}_9\text{H}_{13}\text{NO}_3\text{SNa}$ : 238.0508. Found: 238.0510.

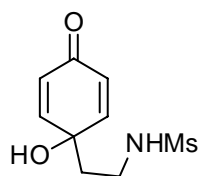

**N-(2-(1-Hydroxy-4-oxocyclohexa-2,5-dienyl)ethyl)methanesulfonamide (3b)**

50% yield, yellow solid. Mp = 108.6- 109.9°C;  $^1\text{H}$  NMR (300 MHz,  $\text{CD}_3\text{OD}$ )

$\delta$  2.01 (t,  $J$  = 7.5 Hz, 2H), 2.94 (s, 3H), 3.15 (t,  $J$  = 7.5 Hz, 2H), 6.19 (d,  $J$  =

9.3 Hz, 2H), 7.01 (d,  $J$  = 9.3 Hz, 2H);  $^{13}\text{C}$  NMR (75 MHz,  $\text{CD}_3\text{OD}$ )  $\delta$  39.3, 39.7, 41.4, 69.2, 128.5,

153.8, 187.6; IR (film) 3450, 3287, 1665, 1624, 1445, 1293, 1141, 1079, 1008, 863, 756  $\text{cm}^{-1}$ ;

HRMS (EI): Exact mass calcd for  $\text{C}_9\text{H}_{13}\text{NO}_4\text{S}$ : 231.0565. Found: 231.0567.

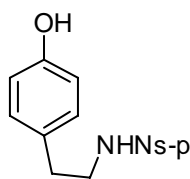

**N-(4-Hydroxyphenethyl)-4-nitrobenzenesulfonamide (2c)<sup>[4]</sup>**

52% yield, yellow solid. Mp = 143.6- 144.8°C;  $^1\text{H}$  NMR (300 MHz,  $\text{CD}_3\text{OD}$ )  $\delta$

2.62 (t,  $J$  = 7.2 Hz, 2H), 3.12 (t,  $J$  = 7.2 Hz, 2H), 6.59 (d,  $J$  = 8.4 Hz, 2H),

6.89 (d,  $J$  = 8.4 Hz, 2H), 7.93 (d,  $J$  = 8.7 Hz, 2H), 8.31 (d,  $J$  = 8.7 Hz, 2H).

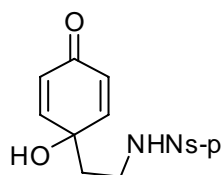

**N-(2-(1-Hydroxy-4-oxocyclohexa-2,5-dienyl)ethyl)-4-nitrobenzenesulfonamide (3c)**

46% yield, yellow solid. Mp = 143.6-144.8°C;  $^1\text{H}$  NMR (400 MHz,  $\text{CD}_3\text{OD}$ )

$\delta$  1.92 (t,  $J$  = 7.6 Hz, 2H), 3.00 (t,  $J$  = 7.6 Hz, 2H), 6.14 (d,  $J$  = 10.0 Hz, 2H),

6.92 (d,  $J$  = 10.0 Hz, 2H), 8.08 (d,  $J$  = 8.8 Hz, 2H), 8.43 (d,  $J$  = 8.8 Hz, 2H);  $^{13}\text{C}$  NMR (100 MHz,

$\text{CD}_3\text{OD}$ )  $\delta$  39.4, 40.9, 69.1, 125.5, 128.5, 129.4, 147.6, 151.5, 153.5, 187.4; IR (film) 3425, 3203,

1670, 1631, 1530, 1352, 1335, 1308, 1279, 1159, 1093, 1004, 869, 852, 747, 716  $\text{cm}^{-1}$ ; HRMS

(EI): Exact mass calcd for C<sub>14</sub>H<sub>14</sub>N<sub>2</sub>O<sub>6</sub>S: 338.0573. Found: 338.0572.

***tert*-Butyl 2-(1-hydroxy-4-oxocyclohexa-2,5-dienyl)ethylcarbamate (**3d**)**

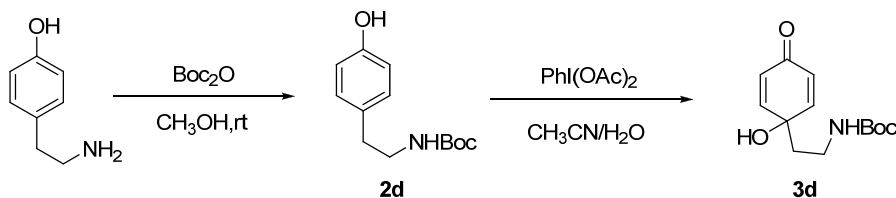

To a solution of tyramine (4.11 g, 3 mmol) in methanol (50 mL) was added di-*tert*-butyl dicarbonate (7.4 g, 3.4 mmol) slowly and the reaction mixture was stirred at room temperature overnight. The solvent was evaporated, and the residue was diluted with ethyl acetate and washed with water. The organic layer was dried over anhydrous Na<sub>2</sub>SO<sub>4</sub> and filtered; the solvent was removed under reduced pressure. The residue was purified by silica gel column chromatography (PE : EtOAc = 2:1) to afford **2d**.<sup>[3]</sup> 70 % yield, white solid. Mp =71.2-72.5 °C; <sup>1</sup>H NMR (300 MHz, CDCl<sub>3</sub>) δ 1.44 (s, 9H), 2.70 (t, *J* = 7.2 Hz, 2H), 3.30-3.36 (m, 2H), 4.65 (br, 1H), 6.37 (br, 1H), 6.78 (d, *J* = 8.1 Hz, 2H ), 7.01 (d, *J* = 8.1 Hz, 2H).

To a solution of **2d** (1.18 g, 5.0 mmol) in CH<sub>3</sub>CN/H<sub>2</sub>O (20 mL, 4:1) was slowly added PhI(OAc)<sub>2</sub> (1.93 g, 6.0 mmol) at 0 °C. The reaction mixture was stirred for 1h, then dried over anhydrous Na<sub>2</sub>SO<sub>4</sub> and filtered. The solvent was removed under reduced pressure and the residue was purified by silica gel column chromatography to provide **3d**. 45% yield, yellow solid. Mp = 129.2-130.9°C; <sup>1</sup>H NMR (300 MHz, CDCl<sub>3</sub>) δ 1.43 (s, 9H), 1.93 (t, *J* = 6.9 Hz, 2H), 3.22-3.25 (m, 2H), 3.61 (br, 1H), 4.93 (br, 1H), 6.16 (d, *J* = 10.2 Hz, 2H), 6.90 (d, *J* = 10.2 Hz, 2H); <sup>13</sup>C NMR (75 MHz, CDCl<sub>3</sub>) δ 28.3, 36.0, 40.2, 68.7, 79.8, 127.8, 151.0, 156.1, 185.4; IR (film) 3344, 3252, 2971, 1697, 1660, 1617, 1537, 1275, 1216, 1166, 1077, 860, 748 cm<sup>-1</sup>; HRMS (MALDI): Exact mass calcd for C<sub>13</sub>H<sub>19</sub>NO<sub>4</sub>Na: 276.1206. Found: 276.1210.

**Synthesis of substrates **3e-h****

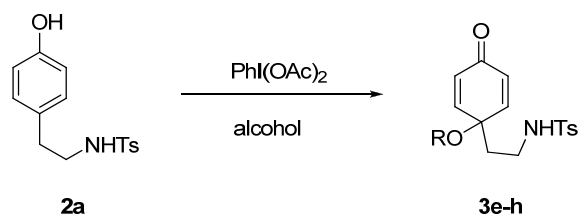

To a solution of **2a** (1.45 g, 5.0 mmol) in the corresponding alcohol (8 mL) was added a solution of  $\text{PhI}(\text{OAc})_2$  (2.40 g, 7.5 mmol) in  $\text{CH}_2\text{Cl}_2$  (20 mL) at 0 °C. The mixture was stirred at room temperature for 10 min. The solvent was removed under reduced pressure and the residue was purified by silica gel column chromatography to afford **3**.

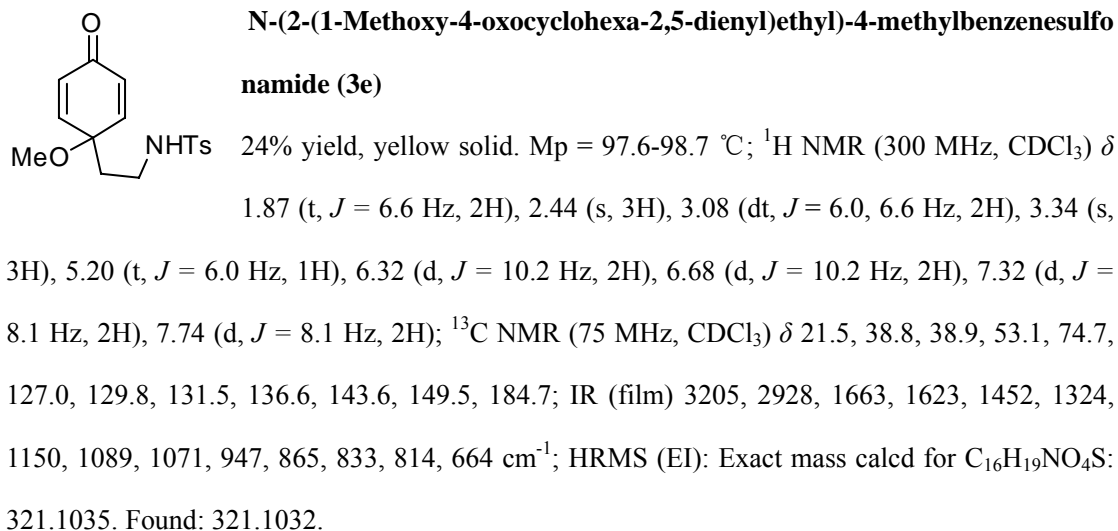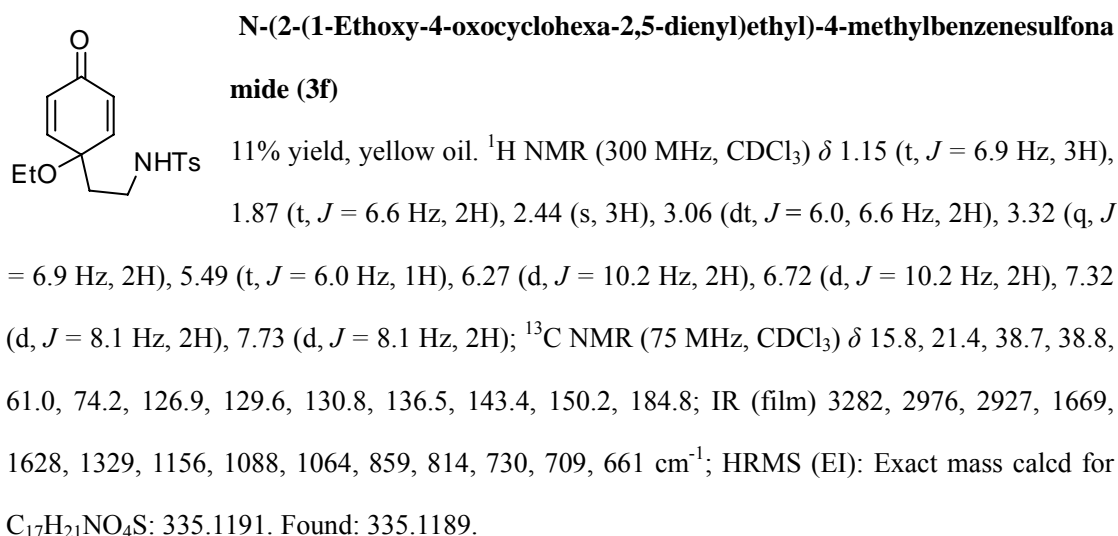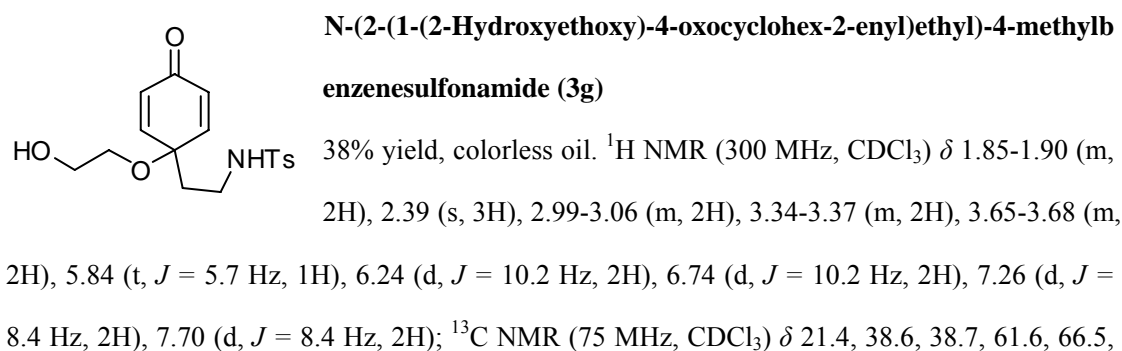

74.2, 126.9, 129.7, 130.9, 136.4, 143.5, 149.8, 184.8; IR (film) 3517, 3272, 2925, 1704, 1667, 1396, 1323, 1155, 1089, 857, 814, 659  $\text{cm}^{-1}$ ; HRMS (EI): Exact mass calcd for  $\text{C}_{17}\text{H}_{21}\text{NO}_5\text{S}$ : 351.1140. Found: 351.1138.

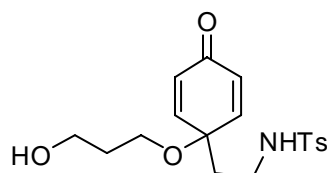

**N-(2-(1-(3-Hydroxypropoxy)-4-oxocyclohexa-2,5-dienyl)ethyl)-4-methylbenzenesulfonamide (3h)**

29% yield, pale yellow oil.  $^1\text{H}$  NMR (300 MHz,  $\text{CDCl}_3$ )  $\delta$  1.79 (quintet,  $J = 5.7$  Hz, 2H), 1.87 (t,  $J = 6.3$  Hz, 2H), 2.33 (br, 1H), 2.44 (s, 3H), 3.07 (app q,  $J = 6.0$  Hz, 2H), 3.43-3.47 (m, 2H), 3.76-3.79 (m, 2H), 6.03 (t,  $J = 6.3$  Hz, 1H), 6.30 (d,  $J = 10.2$  Hz, 2H), 6.77 (d,  $J = 10.2$  Hz, 2H), 7.32 (d,  $J = 8.1$  Hz, 2H), 7.35 (d,  $J = 8.1$  Hz, 2H);  $^{13}\text{C}$  NMR (75 MHz,  $\text{CDCl}_3$ )  $\delta$  21.5, 32.4, 38.8, 38.9, 60.7, 63.9, 74.4, 127.0, 129.7, 131.0, 136.7, 143.4, 149.9, 184.7; IR (film) 3521, 3272, 2926, 2875, 1666, 1624, 1599, 1494, 1323, 1154, 1081, 861, 814, 659  $\text{cm}^{-1}$ ; HRMS (MALDI): Exact mass calcd for  $\text{C}_{18}\text{H}_{24}\text{NO}_5\text{S}$ : 366.1370. Found: 366.1373.

**Synthesis of 1-(2-(4-methylphenylsulfonamido)ethyl)-4-oxocyclohexa-2,5-dienyl acetate (3i)**

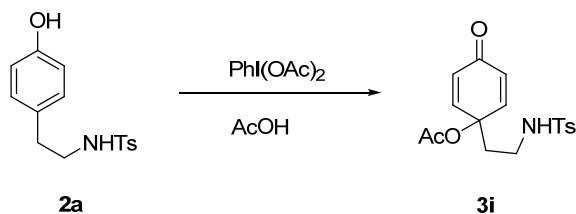

A solution of  $\text{PhI}(\text{OAc})_2$  (1.06 g, 3.3 mmol) in AcOH (25 mL) was added dropwise to a vigorously stirred solution of **2a** (873 mg, 3 mmol) in AcOH (25 mL) at room temperature. The mixture was stirred for 1h, and then it was diluted with EtOAc, washed with  $\text{Na}_2\text{CO}_3$  (aq.) and brine. The organic layer was separated and dried over anhydrous  $\text{Na}_2\text{SO}_4$ . The solvent was removed under reduced pressure and the residue was purified by silica gel column chromatography to afford **3i**. 25% yield, yellow oil.  $^1\text{H}$  NMR (300 MHz,  $\text{CDCl}_3$ )  $\delta$  2.02 (t,  $J = 6.6$  Hz, 2H), 2.06 (s, 3H), 2.44 (s, 3H), 3.01 (dt,  $J = 6.6, 7.8$  Hz, 2H), 5.18 (t,  $J = 6.0$  Hz, 1H), 6.24 (d,  $J = 10.2$  Hz, 2H), 6.82 (d,  $J = 10.2$  Hz, 2H), 7.31 (d,  $J = 8.4$  Hz, 2H), 7.71 (d,  $J = 8.4$  Hz, 2H);  $^{13}\text{C}$  NMR (75 MHz,  $\text{CDCl}_3$ )  $\delta$  20.9, 21.2, 37.8, 39.1, 75.0, 126.7, 128.7, 129.6, 136.1, 143.6, 147.4, 168.9, 184.6; IR (film) 3277, 2926, 1747, 1665, 1626, 1598, 1494, 1434, 1397, 1368, 1327, 1229, 1155, 1090, 1015,



932, 855, 814, 659  $\text{cm}^{-1}$ ; HRMS (MALDI): Exact mass calcd for  $\text{C}_{17}\text{H}_{19}\text{NO}_5\text{SNa}$ : 372.0876.  
Found: 372.0883.

**Synthesis of N-(1-(2-(4-methylphenylsulfonamido)ethyl)-4-oxocyclohexa-2,5-dienyl)acetamide (3j)**<sup>[5]</sup>

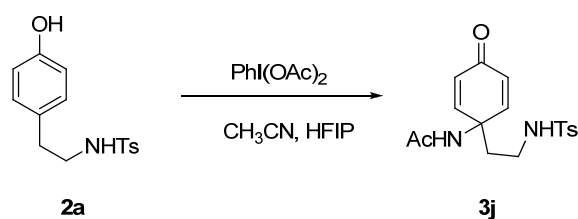

A solution of  $\text{PhI(OAc)}_2$  (1.9 g, 6.0 mmol) in HFIP (4 mL) was added dropwise to a vigorously stirred solution of **2a** (1.45 g, 5.0 mmol) in MeCN (17 mL) and HFIP (12 mL) at 15 °C. The mixture was stirred for 20 min and then was concentrated. The residue was purified by silica gel column chromatography to afford **3j**.<sup>[5]</sup> 37% yield, white solid.  $^1\text{H}$  NMR (300 MHz, acetone- $\text{d}_6$ ) 1.82 (s, 3H), 2.08-2.13 (m, 2H), 2.38 (s, 3H), 2.83-2.86 (m, 2H), 6.08 (d,  $J = 10.2$  Hz, 2H), 6.41 (br, 1H), 6.90 (d,  $J = 10.2$  Hz, 2H), 7.34 (d,  $J = 8.4$  Hz, 2H), 7.45 (br, 1H), 7.65 (d,  $J = 8.4$  Hz, 2H); IR (film) 3375, 1659, 1626, 1593, 1529, 1395, 1320, 1288, 1274, 1185, 1152, 1094, 1037, 1008, 927, 659  $\text{cm}^{-1}$ ; HRMS (MALDI): Exact mass calcd for  $\text{C}_{17}\text{H}_{21}\text{N}_2\text{O}_4\text{S}$ : 349.1217. Found: 349.1223.

**Synthesis of N-(2-(1-(3,4-dimethoxyphenyl)-4-oxocyclohexa-2,5-dienyl)ethyl)-4-methylbenzenesulfonamide (3k)**

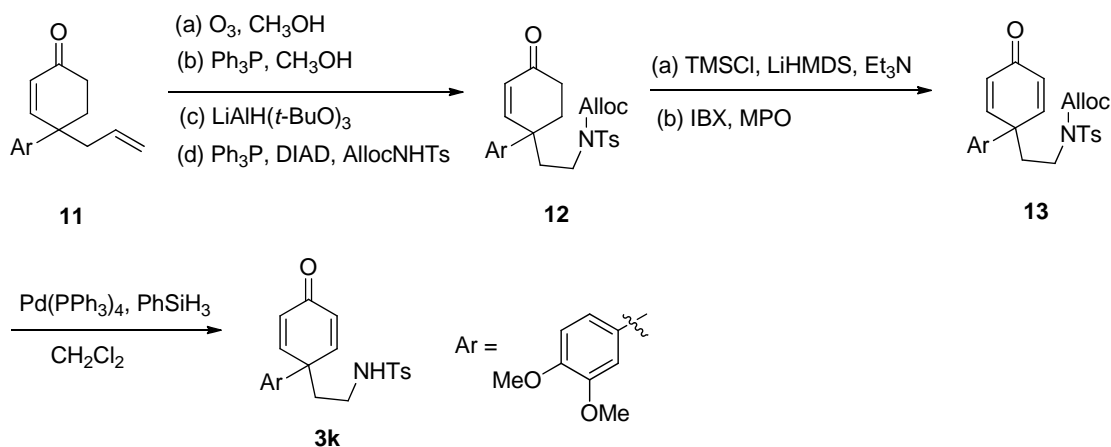

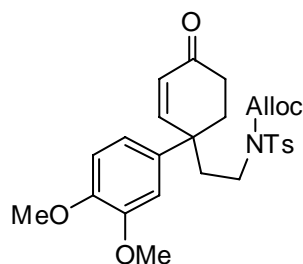

**Allyl 2-(1-(3,4-dimethoxyphenyl)-4-oxocyclohex-2-enyl)ethyl  
(tosyl) carbamate (**12**)**

To a solution of **11** (1.36 g, 5.0 mmol) in CH<sub>3</sub>OH (30 mL) at -78 °C was bubbled O<sub>3</sub> until the starting material **11** disappeared. The reaction was purged with argon for 10 min at -78 °C, and then PPh<sub>3</sub> (2.62 g, 10 mmol) was added. The reaction was stirred at room temperature for 30 min. The solvent was removed under reduced pressure and the residue was purified by short silica gel column chromatography (PE: EtOAc = 2:1) to afford aldehyde (994 mg, 52% yield, containing 25 mol% Ph<sub>3</sub>PO).

To a solution of the above aldehyde (902 mg, containing 25 mol% Ph<sub>3</sub>PO) in THF was added LiAlH(O<sup>*i*</sup>Bu)<sub>3</sub> (955 mg, 3.75 mmol) at 0°C. The reaction mixture was stirred for 5 min. The mixture was quenched with buffer solution (300 mL, pH = 7) and extracted with EtOAc. The combined organic layer was washed with brine, dried over anhydrous Na<sub>2</sub>SO<sub>4</sub>. The solvent was removed under reduced pressure to afford alcohol that was used directly in the next step.

To a solution of the above alcohol in THF (20 mL) was added Ph<sub>3</sub>P (891 mg, 3.3 mmol), allyl tosylcarbamate (763 mg, 3.0 mmol) and DIAD (687 mg, 3.3 mmol) at 0°C. The reaction mixture was stirred at room temperature for 3 h. The solvent was removed under reduced pressure and the residue was purified by silica gel column chromatography (PE: EtOAc = 2:1) to afford **7** (960 mg, 69% yield over two steps). <sup>1</sup>H NMR (300 MHz, CDCl<sub>3</sub>) δ 2.04-2.52 (m, 6H), 2.42 (m, 3H), 3.65-3.78 (m, 2H), 3.88 (s, 3H), 3.93 (s, 3H), 4.55 (d, *J* = 5.4 Hz, 2H), 5.21-5.26 (m, 2H), 5.70-5.83 (m, 1H), 6.23 (d, *J* = 9.9 Hz, 1H), 6.85 (s, 2H), 6.94 (s, 1H), 7.17 (d, *J* = 9.9 Hz, 1H), 7.29 (d, *J* = 8.1 Hz, 2H), 7.76 (d, *J* = 8.1 Hz, 2H); <sup>13</sup>C NMR (75 MHz, CDCl<sub>3</sub>) δ 21.5, 34.1, 36.7, 40.3, 42.6, 43.7, 55.7, 55.8, 67.6, 109.5, 110.7, 119.1, 119.2, 128.1, 129.3, 129.8, 130.7, 133.8, 136.2, 144.7, 147.9, 149.2, 151.7, 153.6, 199.1; IR (film) 2926, 2854, 1729, 1680, 1595, 1517, 1454, 1353, 1255, 1164, 1087, 1024, 852, 811, 766, 738, 703, 667 cm<sup>-1</sup>; HRMS (EI): Exact mass calcd for C<sub>27</sub>H<sub>31</sub>NO<sub>7</sub>S: 513.1821. Found: 513.1819.

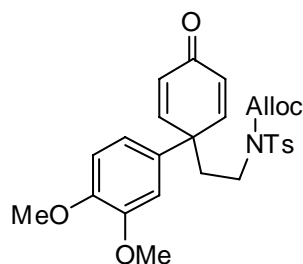

**Allyl 2-(1-(3,4-dimethoxyphenyl)-4-oxocyclohexa-2,5-dienyl)ethyl(tosyl)carbamate (**13**)**

To a solution of **12** (1.54 g, 3.0 mmol) in THF (60 mL) at -78 °C under Ar atmosphere was added Et<sub>3</sub>N (8.28 mL, 60.0 mmol), TMSCl (7.32 mL, 57.0 mmol). The reaction was stirred at -78 °C for 30 min.

The mixture was quenched with buffer solution (pH = 7.4) and extracted with EtOAc. The combined organic layer was washed with brine, dried over anhydrous Na<sub>2</sub>SO<sub>4</sub>. The solvent was removed under reduced pressure to provide TMS enol ether that was used directly in the next step.

To a flask containing DMSO (12 mL) were added IBX (1.16 g, 4.2 mmol) and MPO (528 mg, 4.2 mmol). This mixture was stirred at ambient temperature to result a clear solution (about 30 min). Then this solution was added in one portion at ambient temperature to a solution of the above crude TMS enol ether in DMSO (12 mL). The reaction was stirred at room temperature for 6h. The mixture was quenched with water and extracted with EtOAc. The combined organic layer was washed with brine, dried over anhydrous Na<sub>2</sub>SO<sub>4</sub>. The solvent was removed under reduced pressure and the residue was purified by silica gel column chromatography (PE: EtOAc = 2:1) to provide dienenone **13** (982 mg, 64% yield over two steps). <sup>1</sup>H NMR (400 MHz, CDCl<sub>3</sub>) δ 2.44 (s, 3H), 2.58-2.62 (m, 2H), 3.77-3.81 (m, 2H), 3.87 (s, 6H), 4.58 (d, *J* = 6.0 Hz, 2H), 5.22-5.28 (m, 2H), 5.74-5.80 (m, 1H), 6.41 (d, *J* = 6.8 Hz, 2H), 6.81-6.92 (m, 3H), 6.99 (d, *J* = 6.8 Hz, 2H), 7.31 (d, *J* = 8.4 Hz, 2H), 7.79 (d, *J* = 8.4 Hz, 2H); <sup>13</sup>C NMR (100 MHz, CDCl<sub>3</sub>) δ 21.4, 36.5, 43.8, 47.1, 55.8, 55.9, 67.7, 109.5, 111.3, 118.5, 119.3, 128.0, 128.6, 129.3, 130.5, 130.6, 136.0, 144.8, 148.6, 149.2, 151.7, 153.1, 185.6; IR (film) 2926, 2927, 1719, 1685, 1596, 1517, 1463, 1412, 1335, 1258, 1159, 1098, 1023, 935, 848, 806, 730, 659 cm<sup>-1</sup>; HRMS (EI): Exact mass calcd for C<sub>27</sub>H<sub>29</sub>NO<sub>7</sub>S: 511.1665. Found: 511.1668.

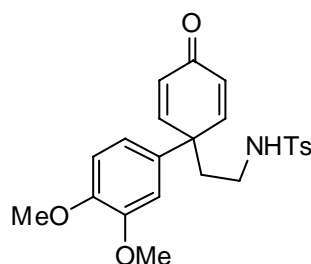

**N-(2-(1-(3,4-Dimethoxyphenyl)-4-oxocyclohexa-2,5-dienyl)ethyl)-4-methylbenzenesulfonamide (**3k**)**

To a solution of **13** (540 mg, 1.06 mmol) in CH<sub>2</sub>Cl<sub>2</sub> (10 mL) was added PhSiH<sub>3</sub> (571 mg, 5.28 mmol) and Pd(PPh<sub>3</sub>)<sub>4</sub> (133 mg, 0.10 mmol). The reaction mixture was stirred at room temperature for 10

min and quenched with water. The mixture was extracted with CH<sub>2</sub>Cl<sub>2</sub>. The combined organic layer

was washed with brine, dried over anhydrous  $\text{Na}_2\text{SO}_4$ . The solvent was removed under reduced pressure and the residue was purified by preparative TLC followed by preparative HPLC to afford **3h** (166 mg, 37% yield).  $^1\text{H}$  NMR (300 MHz,  $\text{CDCl}_3$ )  $\delta$  2.35-2.42 (m, 2H), 2.42 (s, 3H), 2.85-2.92 (m, 2H), 3.81 (s, 3H), 3.85 (s, 3H), 5.31 (t,  $J = 6.0$  Hz, 1H), 6.31 (d,  $J = 10.2$  Hz, 2H), 6.70 (s, 1H), 6.81 (s, 2H), 6.84 (d,  $J = 10.2$  Hz, 2H), 7.29 (d,  $J = 8.1$  Hz, 2H), 7.69 (d,  $J = 8.1$  Hz, 2H);  $^{13}\text{C}$  NMR (75 MHz,  $\text{CDCl}_3$ )  $\delta$  21.4, 37.4, 39.2, 47.3, 55.8, 55.9, 109.6, 111.4, 118.5, 126.9, 128.6, 129.8, 130.7, 136.5, 143.6, 148.6, 149.2, 153.4, 185.8; IR (film) 3268, 2969, 1738, 1661, 1621, 1517, 1401, 1365, 1258, 1233, 1157, 1092, 1024, 869  $\text{cm}^{-1}$ ; HRMS (EI): Exact mass calcd for  $\text{C}_{23}\text{H}_{25}\text{NO}_5\text{S}$ : 427.1453. Found: 427.1454.

### 2.3 General procedure for preparation of substrates 6a-k

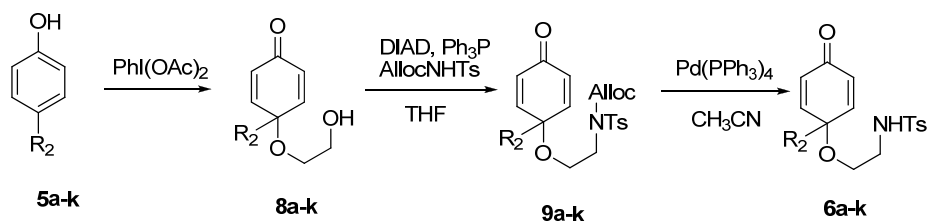

Compounds **8a-k** were prepared according to the literature<sup>[2]</sup>.

To a solution of **8** (2 mmol), AllocNHTs (2.2 mmol) and  $\text{Ph}_3\text{P}$  (2.5 mmol) in THF (8 mL) was added dropwise DIAD (2.2 mmol) at  $0^\circ\text{C}$ . The mixture was stirred at room temperature until the starting material **8** disappeared (monitored by TLC). Then it was diluted with water, extracted with EtOAc. The organic layer was washed with brine and dried over anhydrous  $\text{Na}_2\text{SO}_4$ . The solvent was removed under reduced pressure and the residue was purified by silica gel column chromatography to provide **9** (containing diisopropyl hydrazine-1,2-dicarboxylate) that was used directly in the next step.

To a solution of **9** obtained above and piperidine (510 mg, 6 mmol) in  $\text{CH}_3\text{CN}$  (12 mL) was added  $\text{Pd(PPh}_3)_4$  (50 mg, 0.04 mmol). The reaction mixture was stirred at room temperature for 10 min. Then it was diluted with water and extracted with ethyl acetate. The combined organic layers were washed with brine, dried over anhydrous  $\text{Na}_2\text{SO}_4$  and filtered. The solvent was removed under reduced pressure and the residue was purified by silica gel column chromatography and recrystallization from PE/ EtOAc to provide **6**.

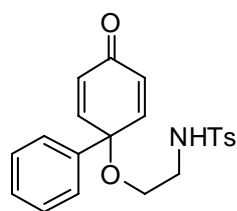

**4-Methyl-N-(2-(4-oxo-1-phenylcyclohexa-2,5-dienyloxy)ethyl)benzenesulfonamide (6a)**

52% yield over two steps, pale yellow solid. Mp = 146.6-147.5 °C;  $^1\text{H}$  NMR (300 MHz,  $\text{CDCl}_3$ )  $\delta$  2.43 (s, 3H), 3.25 (dt,  $J$  = 5.4, 5.7 Hz, 2H), 3.54 (t,  $J$  = 5.1 Hz, 2H), 5.28 (t,  $J$  = 6.3 Hz, 1H), 6.30 (d,  $J$  = 10.5 Hz, 2H), 6.67 (d,  $J$  = 10.5 Hz, 2H), 7.27-7.38 (m, 7H), 7.77 (d,  $J$  = 8.1 Hz, 2H);  $^{13}\text{C}$  NMR (75 MHz,  $\text{CDCl}_3$ )  $\delta$  21.5, 43.3, 63.4, 76.1, 125.5, 127.0, 128.5, 128.8, 129.7, 129.8, 137.0, 137.6, 143.6, 149.7, 185.2; IR (film) 3298, 1665, 1622, 1321, 1156, 1077, 1049, 957, 854, 731, 701, 666  $\text{cm}^{-1}$ ; HRMS (EI): Exact mass calcd for  $\text{C}_{21}\text{H}_{21}\text{NO}_4\text{S}$ : 383.1191. Found: 383.1192.

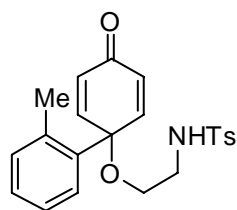

**4-Methyl-N-(2-(4-oxo-1-o-tolylcyclohexa-2,5-dienyloxy)ethyl)benzenesulfonamide (6b)**

42% yield over two steps, pale yellow solid. Mp = 116.6-117.4 °C;  $^1\text{H}$  NMR (300 MHz,  $\text{CDCl}_3$ )  $\delta$  2.32 (s, 3H), 2.42 (s, 3H), 3.22 (dt,  $J$  = 5.1, 5.7 Hz, 2H), 3.46 (t,  $J$  = 5.4 Hz, 2H), 5.21 (t,  $J$  = 6.0 Hz, 1H), 6.35 (d,  $J$  = 10.2 Hz, 2H), 6.69 (d,  $J$  = 10.2 Hz, 2H), 7.11-7.24 (m, 3H), 7.28 (d,  $J$  = 8.4 Hz, 2H), 7.50-7.53 (m, 1H), 7.74 (d,  $J$  = 8.4 Hz, 2H);  $^{13}\text{C}$  NMR (75 MHz,  $\text{CDCl}_3$ )  $\delta$  21.0, 21.4, 43.2, 62.2, 75.5, 126.0, 126.4, 126.9, 128.6, 129.7, 130.6, 132.6, 135.6, 136.0, 137.0, 143.5, 147.7, 185.1; IR (film) 3271, 1662, 1624, 1380, 1349, 1330, 1164, 1092, 1068, 1017, 952, 865, 816, 760, 739, 690  $\text{cm}^{-1}$ ; HRMS (EI): Exact mass calcd for  $\text{C}_{22}\text{H}_{23}\text{NO}_4\text{S}$ : 397.1348. Found: 397.1352.

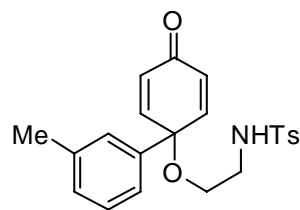

**4-Methyl-N-(2-(4-oxo-1-m-tolylcyclohexa-2,5-dienyloxy)ethyl)benzenesulfonamide (6c)**

34% yield over two steps, white solid. Mp = 170.9-171.5 °C;  $^1\text{H}$  NMR (300 MHz,  $\text{CDCl}_3$ )  $\delta$  2.34 (s, 3H), 2.43 (s, 3H), 3.25 (dt,  $J$  = 5.4, 6.0 Hz, 2H), 3.54 (t,  $J$  = 5.4 Hz, 2H), 4.97 (d,  $J$  = 6.3 Hz, 1H), 6.31 (d,  $J$  = 10.2 Hz, 2H), 6.67 (d,  $J$  = 10.2 Hz, 2H), 7.12-7.26 (m, 4H), 7.30 (d,  $J$  = 8.4 Hz, 2H), 7.76 (d,  $J$  = 8.4 Hz, 2H);  $^{13}\text{C}$  NMR (75 MHz,  $\text{CDCl}_3$ )  $\delta$  21.5, 43.3, 63.4, 76.1, 122.6, 126.1, 127.0, 128.7, 129.3, 129.7, 129.8, 137.0, 137.5, 138.6, 143.6, 149.7, 185.2; IR (film) 3264, 1666, 1624, 1600, 1329, 1163, 1080, 957, 871, 813, 735, 708, 654  $\text{cm}^{-1}$ ; HRMS (MALDI): Exact mass calcd for  $\text{C}_{22}\text{H}_{23}\text{NO}_4\text{SNa}$ : 420.1240.

Found: 420.1251.

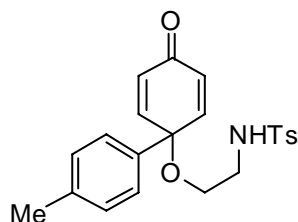

**4-Methyl-N-(2-(4-oxo-1-p-tolylcyclohexa-2,5-dienyloxy)ethyl)benzenesulfonamide (6d)**

42% yield over two steps, white solid. Mp = 161.5-162.2 °C;  $^1\text{H}$  NMR (300 MHz,  $\text{CDCl}_3$ )  $\delta$  2.33 (s, 3H), 2.43 (s, 3H), 3.25 (app q,  $J$  = 5.4 Hz, 2H), 3.53 (t,  $J$  = 5.1 Hz, 2H), 5.08 (t,  $J$  = 6.0 Hz, 1H), 6.29 (d,  $J$  = 10.2 Hz, 2H), 6.66 (d,  $J$  = 10.2 Hz, 2H), 7.14 (d,  $J$  = 8.4 Hz, 2H), 7.24 (d,  $J$  = 8.4 Hz, 2H), 7.30 (d,  $J$  = 8.1 Hz, 2H), 7.77 (d,  $J$  = 8.1 Hz, 2H);  $^{13}\text{C}$  NMR (75 MHz,  $\text{CDCl}_3$ )  $\delta$  21.0, 21.4, 43.3, 63.3, 76.0, 125.4, 126.9, 129.4, 129.6, 129.7, 134.6, 137.0, 138.4, 143.5, 149.8, 185.2; IR (film) 3281, 1660, 1621, 1596, 1409, 1396, 1326, 1163, 1092, 1075, 954, 856, 833, 811, 708  $\text{cm}^{-1}$ ; HRMS(MALDI): Exact mass calcd for  $\text{C}_{22}\text{H}_{23}\text{NO}_4\text{SNa}$ : 420.1240. Found: 420.1255.

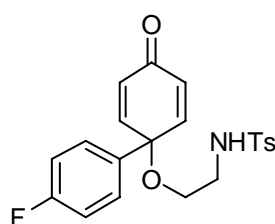

**N-(2-(1-(4-Fluorophenyl)-4-oxocyclohexa-2,5-dienyloxy)ethyl)-4-methylbenzenesulfonamide (6e)**

50% yield over two steps, pale yellow solid. Mp = 141.5-142.6 °C.  $^1\text{H}$  NMR (300 MHz,  $\text{CDCl}_3$ )  $\delta$  2.4 (s, 3H), 3.25 (dt,  $J$  = 5.4, 5.7 Hz, 2H), 3.54 (t,  $J$  = 5.1 Hz, 2H), 5.14 (t,  $J$  = 6.0 Hz, 1H), 6.31 (d,  $J$  = 10.2 Hz, 2H), 6.64 (d,  $J$  = 10.2 Hz, 2H), 6.99-7.04 (m, 2H), 7.27-7.37 (m, 4H), 7.77 (d,  $J$  = 8.4 Hz, 2H);  $^{13}\text{C}$  NMR (75 MHz,  $\text{CDCl}_3$ )  $\delta$  21.4, 43.2, 63.5, 75.7, 115.5 (d,  $J$  = 21.8 Hz), 126.9, 127.4 (d,  $J$  = 8.3 Hz), 129.7, 129.8, 133.4 (d,  $J$  = 2.9 Hz), 137.0, 143.5, 149.5, 162.5 (d,  $J$  = 246.5 Hz), 185.0;  $^{19}\text{F}$  NMR (282 MHz,  $\text{CDCl}_3$ )  $\delta$  -113.59; IR (film) 3307, 1665, 1622, 1503, 1321, 1220, 1157, 1098, 1077, 1055, 954, 857, 841, 815, 664  $\text{cm}^{-1}$ ; HRMS (MALDI): Exact mass calcd for  $\text{C}_{21}\text{H}_{20}\text{NO}_4\text{FSNa}$ : 424.0989. Found: 424.0999.

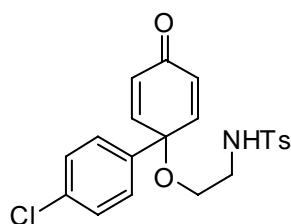

**N-(2-(1-(4-Chlorophenyl)-4-oxocyclohexa-2,5-dienyloxy)ethyl)-4-methylbenzenesulfonamide (6f)**

41% yield over two steps, pale yellow solid. Mp = 148.9-149.7 °C;  $^1\text{H}$  NMR (300 MHz,  $\text{CDCl}_3$ )  $\delta$  2.43 (s, 3H), 3.25 (dt,  $J$  = 5.1, 5.7 Hz, 2H), 3.53 (t,  $J$  = 5.1 Hz, 2H), 5.44 (t,  $J$  = 6.0 Hz, 1H), 6.31 (d,  $J$  = 10.2 Hz, 2H), 6.63 (d,  $J$  = 10.2 Hz,

2H), 7.25-7.33 (m, 6H), 7.77 (d,  $J = 8.1$  Hz, 2H);  $^{13}\text{C}$  NMR (75 MHz,  $\text{CDCl}_3$ )  $\delta$  21.5, 43.2, 63.5, 75.8, 126.9, 127.0, 128.9, 129.8, 130.1, 134.3, 136.2, 137.0, 143.6, 149.2, 184.9; IR (film) 3284, 1666, 1489, 1413, 1398, 1326, 1164, 1076, 1055, 1015, 858, 827, 812, 735  $\text{cm}^{-1}$ ; HRMS (MALDI): Exact mass calcd for  $\text{C}_{21}\text{H}_{20}\text{NO}_4\text{SCINa}$ : 440.0694. Found: 440.0707.

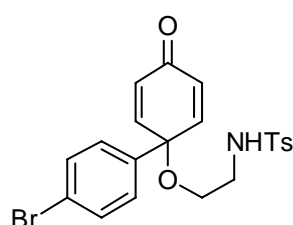

**N-(2-(1-(4-Bromophenyl)-4-oxocyclohexa-2,5-dienyloxy)ethyl)-4-methylbenzenesulfonamide (6g)**

40% yield over two steps, yellow solid. Mp = 129.1-130.5  $^{\circ}\text{C}$ ;  $^1\text{H}$  NMR (300 MHz,  $\text{CDCl}_3$ )  $\delta$  2.44 (s, 3H), 3.25 (dt,  $J = 5.1, 5.4$  Hz, 2H), 3.54 (t,  $J = 5.1$  Hz, 2H), 5.15 (br, 1H), 6.32 (d,  $J = 9.9$  Hz, 2H), 6.63 (d,  $J = 9.9$  Hz, 2H), 7.23 (d,  $J = 8.1$  Hz, 2H), 7.30 (d,  $J = 8.1$  Hz, 2H), 7.43 (d,  $J = 8.1$  Hz, 2H), 7.75 (d,  $J = 8.1$  Hz, 2H);  $^{13}\text{C}$  NMR (75 MHz,  $\text{CDCl}_3$ )  $\delta$  21.5, 43.2, 63.6, 75.8, 122.5, 127.0, 127.4, 129.8, 130.1, 131.8, 136.7, 137.0, 143.6, 149.1, 184.9; IR (film) 3288, 2923, 1667, 1624, 1411, 1326, 1164, 1074, 1055, 1011, 975, 857, 827, 813, 689  $\text{cm}^{-1}$ ; HRMS (MALDI): Exact mass calcd for  $\text{C}_{21}\text{H}_{21}\text{NO}_4\text{SBr}$ : 462.0369. Found: 462.0381.

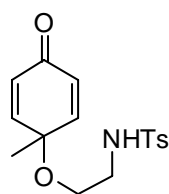

**4-Methyl-N-(2-(1-methyl-4-oxocyclohexa-2,5-dienyloxy)ethyl)benzenesulfonamide (6h)**

45% yield over two steps, white solid. Mp = 92.8-94.1  $^{\circ}\text{C}$ ;  $^1\text{H}$  NMR (300 MHz,  $\text{CDCl}_3$ )  $\delta$  1.37 (s, 3H), 2.44 (s, 3H), 3.10 (dt,  $J = 5.4, 5.7$  Hz, 2H), 3.30 (d,  $J = 5.7$  Hz, 2H), 5.12 (br, 1H), 6.22 (d,  $J = 10.2$  Hz, 2H), 6.64 (d,  $J = 10.2$  Hz, 2H), 7.32 (d,  $J = 8.4$  Hz, 2H), 7.76 (d,  $J = 8.4$  Hz, 2H);  $^{13}\text{C}$  NMR (75 MHz,  $\text{CDCl}_3$ )  $\delta$  21.5, 26.1, 43.2, 63.7, 72.4, 127.0, 129.7, 130.3, 137.0, 143.6, 151.0, 184.8; IR (film) 3210, 1660, 1620, 1441, 1325, 1155, 1089, 1077, 1055, 972, 863, 810, 663  $\text{cm}^{-1}$ ; HRMS (EI): Exact mass calcd for  $\text{C}_{16}\text{H}_{19}\text{NO}_4\text{S}$ : 321.1035. Found: 321.1030.

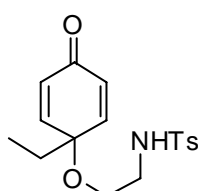

**N-(2-(1-Ethyl-4-oxocyclohexa-2,5-dienyloxy)ethyl)-4-methylbenzenesulfonamide (6i)**

69% yield over two steps, yellow oil.  $^1\text{H}$  NMR (300 MHz,  $\text{CDCl}_3$ )  $\delta$  0.80 (t,  $J$

= 7.5 Hz, 3H), 1.72 (q,  $J$  = 7.5 Hz, 2H), 2.44 (s, 3H), 3.09-3.14 (m, 2H), 3.33 (d,  $J$  = 5.4 Hz, 2H), 4.83 (br, 1H), 6.30 (d,  $J$  = 8.1 Hz, 2H), 6.57 (d,  $J$  = 8.1 Hz, 2H), 7.32 (d,  $J$  = 8.4 Hz, 2H), 7.75 (d,  $J$  = 8.4 Hz, 2H);  $^{13}\text{C}$  NMR (75 MHz,  $\text{CDCl}_3$ )  $\delta$  7.6, 21.4, 31.9, 43.2, 63.4, 76.1, 127.0, 129.7, 131.4, 137.0, 143.5, 150.2, 185.2; IR (film) 3254, 2926, 1666, 1631, 1323, 1161, 1076, 952, 861, 811, 730, 653  $\text{cm}^{-1}$ ; HRMS (EI): Exact mass calcd for  $\text{C}_{17}\text{H}_{21}\text{NO}_4\text{S}$ : 335.1191. Found: 335.1192.

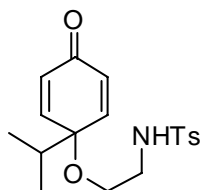

**N-(2-(1-iso-Propyl-4-oxocyclohexa-2,5-dienyloxy)ethyl)-4-methylbenzenesulfonamide (6j)**

33% yield over two steps, white solid. Mp = 91.5-92.2 °C;  $^1\text{H}$  NMR (300 MHz,  $\text{CDCl}_3$ )  $\delta$  0.87 (d,  $J$  = 7.2 Hz, 6H), 1.90 (heptet,  $J$  = 7.2 Hz, 1H), 2.44 (s, 3H), 3.09-3.14 (m, 2H), 3.28-3.32 (m, 2H), 5.12 (t,  $J$  = 5.7 Hz, 1H), 6.31 (d,  $J$  = 7.5 Hz, 2H), 6.59 (d,  $J$  = 7.5 Hz, 2H), 7.32 (d,  $J$  = 8.4 Hz, 2H), 7.76 (d,  $J$  = 8.4 Hz, 2H);  $^{13}\text{C}$  NMR (75 MHz,  $\text{CDCl}_3$ )  $\delta$  16.9, 21.5, 36.4, 43.3, 63.3, 78.0, 127.0, 129.7, 132.1, 137.0, 143.5, 149.3, 185.3; IR (film) 3232, 2967, 1659, 1621, 1328, 1156, 1087, 1063, 1017, 950, 876, 849, 804, 663  $\text{cm}^{-1}$ ; HRMS (ESI): Exact mass calcd for  $\text{C}_{18}\text{H}_{23}\text{NO}_4\text{SNa}$ : 372.1240. Found: 372.1248.

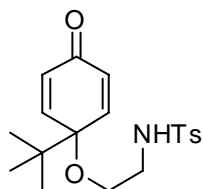

**N-(2-(1-tert-Butyl-4-oxocyclohexa-2,5-dienyloxy)ethyl)-4-methylbenzenesulfonamide (6k)**

31% yield over two steps, white solid. Mp = 90.6-91.8 °C;  $^1\text{H}$  NMR (300 MHz,  $\text{CDCl}_3$ )  $\delta$  0.95 (s, 9H), 2.44 (s, 3H), 3.14 (dt,  $J$  = 5.4, 6.0 Hz, 2H), 3.28 (t,  $J$  = 5.4 Hz, 2H), 4.99 (t,  $J$  = 6.0 Hz, 1H), 6.31 (d,  $J$  = 8.7 Hz, 2H), 6.74 (d,  $J$  = 8.7 Hz, 2H), 7.32 (d,  $J$  = 8.1 Hz, 2H), 7.76 (d,  $J$  = 8.1 Hz, 2H);  $^{13}\text{C}$  NMR (75 MHz,  $\text{CDCl}_3$ )  $\delta$  21.5, 25.5, 39.4, 43.5, 63.4, 79.3, 127.0, 129.7, 132.1, 137.1, 143.6, 149.5, 184.6; IR (film) 3225, 2958, 2872, 1661, 1619, 1328, 1155, 1063, 858, 810, 660  $\text{cm}^{-1}$ ; HRMS (ESI): Exact mass calcd for  $\text{C}_{19}\text{H}_{25}\text{NO}_4\text{SNa}$ : 386.1397. Found: 386.1406.

**References:**

- 1 Vakulya, B.; Varga, S.; Csampai, A.; Soos, T. *Org. Lett.* **2005**, 7, 1967.
- 2 Gu, Q.; Rong, Z.-Q.; Zheng, C.; You, S.-L. *J. Am. Chem. Soc.* **2010**, 132, 4056.
- 3 Kuglstatter, A.; Stahl, M.; Peters, J.-U.; Huber, W.; Stihle, M.; Schlatter, D.; Benz, J.; Ruf, A.;



Roth, D.; Enderle, T.; Hennig, M. *Bioorg. Med. Chem. Lett.* **2008**, *18*, 1304.

4 Cuny, G. D. *Tetrahedron Lett.* **2004**, *45*, 5167.

5 Liang, H.; Ciufolini, M. A. *J. Org. Chem.* **2008**, *73*, 4299.

6 Taber, D. F.; He, Y. *J. Org. Chem.* **2005**, *70*, 7711.

7 Xing, D.; Yang, D. *Org. Lett.* **2010**, *12*, 1068.

## 2.4 General procedure for asymmetric aza-Michael reaction

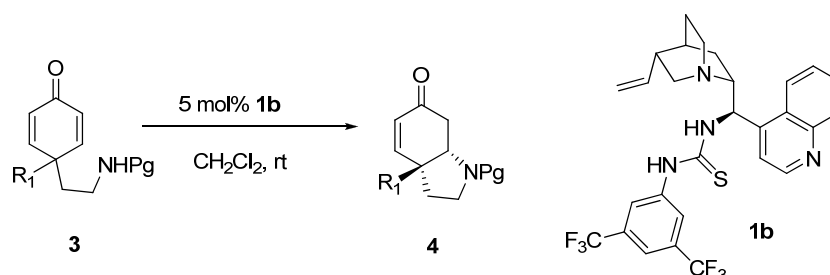

To a flame dried Schlenk flask were added compound **3** (0.2 mmol), CH<sub>2</sub>Cl<sub>2</sub> (2 mL) and catalyst **1b** (5.64 mg, 0.01 mmol). The mixture was stirred at room temperature until the starting material disappeared (monitored by TLC). The solvent was removed under reduced pressure, and the residue was purified by preparative TLC to afford product **4**.

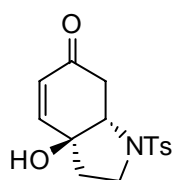

### (3aS,7aS)-3a-Hydroxy-1-tosyl-3,3a,7,7a-tetrahydro-1H-indol-6(2H)-one (**4a**)

White solid, 94% yield, 97% *ee*.  $[\alpha]_D^{20} = +320^\circ$  ( $c = 0.5$ , acetone); Mp = 127.8-128.9 °C; <sup>1</sup>H NMR (300 MHz, CDCl<sub>3</sub>)  $\delta$  2.03 (s, 1H), 2.06-2.16 (m, 2H), 2.43 (s, 3H), 2.55 (dd,  $J = 10.5, 16.8$  Hz, 1H), 3.04 (dd,  $J = 6.3, 16.8$  Hz, 1H), 3.45-3.52 (m, 1H), 3.61-3.68 (m, 1H), 3.95 (dd,  $J = 6.0, 10.5$  Hz, 1H), 5.97 (d,  $J = 10.2$  Hz, 1H), 6.69 (d,  $J = 10.2$  Hz, 1H), 7.32 (d,  $J = 7.8$  Hz, 2H), 7.73 (d,  $J = 7.8$  Hz, 2H); <sup>13</sup>C NMR (75 MHz, CDCl<sub>3</sub>)  $\delta$  21.5, 36.0, 44.4, 47.1, 66.3, 76.2, 127.5, 129.0, 129.7, 133.7, 143.9, 148.4, 196.7; IR (film) 3358, 1658, 1341, 1160, 1144, 1118, 1088, 1046, 1030, 892, 743, 718 cm<sup>-1</sup>; HRMS (EI): Exact mass calcd for C<sub>15</sub>H<sub>17</sub>NO<sub>4</sub>S: 307.0878. Found: 307.0876. The enantiomeric ratio was determined by Daicel Chiralpak AD-H (25 cm), Hexanes / IPA = 80 / 20, 1.0 mL/min<sup>-1</sup>,  $\lambda = 220$  nm,  $t_R$  (minor) = 10.81 min,  $t_R$  (major) = 24.55 min.

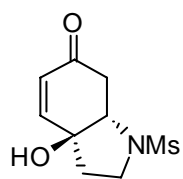

**(3aS,7aS)-3a-hydroxy-1-(methylsulfonyl)-3,3a,7,7a-tetrahydro-1H-indol-6(2H)-one (4b)**

White solid, 26% yield, 80% *ee*.  $[\alpha]_{\text{D}}^{20} = +75.0^{\circ}$  ( $c = 0.25$ ,  $\text{CH}_3\text{OH}$ ); Mp = 155.0-156.1  $^{\circ}\text{C}$ ;  $^1\text{H}$  NMR (300 MHz,  $\text{CD}_3\text{OD}$ )  $\delta$  2.18-2.34 (m, 2H), 2.62-2.71 (m, 1H), 2.78-2.85 (m, 1H), 2.93 (s, 3H), 3.58-3.63 (m, 2H), 3.96 (dd,  $J = 6.0, 10.5$  Hz, 1H), 5.98 (d,  $J = 10.2$  Hz, 1H), 6.88 (d,  $J = 10.2$  Hz, 1H);  $^{13}\text{C}$  NMR (75 MHz,  $\text{CD}_3\text{OD}$ )  $\delta$  34.2, 37.0, 45.5, 67.7, 77.1, 129.2, 151.3, 199.0; IR (film) 3474, 1673, 1318, 1287, 1253, 1195, 1150, 1103, 1086, 1052, 1024, 979, 967, 890, 818, 759  $\text{cm}^{-1}$ ; HRMS (EI): Exact mass calcd for  $\text{C}_9\text{H}_{13}\text{NO}_4\text{S}$ : 231.0565. Found: 231.0561. The enantiomeric ratio was determined by Daicel Chiralpak AD-H (25 cm), Hexanes / IPA = 80 / 20, 1.0 mL/min $^{-1}$ ,  $\lambda = 220$  nm,  $t_{\text{R}}$  (minor) = 8.81 min,  $t_{\text{R}}$  (major) = 13.19 min.

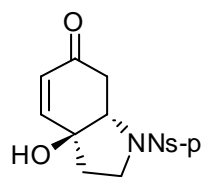

**(3aS,7aS)-3a-Hydroxy-1-(4-nitrophenylsulfonyl)-3,3a,7,7a-tetrahydro-1H-indol-6(2H)-one (4c)**

White solid, 75% yield, 87% *ee*.  $[\alpha]_{\text{D}}^{20} = +338^{\circ}$  ( $c = 0.2$ ,  $\text{CH}_3\text{OH}$ ); Mp = 212.8-213.4  $^{\circ}\text{C}$ ;  $^1\text{H}$  NMR (300 MHz,  $\text{CD}_3\text{OD}$ )  $\delta$  1.97-1.99 (m, 1H), 2.21-2.24 (m, 1H), 2.67-2.76 (m, 1H), 2.88-2.95 (m, 1H), 3.40-3.43 (m, 1H), 3.65-3.68 (m, 1H), 3.92-3.95 (m, 1H), 5.92 (d,  $J = 10.2$  Hz, 1H), 5.72 (d,  $J = 10.2$  Hz, 1H), 8.09 (d,  $J = 9.0$  Hz, 2H), 8.40 (d,  $J = 9.2$  Hz, 2H);  $^{13}\text{C}$  NMR (75 MHz,  $\text{CD}_3\text{OD}$ )  $\delta$  36.7, 45.5, 68.0, 76.8, 125.2, 129.2, 130.3, 143.8, 151.1, 198.6; IR (film) 3327, 2472, 1662, 1532, 1346, 1300, 1171, 1145, 1116, 1105, 1092, 1051, 1032, 1007, 988, 892, 738, 683, 628  $\text{cm}^{-1}$ ; HRMS (EI): Exact mass calcd for  $\text{C}_{14}\text{H}_{14}\text{N}_2\text{O}_6\text{S}$ : 338.0573. Found: 338.0575. The enantiomeric ratio was determined by Daicel Chiralpak AD-H (25 cm), Hexanes / IPA = 80 / 20, 1.0 mL/min $^{-1}$ ,  $\lambda = 220$  nm,  $t_{\text{R}}$  (minor) = 19.84 min,  $t_{\text{R}}$  (major) = 36.28 min.

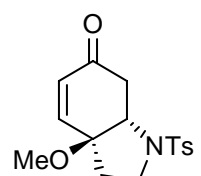

**(3aS,7aS)-3a-Methoxy-1-tosyl-3,3a,7,7a-tetrahydro-1H-indol-6(2H)-one (4e)**

Yellow oil, 83% yield, 94% *ee*.  $[\alpha]_{\text{D}}^{20} = +320.0^{\circ}$  ( $c = 0.5$ , acetone);  $^1\text{H}$  NMR (300 MHz,  $\text{CDCl}_3$ )  $\delta$  2.08-2.16 (m, 2H), 2.44 (s, 3H), 2.60 (dd,  $J = 10.5, 16.5$  Hz, 1H), 2.75 (s, 3H), 3.12 (dd,  $J = 6.6, 10.5$  Hz, 1H), 3.38-3.47 (m, 1H), 3.66-3.71 (m, 1H), 4.10

(dd,  $J = 6.6, 10.5$  Hz, 1H), 6.10 (d,  $J = 10.5$  Hz, 1H), 6.65 (d,  $J = 10.5$  Hz, 1H), 7.34 (d,  $J = 8.1$  Hz, 2H), 7.75 (d,  $J = 8.1$  Hz, 2H);  $^{13}\text{C}$  NMR (75 MHz,  $\text{CDCl}_3$ )  $\delta$  21.5, 35.5, 45.3, 47.4, 50.9, 59.4, 81.8, 127.5, 129.6, 132.0, 134.1, 143.9, 147.0, 196.2; IR (film) 2940, 1683, 1597, 1443, 1383, 1159, 1084, 1068, 1029, 1015, 927, 730, 708, 660, 612  $\text{cm}^{-1}$ ; HRMS (EI): Exact mass calcd for  $\text{C}_{16}\text{H}_{19}\text{NO}_4\text{S}$ : 321.1035. Found: 321.1032. The enantiomeric ratio was determined by Daicel Chiralcel OD-H (25 cm), Hexanes / IPA = 80 / 20, 1.0 mL/min $^{-1}$ ,  $\lambda = 220$  nm,  $t_{\text{R}}$  (major) = 19.87 min,  $t_{\text{R}}$  (minor) = 26.75 min.

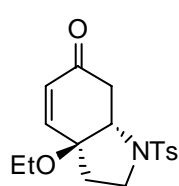

**(3aS,7aS)-3a-Ethoxy-1-tosyl-3,3a,7,7a-tetrahydro-1H-indol-6(2H)-one (4f)**

White solid, 89% yield, 90% *ee*.  $[\alpha]_{\text{D}}^{20} = +219.0^\circ$  ( $c = 0.5$ , acetone); Mp = 102.3-103.5  $^\circ\text{C}$ ;  $^1\text{H}$  NMR (300 MHz,  $\text{CDCl}_3$ )  $\delta$  0.68 (t,  $J = 6.9$  Hz, 3H), 2.09-2.15 (m, 2H), 2.43 (s, 3H), 2.56-2.65 (m, 1H), 2.80-2.85 (m, 1H), 3.07-3.18 (m, 2H), 3.40-3.45 (m, 1H), 3.67-3.72 (m, 1H), 4.08 (dd,  $J = 6.6, 10.5$  Hz, 1H), 6.07 (d,  $J = 10.2$  Hz, 1H), 6.66 (d,  $J = 10.2$  Hz, 1H), 7.33 (d,  $J = 8.1$  Hz, 2H), 7.75 (d,  $J = 8.1$  Hz, 2H);  $^{13}\text{C}$  NMR (75 MHz,  $\text{CDCl}_3$ )  $\delta$  14.9, 21.4, 35.5, 45.5, 47.5, 58.8, 60.1, 81.3, 127.5, 129.6, 131.4, 134.1, 143.7, 147.5, 196.4; IR (film) 2926, 1687, 1595, 1444, 1330, 1290, 1196, 1156, 1086, 1066, 1034, 1016, 810, 781, 737, 710, 660  $\text{cm}^{-1}$ ; HRMS (EI): Exact mass calcd for  $\text{C}_{17}\text{H}_{21}\text{NO}_4\text{S}$ : 335.1191. Found: 335.1197. The enantiomeric ratio was determined by Daicel Chiralcel OD-H (25 cm), Hexanes / IPA = 80 / 20, 1.0 mL/min $^{-1}$ ,  $\lambda = 220$  nm,  $t_{\text{R}}$  (major) = 18.44 min,  $t_{\text{R}}$  (minor) = 24.05 min.

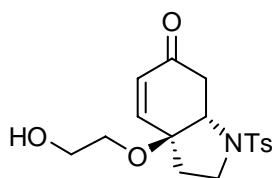

**(3aS,7aS)-3a-(2-Hydroxyethoxy)-1-tosyl-3,3a,7,7a-tetrahydro-1H-indol-6(2H)-one (4g)**

Yellow oil, 88% yield, 89% *ee*.  $[\alpha]_{\text{D}}^{20} = +279.4^\circ$  ( $c = 0.5$ , acetone);  $^1\text{H}$  NMR (300 MHz,  $\text{CDCl}_3$ )  $\delta$  1.88 (br, 1H), 2.14-2.20 (m, 2H), 2.44 (s, 3H), 2.53-2.62 (m, 1H), 2.96-3.12 (m, 2H), 3.19-3.32 (m, 3H), 3.44-3.47 (m, 1H), 3.63-3.66 (m, 1H), 4.12 (dd,  $J = 6.6, 10.8$  Hz, 1H), 6.09 (d,  $J = 10.5$  Hz, 1H), 6.72 (d,  $J = 10.5$  Hz, 1H), 7.34 (d,  $J = 8.4$  Hz, 2H), 7.74 (d,  $J = 8.4$  Hz, 2H);  $^{13}\text{C}$  NMR (75 MHz,  $\text{CDCl}_3$ )  $\delta$  21.4, 34.9, 45.1, 47.3, 60.9, 61.2, 64.8, 81.5, 127.5, 129.6, 131.4, 134.2, 144.0, 146.5, 196.0; IR (film) 3527, 2927, 1682, 1597, 1383, 1159, 1087, 1016, 908, 815, 729, 661  $\text{cm}^{-1}$ ; HRMS (EI): Exact mass calcd for

C<sub>17</sub>H<sub>21</sub>NO<sub>5</sub>S: 351.1140. Found: 351.1138. The enantiomeric ratio was determined by Daicel Chiralpak AD-H (25 cm), Hexanes / IPA = 80 / 20, 1.0 mL/min<sup>-1</sup>, λ = 220 nm, t<sub>R</sub> (major) = 20.32 min, t<sub>R</sub> (minor) = 23.52 min.

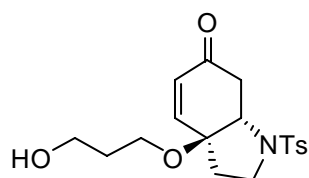

**(3aS,7aS)-3a-(3-Hydroxypropoxy)-1-tosyl-3,3a,7,7a-tetrahydro-1H-indol-6(2H)-one (4h)**

Colorless oil, 80% yield, 97% *ee*. [α]<sub>D</sub><sup>20</sup> = + 220.0° (*c* = 0.5, acetone).  
<sup>1</sup>H NMR (400 MHz, CDCl<sub>3</sub>) δ 1.36-1.39 (quintet, *J* = 6.0 Hz, 2H), 1.67 (br, 1H), 2.13-2.16 (m, 2H), 2.44 (s, 3H), 2.52-2.59 (m, 1H), 3.04-3.11 (m, 2H), 3.25-3.28 (m, 1H), 3.46-3.52 (m, 3H), 3.63-3.66 (m, 1H), 4.18 (dd, *J* = 6.4, 10.8 Hz, 1H), 6.10 (d, *J* = 10.4 Hz, 1H), 6.70 (d, *J* = 10.4 Hz, 1H), 7.34 (d, *J* = 8.0 Hz, 2H), 7.75 (d, *J* = 8.0 Hz, 2H); <sup>13</sup>C NMR (100 MHz, CDCl<sub>3</sub>) δ 21.5, 32.1, 35.6, 45.2, 47.3, 59.8, 60.0, 61.1, 81.6, 127.5, 129.7, 131.7, 134.7, 143.9, 147.2, 196.1; IR (film) 3541, 2951, 1681, 1597, 1475, 1444, 1384, 1340, 1159, 1086, 1066, 1032, 1015, 815, 777, 733, 710, 661 cm<sup>-1</sup>; HRMS (EI): Exact mass calcd for C<sub>18</sub>H<sub>23</sub>NO<sub>5</sub>S: 365.1297. Found: 365.1294. The enantiomeric ratio was determined by Daicel Chiralpak AD-H (25 cm), Hexanes / IPA = 80 / 20, 1.0 mL/min<sup>-1</sup>, λ = 220 nm, t<sub>R</sub> (major) = 19.65 min, t<sub>R</sub> (minor) = 27.47 min.

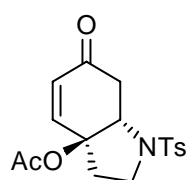

**(3aS,7aS)-6-Oxo-1-tosyl-2,3,3a,6,7,7a-hexahydro-1H-indol-3a-yl acetate (4i)**

White solid, 75% yield, 89% *ee*. [α]<sub>D</sub><sup>20</sup> = + 227.0° (*c* = 0.5, acetone); Mp = 159.6-160.8 °C; <sup>1</sup>H NMR (300 MHz, CDCl<sub>3</sub>) δ 1.46 (s, 3H), 2.24-2.31 (m, 1H), 2.40-2.44 (m, 1H), 2.43 (s, 3H), 2.60 (dd, *J* = 10.2, 17.1 Hz, 1H), 3.18 (dd, *J* = 7.5, 17.1 Hz, 1H), 3.34-3.39 (m, 1H), 3.73-3.79 (m, 1H), 4.46 (dd, *J* = 7.5, 10.2 Hz, 1H), 6.03 (d, *J* = 10.5 Hz, 1H), 6.81 (d, *J* = 10.5 Hz, 1H), 7.35 (d, *J* = 8.4 Hz, 2H), 7.74 (d, *J* = 8.4 Hz, 2H); <sup>13</sup>C NMR (75 MHz, CDCl<sub>3</sub>) δ 20.8, 21.4, 35.0, 44.8, 46.8, 62.4, 83.5, 127.7, 129.8, 133.9, 143.8, 144.5, 169.6, 195.2; IR (film) 3052, 2959, 2027, 2854, 2349, 1740, 1687, 1346, 1259, 1233, 1192, 1158, 1088, 1032, 817, 745, 663 cm<sup>-1</sup>; HRMS (MALDI): Exact mass calcd for C<sub>17</sub>H<sub>19</sub>NO<sub>5</sub>SNa: 372.0876. Found: 372.0880. The enantiomeric ratio was determined by Daicel Chiralcel OD-H (25 cm), Hexanes / IPA = 80 / 20, 1.0 mL/min<sup>-1</sup>, λ = 220 nm, t<sub>R</sub> (minor) = 26.30 min, t<sub>R</sub> (major) = 29.43 min.

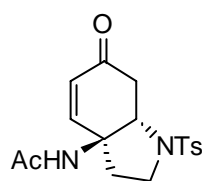

**N-((3aS,7aS)-6-oxo-1-tosyl-2,3,3a,6,7,7a-hexahydro-1H-indol-3a-yl)acetamide (4j)**

White solid, 70% yield, 99% *ee*.  $[\alpha]_D^{20} = +320.0^\circ$  ( $c = 0.5$ , CH<sub>3</sub>OH); Mp = 245.3-246.5 °C; <sup>1</sup>H NMR (300 MHz, CD<sub>3</sub>OD)  $\delta$  1.42 (s, 3H), 2.10-2.11 (m, 1H), 2.30-2.34 (m, 1H), 2.43 (s, 3H), 2.79 (dd,  $J = 9.9$ , 16.5 Hz, 1H), 2.93 (dd,  $J = 6.3$ , 16.5 Hz, 1H), 3.40-3.43 (m, 1H), 3.66-3.72 (m, 1H), 4.55 (dd,  $J = 6.3$ , 9.9 Hz, 1H), 5.95 (d,  $J = 10.2$  Hz, 1H), 6.60 (d,  $J = 10.2$  Hz, 1H), 7.41 (d,  $J = 8.4$  Hz, 2H), 7.70 (d,  $J = 8.4$  Hz, 2H); <sup>13</sup>C NMR (75 MHz, CD<sub>3</sub>OD)  $\delta$  21.4, 22.8, 35.5, 45.3, 47.9, 61.6, 63.4, 128.8, 129.6, 131.1, 135.4, 145.4, 150.9, 173.5, 198.7; IR (film) 3360, 1666, 1593, 1536, 1335, 1288, 1269, 1148, 1095, 1026, 1011, 931, 901, 846, 822, 796, 656 cm<sup>-1</sup>; HRMS (ESI): Exact mass calcd for C<sub>17</sub>H<sub>21</sub>N<sub>2</sub>O<sub>4</sub>S: 349.1217. Found: 349.1218. The enantiomeric ratio was determined by Daicel Chiralpak OJ-H (25 cm), Hexanes / IPA = 80 / 20, 1.0 mL/min<sup>-1</sup>,  $\lambda = 220$  nm,  $t_R$  (major) = 24.08 min,  $t_R$  (minor) = 50.55 min.

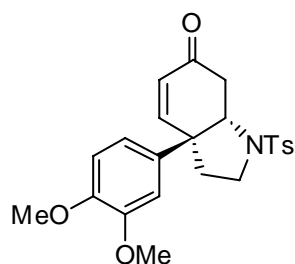

**(3aR,7aS)-3a-(3,4-Dimethoxyphenyl)-1-tosyl-3,3a,7,7a-tetrahydro-1H-indol-6(2H)-one (4k)**

Colorless oil, 91% yield, 97% *ee*.  $[\alpha]_D^{20} = +190.3^\circ$  ( $c = 0.6$ , acetone); <sup>1</sup>H NMR (300 MHz, CDCl<sub>3</sub>)  $\delta$  1.92-1.98 (m, 1H), 2.11-2.19 (m, 1H), 2.44 (s, 3H), 2.63 (dd,  $J = 3.6$ , 16.8 Hz, 1H), 3.10 (dd,  $J = 3.6$ , 16.8 Hz, 1H), 3.31-3.40 (m, 1H), 3.72-3.77 (m, 1H), 3.77 (s, 3H), 3.86 (s, 3H), 3.86-4.09 (m, 1H), 6.25 (d,  $J = 10.2$  Hz, 1H), 6.51 (d,  $J = 2.1$  Hz, 1H), 6.62 (d,  $J = 10.2$  Hz, 1H), 6.67-6.79 (m, 2H), 7.30 (d,  $J = 8.1$  Hz, 2H), 7.68 (d,  $J = 8.1$  Hz, 2H); <sup>13</sup>C NMR (75 MHz, CDCl<sub>3</sub>)  $\delta$  21.5, 36.9, 39.3, 48.0, 51.3, 55.8, 55.9, 65.9, 109.2, 111.2, 119.0, 127.4, 129.7, 130.4, 131.0, 134.8, 143.8, 148.7, 149.3, 149.8, 196.5; IR (film) 2962, 1685, 1596, 1517, 1463, 1412, 1334, 1258, 1158, 1097, 1023, 934, 847, 805, 728, 658 cm<sup>-1</sup>; HRMS (EI): Exact mass calcd for C<sub>23</sub>H<sub>25</sub>NO<sub>5</sub>S: 427.1453. Found: 427.1458. The enantiomeric ratio was determined by Daicel Chiralcel AD-H (25 cm), Hexanes / IPA = 80 / 20, 1.0 mL/min<sup>-1</sup>,  $\lambda = 220$  nm,  $t_R$  (major) = 26.65 min,  $t_R$  (minor) = 33.64 min.

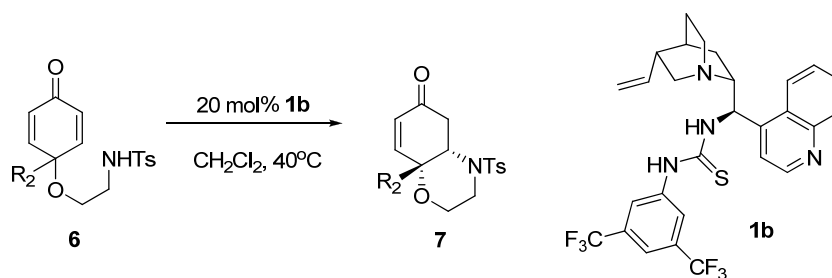

To a flame dried Schlenk flask were added compound **6** (0.2 mmol), CH<sub>2</sub>Cl<sub>2</sub> (0.2 mL) and catalyst **1b** (22.6 mg, 0.04 mmol). The mixture was stirred at 40°C until the starting material disappeared (monitored by TLC). The solvent was removed under reduced pressure, and the residue was purified by preparative TLC to afford product **7**.

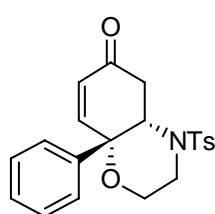

**(4aS,8aS)-8a-Phenyl-4-tosyl-3,4,4a,5-tetrahydro-2H-benzo[b][1,4]oxazin-6(8aH)-one (7a)**

Semisolid, 82% yield, 97 % *ee*. [ $\alpha$ ]<sub>D</sub><sup>20</sup> = + 142.0° (*c* = 0.5, acetone); <sup>1</sup>H NMR (300 MHz, CDCl<sub>3</sub>)  $\delta$  2.32 (dd, *J* = 4.2, 15.3 Hz, 1H), 2.43 (s, 3H), 3.07-3.25 (m, 2H), 3.33-3.38 (m, 1H), 3.65-3.73 (m, 2H), 5.12 (dd, *J* = 4.2, 13.2 Hz, 1H), 5.97 (d, *J* = 10.2 Hz, 1H), 6.66 (d, *J* = 10.2 Hz, 1H), 7.36-7.49 (m, 5H), 7.62-7.64 (m, 4H); <sup>13</sup>C NMR (75 MHz, CDCl<sub>3</sub>)  $\delta$  21.5, 35.7, 39.0, 50.6, 60.0, 74.5, 127.0, 127.1, 128.3, 128.4, 129.2, 130.0, 136.2, 139.0, 144.1, 150.3, 197.2; IR (film) 3057, 3029 2866, 1683, 1313, 1303, 1277, 1263, 1101, 1089, 1079, 971, 953, 908, 853, 812, 772, 759, 697, 671, 634, 619 cm<sup>-1</sup>; HRMS (EI): Exact mass calcd for C<sub>21</sub>H<sub>21</sub>NO<sub>4</sub>S: 383.1191. Found: 383.1195. The enantiomeric ratio was determined by Daicel Chiralpak AD-H (25 cm), Hexanes / IPA = 80 / 20, 1.0 mL/min<sup>-1</sup>,  $\lambda$  = 220 nm, *t*<sub>R</sub> (major) = 18.57 min, *t*<sub>R</sub> (minor) = 23.38 min.

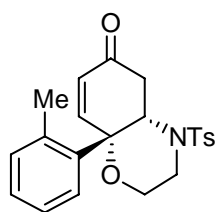

**(4aS,8aS)-8a-o-Tolyl-4-tosyl-3,4,4a,5-tetrahydro-2H-benzo[b][1,4]oxazin-6(8aH)-one (7b)**

White solid, 76% yield, 95% *ee*. [ $\alpha$ ]<sub>D</sub><sup>20</sup> = + 187.7° (*c* = 0.5, acetone); Mp = 167.5-168.4 °C; <sup>1</sup>H NMR (300 MHz, CDCl<sub>3</sub>)  $\delta$  2.31 (dd, *J* = 4.2, 15.6 Hz, 1H), 2.43 (s, 3H), 2.50 (s, 3H), 3.14-3.33 (m, 3H), 3.49-3.58 (m, 1H), 3.73 (dd, *J* = 3.3, 11.4 Hz, 1H), 5.12-5.23 (m, 1H), 6.02 (d, *J* = 10.2 Hz, 1H), 6.85 (d, *J* = 10.2 Hz, 1H), 7.28-7.33 (m, 5H), 7.66-7.71 (m, 3H); <sup>13</sup>C NMR (75 MHz, CDCl<sub>3</sub>)  $\delta$  21.5, 21.7, 35.7, 38.9, 51.7, 59.7, 75.8, 126.6,

127.3, 128.6, 128.8, 129.6, 130.0, 133.5, 135.7, 136.0, 137.1, 144.2, 148.6, 197.3; IR (film) 2960, 2921, 2861, 1689, 1380, 1337, 1327, 1155, 1114, 1087, 1070, 1041, 977, 964, 949, 908, 855, 813, 766, 657, 625  $\text{cm}^{-1}$ ; HRMS (EI): Exact mass calcd for  $\text{C}_{22}\text{H}_{23}\text{NO}_4\text{S}$ : 397.1348. Found: 397.1354. The enantiomeric ratio was determined by Daicel Chiralpak IC (25 cm), Hexanes / IPA = 80 / 20, 1.0  $\text{mL}/\text{min}^{-1}$ ,  $\lambda = 220 \text{ nm}$ ,  $t_{\text{R}}$  (minor) = 94.27 min,  $t_{\text{R}}$  (major) = 114.81 min.

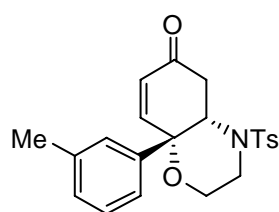

**(4aS,8aS)-8a-m-tolyl-4-tosyl-3,4,4a,5-tetrahydro-2H-benzo[b][1,4]oxazin-6(8aH)-one (7c)**

White solid, 79% yield, 98% *ee*.  $[\alpha]_{\text{D}}^{20} = +141.4^{\circ}$  ( $c = 0.5$ , acetone); Mp = 147.6-148.8  $^{\circ}\text{C}$ ;  $^1\text{H}$  NMR (300 MHz,  $\text{CDCl}_3$ )  $\delta$  2.30-2.37 (m, 1H), 2.40 (s, 3H), 2.43 (s, 3H), 3.08-3.26 (m, 2H), 3.31-3.36 (m, 1H), 3.70-3.72 (m, 2H), 5.10 (dd,  $J = 4.2, 12.0 \text{ Hz}$ , 1H), 5.96 (d,  $J = 10.2 \text{ Hz}$ , 1H), 6.65 (d,  $J = 10.2 \text{ Hz}$ , 1H), 7.18 (d,  $J = 6.9 \text{ Hz}$ , 1H), 7.29-7.43 (m, 5H), 7.63 (d,  $J = 8.4 \text{ Hz}$ , 2H);  $^{13}\text{C}$  NMR (75 MHz,  $\text{CDCl}_3$ )  $\delta$  21.5, 21.6, 35.8, 39.0, 50.7, 60.1, 74.5, 124.0, 127.2, 127.6, 128.3, 129.1, 129.2, 130.0, 136.3, 138.9, 139.0, 144.0, 150.4, 197.4; IR (film) 2960, 2926, 2851, 1687, 1607, 1449, 1319, 1291, 1260, 1188, 1157, 1105, 1088, 1077, 1050, 1016, 976, 787, 772, 703, 687  $\text{cm}^{-1}$ ; HRMS (EI): Exact mass calcd for  $\text{C}_{22}\text{H}_{23}\text{NO}_4\text{S}$ : 397.1348. Found: 397.1347. The enantiomeric ratio was determined by Daicel Chiralpak AD-H (25 cm), Hexanes / IPA = 80 / 20, 0.3  $\text{mL}/\text{min}^{-1}$ ,  $\lambda = 214 \text{ nm}$ ,  $t_{\text{R}}$  (major) = 60.24 min,  $t_{\text{R}}$  (minor) = 63.35 min.

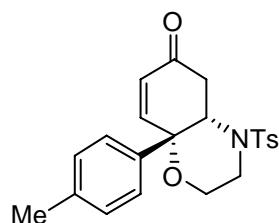

**(4aS,8aS)-8a-p-Tolyl-4-tosyl-3,4,4a,5-tetrahydro-2H-benzo[b][1,4]oxazin-6(8aH)-one (7d)**

White solid, 96% yield, 96% *ee*.  $[\alpha]_{\text{D}}^{20} = +190.0^{\circ}$  ( $c = 0.5$ , acetone); Mp = 151.2-152.1  $^{\circ}\text{C}$ ;  $^1\text{H}$  NMR (300 MHz,  $\text{CDCl}_3$ )  $\delta$  2.30 (dd,  $J = 3.9, 15.6 \text{ Hz}$ , 1H), 2.38 (s, 3H), 2.43 (s, 3H), 3.06-3.23 (m, 2H), 3.33-3.37 (m, 1H), 3.68-3.71 (m, 2H), 5.08 (dd,  $J = 4.2, 12.3 \text{ Hz}$ , 1H), 5.94 (d,  $J = 9.9 \text{ Hz}$ , 1H), 6.64 (d,  $J = 9.9 \text{ Hz}$ , 1H), 7.24-7.30 (m, 4H), 7.50 (d,  $J = 8.1 \text{ Hz}$ , 2H), 6.63 (d,  $J = 8.4 \text{ Hz}$ , 2H);  $^{13}\text{C}$  NMR (75 MHz,  $\text{CDCl}_3$ )  $\delta$  21.0, 21.5, 35.7, 39.0, 50.6, 59.9, 74.4, 126.9, 127.1, 128.1, 129.9, 130.0, 135.8, 136.3, 138.2, 144.0, 150.4, 197.3; IR (film) 2910, 2864, 1693, 1379, 1327, 1265, 1151, 1106, 1093, 1074, 992, 972, 917, 821, 810, 798, 764, 706, 659  $\text{cm}^{-1}$ ; HRMS (EI): Exact mass calcd for

C<sub>22</sub>H<sub>23</sub>NO<sub>4</sub>S: 397.1348. Found: 397.1352. The enantiomeric ratio was determined by Daicel Chiralpak AD-H (25 cm), Hexanes / IPA = 80 / 20, 1.0 mL/min<sup>-1</sup>, λ = 220 nm, t<sub>R</sub> (major) = 13.54 min, t<sub>R</sub> (minor) = 31.06 min.

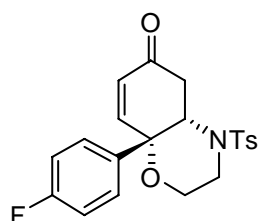

**(4aS,8aS)-8a-(4-Fluorophenyl)-4-tosyl-3,4,4a,5-tetrahydro-2H-benzob[1,4]oxazin-6(8aH)-one (7e)**

White solid, 97% yield, 98% *ee*. [ $\alpha$ ]<sub>D</sub><sup>20</sup> = + 134.5° (*c* = 0.5, acetone); Mp = 73.4-74.6 °C; <sup>1</sup>H NMR (300 MHz, CDCl<sub>3</sub>) δ 2.28 (dd, *J* = 4.2, 15.6 Hz, 1H), 2.44 (s, 3H), 3.04-3.23 (m, 2H), 3.38-3.43 (m, 1H), 3.62-3.74 (m, 2H), 5.06 (dd, *J* = 4.2, 12.6 Hz, 1H), 5.97 (d, *J* = 10.2 Hz, 1H), 6.62 (d, *J* = 10.2 Hz, 1H), 7.11-7.27 (m, 2H), 7.31 (d, *J* = 8.1 Hz, 2H), 7.59-7.65 (m, 4H); <sup>13</sup>C NMR (75 MHz, CDCl<sub>3</sub>) δ 21.5, 35.6, 39.0, 50.7, 60.0, 74.2, 116.2 (d, *J* = 20.9 Hz), 127.1, 128.5, 129.0 (d, *J* = 8.6 Hz), 130.1, 134.7 (d, *J* = 3.1 Hz), 136.2, 144.2, 150.0, 162.5 (d, *J* = 247.1 Hz), 197.0; <sup>19</sup>F NMR (282 MHz, CDCl<sub>3</sub>) δ -113.59; IR (film) 2963, 2925, 2873, 1687, 1599, 1508, 1337, 1262, 1224, 1156, 1101, 1086, 1045, 1016, 962, 910, 858, 835, 679, 653 cm<sup>-1</sup>; HRMS (EI): Exact mass calcd for C<sub>21</sub>H<sub>20</sub>NO<sub>4</sub>FS: 401.1097. Found: 401.1102. The enantiomeric ratio was determined by Daicel Chiralpak AD-H (25 cm), Hexanes / IPA = 80 / 20, 1.0 mL/min<sup>-1</sup>, λ = 220 nm, t<sub>R</sub> (major) = 16.03 min, t<sub>R</sub> (minor) = 22.72 min.

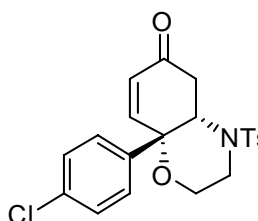

**(4aS,8aS)-8a-(4-Chlorophenyl)-4-tosyl-3,4,4a,5-tetrahydro-2H-benzob[1,4]oxazin-6(8aH)-one (7f)**

White solid, 96% yield, 96% *ee*. [ $\alpha$ ]<sub>D</sub><sup>20</sup> = + 162.6° (*c* = 0.5, acetone); Mp = 207.6-208.4 °C; <sup>1</sup>H NMR (300 MHz, CDCl<sub>3</sub>) δ 2.28 (dd, *J* = 4.2, 15.3 Hz, 1H), 2.45 (s, 3H), 3.04-3.24 (m, 2H), 3.39-3.44 (m, 1H), 3.65-3.75 (m, 2H), 5.04 (dd, *J* = 4.2, 12.6 Hz, 1H), 5.97 (d, *J* = 10.2 Hz, 1H), 6.58 (d, *J* = 10.2 Hz, 1H), 7.31 (d, *J* = 8.1 Hz, 2H), 7.42 (d, *J* = 8.4 Hz, 2H), 7.56 (d, *J* = 8.4 Hz, 2H), 7.63 (d, *J* = 8.1 Hz, 2H); <sup>13</sup>C NMR (75 MHz, CDCl<sub>3</sub>) δ 21.6, 35.6, 38.9, 50.7, 60.1, 74.2, 127.0, 128.5, 128.7, 129.5, 130.1, 134.4, 136.2, 137.6, 144.3, 149.7, 197.0; IR (film) 2911, 2865, 1692, 1487, 1456, 1378, 1327, 1299, 1265, 1249, 1153, 1107, 1092, 1072, 1046, 1010, 991, 971, 915, 738, 708 cm<sup>-1</sup>; HRMS (EI): Exact mass calcd for C<sub>21</sub>H<sub>20</sub>NO<sub>4</sub>SCl: 417.0802. Found: 417.0799. The enantiomeric ratio was determined by Daicel Chiralpak AD-H (25 cm), Hexanes / IPA = 80 / 20, 1.0 mL/min<sup>-1</sup>, λ = 220 nm, t<sub>R</sub> (major) = 18.00



min,  $t_R$  (minor) = 30.87 min.

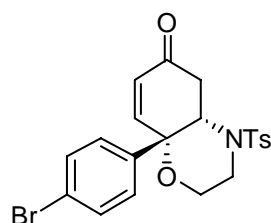

**(4aS,8aS)-8a-(4-Bromophenyl)-4-tosyl-3,4,4a,5-tetrahydro-2H-benzo[b][1,4]oxazin-6(8aH)-one (7g)**

White solid, 84% yield, 93% *ee*.  $[\alpha]_D^{20} = +140.6^\circ$  ( $c = 0.5$ , acetone); Mp = 233.1-234.3 °C;  $^1\text{H}$  NMR (300 MHz,  $\text{CDCl}_3$ )  $\delta$  2.28 (dd,  $J = 3.9$ , 15.6 Hz, 1H), 2.45 (s, 3H), 3.04-3.22 (m, 2H), 3.39-3.44 (m, 1H), 3.61-3.76 (m, 2H), 5.03 (dd,  $J = 4.2$ , 12.3 Hz, 1H), 5.97 (d,  $J = 10.2$  Hz, 1H), 6.58 (d,  $J = 10.2$  Hz, 1H), 7.31 (d,  $J = 7.8$  Hz, 2H), 7.49 (d,  $J = 8.1$  Hz, 2H), 7.56-7.64 (m, 4H);  $^{13}\text{C}$  NMR (75 MHz,  $\text{CDCl}_3$ )  $\delta$  21.5, 35.5, 38.9, 50.6, 60.1, 74.3, 122.6, 127.0, 128.7, 128.8, 130.1, 132.4, 136.2, 138.1, 144.2, 149.6, 197.0; IR (film) 3058, 2948, 2912, 2865, 1691, 1378, 1327, 1299, 1267, 1250, 1153, 1108, 1092, 1073, 1046, 990, 823, 651,  $\text{cm}^{-1}$ ; HRMS (EI): Exact mass calcd for  $\text{C}_{21}\text{H}_{20}\text{NO}_4\text{SBr}$ : 461.0296. Found: 461.0297. The enantiomeric ratio was determined by Daicel Chiralpak AD-H (25 cm), Hexanes / IPA = 80 / 20, 1.0 mL/min $^{-1}$ ,  $\lambda = 220$  nm,  $t_R$  (major) = 18.13 min,  $t_R$  (minor) = 31.64 min.

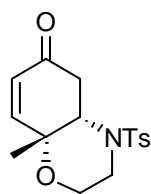

**(4aS,8aR)-8a-methyl-4-tosyl-3,4,4a,5-tetrahydro-2H-benzo[b][1,4]oxazin-6(8aH)-one (7h)**

White solid, 96% yield, 97% *ee*.  $[\alpha]_D^{20} = +49.0^\circ$  ( $c = 0.5$ , acetone); Mp = 171.6-172.4 °C;  $^1\text{H}$  NMR (300 MHz,  $\text{CDCl}_3$ )  $\delta$  1.56 (s, 3H), 2.05-2.11 (m, 1H), 2.45 (s, 3H), 2.84-2.93 (m, 1H), 3.13-3.10 (m, 1H), 3.62-3.76 (m, 2H), 3.91-3.99 (m, 1H), 4.07-4.13 (m, 1H), 6.02 (d,  $J = 10.2$  Hz, 1H), 6.66 (d,  $J = 10.2$  Hz, 1H), 7.33 (d,  $J = 8.1$  Hz, 2H), 7.67 (d,  $J = 8.1$  Hz, 2H);  $^{13}\text{C}$  NMR (75 MHz,  $\text{CDCl}_3$ )  $\delta$  21.2, 21.5, 35.3, 38.8, 53.8, 59.5, 69.3, 126.8, 129.4, 130.1, 137.0, 144.0, 149.4, 197.5; IR (film) 2924, 2854, 1680, 1368, 1275, 1153, 1119, 1009, 880, 848, 824, 802, 790, 769, 708, 662  $\text{cm}^{-1}$ ; HRMS (EI): Exact mass calcd for  $\text{C}_{16}\text{H}_{19}\text{NO}_4\text{S}$ : 321.1035. Found: 321.1036. The enantiomeric ratio was determined by Daicel Chiralcel OD-H (25 cm), Hexanes / IPA = 80 / 20, 1.0 mL/min $^{-1}$ ,  $\lambda = 220$  nm,  $t_R$  (major) = 12.44 min,  $t_R$  (minor) = 17.29 min.

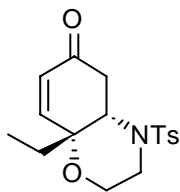

**(4aS,8aR)-8a-Ethyl-4-tosyl-3,4,4a,5-tetrahydro-2H-benzo[b][1,4]oxazin-6-one (7i)**

Yellow oil, 97% yield, 97% *ee*.  $[\alpha]_{\text{D}}^{20} = +58.6^{\circ}$  ( $c = 0.5$ , acetone);  $^1\text{H}$  NMR (300 MHz,  $\text{CDCl}_3$ )  $\delta$  0.89 (t,  $J = 7.5$  Hz, 3H), 1.91 (q,  $J = 7.5$  Hz, 2H), 2.01-2.08 (m, 1H), 2.41 (s, 3H), 2.84-2.93 (m, 1H), 3.07-3.13 (m, 1H), 3.58-3.70 (m, 2H), 3.81-3.86 (m, 1H), 4.14 (dd,  $J = 4.2, 12.6$  Hz, 1H), 6.03 (d,  $J = 10.2$  Hz, 1H), 6.68 (d,  $J = 10.2$  Hz, 1H), 7.30 (d,  $J = 8.7$  Hz, 2H), 7.64 (d,  $J = 8.7$  Hz, 2H);  $^{13}\text{C}$  NMR (75 MHz,  $\text{CDCl}_3$ )  $\delta$  7.04, 21.5, 24.7, 35.2, 38.4, 51.6, 59.4, 71.6, 126.7, 130.0, 130.4, 136.9, 143.9, 147.7, 197.6; IR (film) 2970, 2937, 2880, 1686, 1456, 1337, 1273, 1154, 1119, 1081, 1030, 975, 948, 922, 815, 766, 690  $\text{cm}^{-1}$ ; HRMS (EI): Exact mass calcd for  $\text{C}_{17}\text{H}_{21}\text{NO}_4\text{S}$ : 335.1191. Found: 335.1195. The enantiomeric ratio was determined by Daicel Chiralcel OD-H (25 cm), Hexanes / IPA = 80 / 20, 1.0 mL/min $^{-1}$ ,  $\lambda = 220$  nm,  $t_{\text{R}}$  (major) = 17.84 min,  $t_{\text{R}}$  (minor) = 24.73 min.

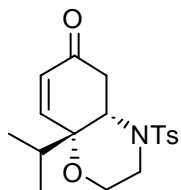

**(4aS,8aR)-8a-iso-Propyl-4-tosyl-3,4,4a,5-tetrahydro-2H-benzo[b][1,4]oxazin-6-one (7j)**

Yellow oil, 73% yield, 96% *ee*.  $[\alpha]_{\text{D}}^{20} = +47.8^{\circ}$  ( $c = 0.5$ , acetone);  $^1\text{H}$  NMR (300 MHz,  $\text{CDCl}_3$ )  $\delta$  0.87 (d,  $J = 6.9$  Hz, 3H), 1.03 (d,  $J = 6.9$  Hz, 3H), 2.05 (dd,  $J = 4.8, 15.3$  Hz, 1H), 2.45 (s, 3H), 2.83 (heptet,  $J = 6.9$  Hz, 1H), 2.89-2.98 (m, 1H), 3.14-3.19 (m, 1H), 3.64-3.71 (m, 2H), 3.83-3.89 (m, 1H), 4.39 (dd,  $J = 4.5, 12.9$  Hz, 1H), 6.12 (d,  $J = 10.2$  Hz, 1H), 6.71 (d,  $J = 10.2$  Hz, 1H), 7.33 (d,  $J = 8.1$  Hz, 2H), 7.67 (d,  $J = 8.1$  Hz, 2H);  $^{13}\text{C}$  NMR (75 MHz,  $\text{CDCl}_3$ )  $\delta$  14.5, 17.6, 21.5, 25.7, 35.4, 38.3, 50.4, 59.2, 73.8, 126.8, 130.1, 131.6, 137.0, 144.0, 145.2, 197.7; IR (film) 2964, 2933, 2878, 1711, 1686, 1348, 1336, 1263, 1155, 1118, 1091, 1078, 1050, 1025, 969, 953, 929, 815, 767, 684, 656, 612  $\text{cm}^{-1}$ ; HRMS (EI): Exact mass calcd for  $\text{C}_{18}\text{H}_{23}\text{NO}_4\text{S}$ : 349.1348. Found: 349.1359. The enantiomeric ratio was determined by Daicel Chiralcel OD-H (25 cm), Hexanes / IPA = 80 / 20, 1.0 mL/min $^{-1}$ ,  $\lambda = 220$  nm,  $t_{\text{R}}$  (major) = 8.84 min,  $t_{\text{R}}$  (minor) = 10.38 min.

### 3 Derivatization of the aza-Michael adducts

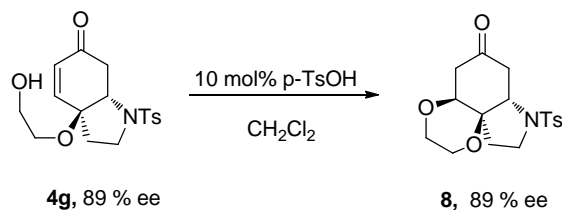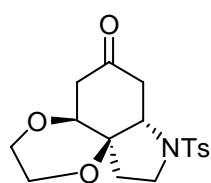

#### (4<sup>R</sup>,7a<sup>S</sup>,10a<sup>S</sup>)-7-tosyloctahydro-[1,4]dioxino[2,3-d]indol-9(5H)-one (**8**)

To a solution of **4g** (17.6 mg, 0.05 mmol, 89% *ee*) in CH<sub>2</sub>Cl<sub>2</sub> (1 mL) was added *p*-TsOH (1 mg, 0.005 mmol). After the reaction was stirred for 5 min, the solvent was removed and the residue was purified by preparative TLC (CH<sub>2</sub>Cl<sub>2</sub>/ EtOH =30/1) to provide **8**. White solid, 92% yield, 89% *ee*. [ $\alpha$ ]<sub>D</sub><sup>20</sup> = + 79.0° (*c* = 0.5, acetone); Mp = 162.2-163.1 °C; <sup>1</sup>H NMR (300 MHz, CDCl<sub>3</sub>)  $\delta$  1.86-1.92 (m, 1H), 2.14-2.24 (m, 1H), 2.43 (s, 3H), 2.43-2.51 (m, 1H), 2.61-2.67 (m, 2H), 3.03-3.13 (m, 2H), 3.20-3.29 (m, 1H), 3.34-3.43 (m, 1H), 3.50-3.58 (m, 1H), 3.62-3.70 (m, 2H), 3.86-3.88 (m, 1H), 4.15-4.20 (m, 1H), 7.33 (d, *J* = 8.1 Hz, 2H), 7.74 (d, *J* = 8.1 Hz, 2H); <sup>13</sup>C NMR (75 MHz, CDCl<sub>3</sub>)  $\delta$  21.5, 33.4, 43.2, 46.1, 46.7, 58.1, 60.3, 66.6, 75.2, 80.4, 127.6, 129.6, 134.2, 143.7, 204.6; IR (film) 2956, 1718, 1596, 1446, 1337, 1304, 1189, 1104, 1086, 1040, 1025, 997, 972, 905, 813, 723, 707, 662 cm<sup>-1</sup>; HRMS (EI): Exact mass calcd for C<sub>17</sub>H<sub>21</sub>NO<sub>5</sub>S: 351.1140. Found: 351.1146. The enantiomeric ratio was determined by Daicel Chiralpak AD-H (25 cm), Hexanes / IPA = 80 / 20, 1.0 mL/min<sup>-1</sup>,  $\lambda$  = 220 nm, *t*<sub>R</sub> (major) = 22.15 min, *t*<sub>R</sub> (minor) = 27.05 min

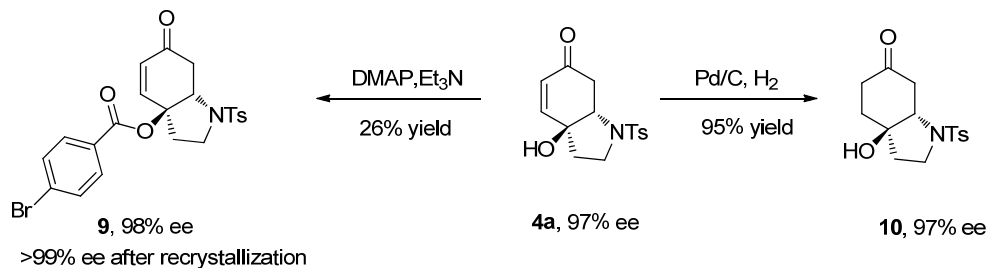

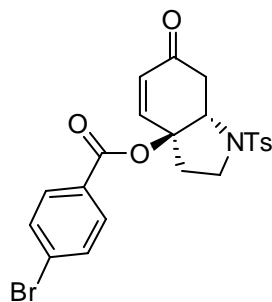

**(3aS,7aS)-6-oxo-1-tosyl-2,3,3a,6,7,7a-hexahydro-1H-indol-3a-yl  
4-bromobenzoate (9)**

To a solution of **4a** (20 mg, 0.065 mmol, 97% *ee*) and 4-bromobenzoyl chloride (38 mg, 0.174 mmol) in CH<sub>2</sub>Cl<sub>2</sub> (1 mL) were added DMAP (1.5 mg, 0.013 mmol) and Et<sub>3</sub>N (18 mg, 0.18 mmol). The reaction mixture was stirred at room temperature for 5h. The mixture was then quenched with water and extracted with CH<sub>2</sub>Cl<sub>2</sub>. The organic layer was washed with brine and dried over anhydrous Na<sub>2</sub>SO<sub>4</sub>. The solvent was removed under reduced pressure and the residue was purified by silica gel column chromatography (PE/ EtOAc =2/1) to provide **9** (8.4 mg, 26% yield). White solid, 26% yield, 98% *ee* (>99% *ee* after one recrystallization). Analytical data for **9** (99% *ee*): [ $\alpha$ ]<sub>D</sub><sup>20</sup> = + 138.0° (*c* = 0.5, acetone); Mp = 245.6-246.7°C; <sup>1</sup>H NMR (300 MHz, CDCl<sub>3</sub>)  $\delta$  2.01 (s, 3H), 2.37-2.44 (m, 1H), 2.50-2.57 (m, 1H), 2.63-2.72 (m, 1H), 3.31 (dd, *J* = 6.9, 17.1 Hz, 1H), 3.40-3.49 (m, 1H), 3.86-3.92 (m, 1H), 4.75 (dd, *J* = 7.5, 10.2 Hz, 1H), 6.10 (d, *J* = 10.2 Hz, 1H), 6.78 (d, *J* = 10.2 Hz, 1H), 6.93 (d, *J* = 8.1 Hz, 2H), 7.40 (d, *J* = 8.7 Hz, 2H), 7.48 (d, *J* = 8.7 Hz, 2H), 7.59 (d, *J* = 8.1 Hz, 2H); <sup>13</sup>C NMR (75 MHz, CDCl<sub>3</sub>)  $\delta$  21.3, 35.7, 45.5, 47.0, 62.2, 84.3, 127.2, 127.7, 128.8, 129.6, 129.8, 130.8, 131.6, 133.4, 143.7, 144.6, 164.0, 195.1; IR (film) 2961, 2923, 2853, 1709, 1680, 1586, 1388, 1340, 1283, 1258, 1160, 1090, 1048, 1033, 1008, 938, 854, 846, 755, 664 cm<sup>-1</sup>; HRMS (MALDI): Exact mass calcd for C<sub>22</sub>H<sub>20</sub>NO<sub>5</sub>SBrNa: 512.0138. Found: 512.1023. The enantiomeric ratio was determined by Daicel Chiralcel OD-H (25 cm), Hexanes / IPA = 80 / 20, 1.0 mL/min<sup>-1</sup>,  $\lambda$  = 220 nm, *t<sub>R</sub>* (major) = 32.00 min, *t<sub>R</sub>* (minor) = 43.83 min.

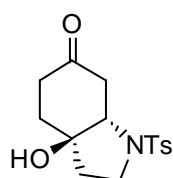

**(3aR,7aS)-3a-hydroxy-1-tosylhexahydro-1H-indol-6(2H)-one (10)**

To a solution of **4a** (80 mg, 0.26 mmol, 97% *ee*) in MeOH (2 mL) under argon, 5% Pd/C (4 mg) was added. Then the reaction was charged with 1 atm of hydrogen, the reaction mixture was stirred at room temperature for 10 h. The reaction mixture was filtered through a pad of celite, washed with methanol. The filtrate was concentrated under reduced pressure. The crude product was purified by silica gel column chromatography (CH<sub>2</sub>Cl<sub>2</sub>/ EtOH =30/1) to provide compound **10**. White solid, 95% yield, 97% *ee*. [ $\alpha$ ]<sub>D</sub><sup>20</sup> = + 194.3° (*c* = 0.5, acetone); Mp = 127.5-128.2 °C; <sup>1</sup>H NMR (300 MHz, CDCl<sub>3</sub>)  $\delta$

1.87-2.07 (m, 5H), 2.30-2.54 (m, 3H), 2.43 (s, 3H), 2.91-2.98 (m, 1H), 3.21-3.30 (m, 1H), 3.50-3.55 (m, 2H), 7.32 (d,  $J = 8.1$  Hz, 2H), 7.70 (d,  $J = 8.1$  Hz, 2H);  $^{13}\text{C}$  NMR (75 MHz,  $\text{CDCl}_3$ )  $\delta$  21.5, 32.6, 35.4, 37.0, 45.1, 47.1, 65.4, 78.3, 127.7, 130.0, 132.9, 143.9, 209.7; IR (film) 3492, 2931, 2880, 1720, 1595, 1320, 1154, 1120, 1086, 1042, 1015, 995, 981, 942, 863, 734, 706, 662  $\text{cm}^{-1}$ ; HRMS (EI): Exact mass calcd for  $\text{C}_{15}\text{H}_{19}\text{NO}_4\text{S}$ : 309.1035. Found: 309.1032. The enantiomeric ratio was determined by Daicel Chiralpak AD-H (25 cm), Hexanes / IPA = 80 / 20,  $1.0 \text{ mL/min}^{-1}$ ,  $\lambda = 220 \text{ nm}$ ,  $t_{\text{R}}$  (minor) = 15.98 min,  $t_{\text{R}}$  (major) = 45.90 min.

#### 4 Total synthesis of (-)-Mesembrine

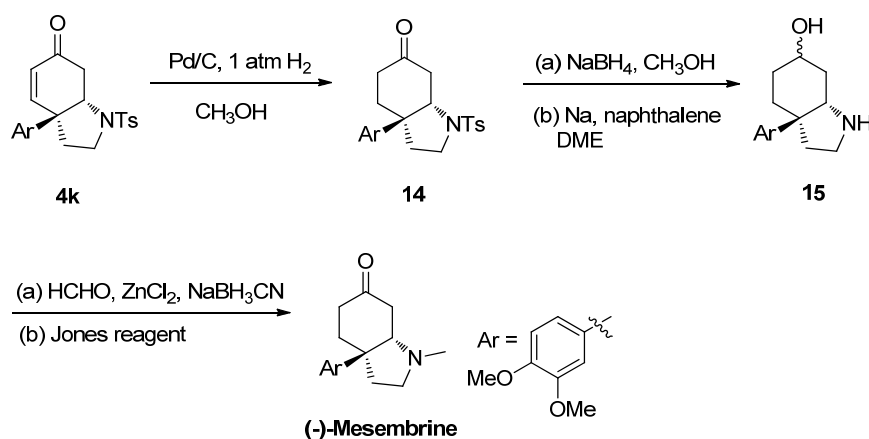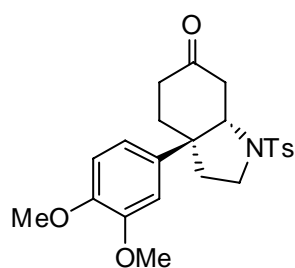

**(3aS,7aS)-3a-(3,4-Dimethoxyphenyl)-1-tosylhexahydro-1H-indol-6(2H)-one (14)**

To a solution of **4k** (33.6 mg, 0.079 mmol) in MeOH (2 mL) under argon, 10% Pd/C (3.4 mg) was added. Then the reaction was charged with 1 atm of hydrogen, the reaction mixture was stirred at room temperature for 10h. The reaction mixture was filtered through a pad of celite, washed with methanol. The filtrate was concentrated under reduced pressure. The crude product was purified by preparative TLC (PE: EtOAc = 3:1) to provide compound **14** (30.7 mg, 91% yield, 97% *ee*).  $[\alpha]_{\text{D}}^{20} = +71.6.0^\circ$  ( $c = 0.5$ , acetone);  $^1\text{H}$  NMR (300 MHz,  $\text{CDCl}_3$ )  $\delta$  2.06-2.21 (m, 6H), 2.40 (s, 3H), 2.93 (d,  $J = 6.3$  Hz, 2H), 3.31-3.35 (m, 1H), 3.54-3.56 (m, 1H), 3.81 (s, 3H), 3.85 (s, 3H), 4.30 (t,  $J = 6.3$  Hz, 1H), 6.56-6.66 (m, 3H), 7.22 (d,  $J = 8.1$  Hz, 2H), 7.61 (d,  $J = 8.1$  Hz, 2H);  $^{13}\text{C}$  NMR (75 MHz,  $\text{CDCl}_3$ )  $\delta$  21.3, 33.1, 36.1, 36.7, 44.8, 46.8, 48.6, 55.6, 55.7, 63.1, 109.1, 110.5,

117.5, 127.2, 129.4, 134.1, 136.0, 143.5, 147.7, 148.9, 209.4; IR (film) 2931, 1715, 1588, 1514, 1438, 1329, 1255, 1149, 1086, 1024, 882, 809, 794, 704  $\text{cm}^{-1}$ ; HRMS (EI): Exact mass calcd for  $\text{C}_{23}\text{H}_{27}\text{NO}_5\text{S}$ : 429.1610. Found: 429.1615. The enantiomeric ratio was determined by Daicel Chiralcel AD-H (25 cm), Hexanes / IPA = 80 / 20, 1.0  $\text{mL}/\text{min}^{-1}$ ,  $\lambda$  = 220 nm,  $t_R$  (major) = 33.18 min,  $t_R$  (minor) = 40.49 min.

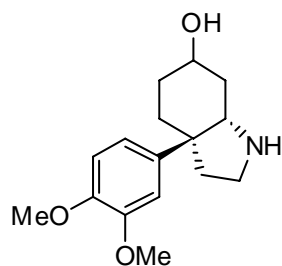

**(3aS,7aS)-3a-(3,4-Dimethoxyphenyl)octahydro-1H-indol-6-ol (15)**

To a solution of **14** (14.5 mg, 0.034 mmol) in MeOH (2 mL) was added  $\text{NaBH}_4$  (2.6 mg, 0.068 mmol) at 0  $^\circ\text{C}$ . The reaction was stirred for 10 min and quenched with water. The mixture was extracted with EtOAc for three times. The combined organic layer was washed with brine, dried over anhydrous  $\text{Na}_2\text{SO}_4$ . The solvent was removed under reduced pressure and the residue was purified by silica gel column chromatography (PE/ EtOAc = 1/2) to provide the alcohol (12.7 mg, 88% yield).

To a solution of naphthalene (64 mg, 0.50 mmol) in DME (1 mL) was added sodium (11 mg, 0.48 mmol). The mixture was stirred at room temperature for 3 h. Then a solution of the above obtained alcohol (21 mg, 0.049 mmol) in DME (0.5 mL) was added dropwise at  $-78$   $^\circ\text{C}$ . The reaction was quenched with saturated  $\text{NaHCO}_3$  (0.5 mL), dried over  $\text{Na}_2\text{SO}_4$  and concentrated. Purification of the residue via a short silica gel column chromatography (PE: EtOAc = 10 :1~  $\text{CH}_2\text{Cl}_2/\text{CH}_3\text{OH}/\text{NEt}_3$  = 3:1:0.5) provided **15** as a colorless oil (12.1 mg, 89% yield).  $^1\text{H}$  NMR (300 MHz,  $\text{CDCl}_3$ )  $\delta$  1.34-1.35 (m, 1H), 1.68-2.29 (m, 7H), 3.04-3.19 (m, 2H), 3.74 (s, 1H), 3.82 (s, 3H), 3.83 (s, 3H), 3.96 (s, 1H), 5.50 (br, 2H), 6.75-6.84 (m, 3H);  $^{13}\text{C}$  NMR (75 MHz,  $\text{CDCl}_3$ )  $\delta$  25.9, 28.9, 30.8, 41.5, 42.3, 46.2, 55.6, 55.8, 60.4, 66.0, 110.0, 110.6, 118.3, 136.9, 147.1, 148.6; IR (film) 2933, 1669, 1588, 1518, 1463, 1409, 1248, 1148, 1098, 1024, 921, 853, 805, 765, 730  $\text{cm}^{-1}$ ; HRMS (MALDI): Exact mass calcd for  $\text{C}_{16}\text{H}_{24}\text{NO}_3$ : 278.1749. Found: 278.1751.

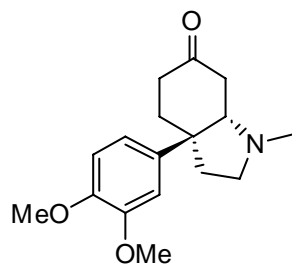

**(-)- Mesembrine**

To a solution of **15** (12.1 mg, 0.044 mmol) in CH<sub>3</sub>OH (1 mL) was added 37% aqueous HCHO (13  $\mu$ L, 0.13 mmol), ZnCl<sub>2</sub> (3.5 mg, 0.026 mmol) and NaBH<sub>3</sub>CN (4 mg, 0.063 mmol) at room temperature. The reaction was stirred for 10 min and quenched with 0.1 N NaOH (0.5 mL). Methanol was removed under reduced pressure and the residue was extracted with ether. The organic layer was washed with brine, dried over anhydrous Na<sub>2</sub>SO<sub>4</sub>. The solvent was removed and the residue was purified by silica gel column chromatography (CH<sub>2</sub>Cl<sub>2</sub>/ CH<sub>3</sub>OH =6/1) to provide N-methyl product.

To a solution of the above obtained *N*-methyl product in acetone (1 mL) was added Jones reagent (13  $\mu$ L) at 0 °C. The reaction was stirred at room temperature for 10 min and quenched with 0.1 N NaOH (1 mL). The mixture was extracted with ether. The combined organic layer was washed with brine, dried over anhydrous Na<sub>2</sub>SO<sub>4</sub>. The solvent was removed and the residue was purified by preparative TLC (CH<sub>2</sub>Cl<sub>2</sub>/ acetone = 2/1) to provide **(-)-Mesembrine** (5.4 mg, 45% yield over two steps). Analytical data for **(-)- Mesembrine** (98 % *ee*): [ $\alpha$ ]<sub>D</sub><sup>20</sup> = -61.0 ° (*c* = 0.2, CH<sub>3</sub>OH); <sup>1</sup>H NMR (300 MHz, CDCl<sub>3</sub>)  $\delta$  2.08-2.25 (m, 5H), 2.33 (s, 3H), 2.30-2.46 (m, 2H), 2.62 (d, *J* = 3.3 Hz, 2H), 2.96-2.98 (m, 1H), 3.13-3.18 (m, 1H), 3.89 (s, 3H), 3.91 (s, 3H), 6.84-6.95 (m, 3H); <sup>13</sup>C NMR (75 MHz, CDCl<sub>3</sub>)  $\delta$  35.2, 36.1, 38.7, 40.0, 40.5, 47.4, 54.8, 55.8, 55.9, 70.3, 109.6, 110.7, 117.8, 139.9, 147.3, 148.8, 211.5; IR (film) 2929, 1716, 1588, 1518, 1453, 1409, 1252, 1174, 1146, 1025, 909, 850, 804, 731 cm<sup>-1</sup>; HRMS (MALDI): Exact mass calcd for C<sub>17</sub>H<sub>24</sub>NO<sub>3</sub>: 290.1751. Found: 290.1756. The enantiomeric ratio was determined by Daicel Chiralcel AS-H (25 cm), Hexanes / IPA = 80 / 20, 1.0 mL/min<sup>-1</sup>,  $\lambda$  = 220 nm, *t*<sub>R</sub> (minor) = 24.67 min, *t*<sub>R</sub> (major) = 27.96 min.

X-ray structure of enantiopure 6-oxo-1-tosyl-2,3,3a,6,7,7a-hexahydro-1H-indol-3a-yl 4-bromobenzoate **9** [CCDC 805906 contains the supplementary crystallographic data. These data can be obtained free of charge from the Cambridge Crystallographic Data Centre via [www.ccdc.cam.ac.uk /data request/cif.](http://www.ccdc.cam.ac.uk/data_request/cif)]



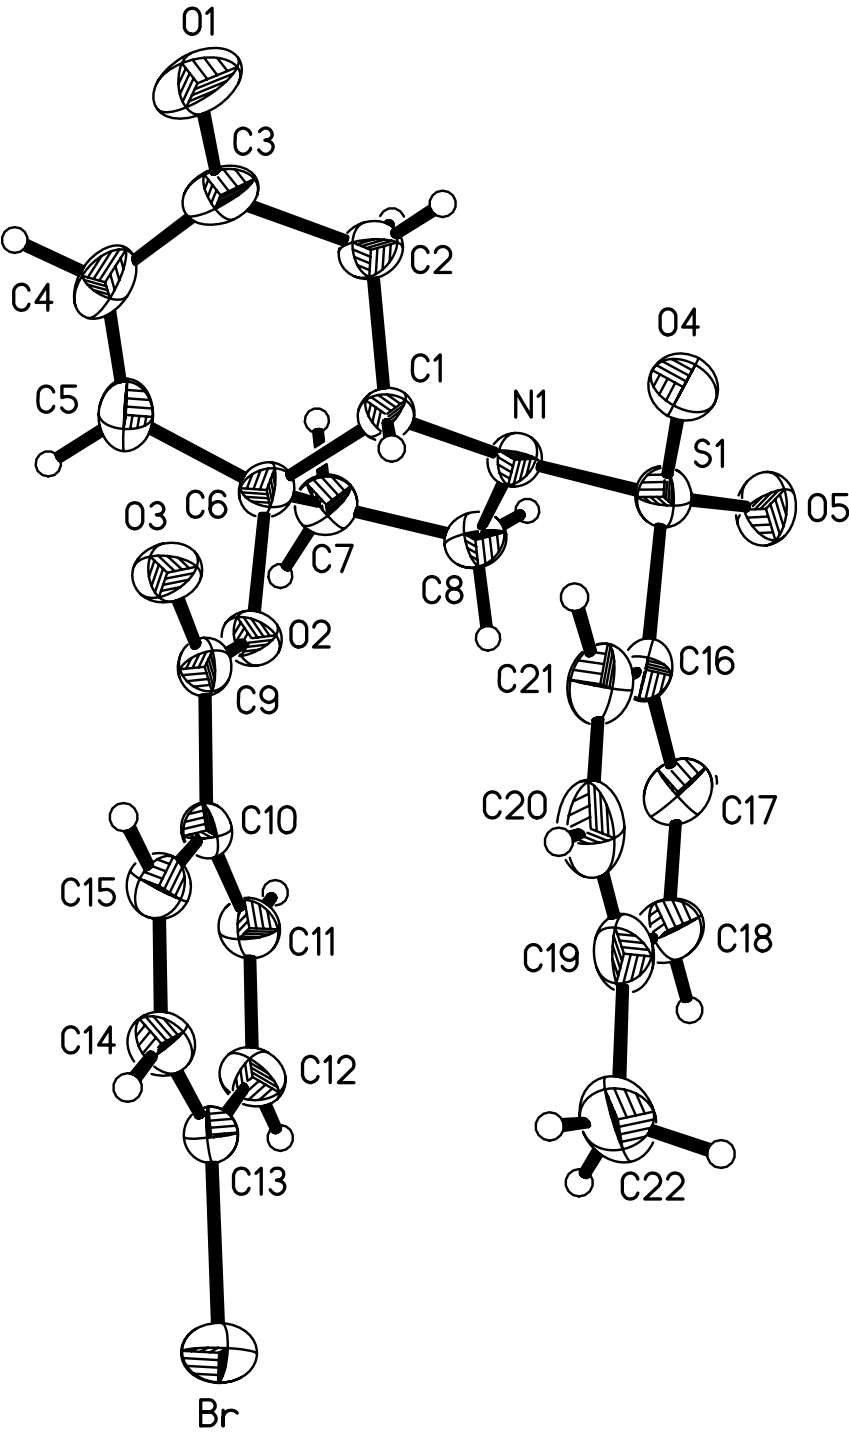

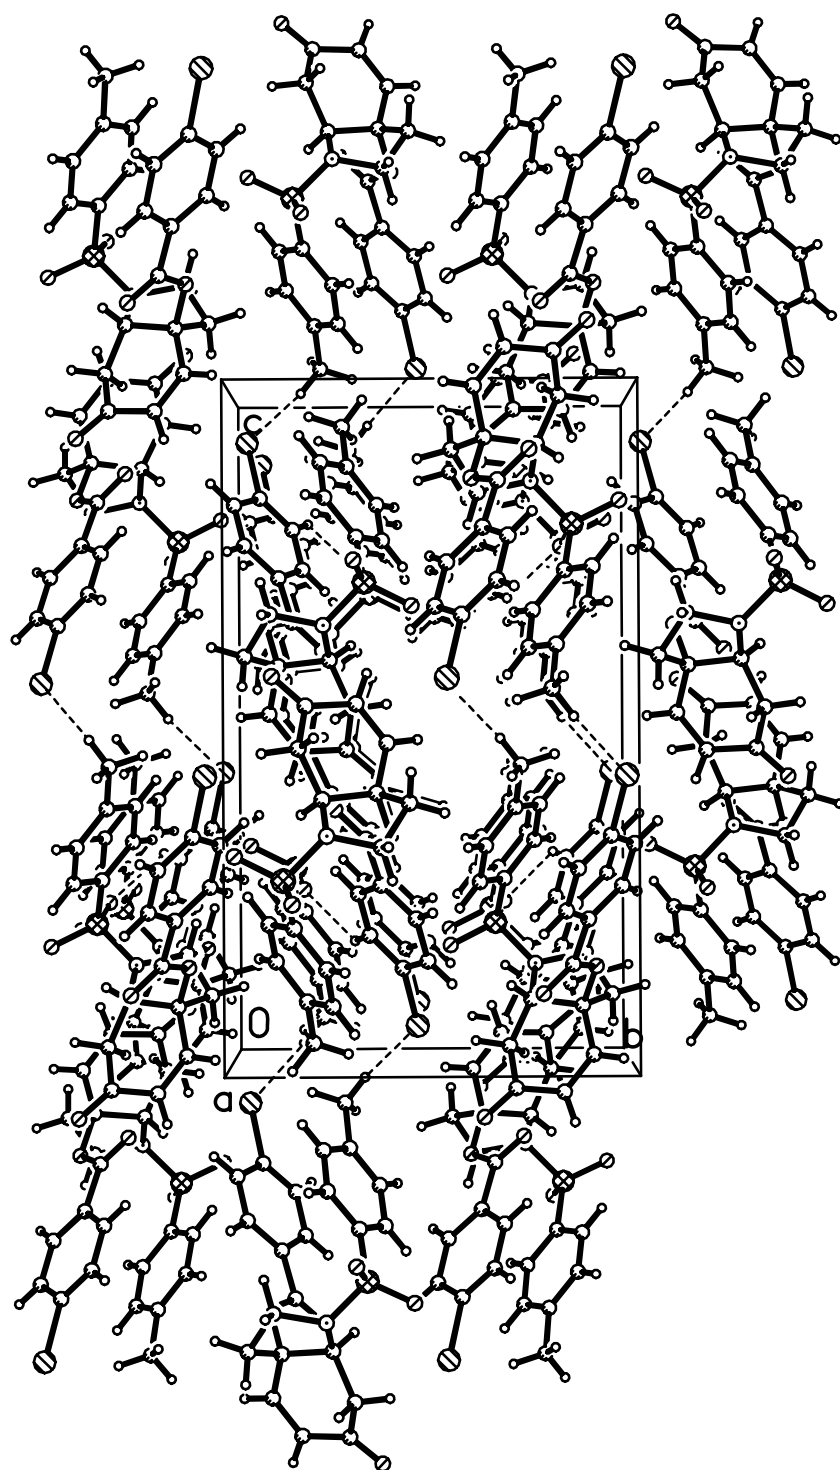

4 NMR and HPLC Spectra

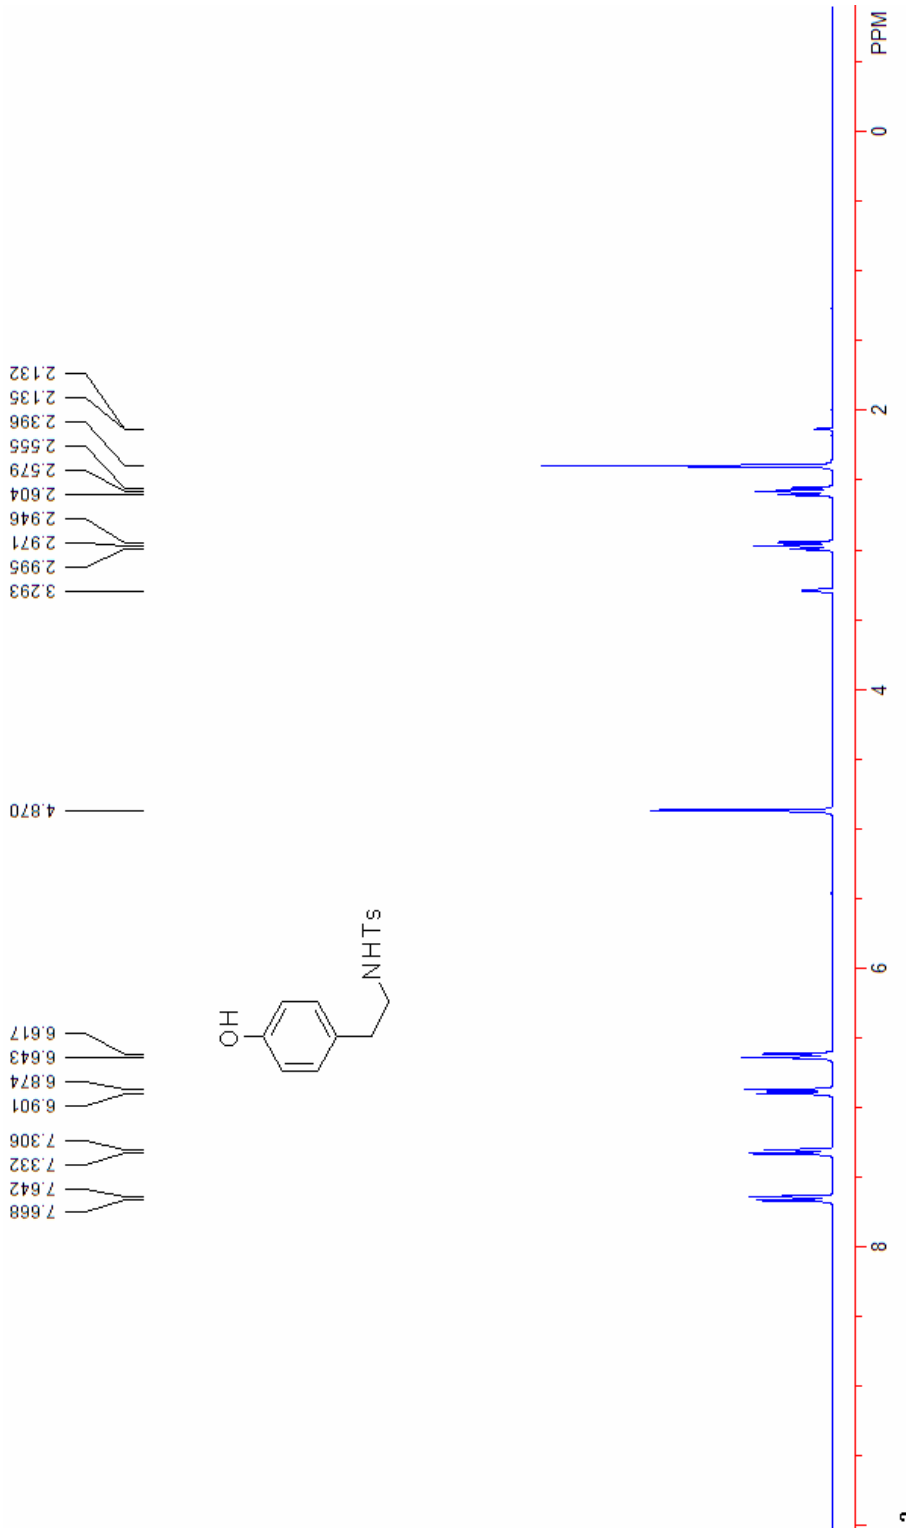

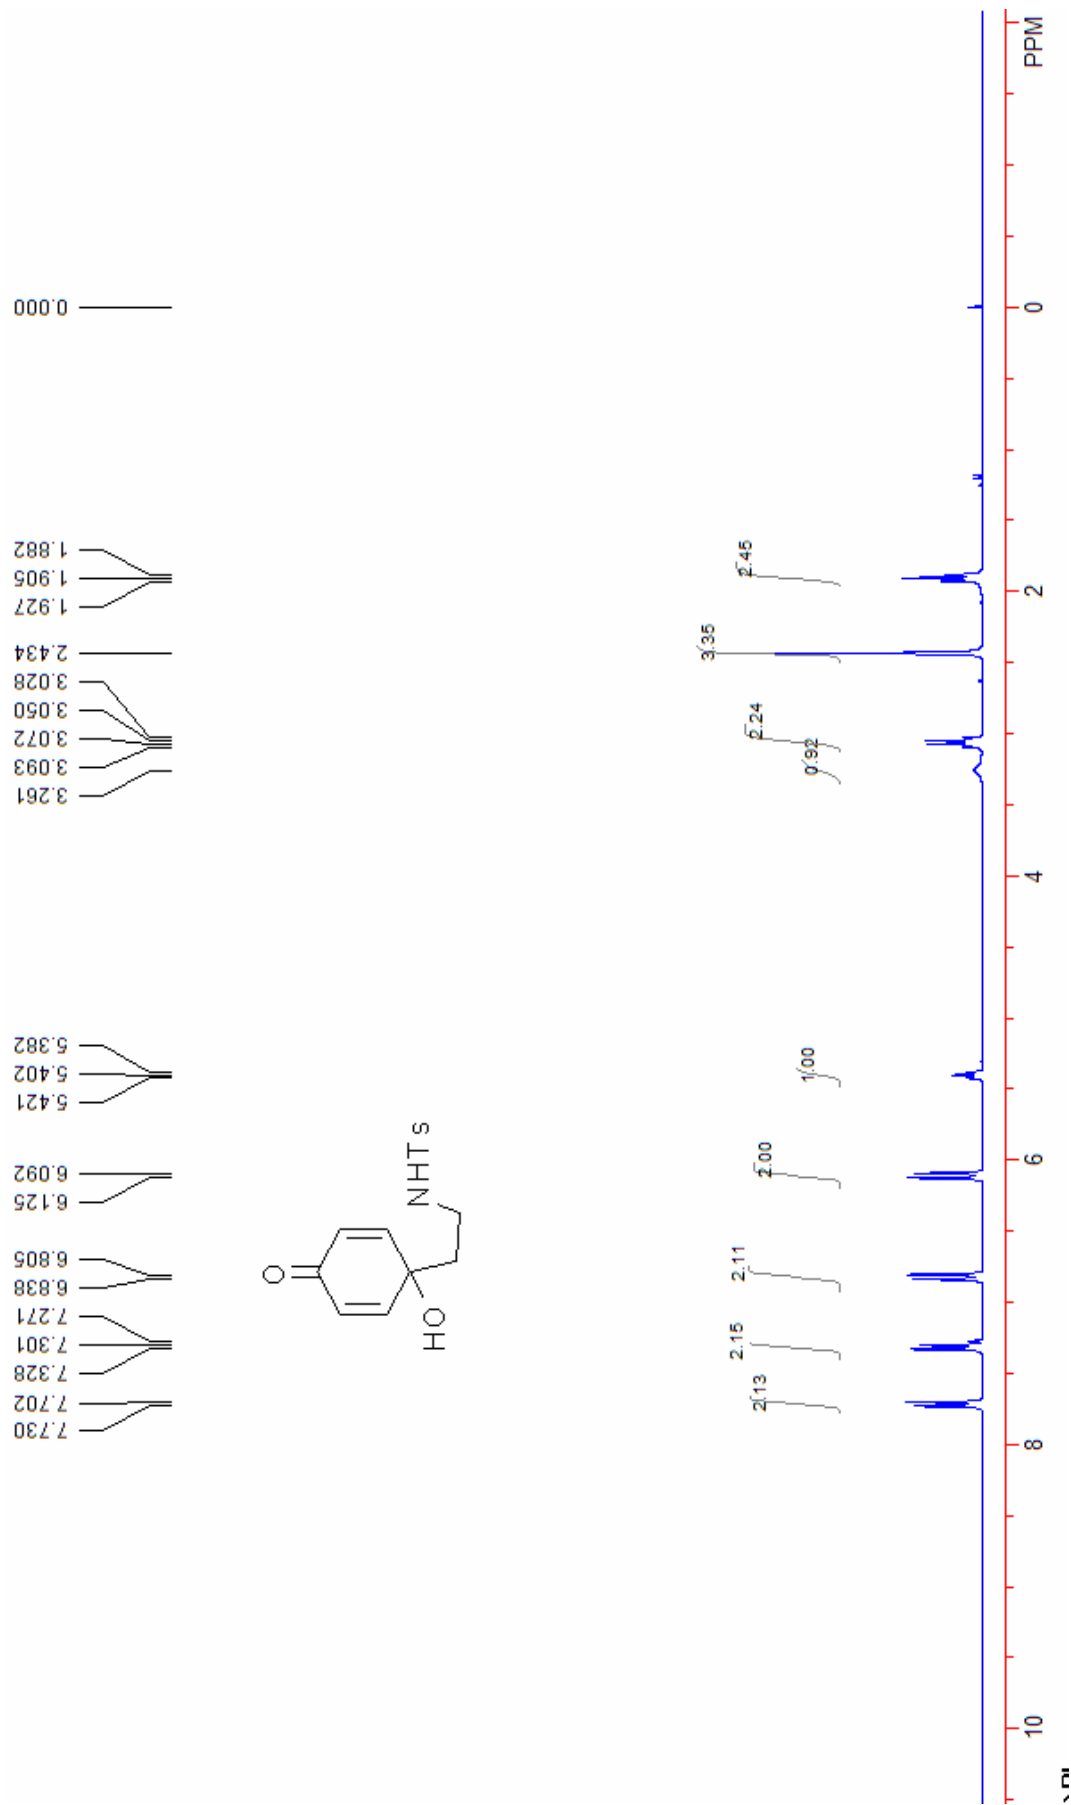

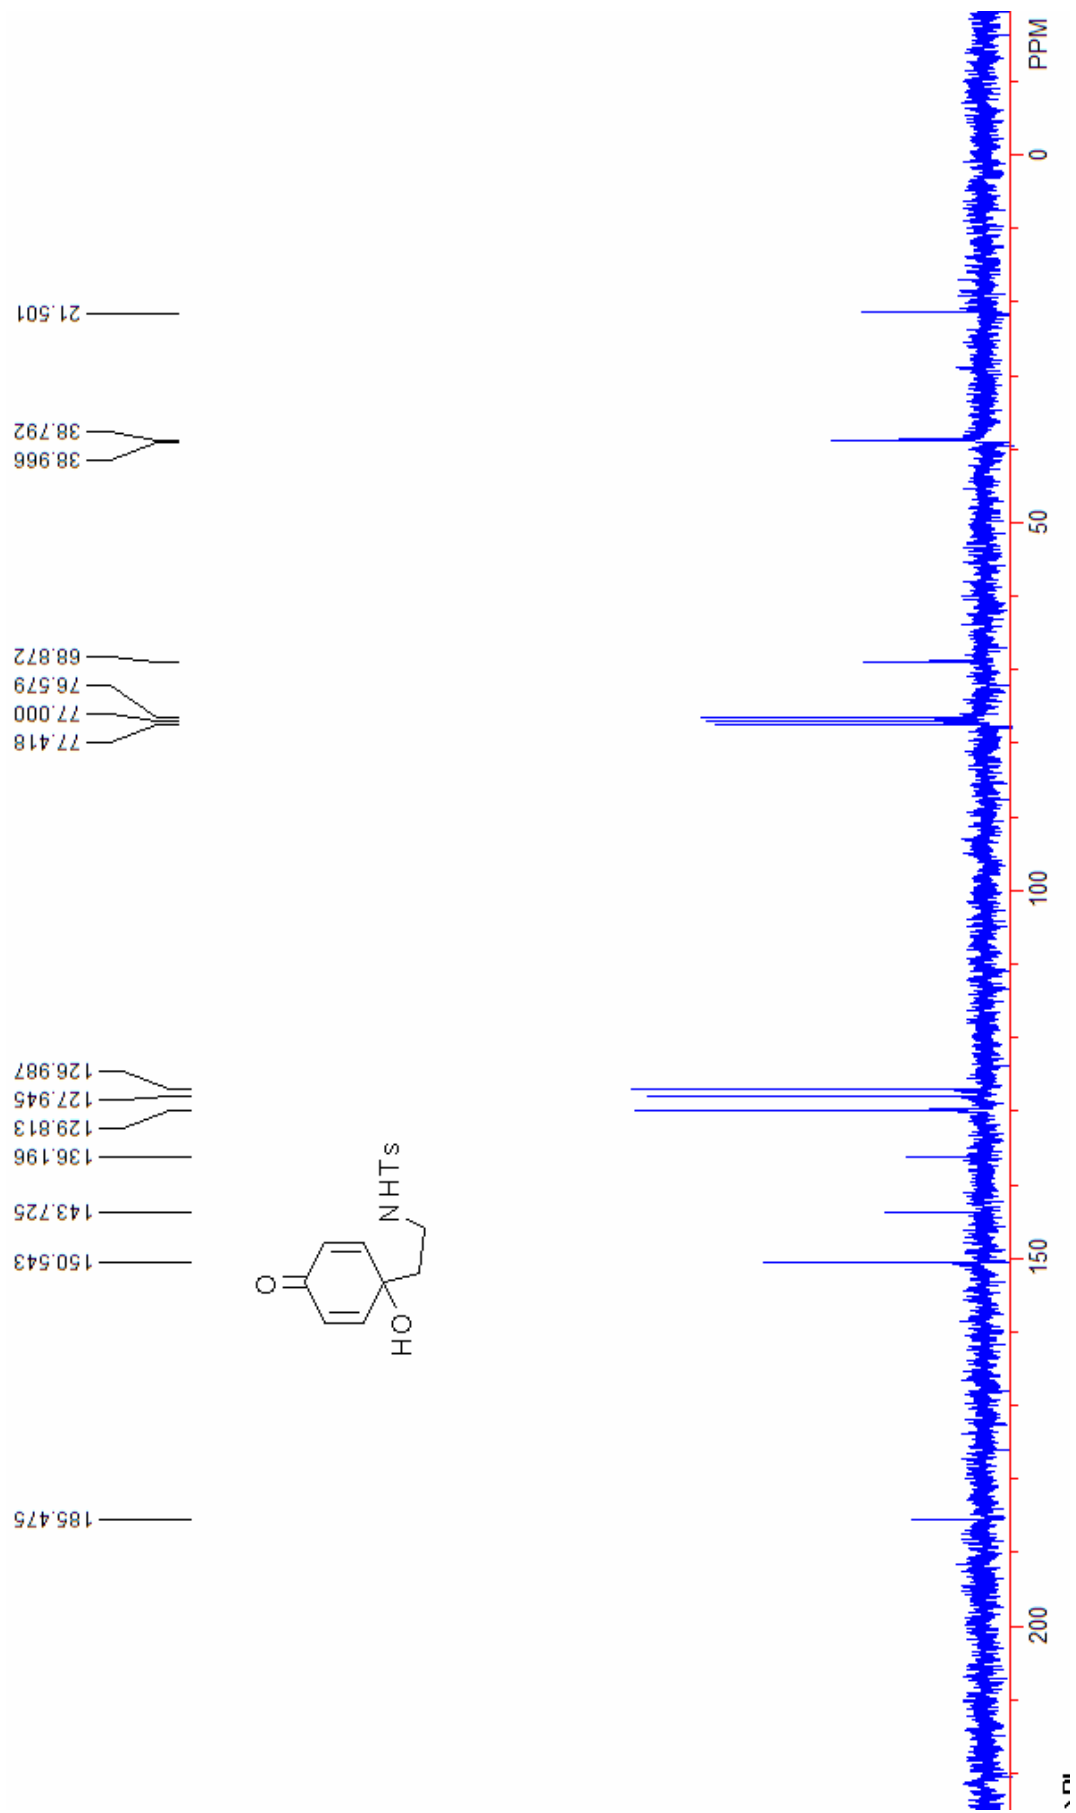

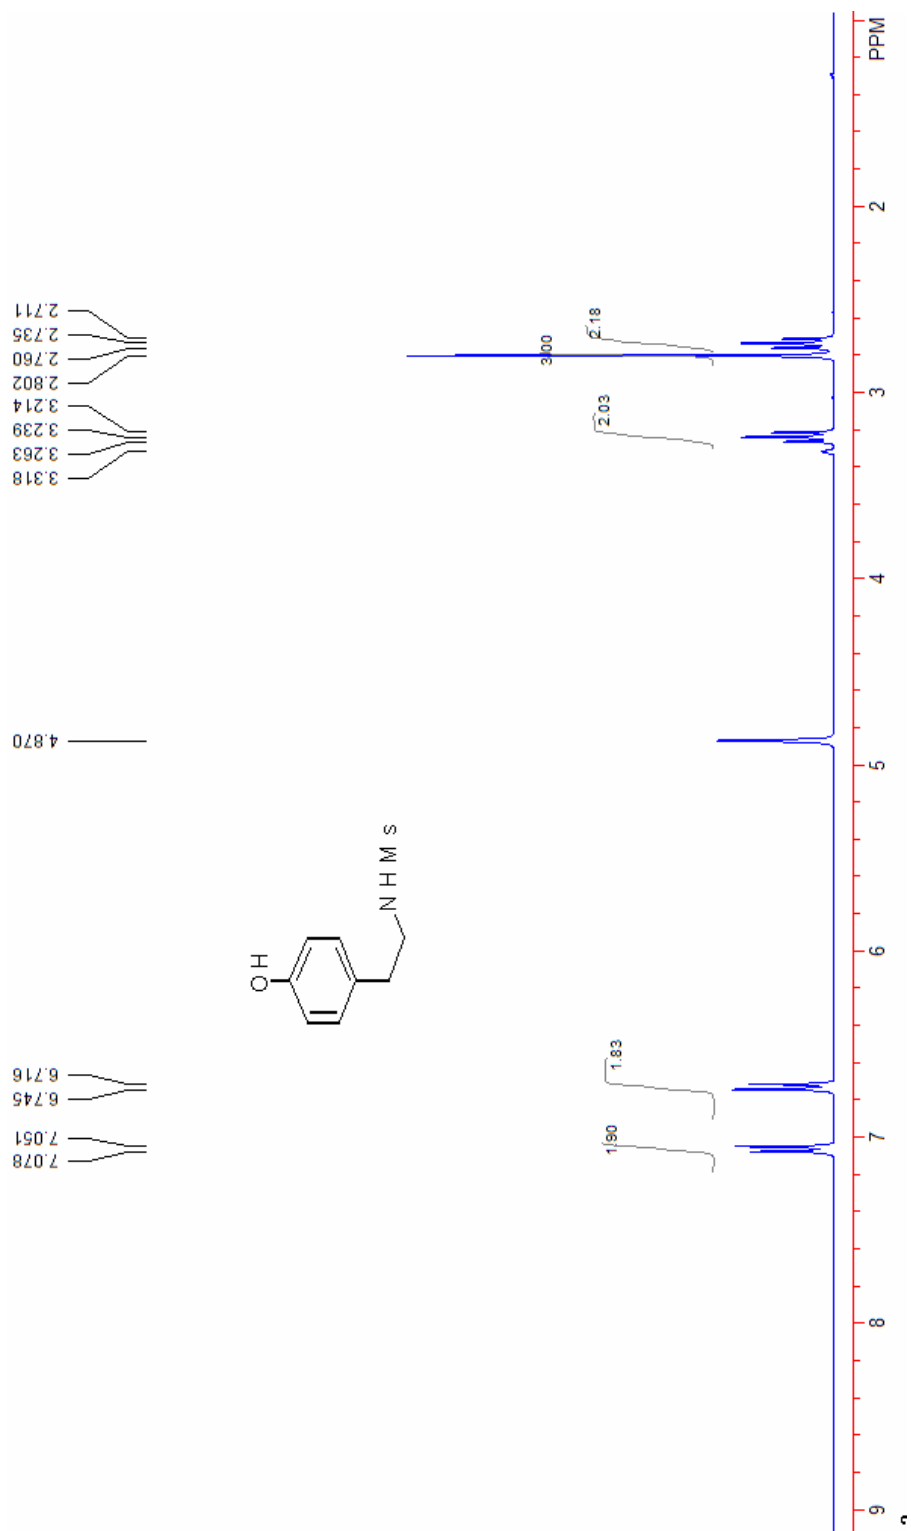

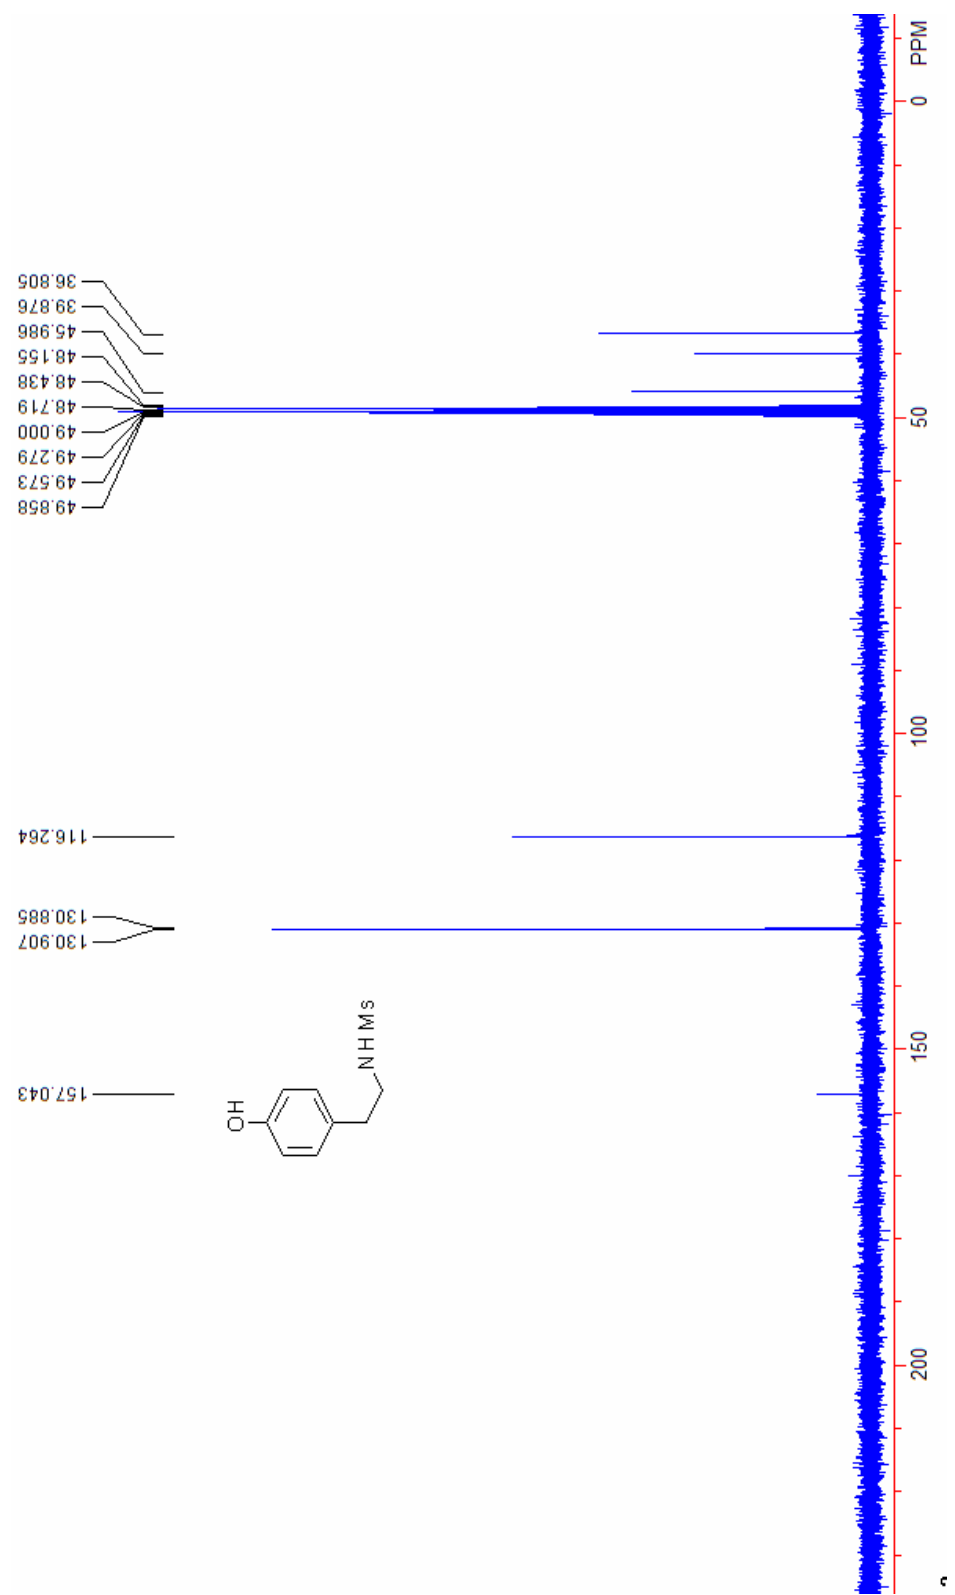

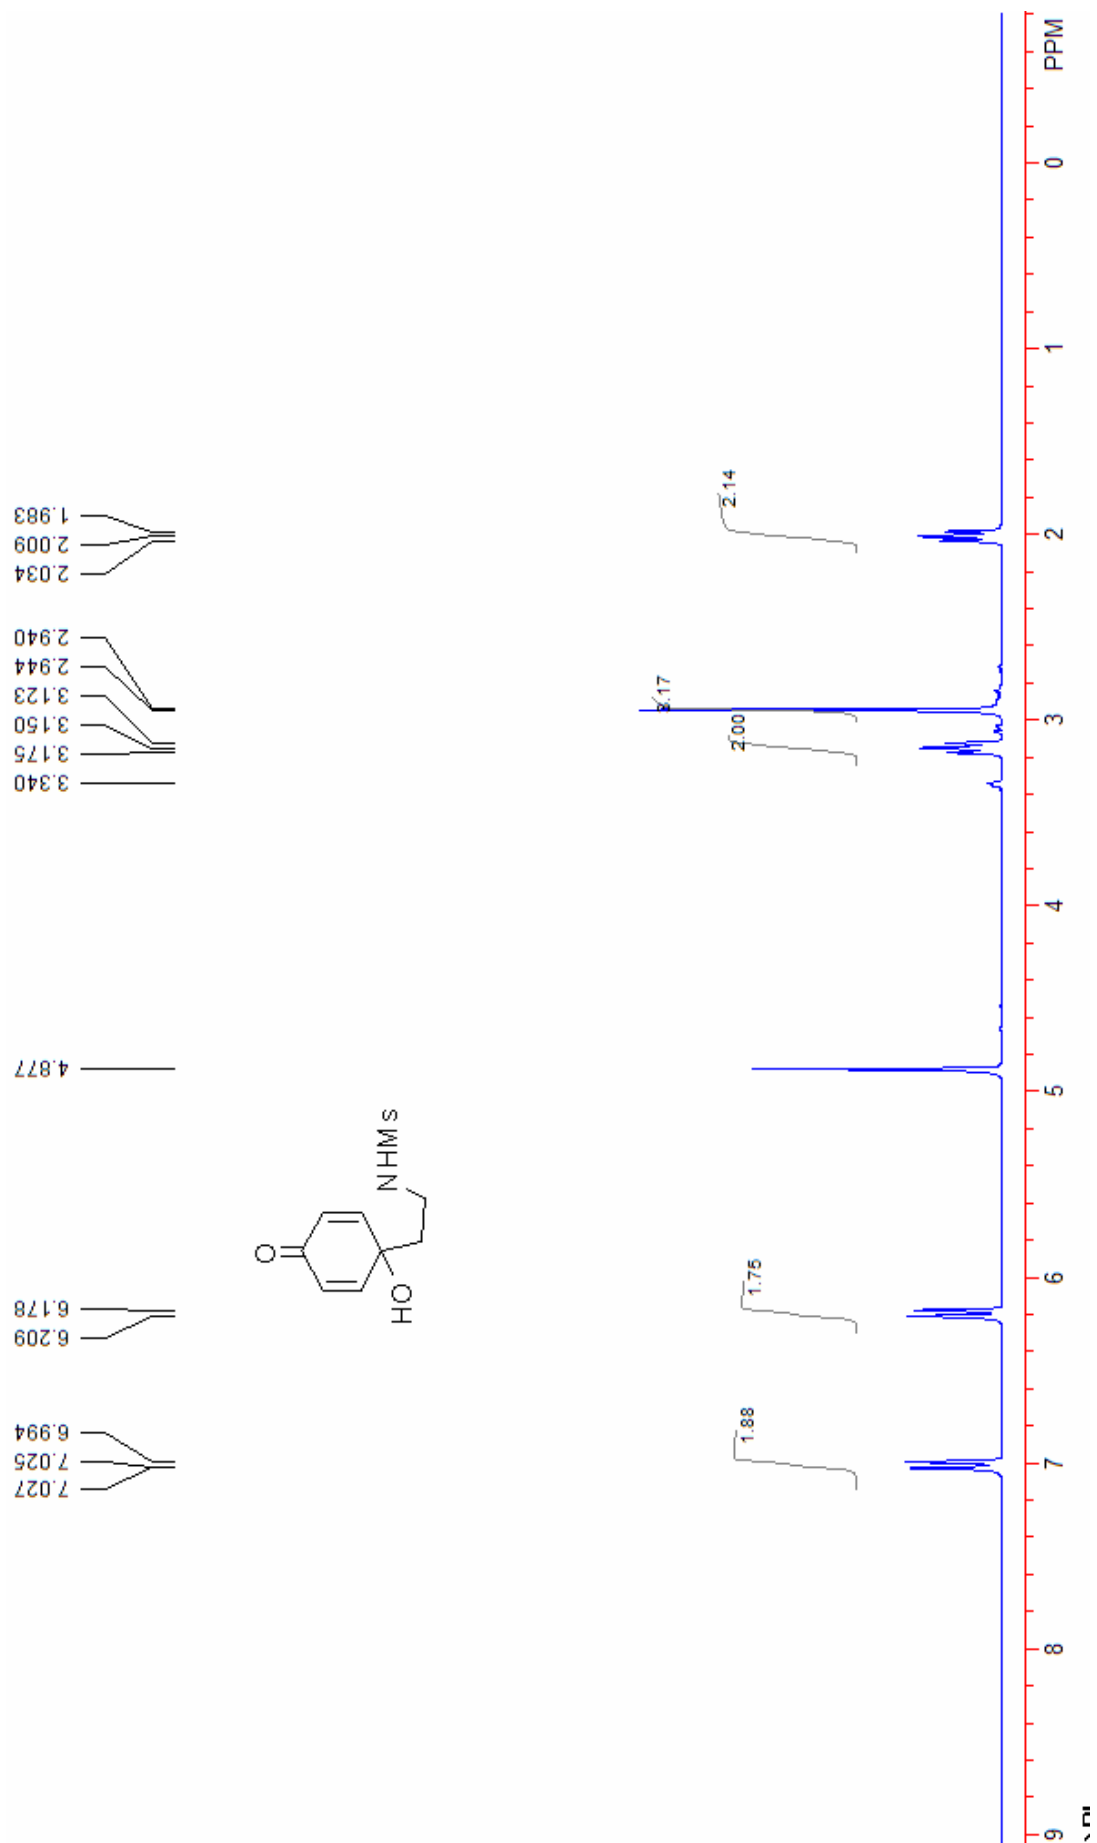



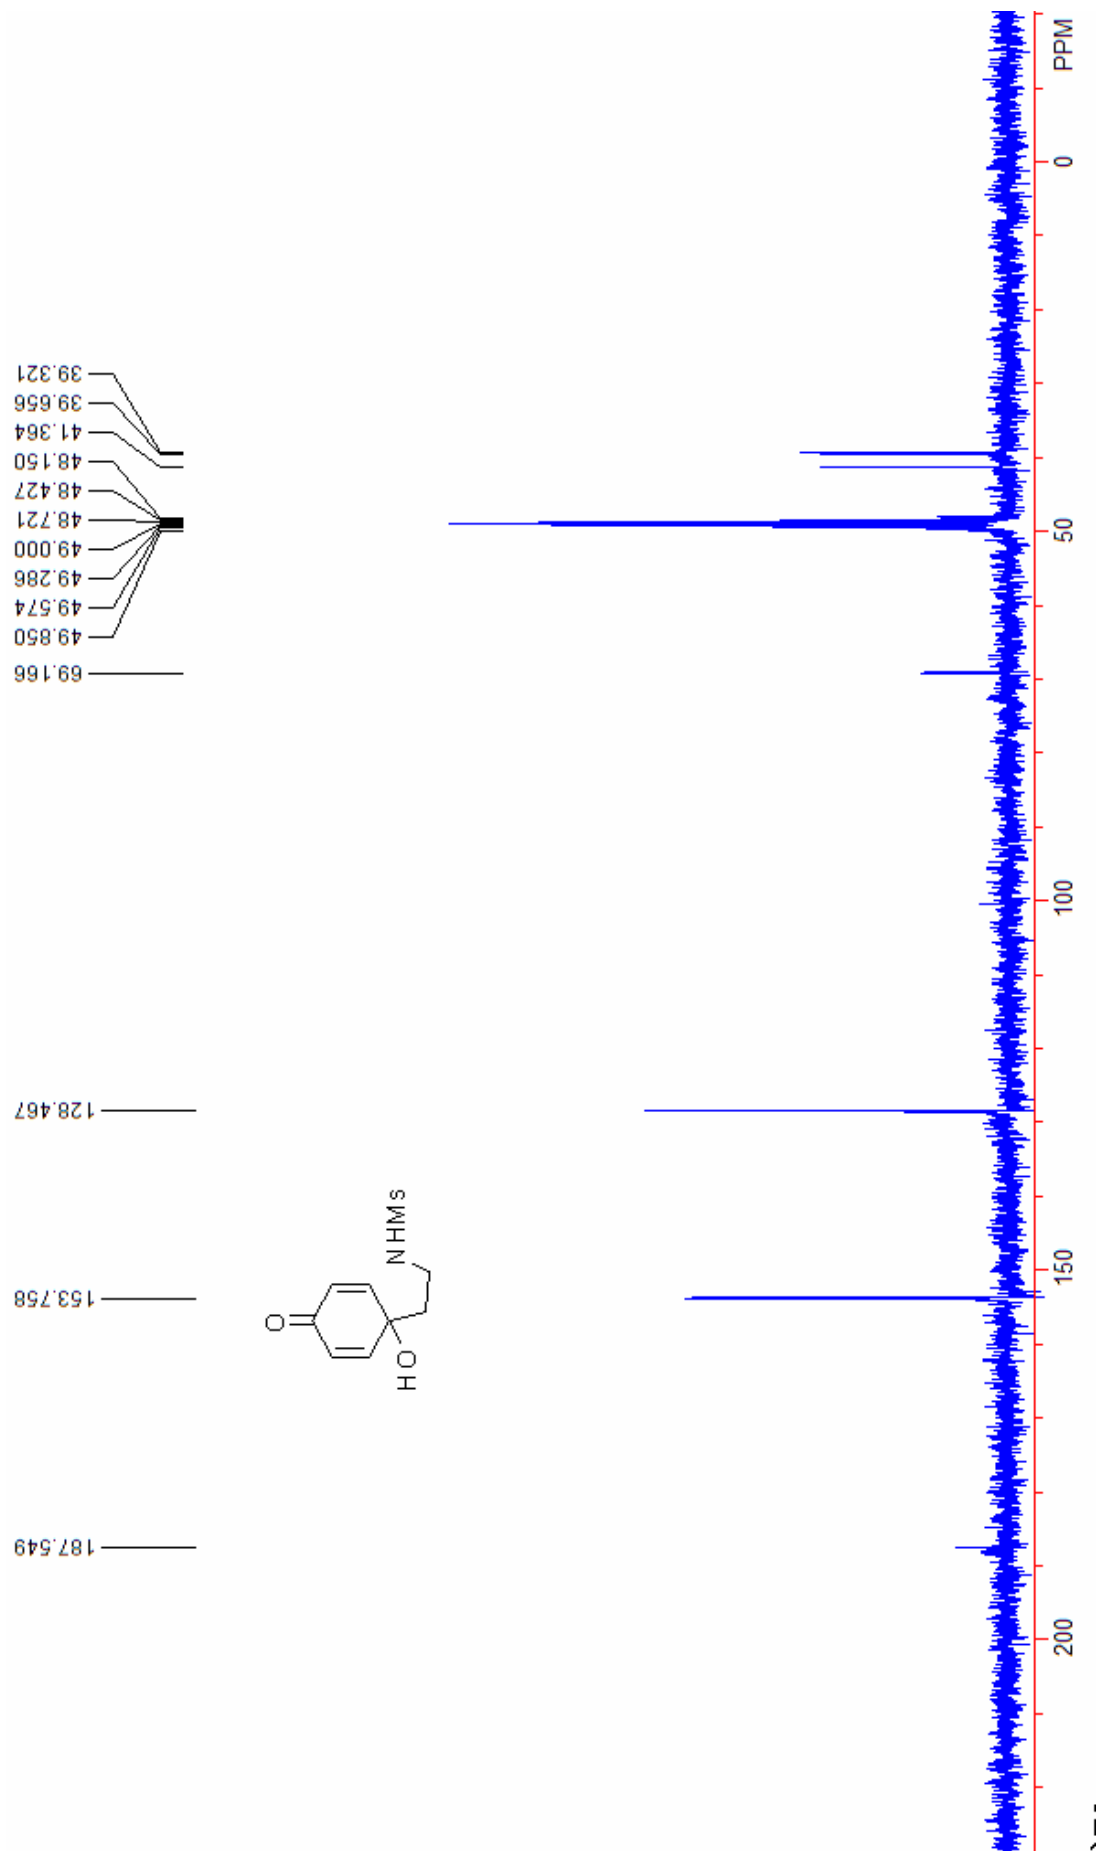

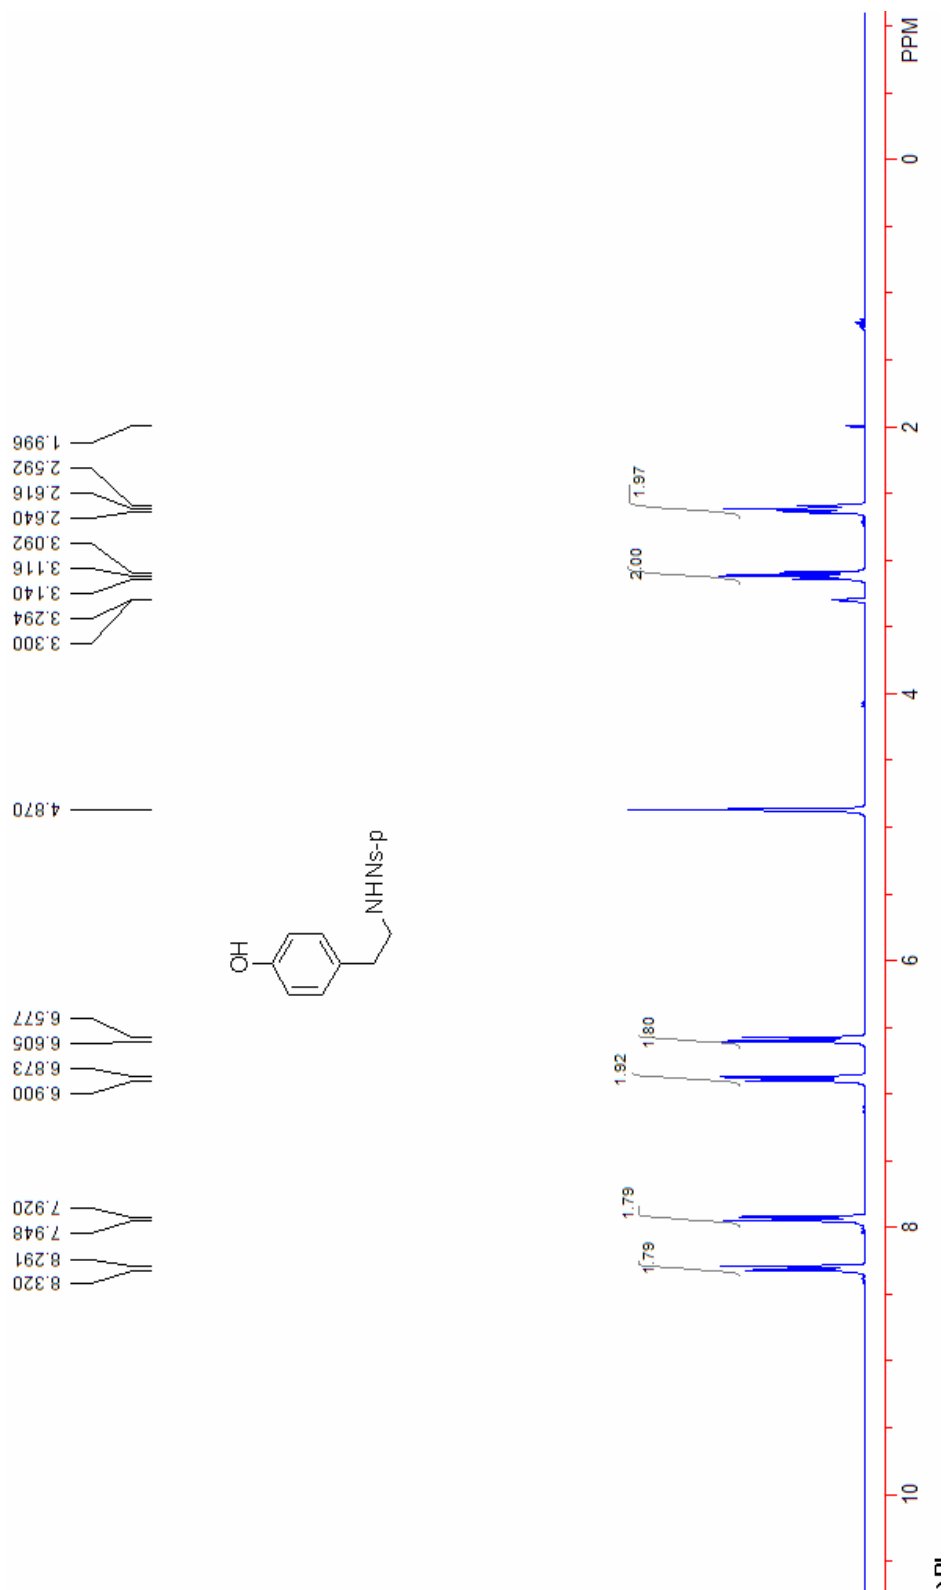

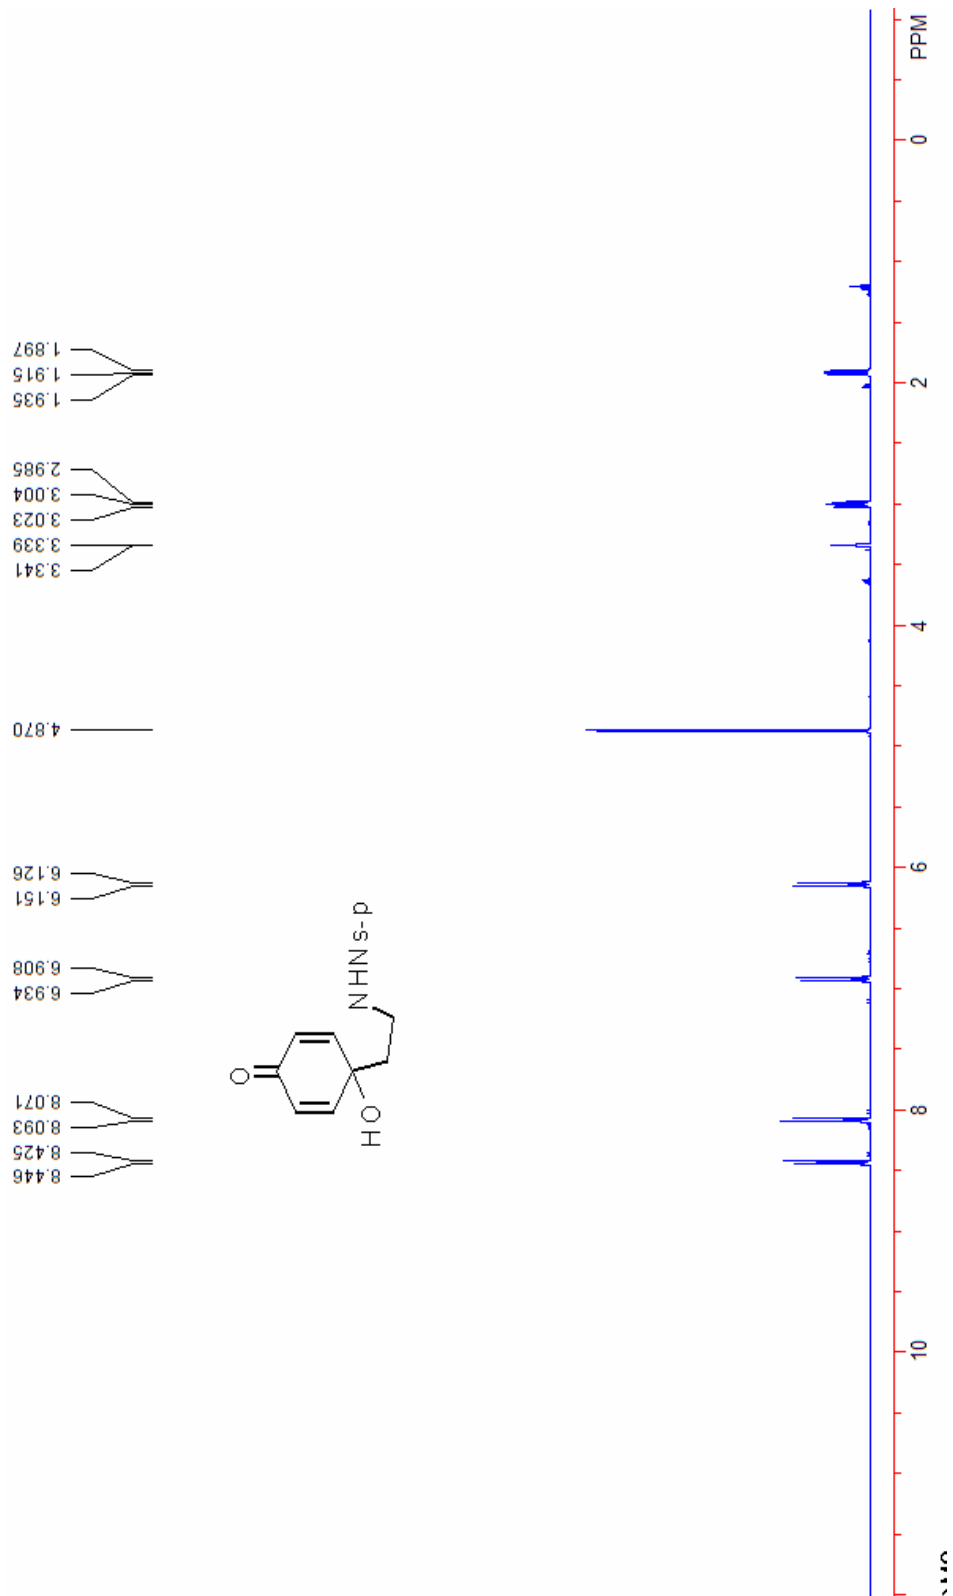

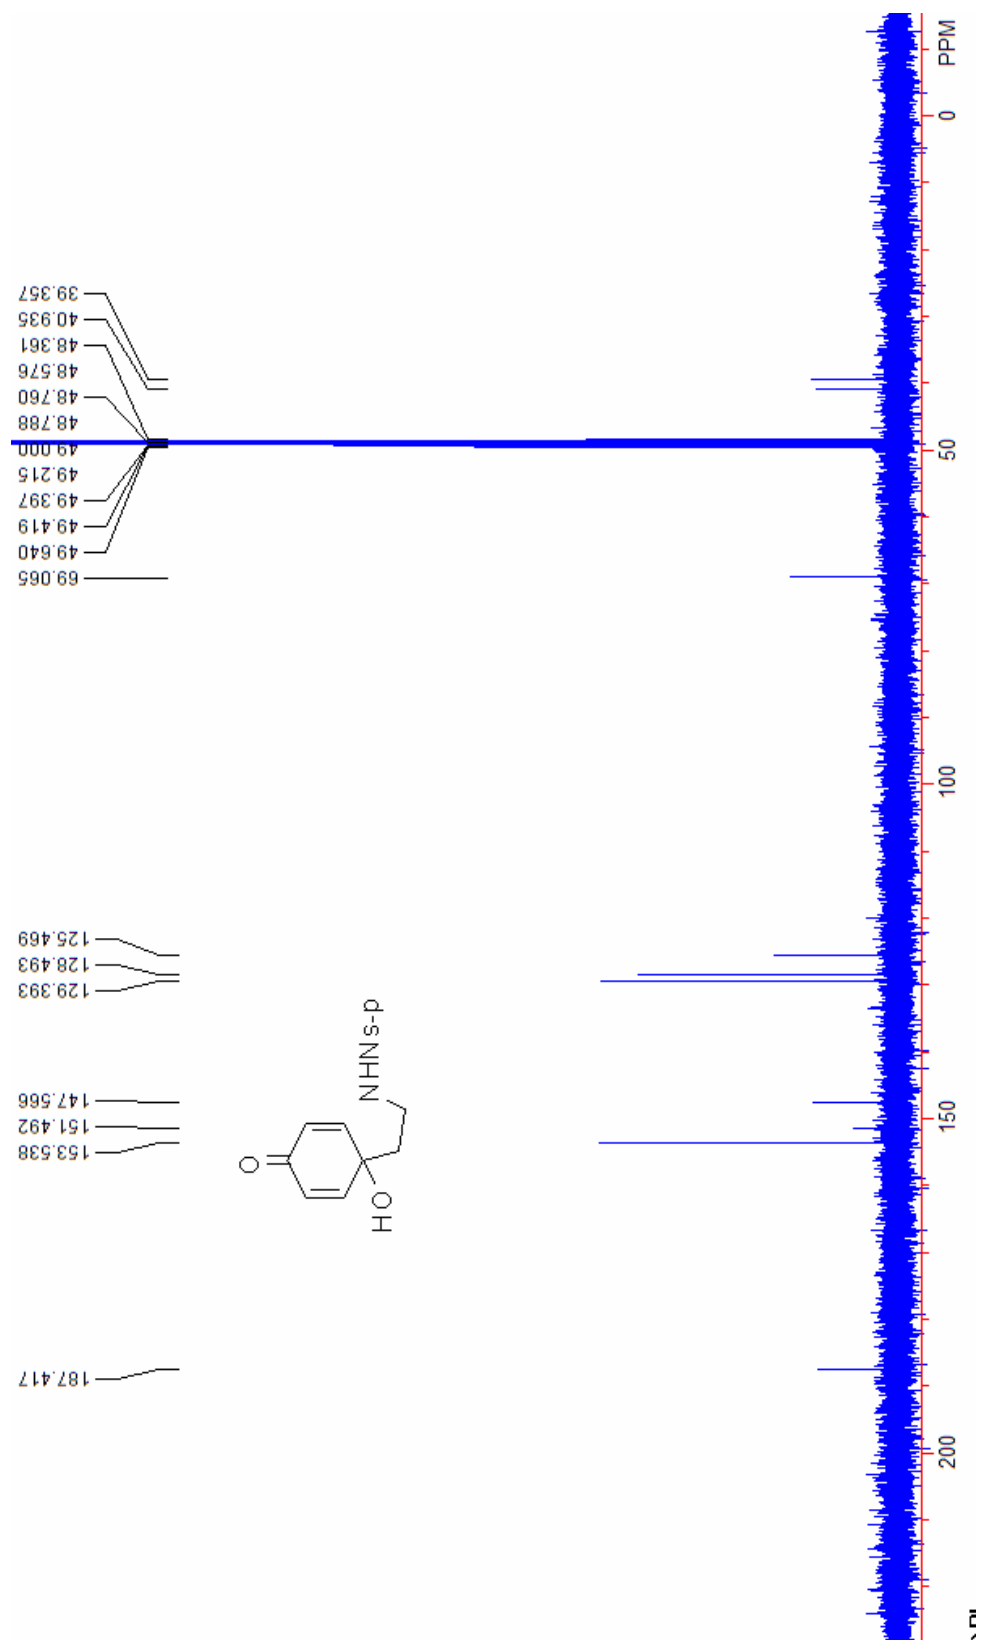

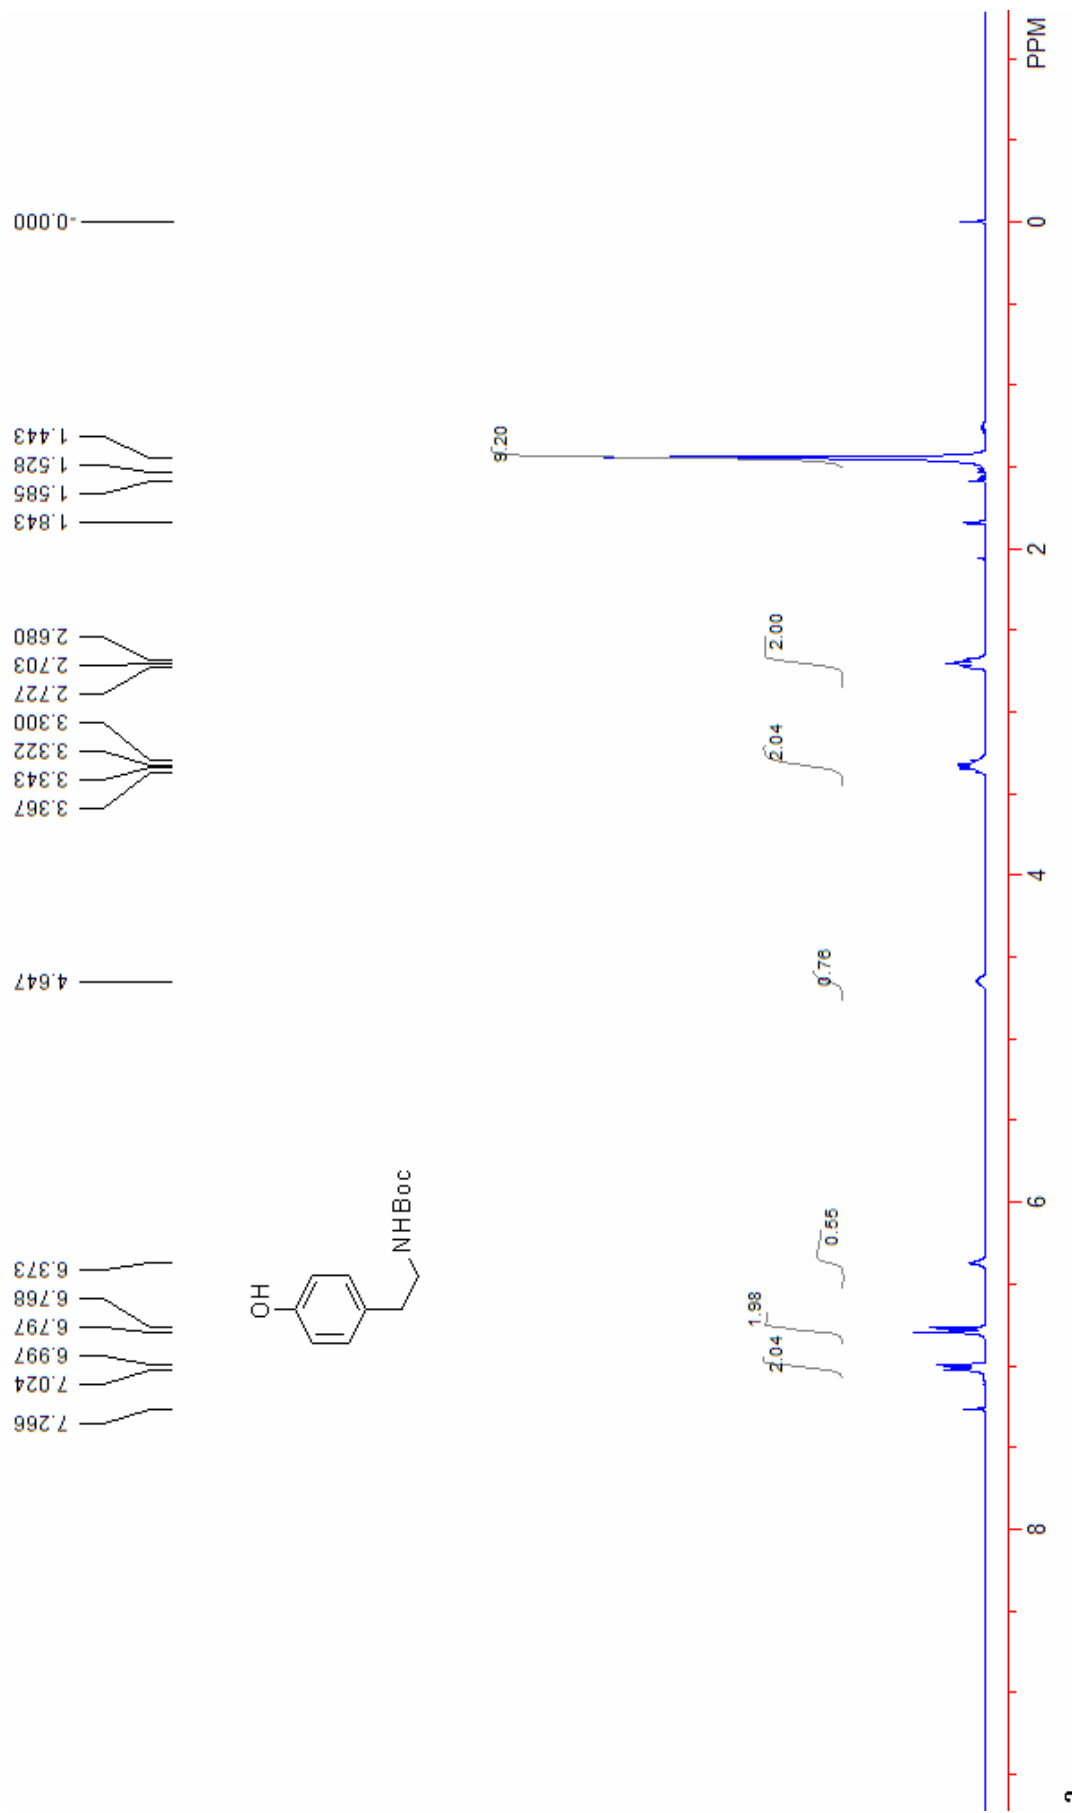

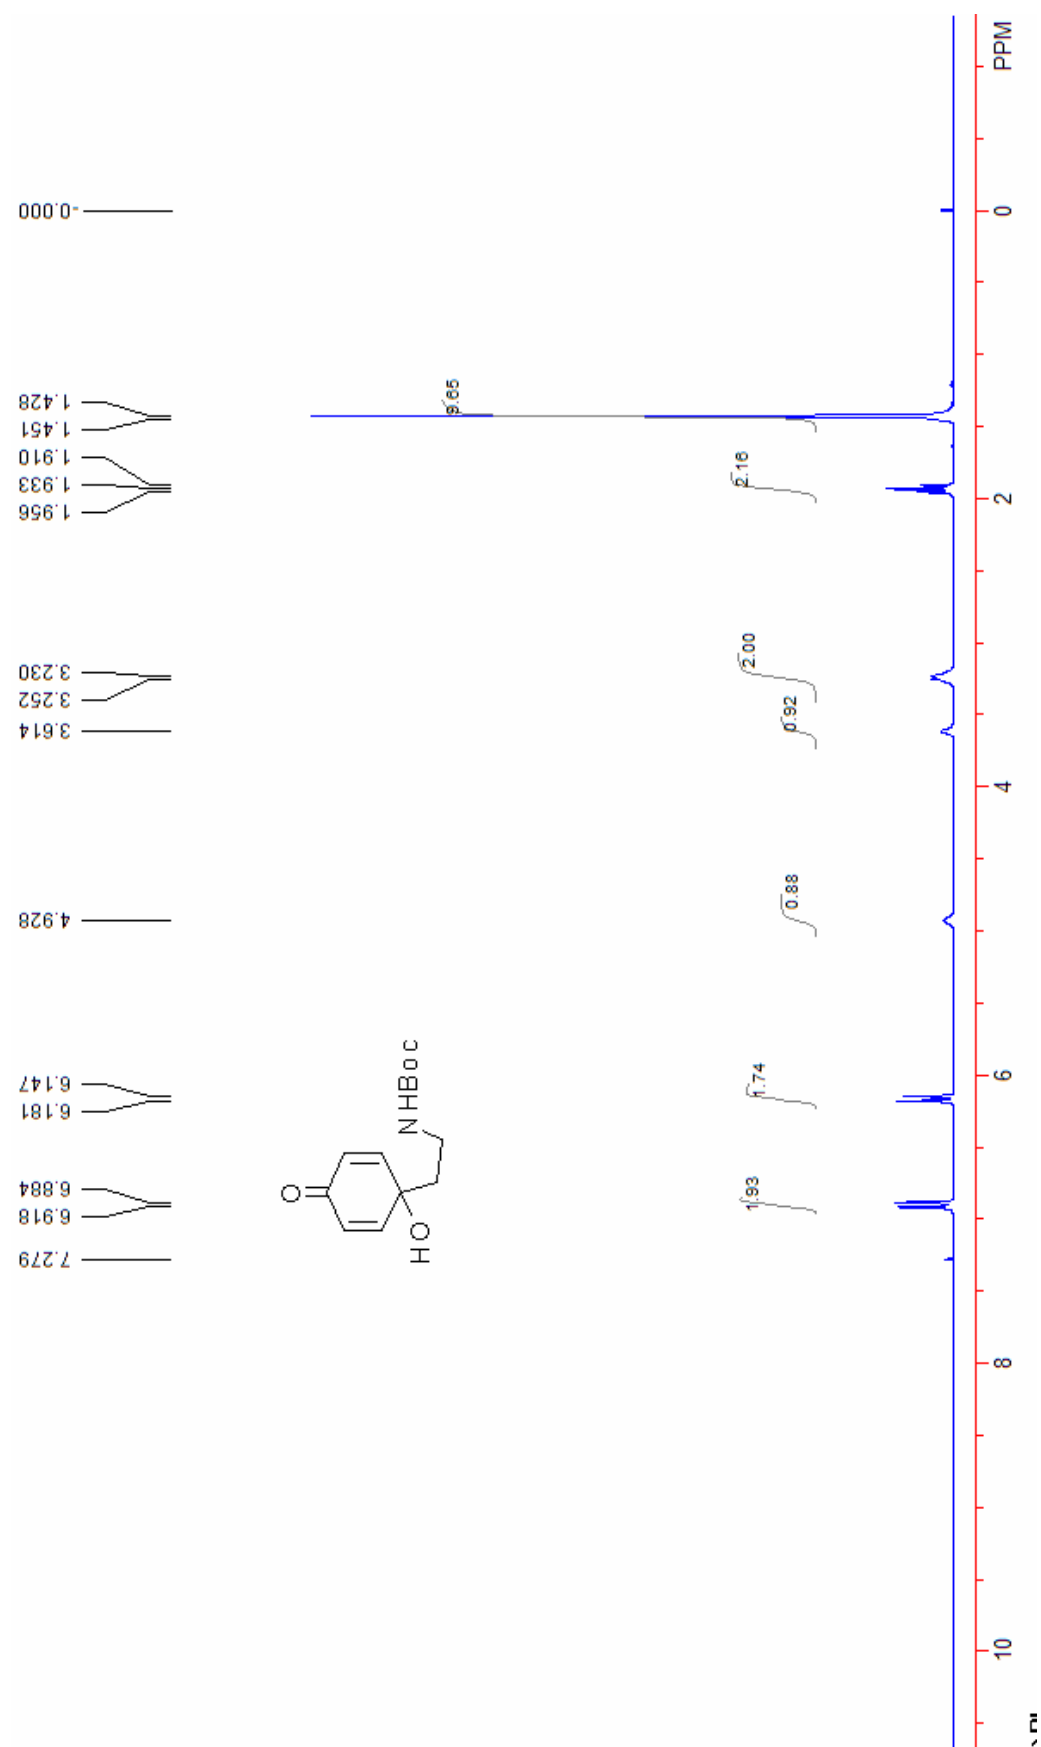

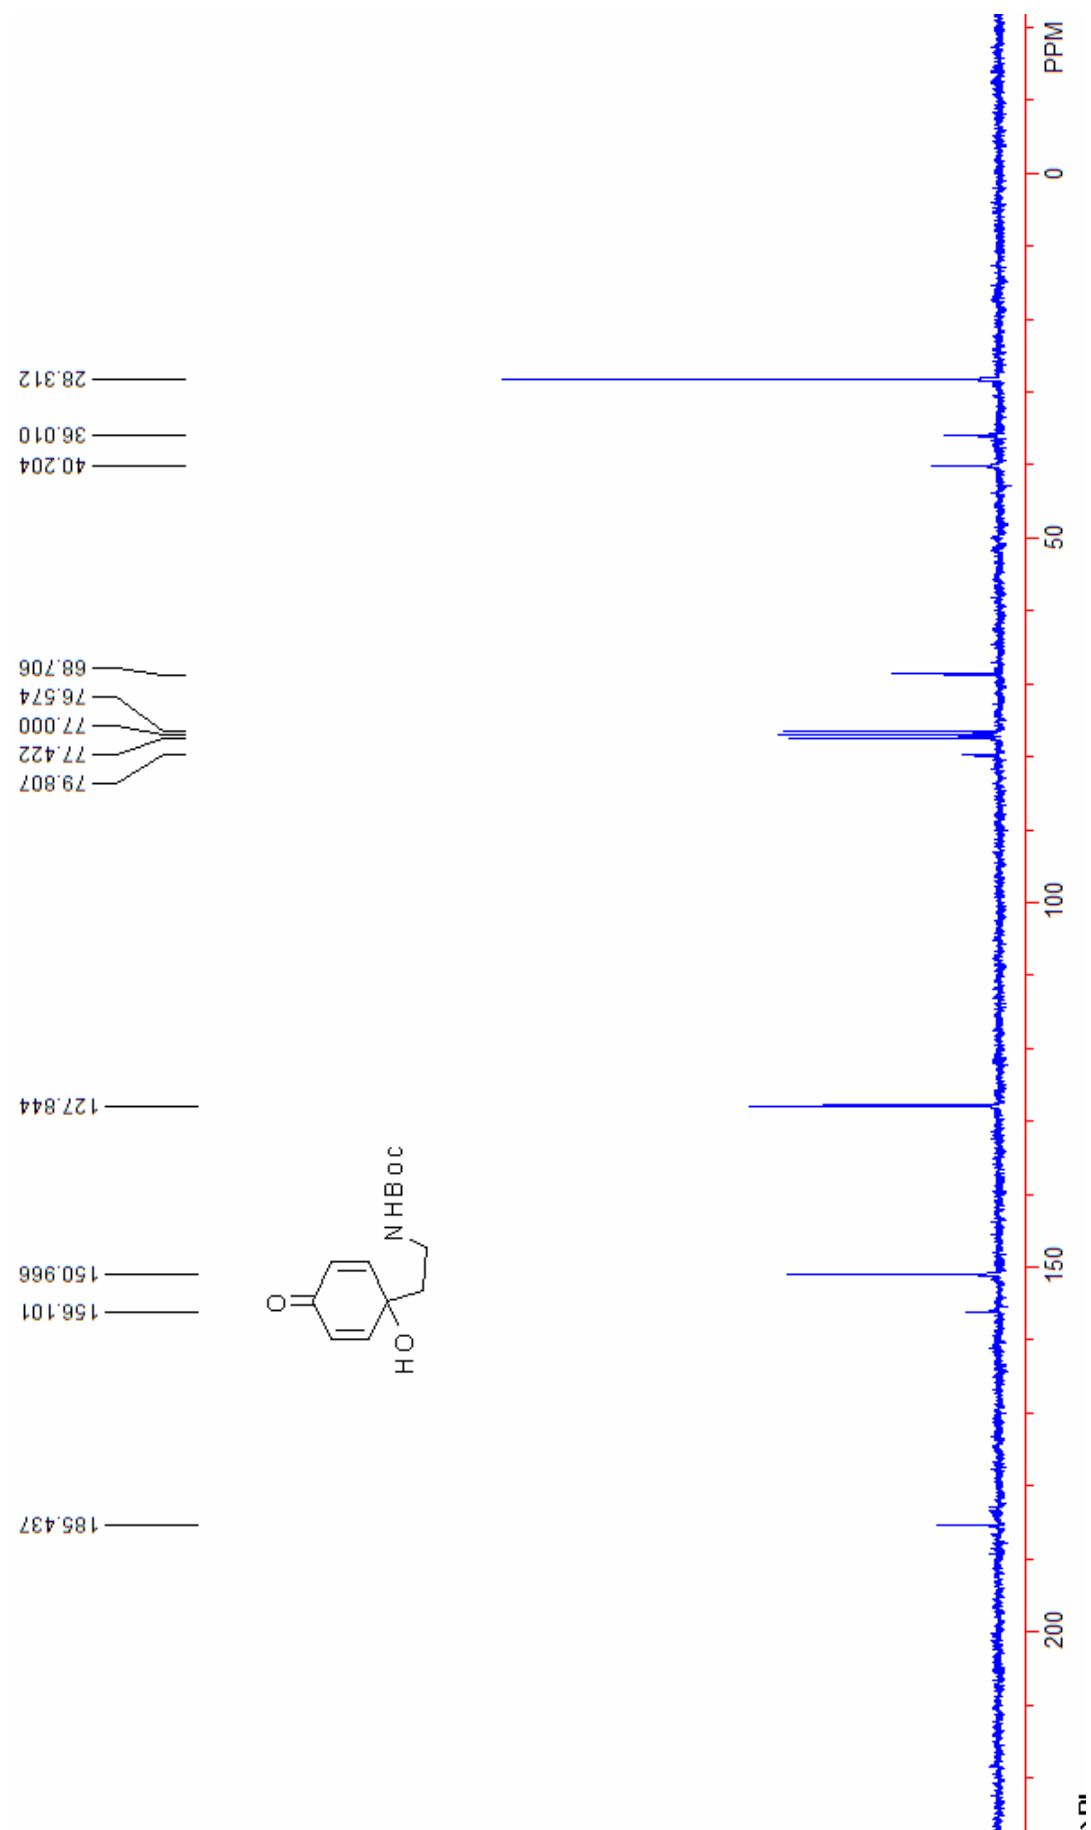

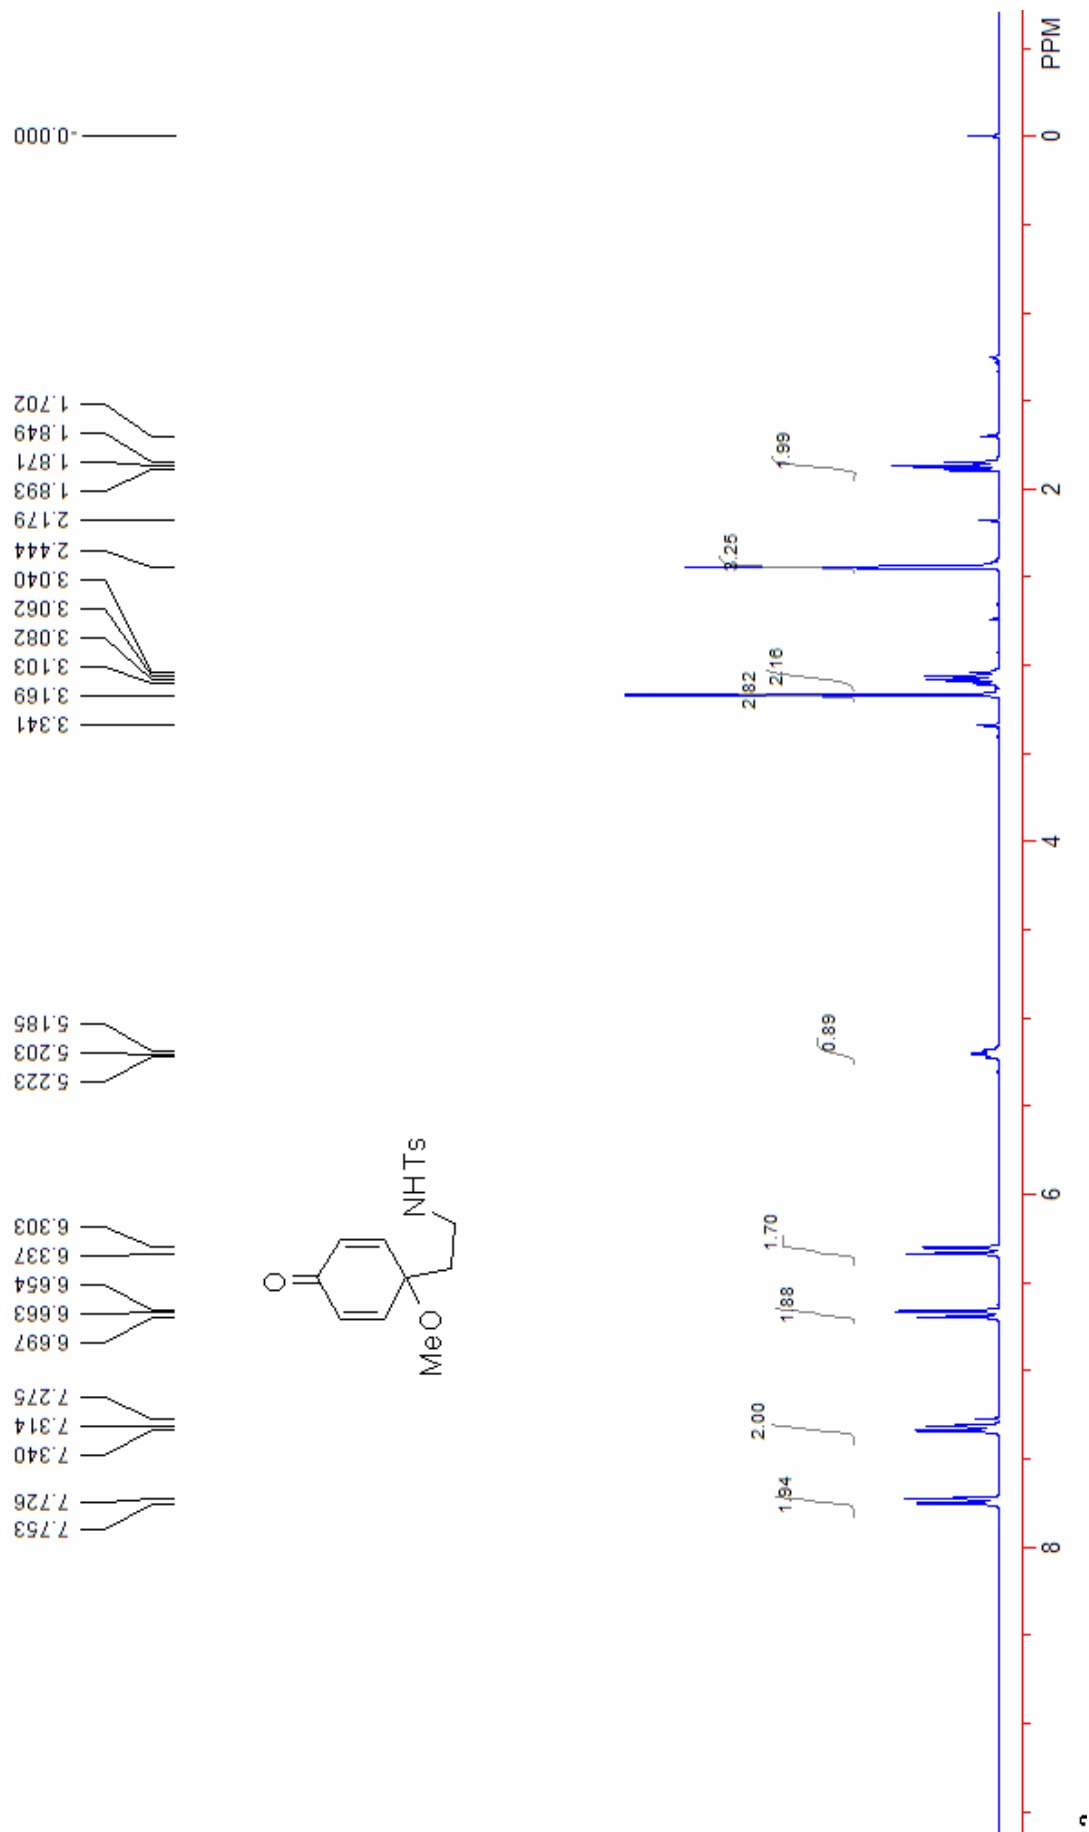



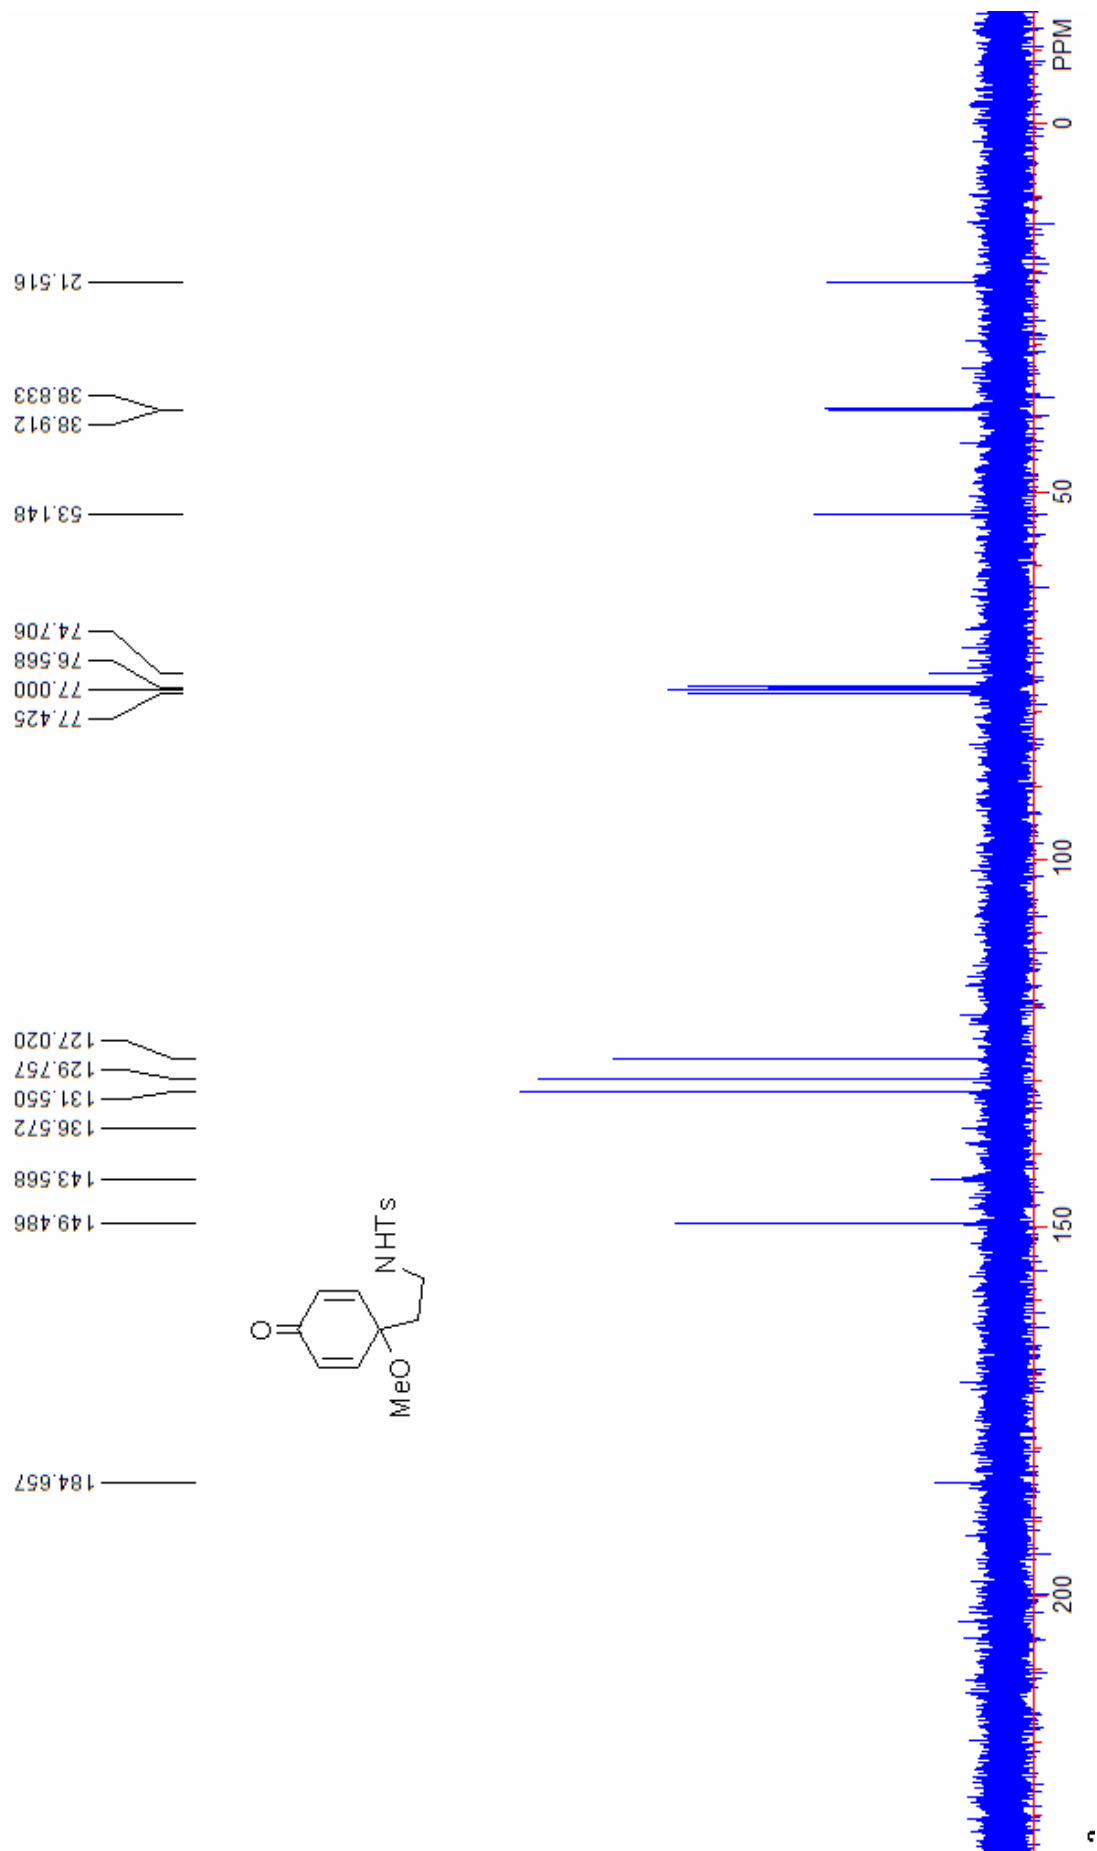

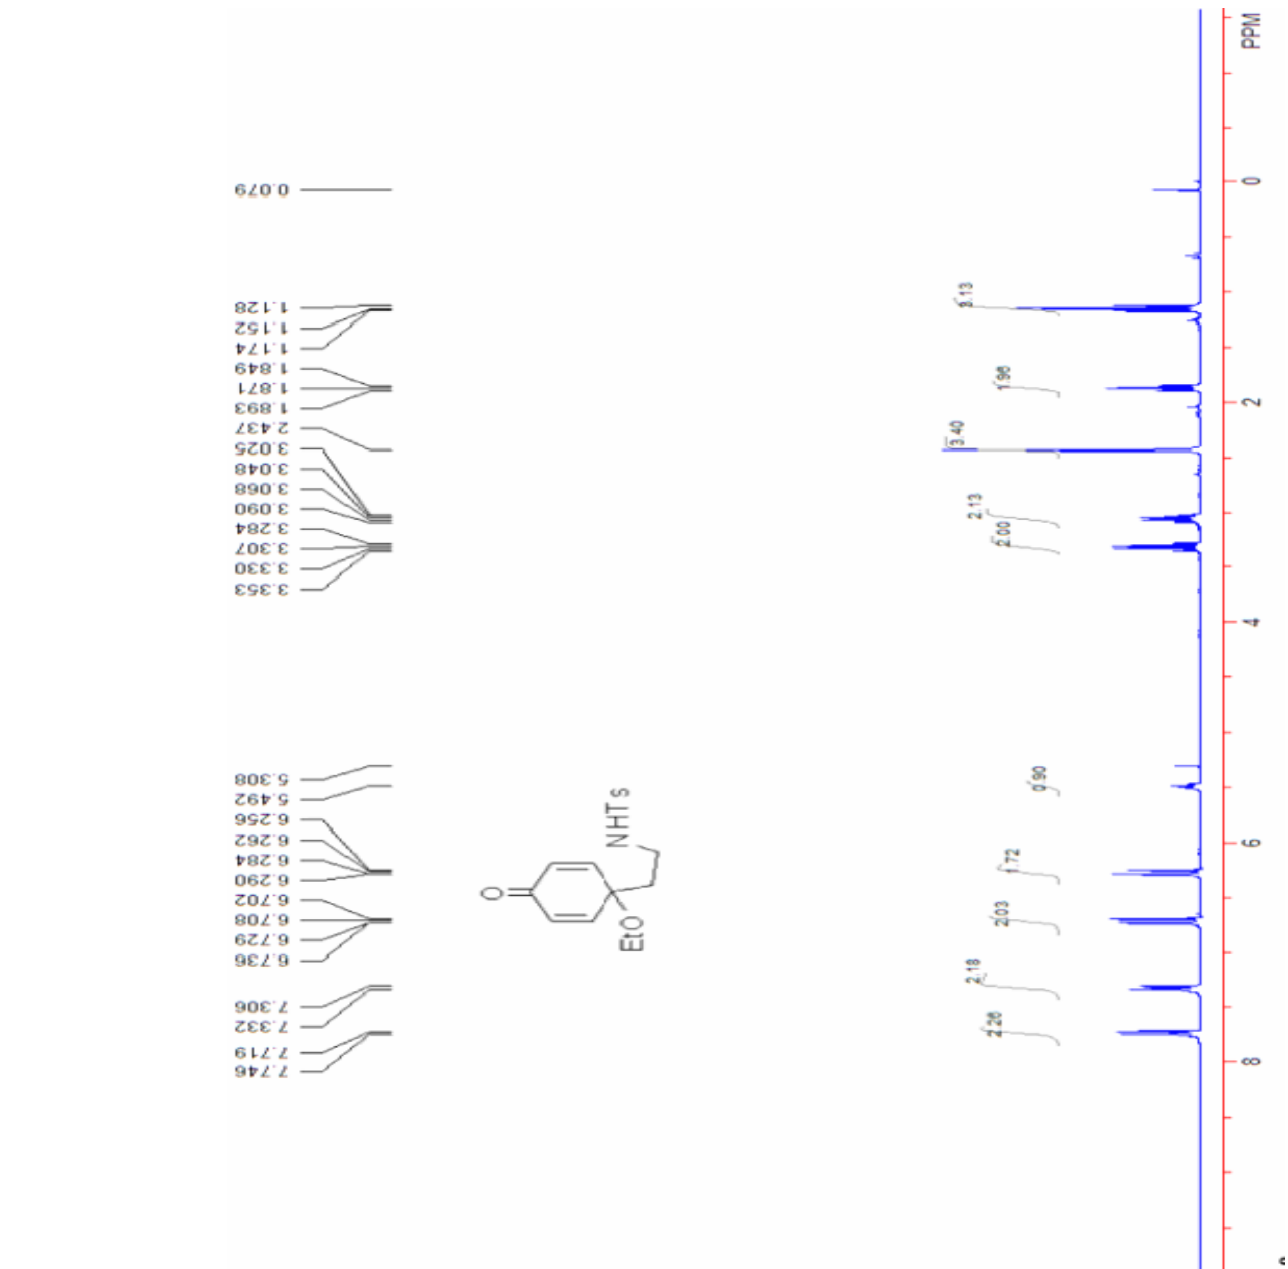

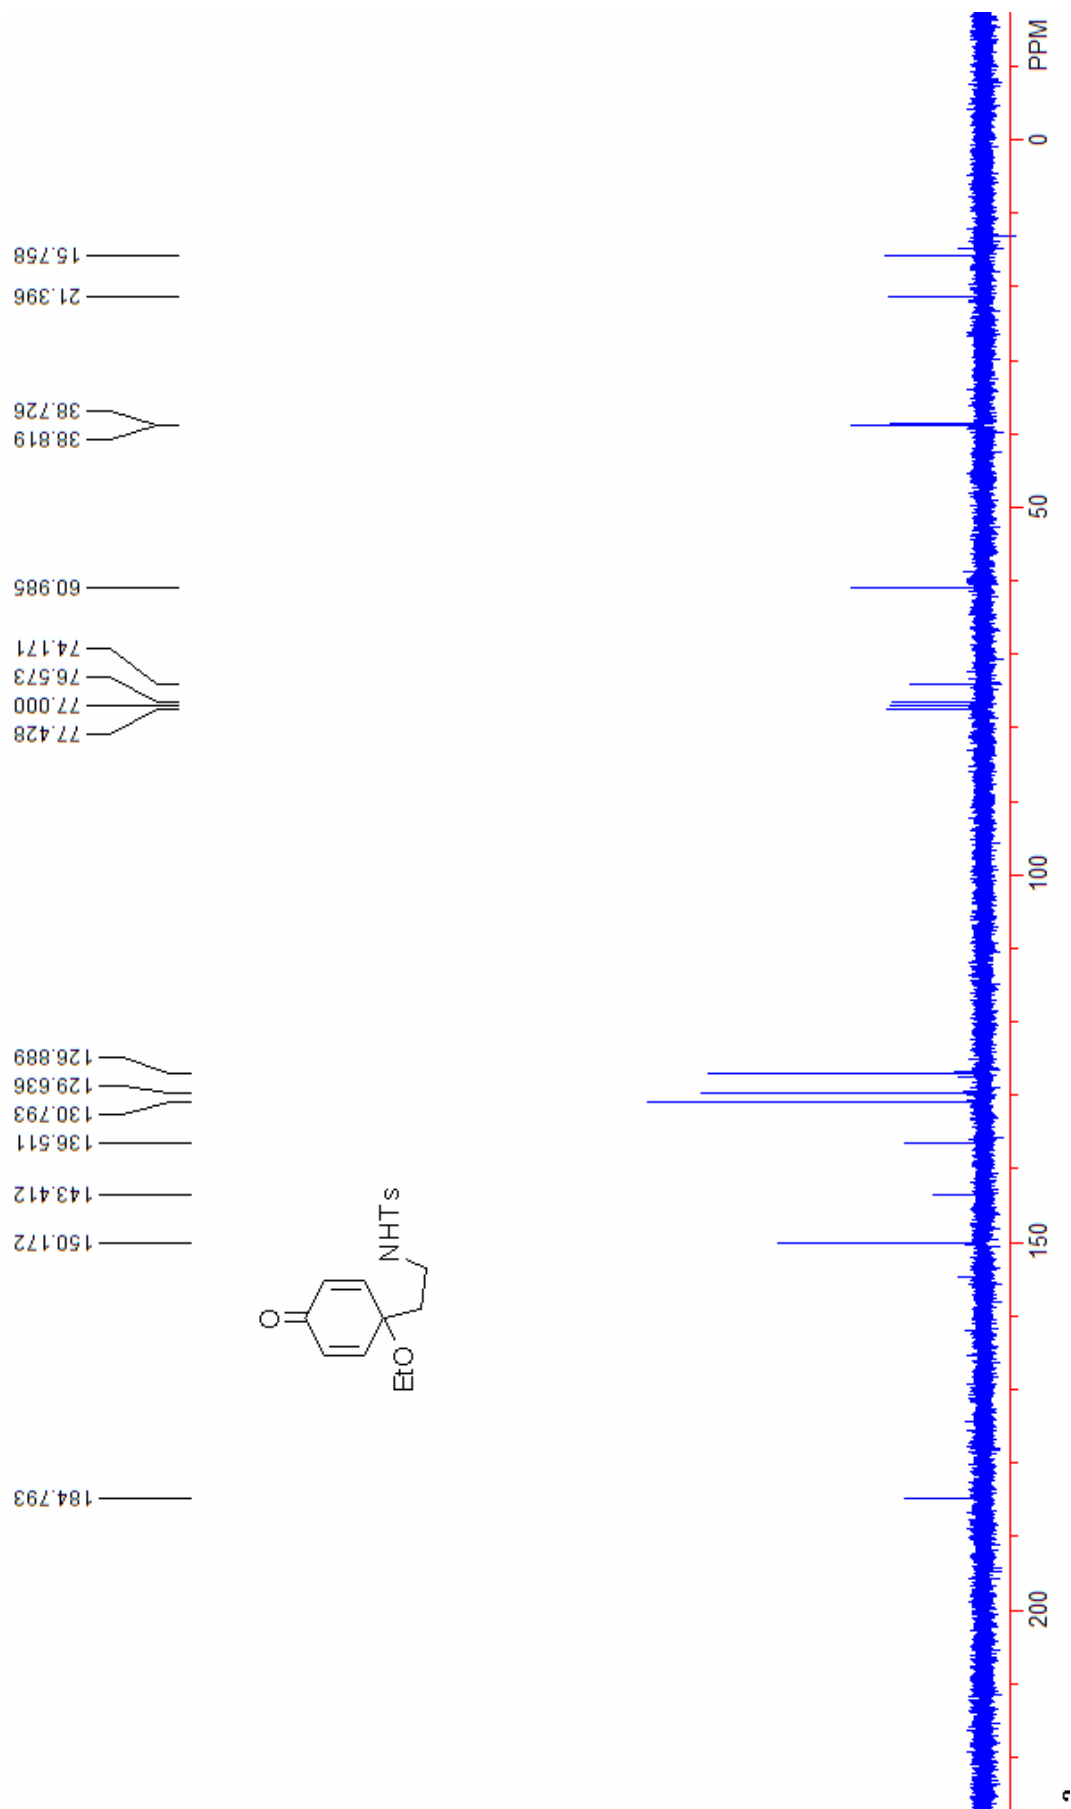

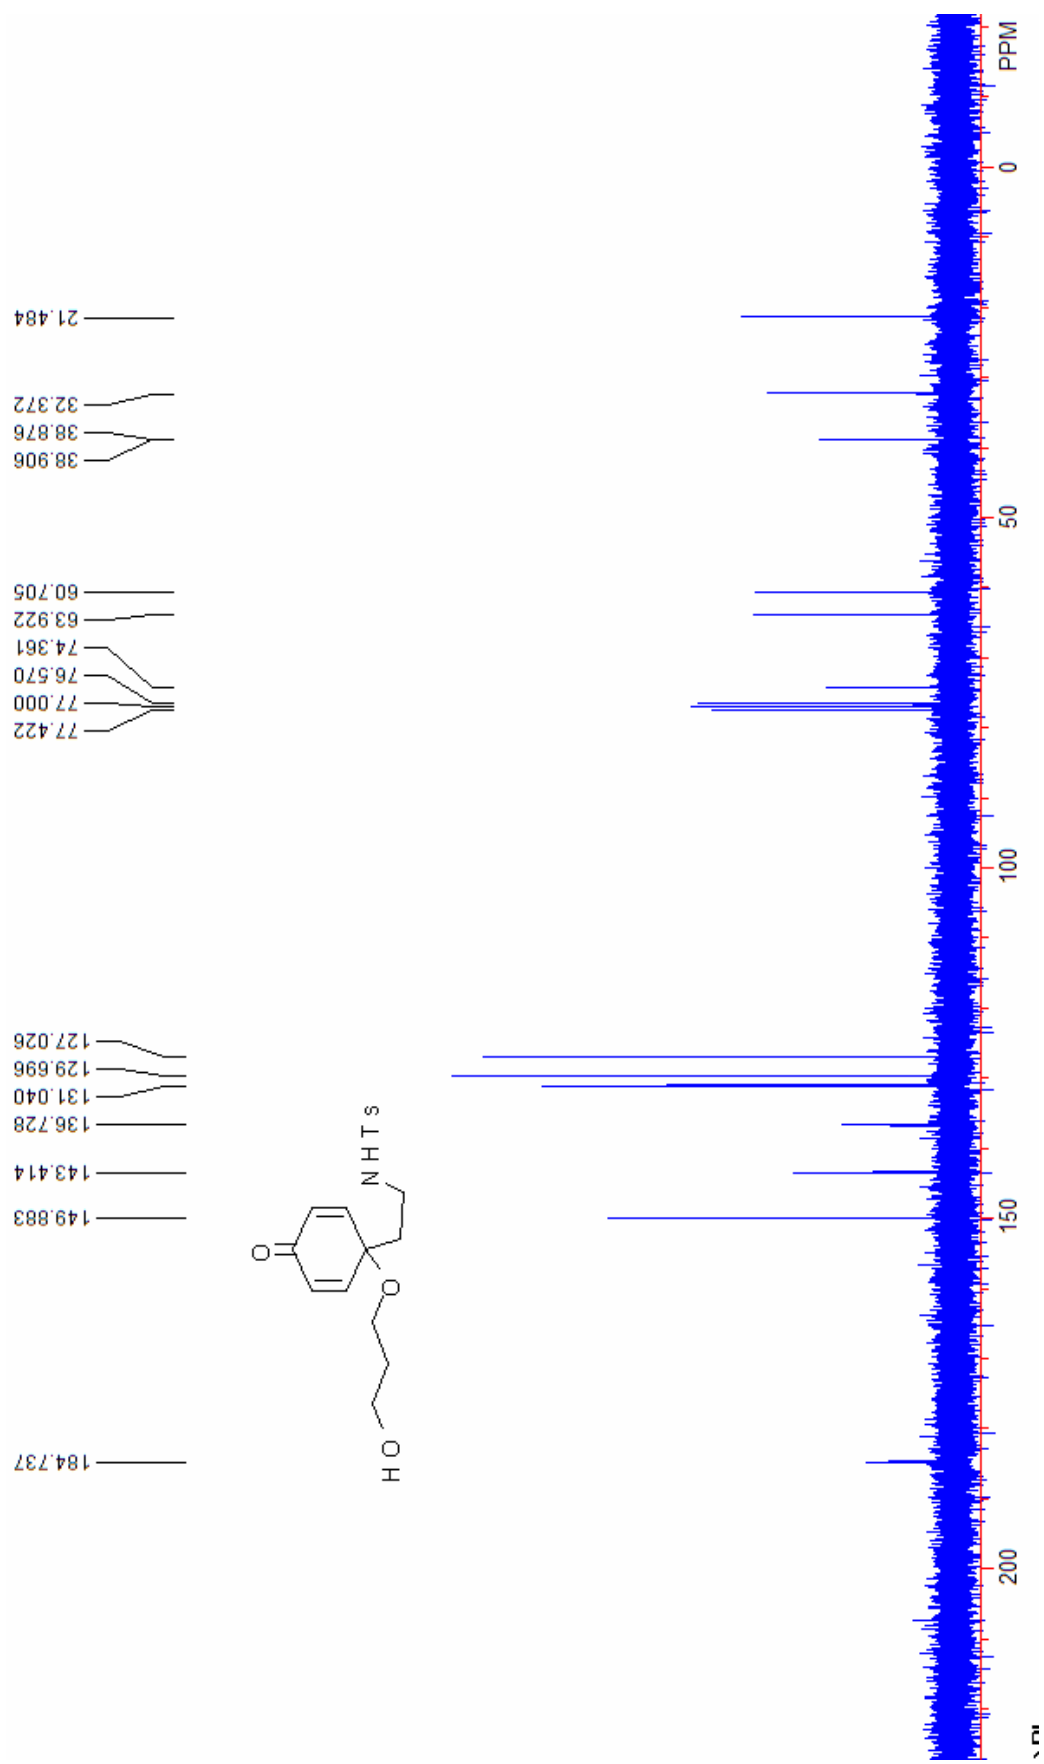

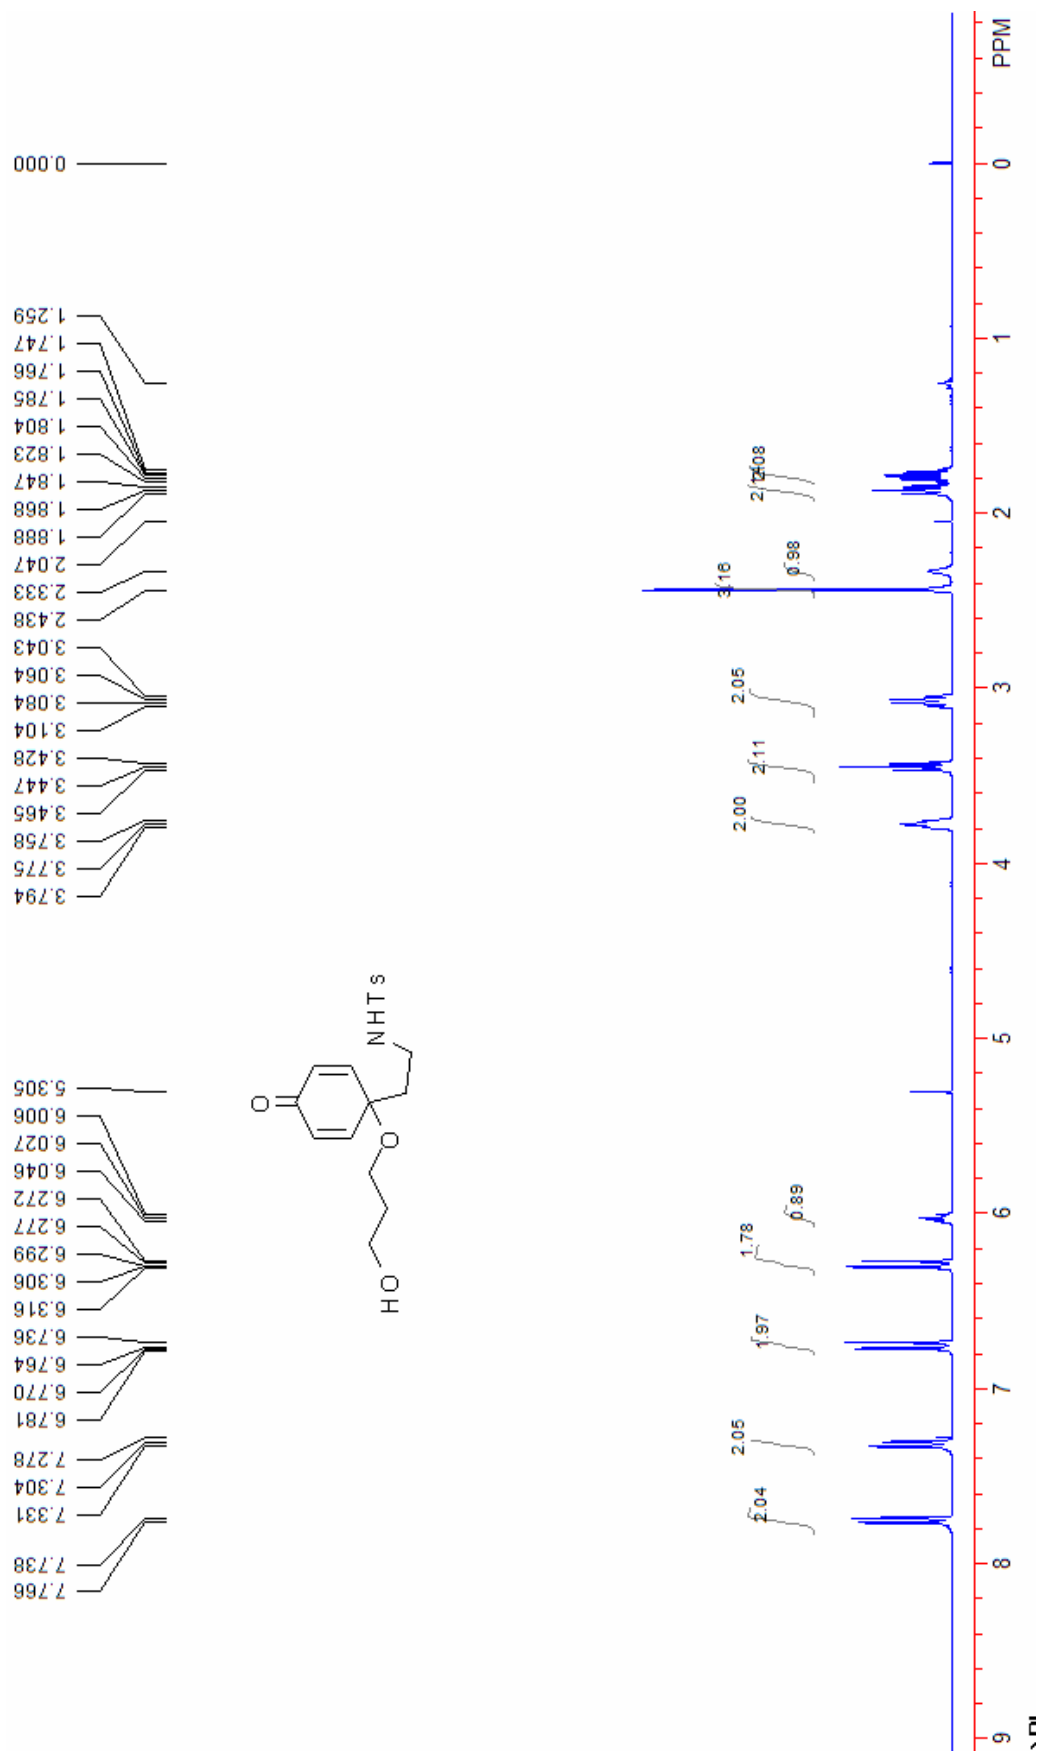

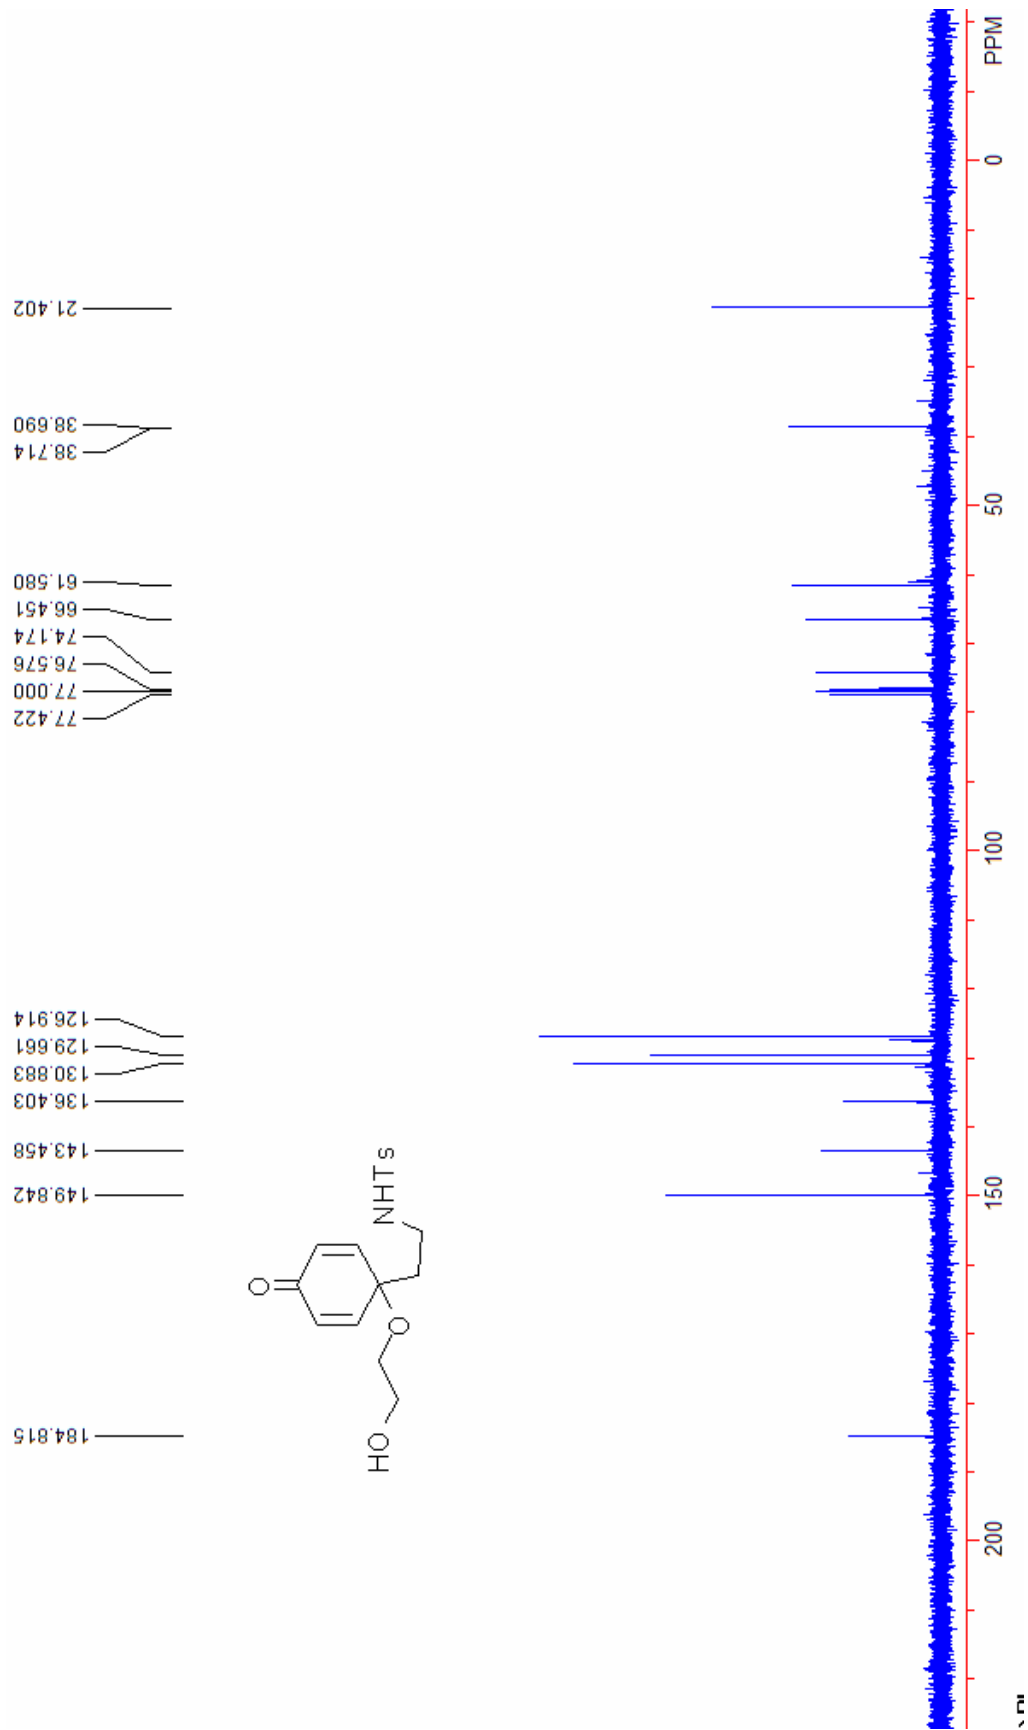

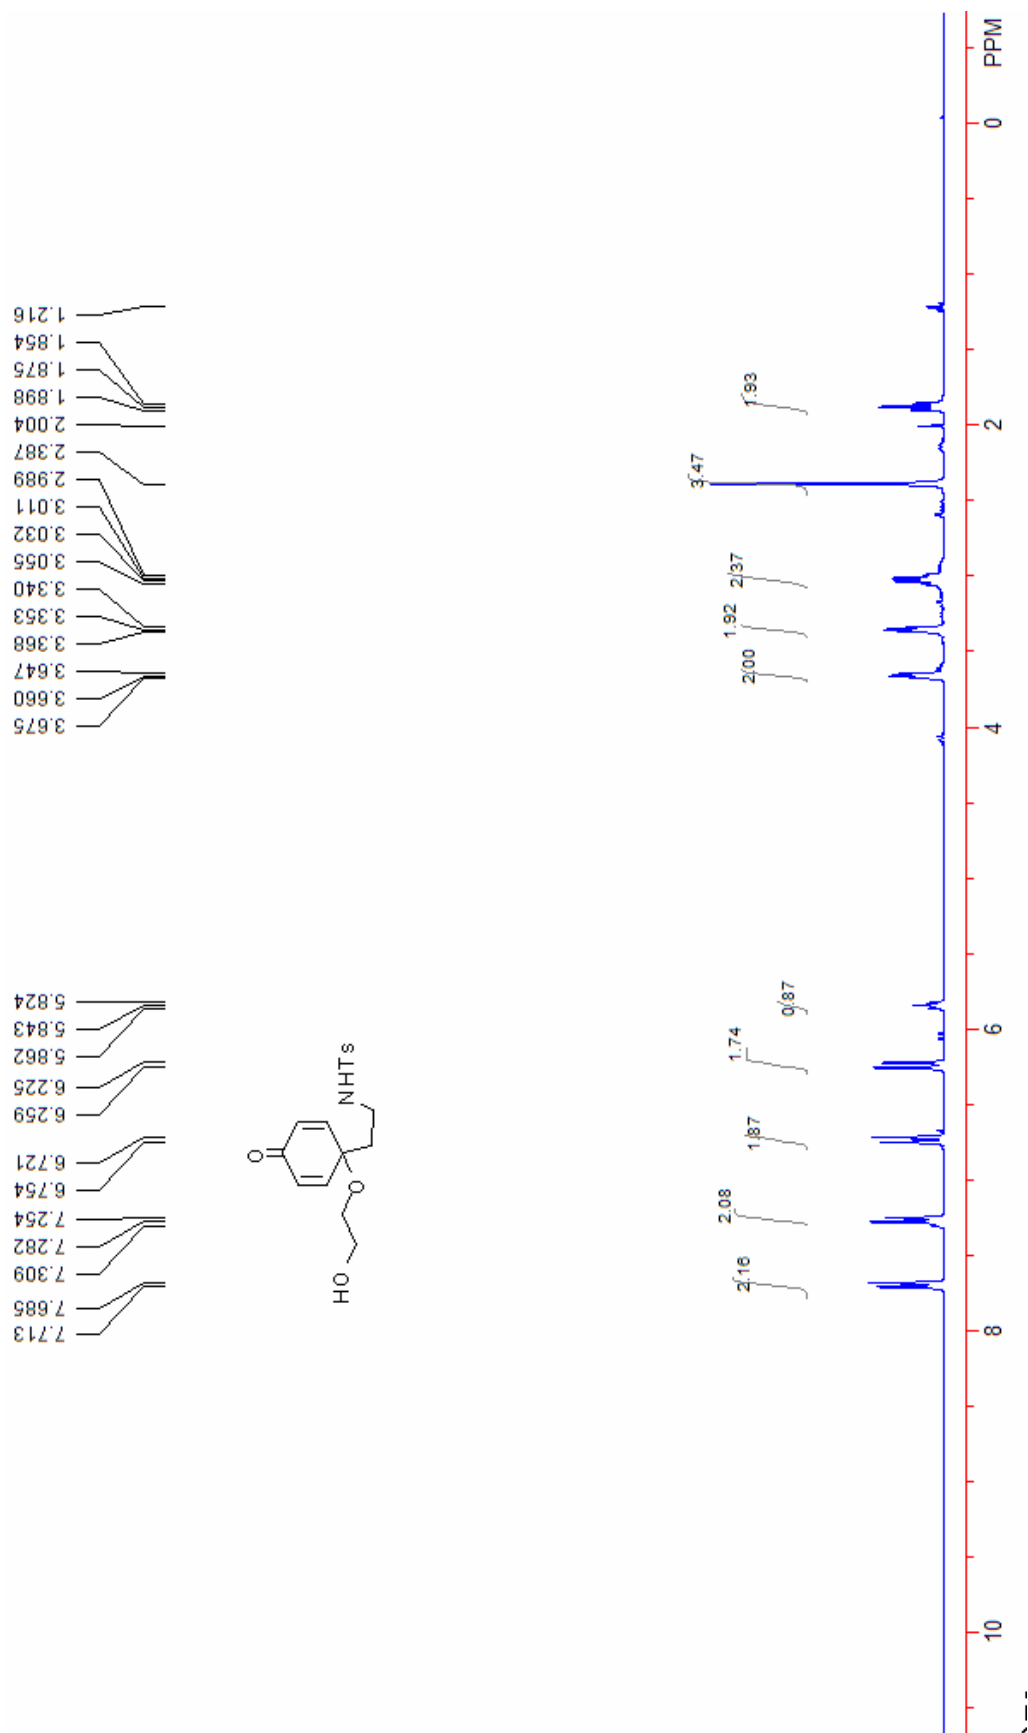

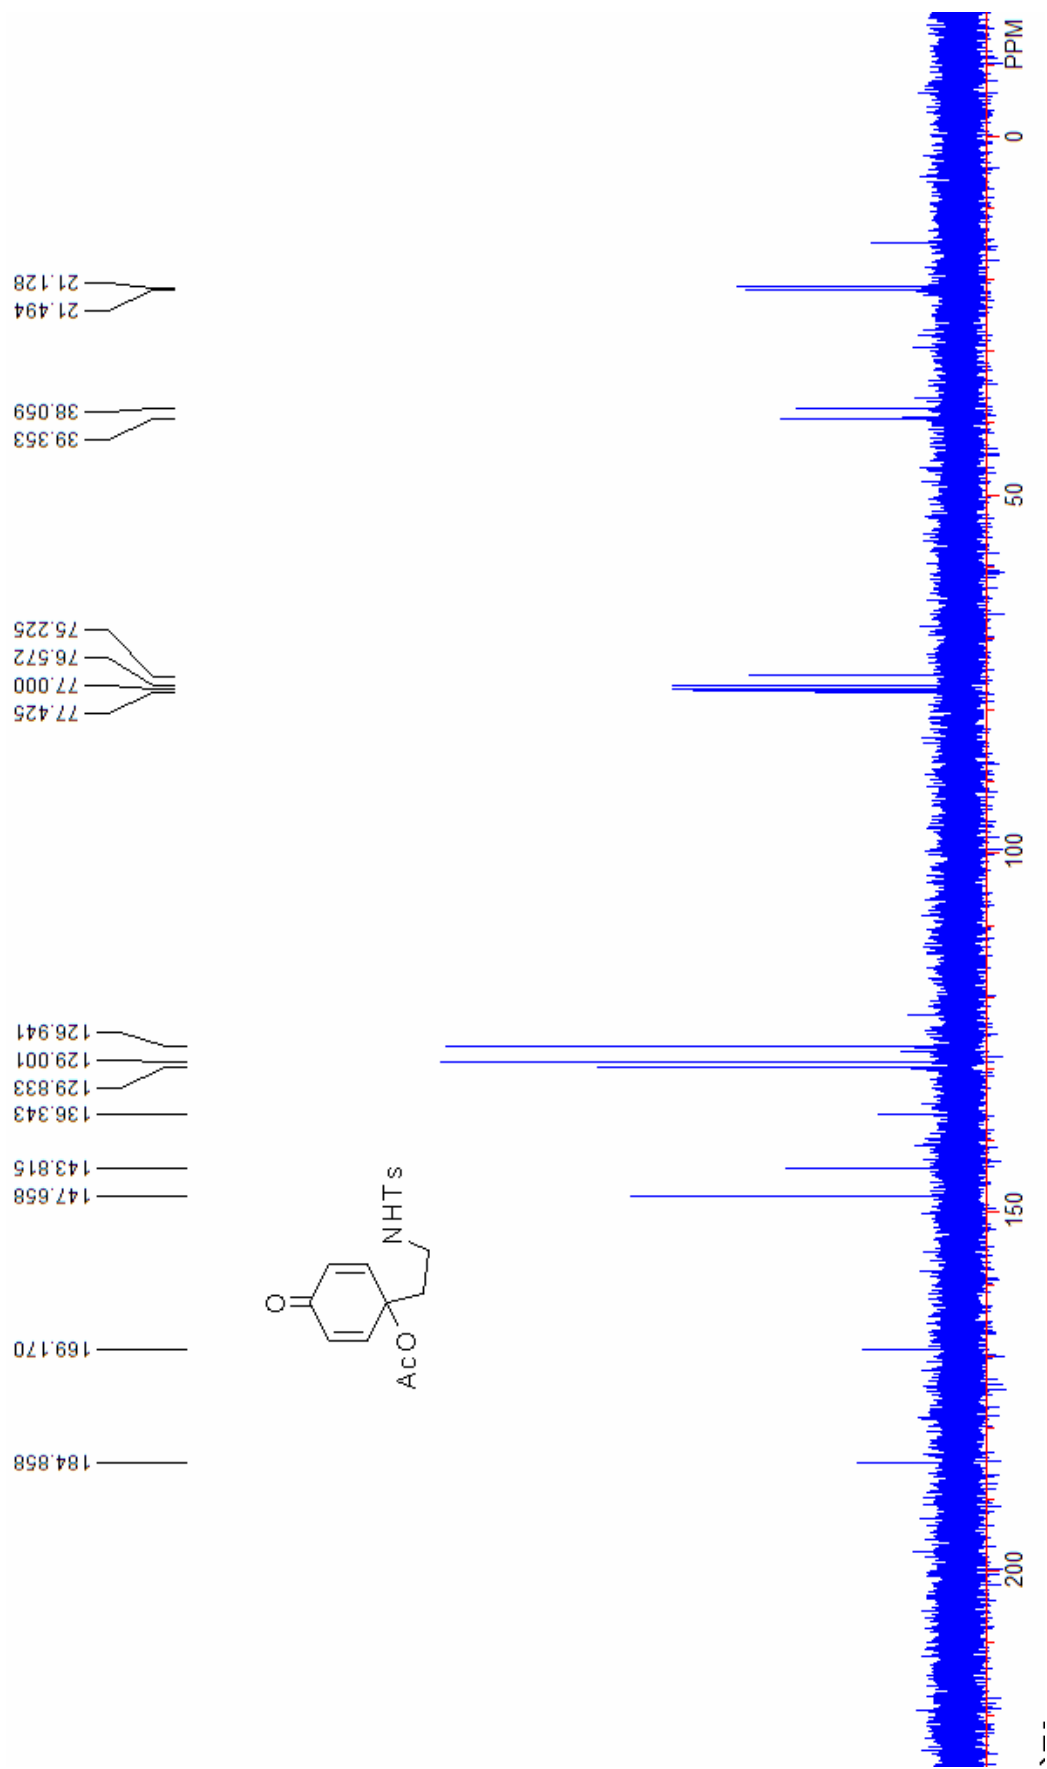



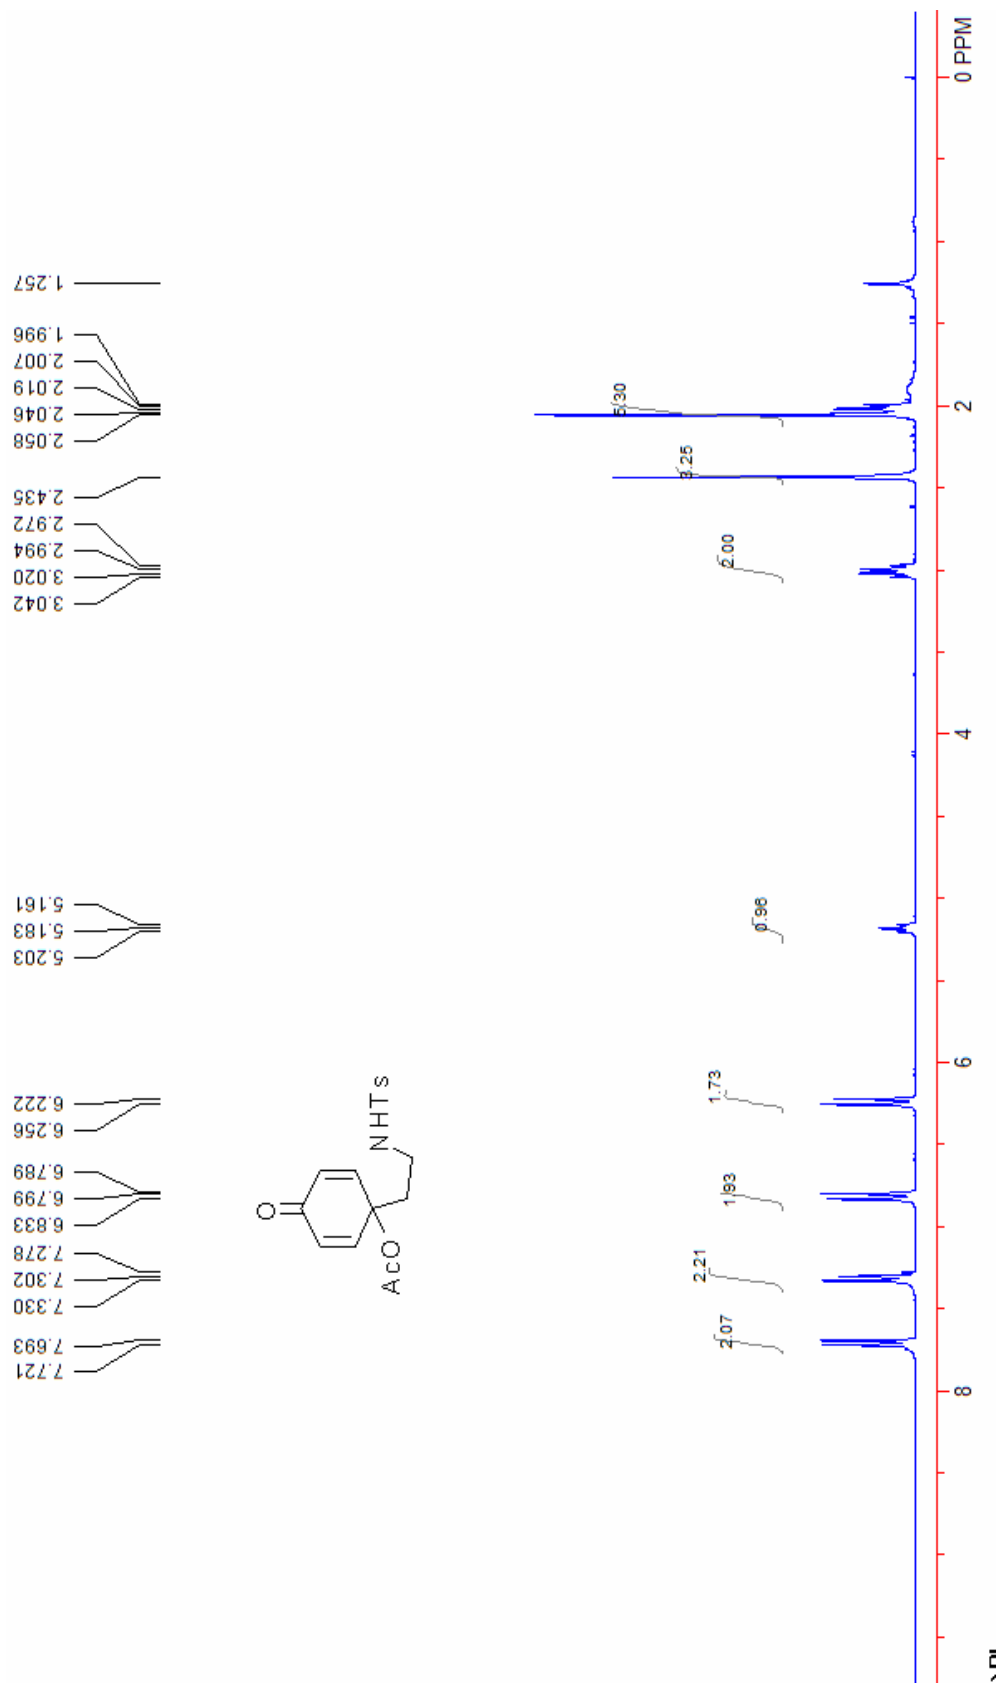

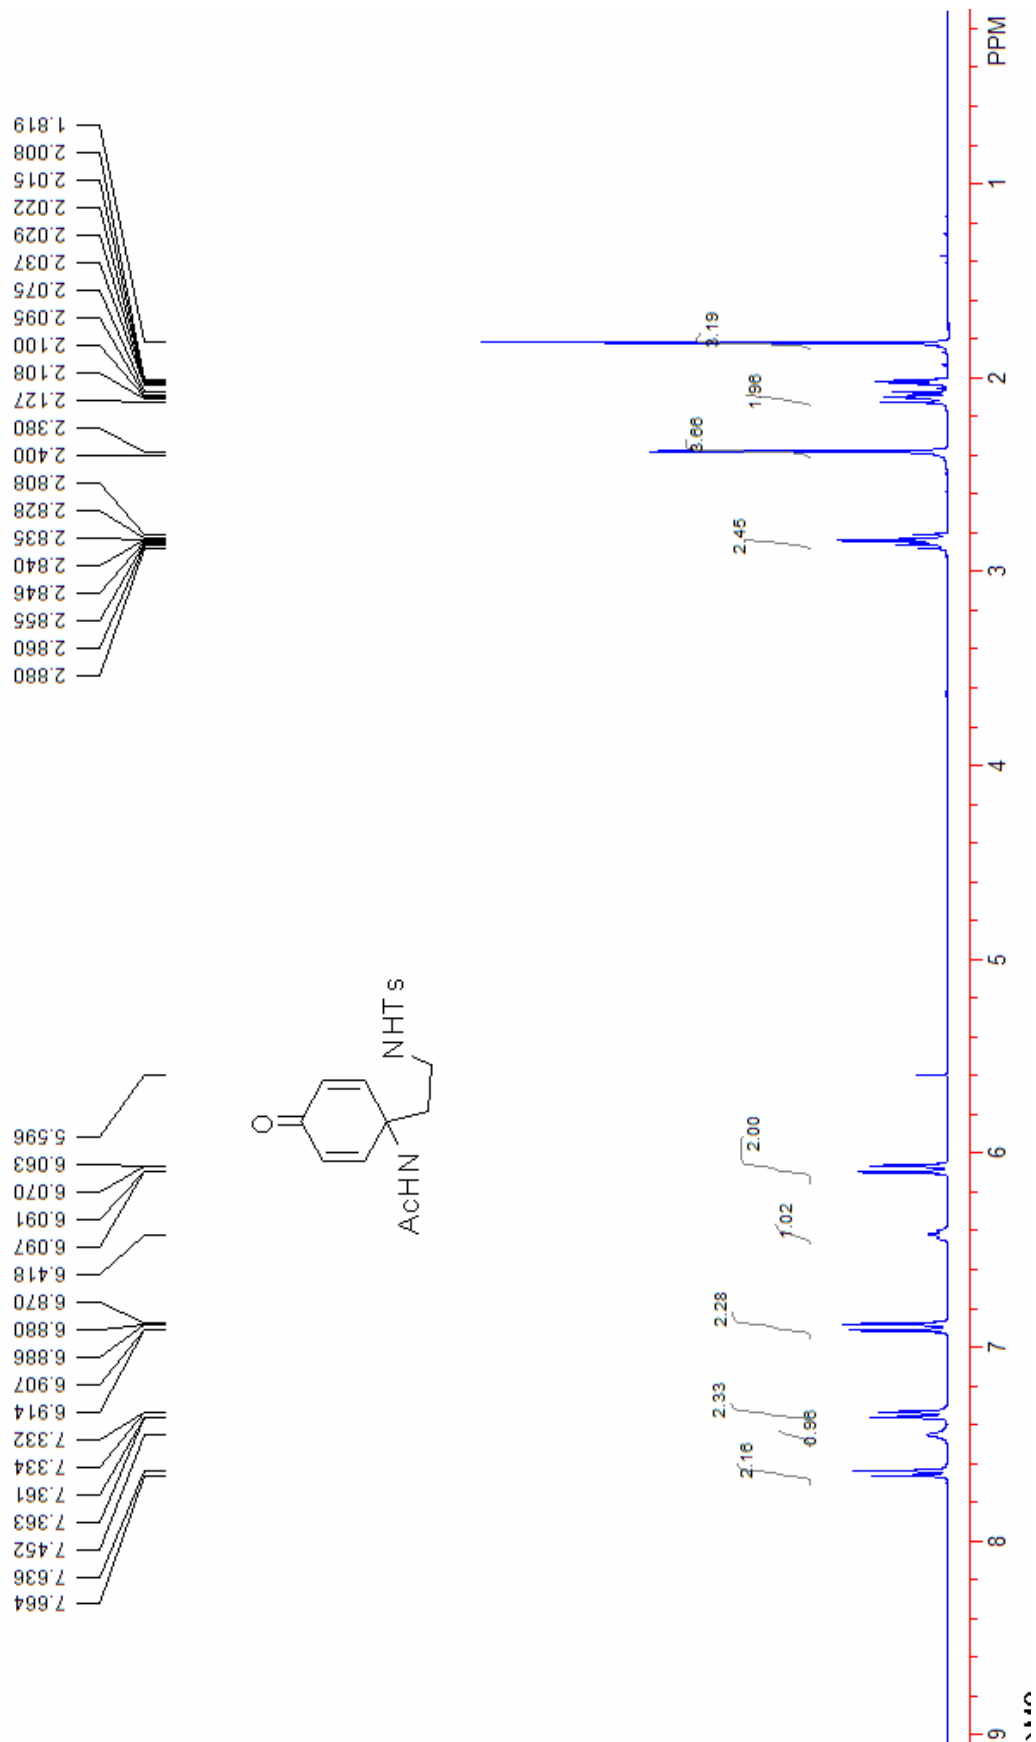

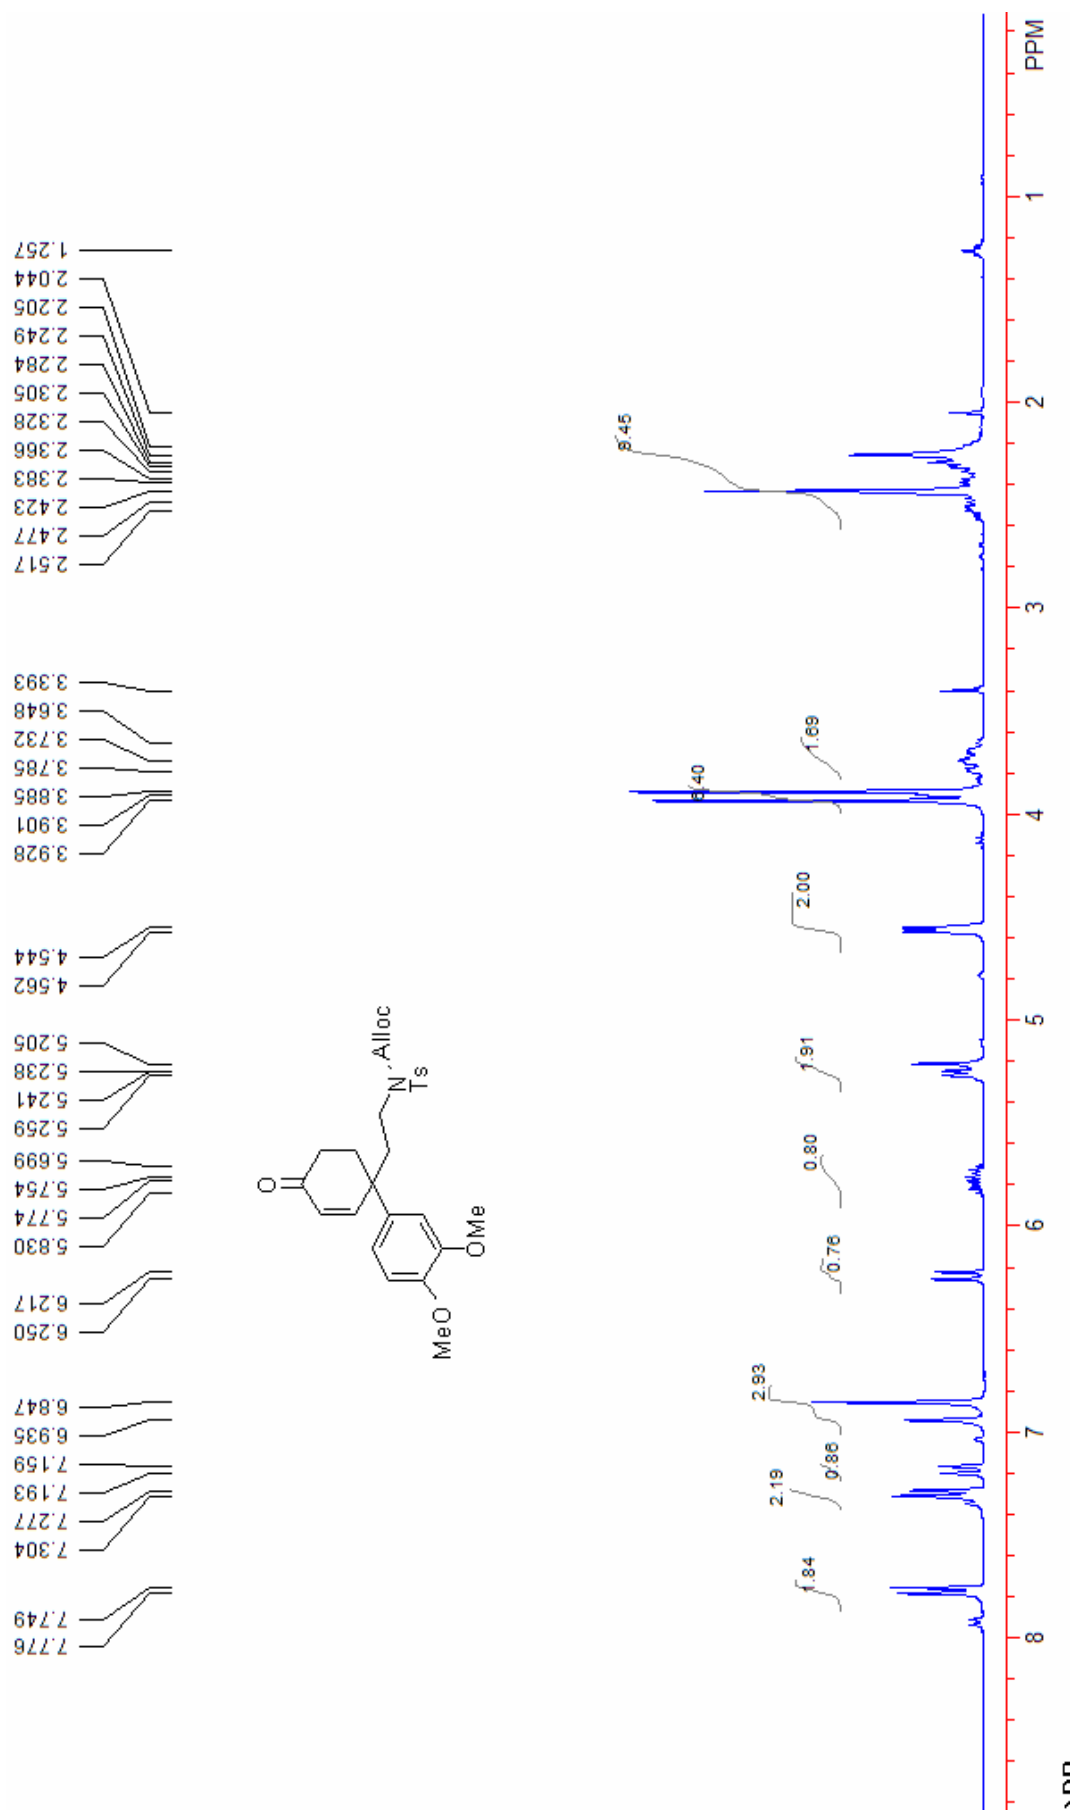

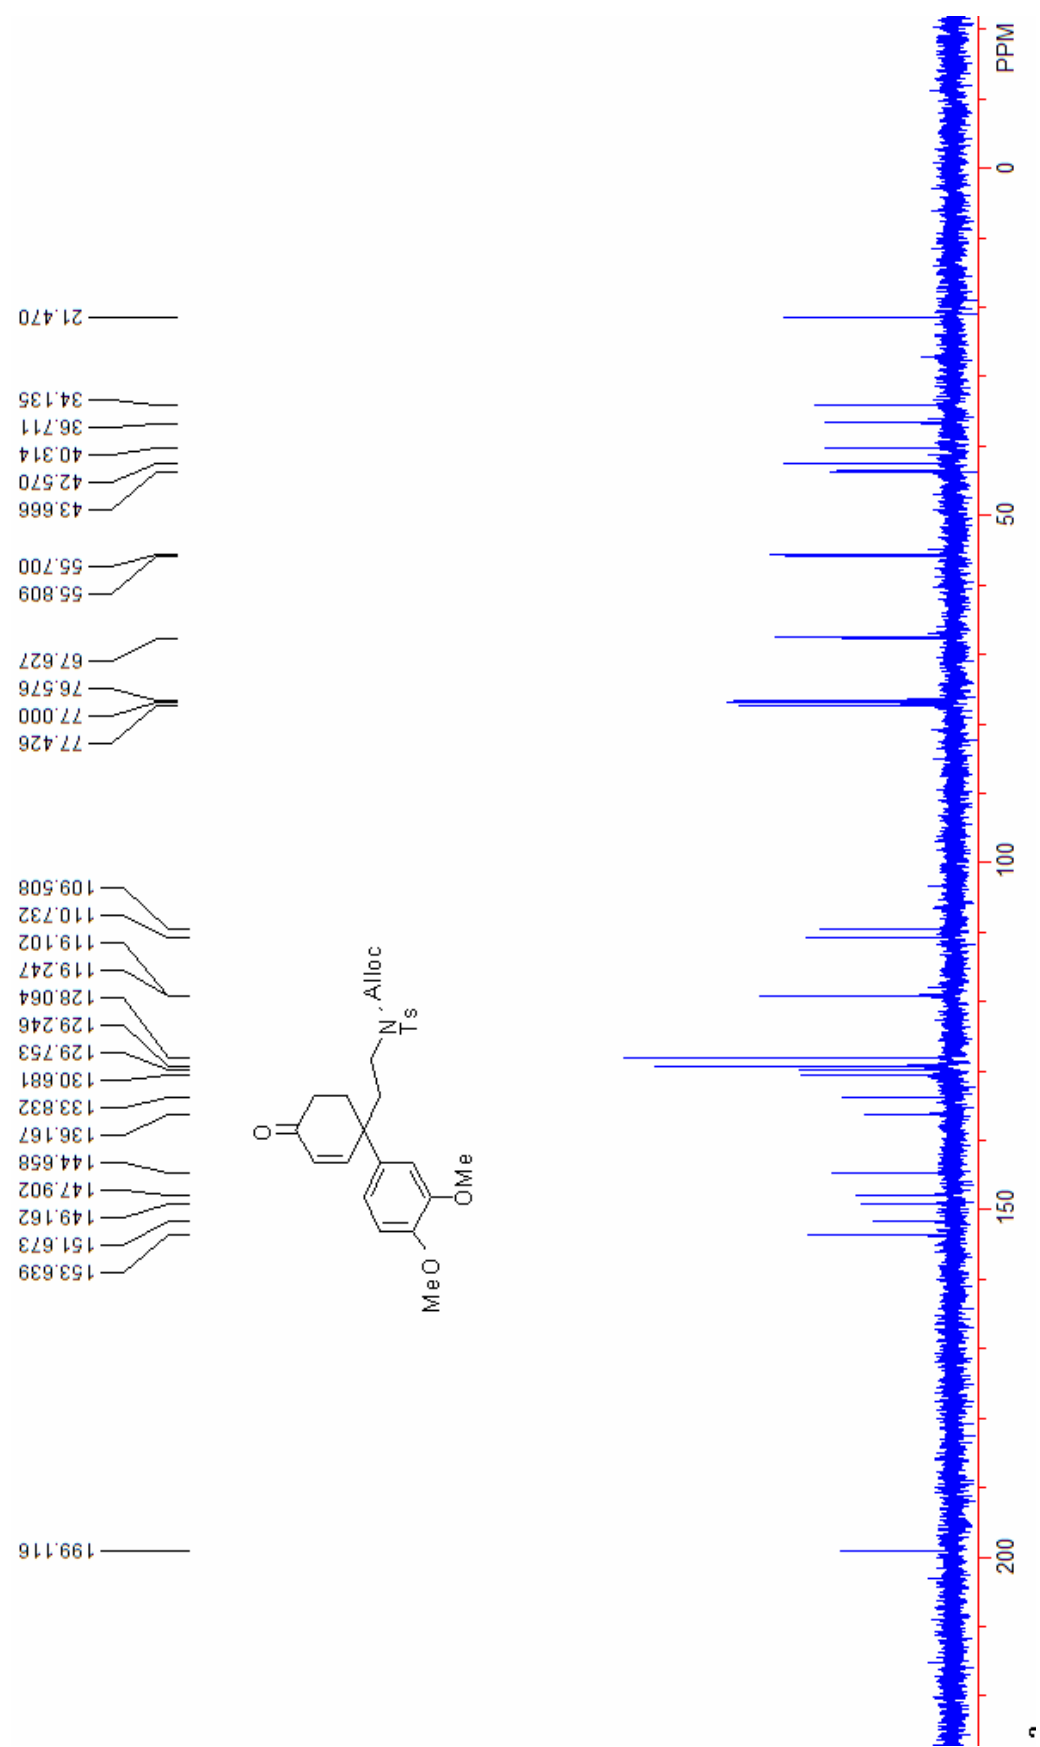

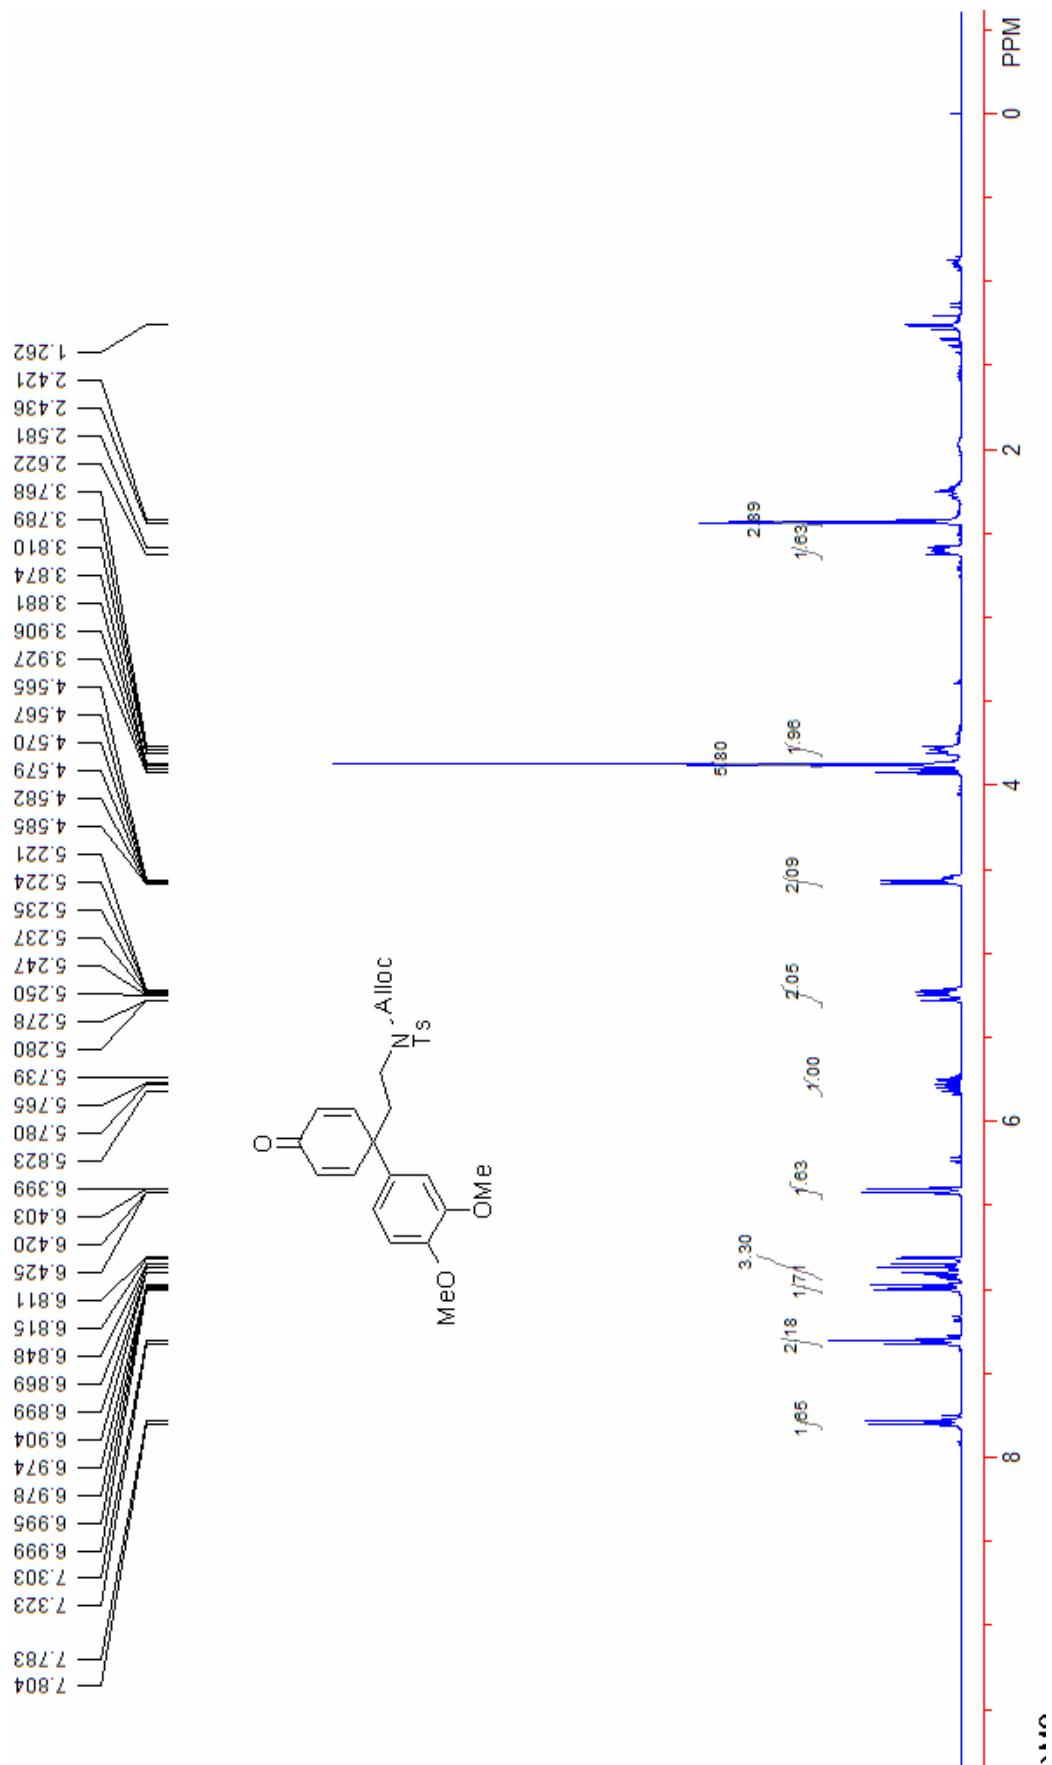

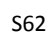

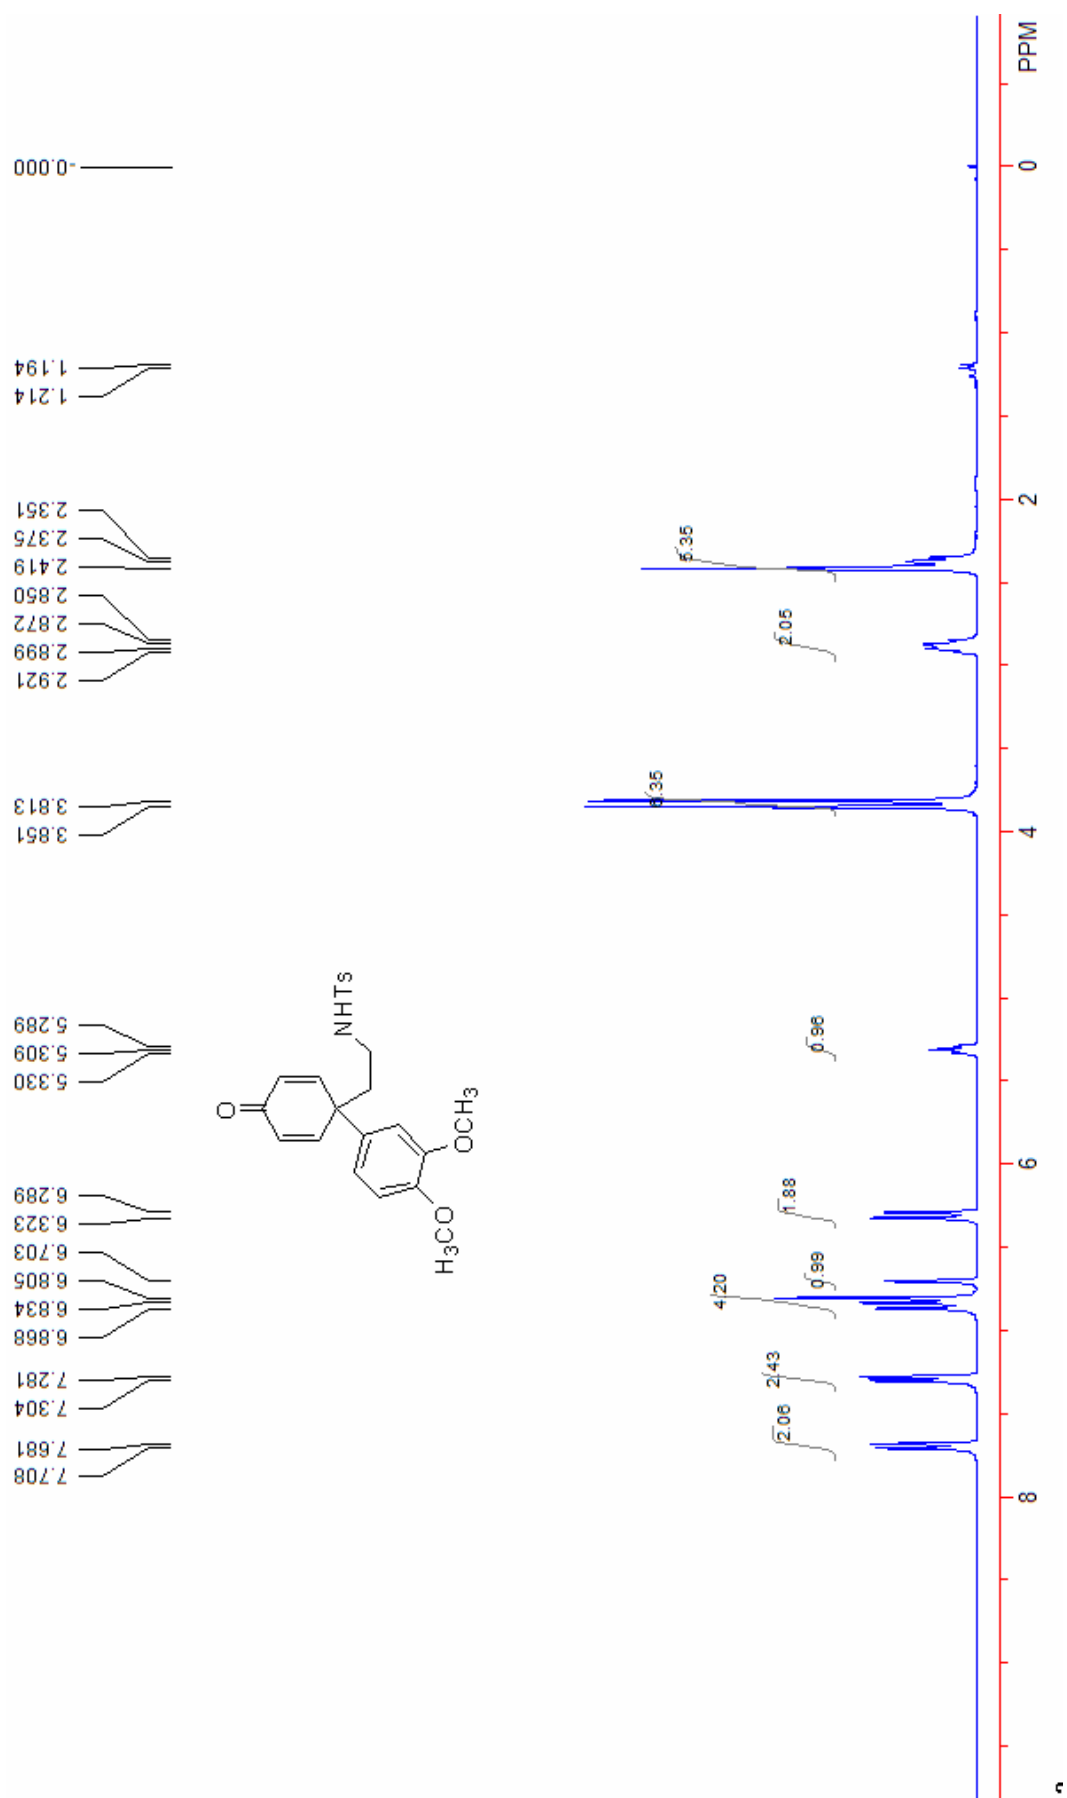

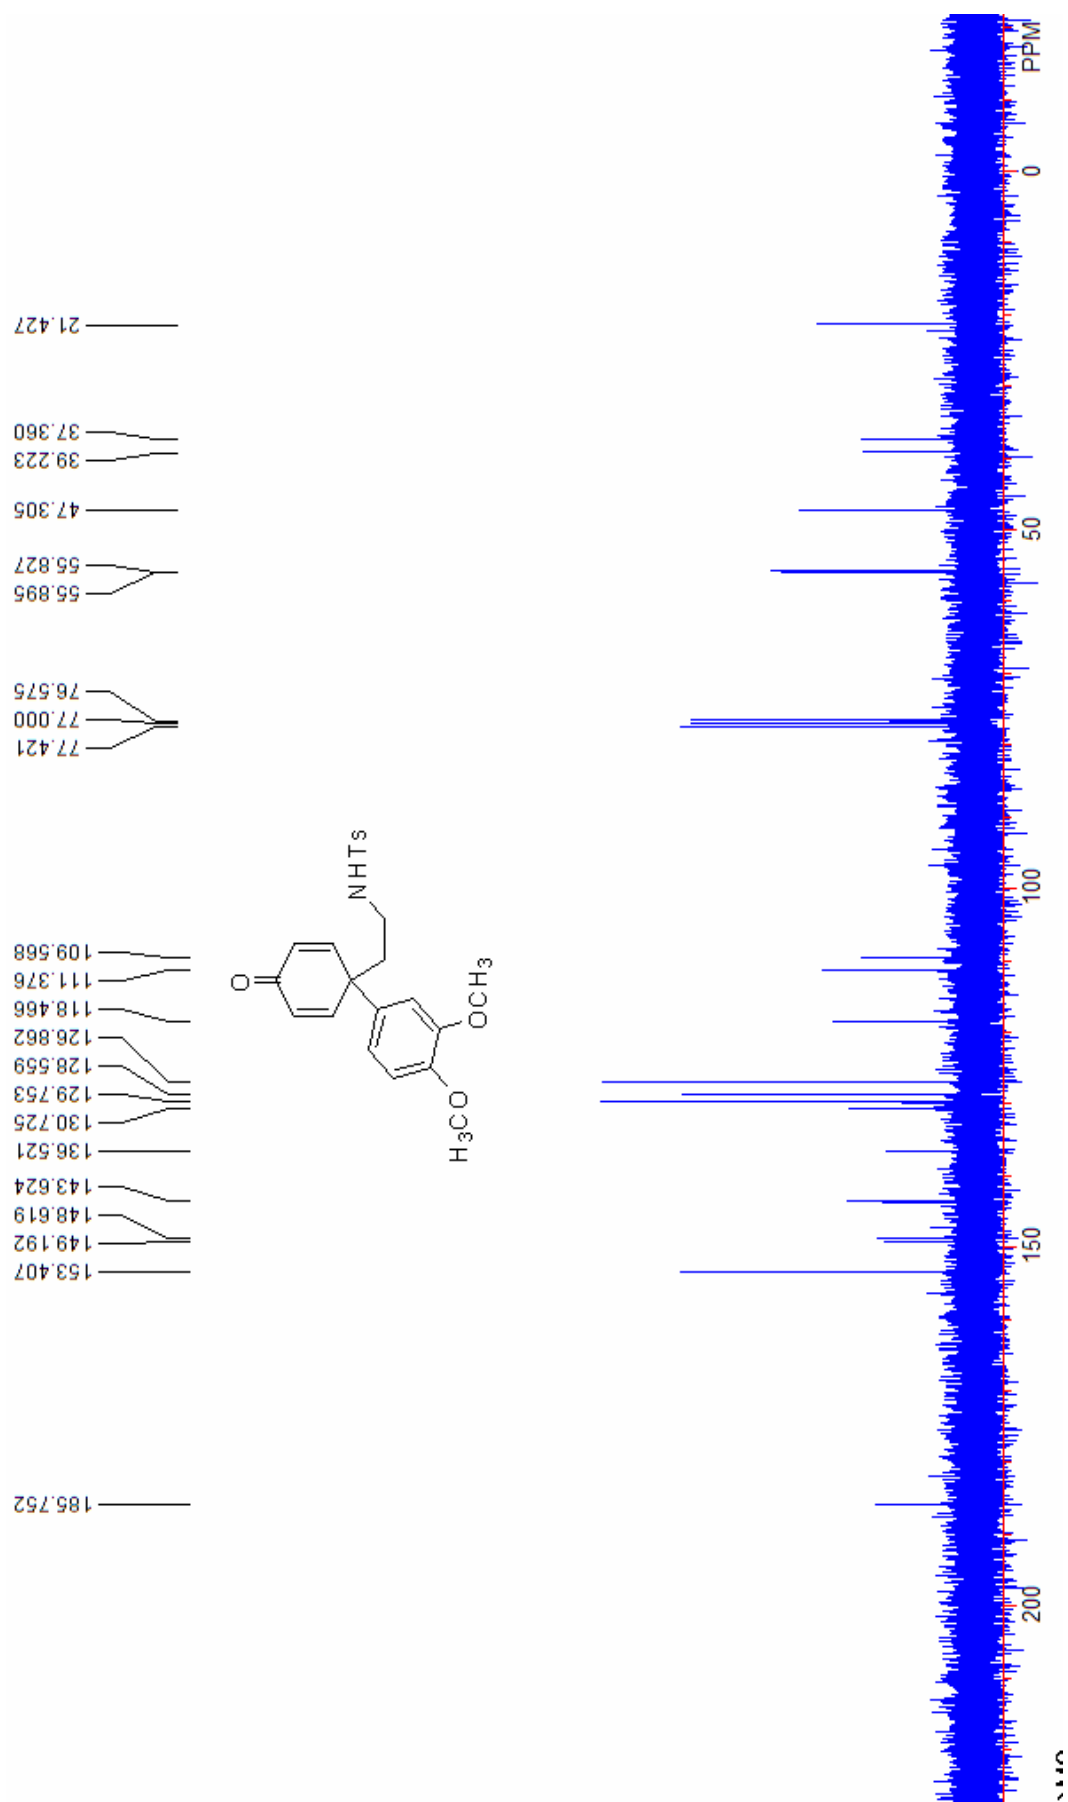



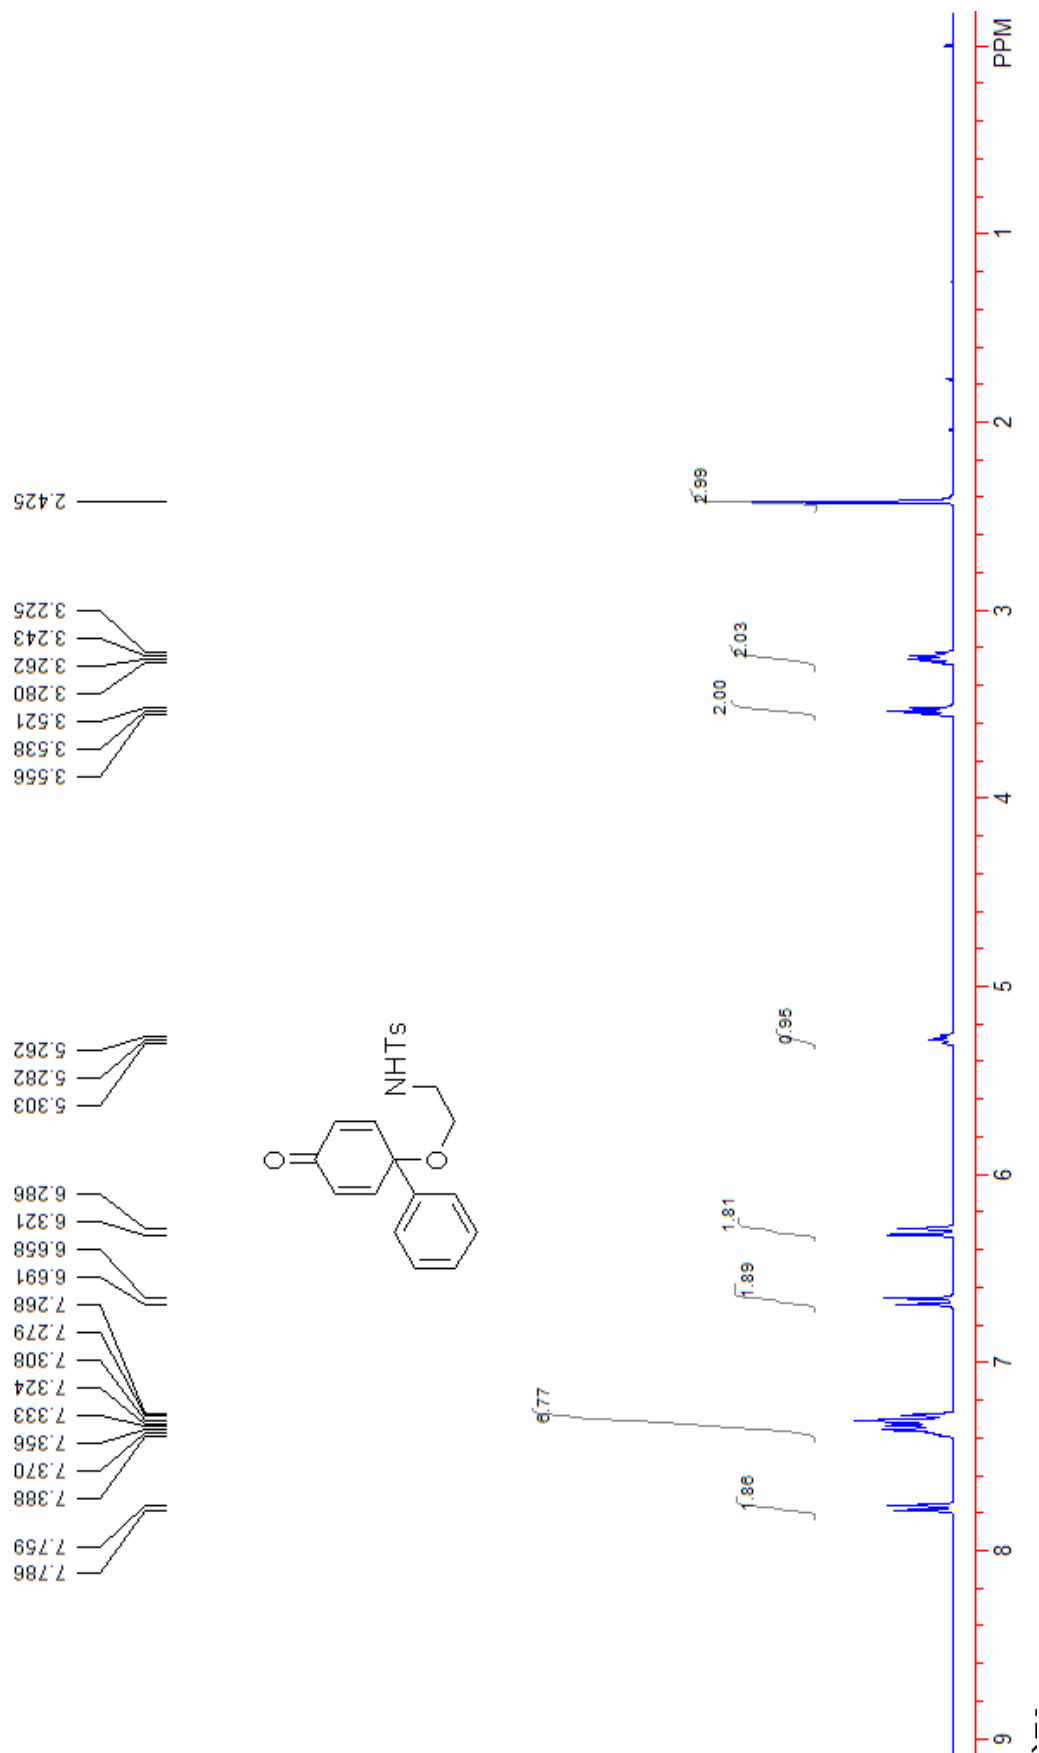

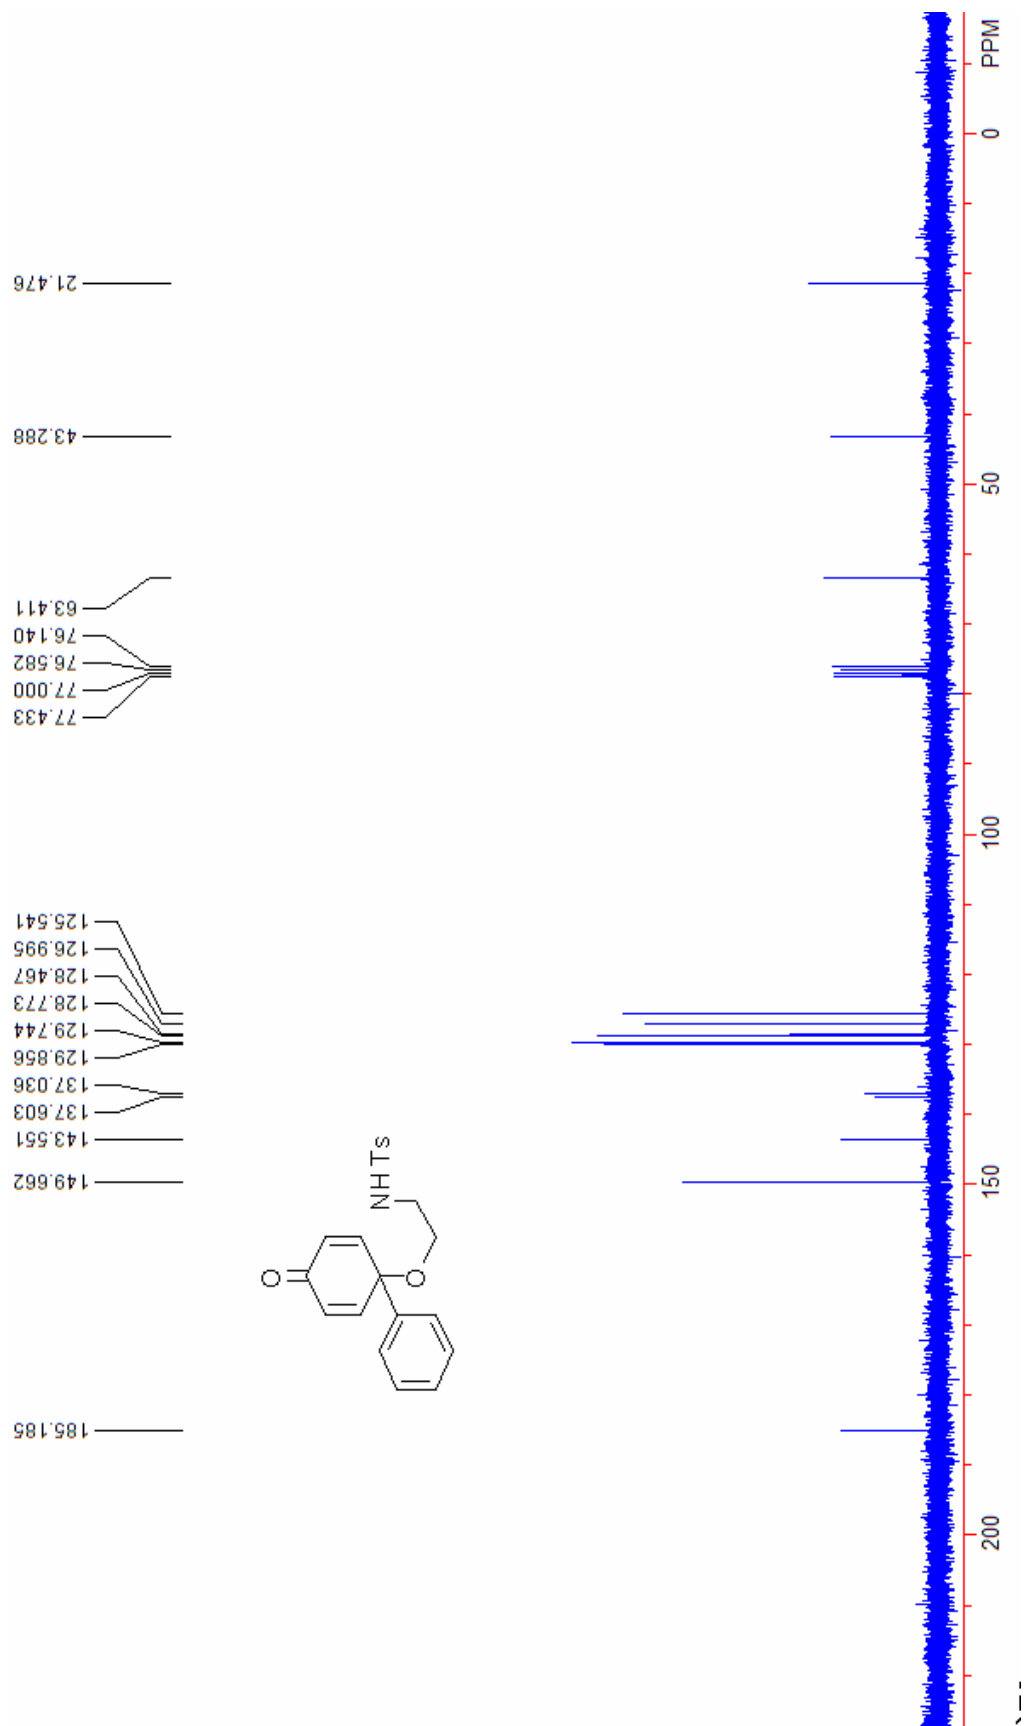

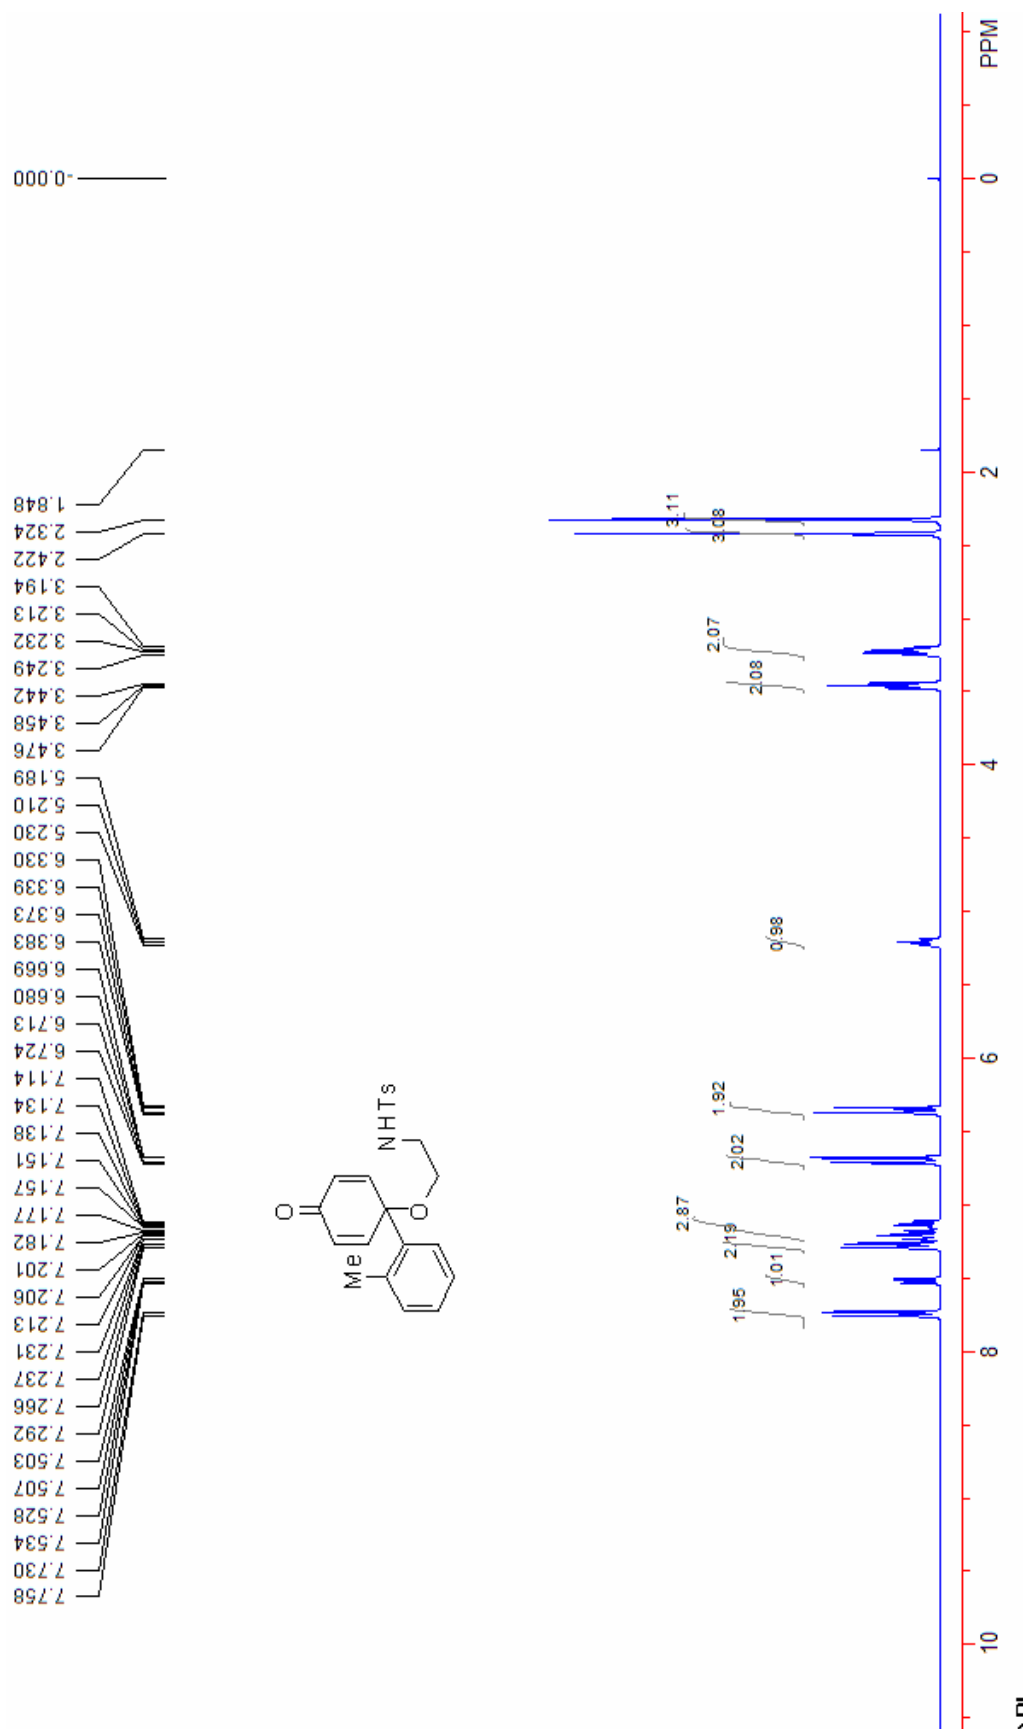

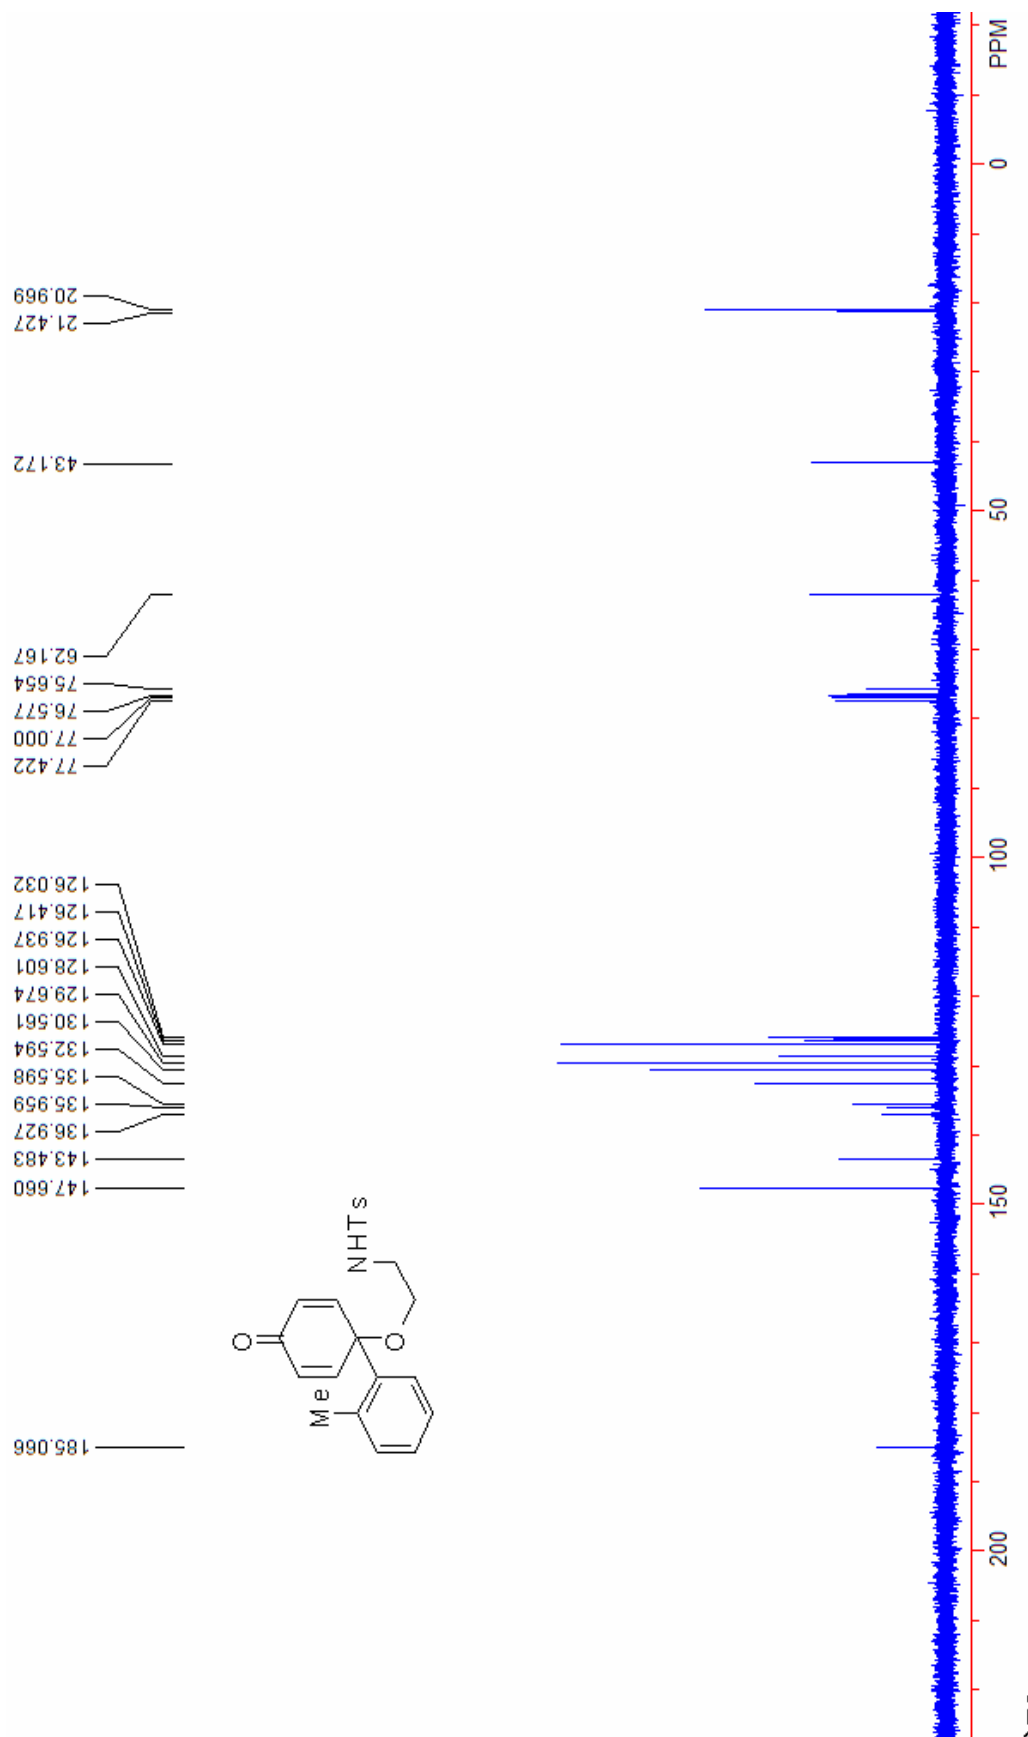

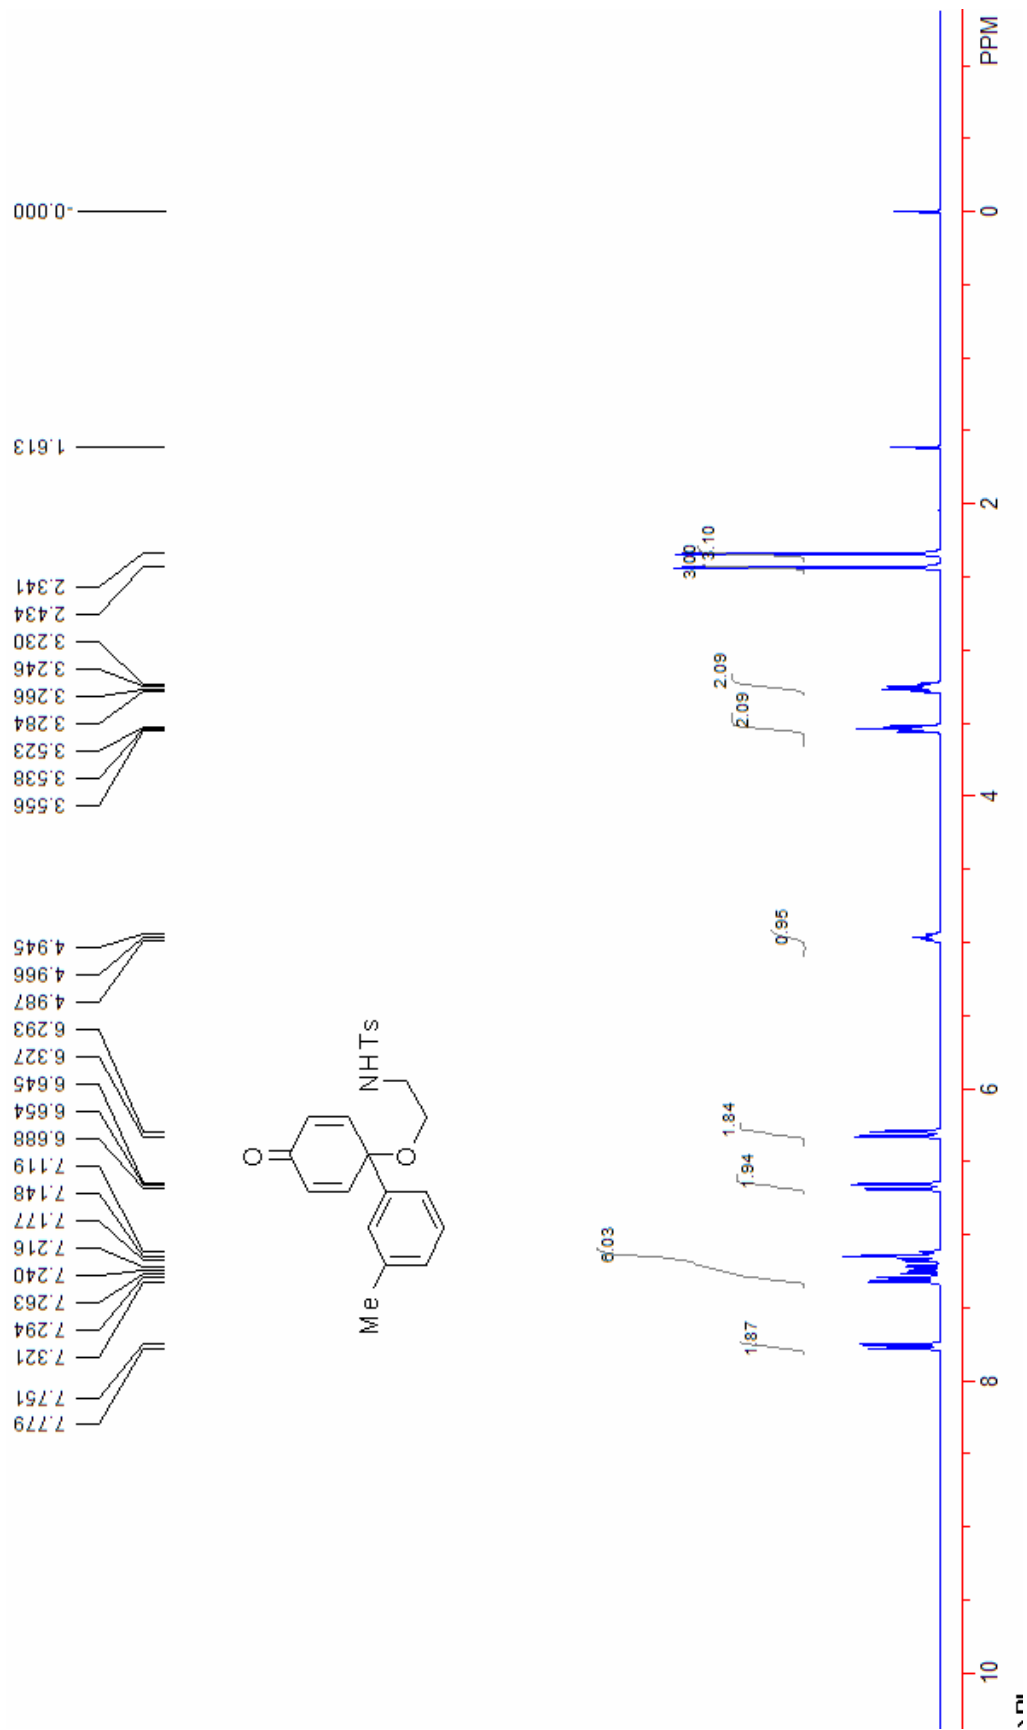

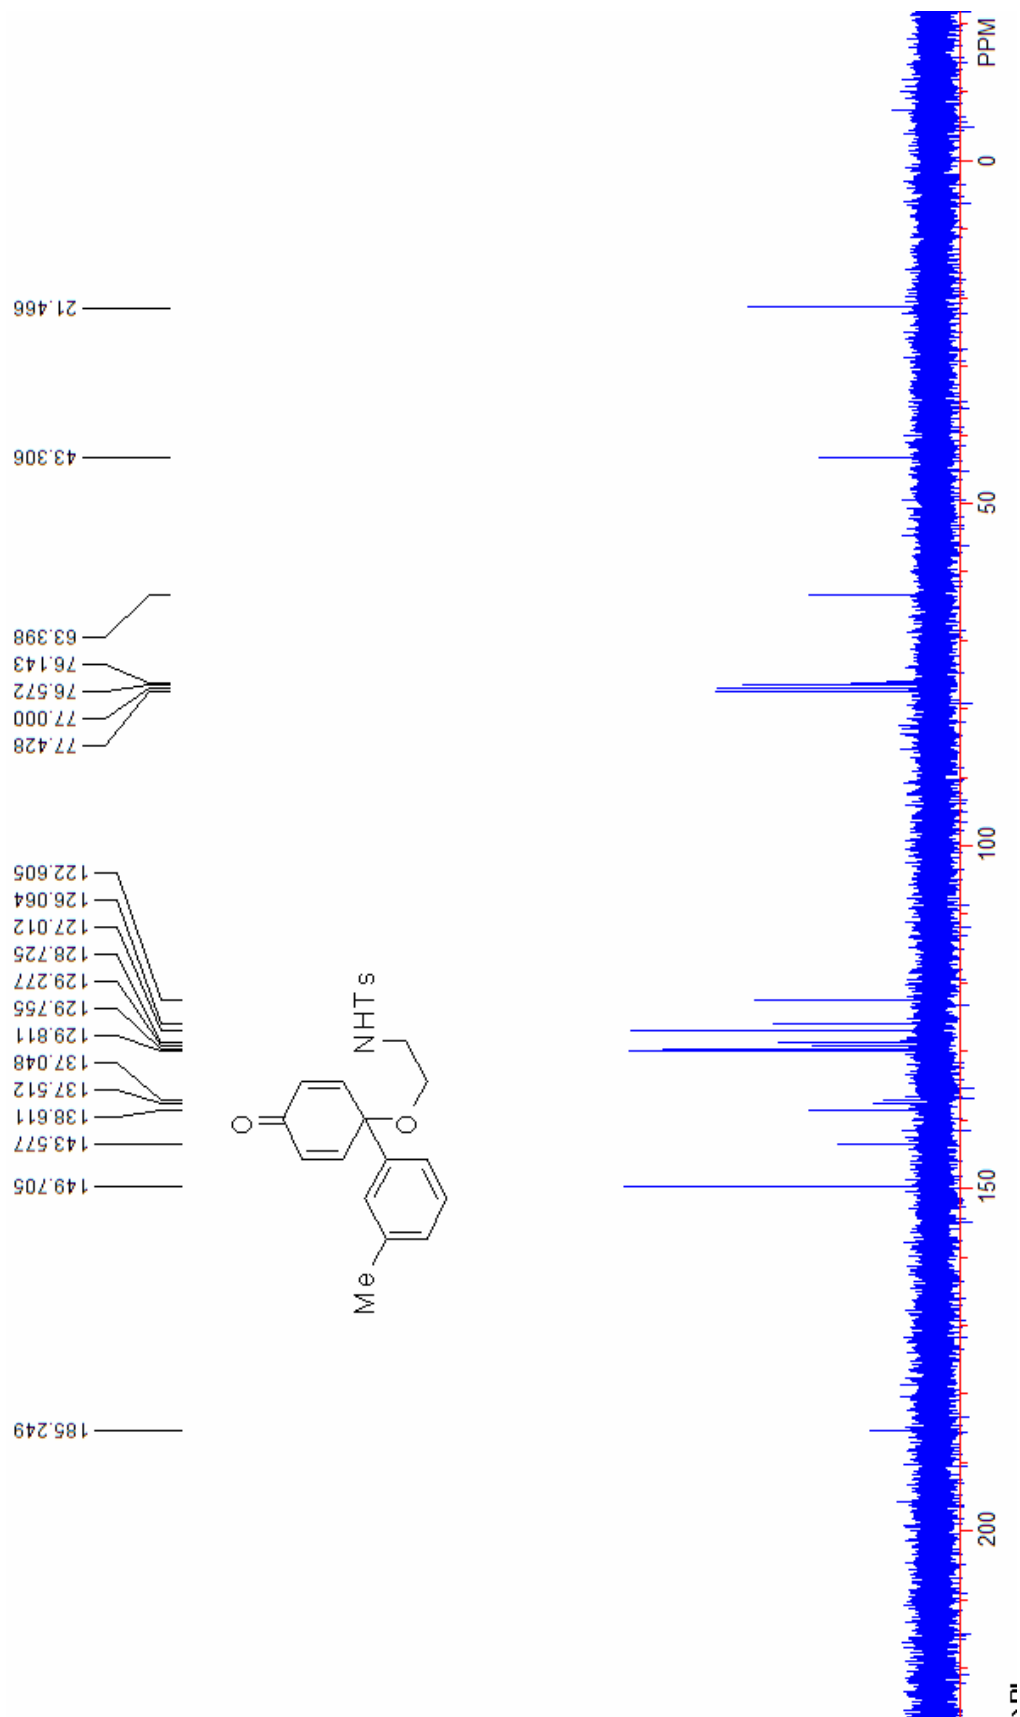

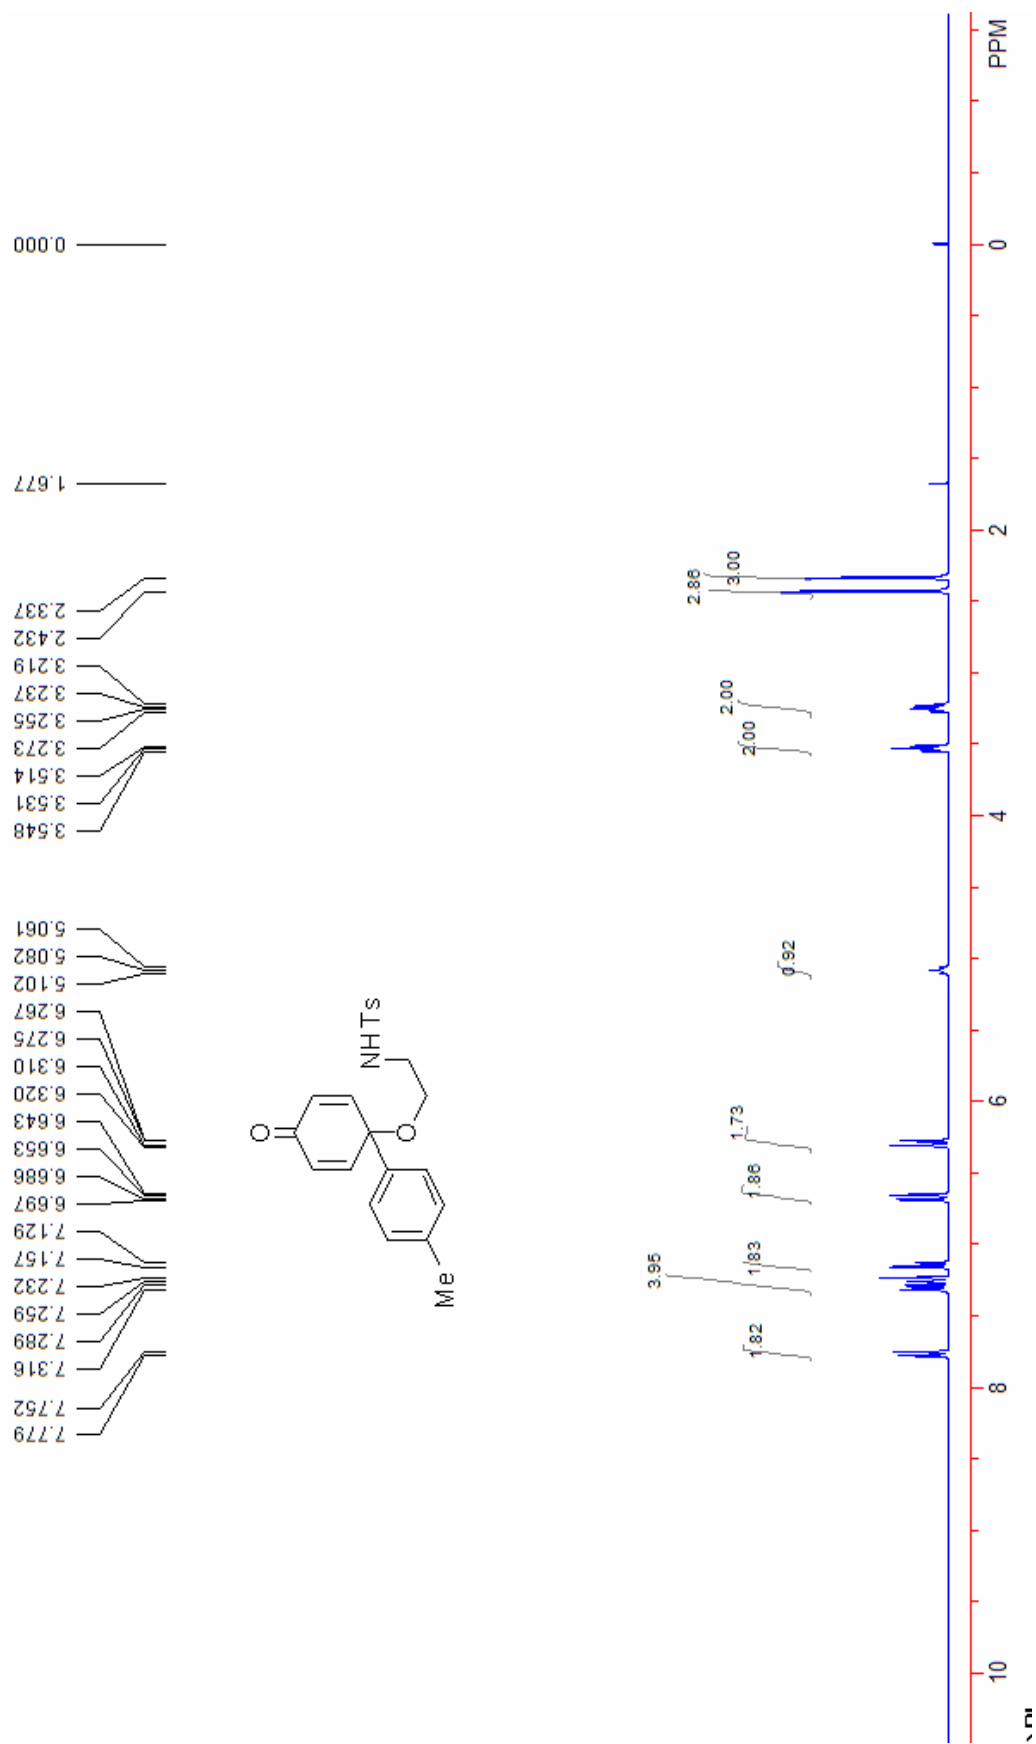

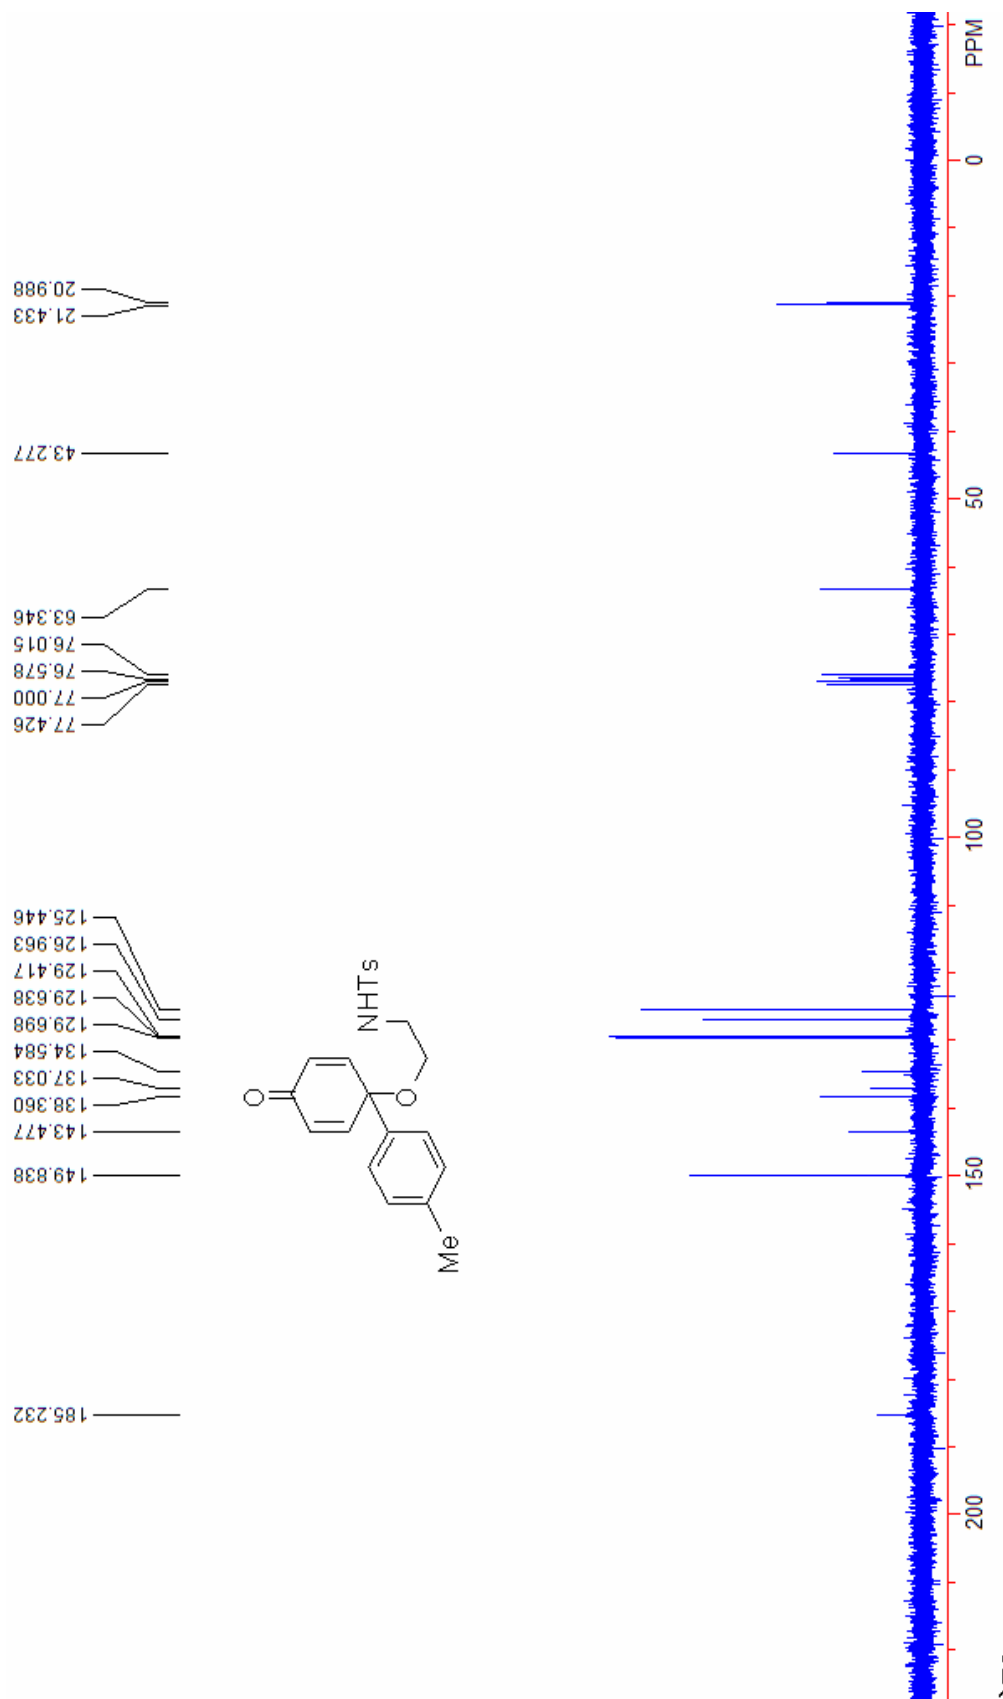



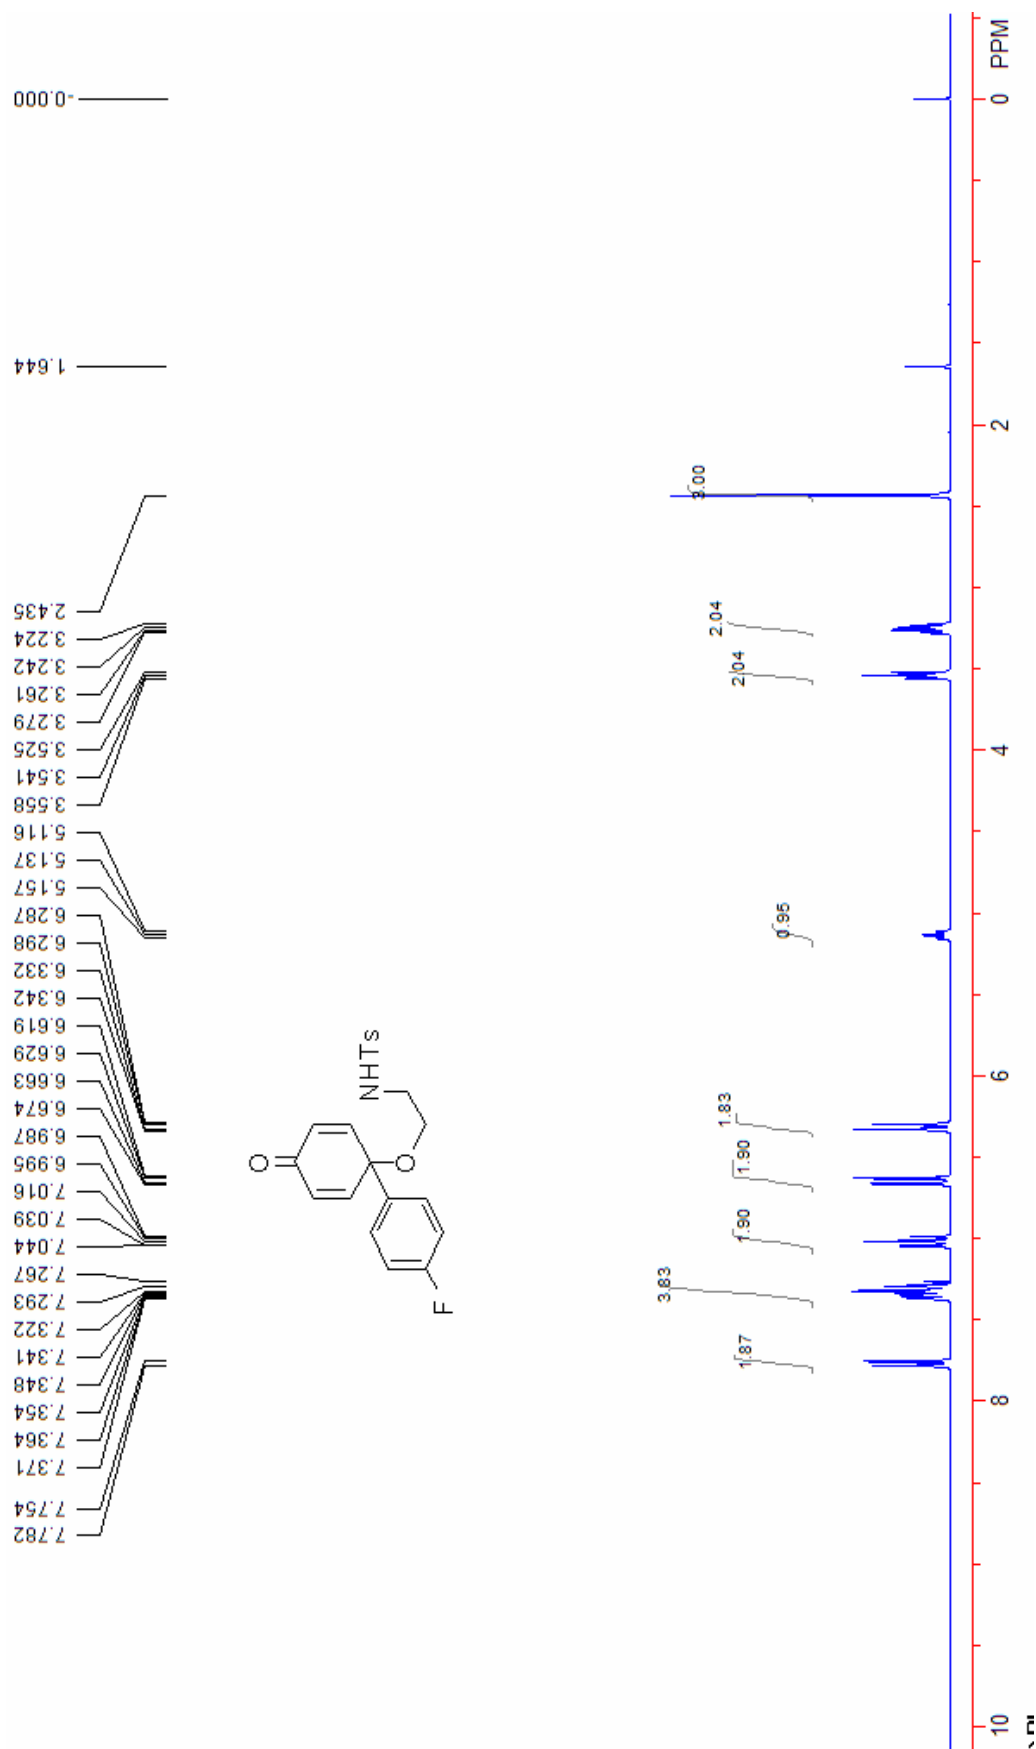

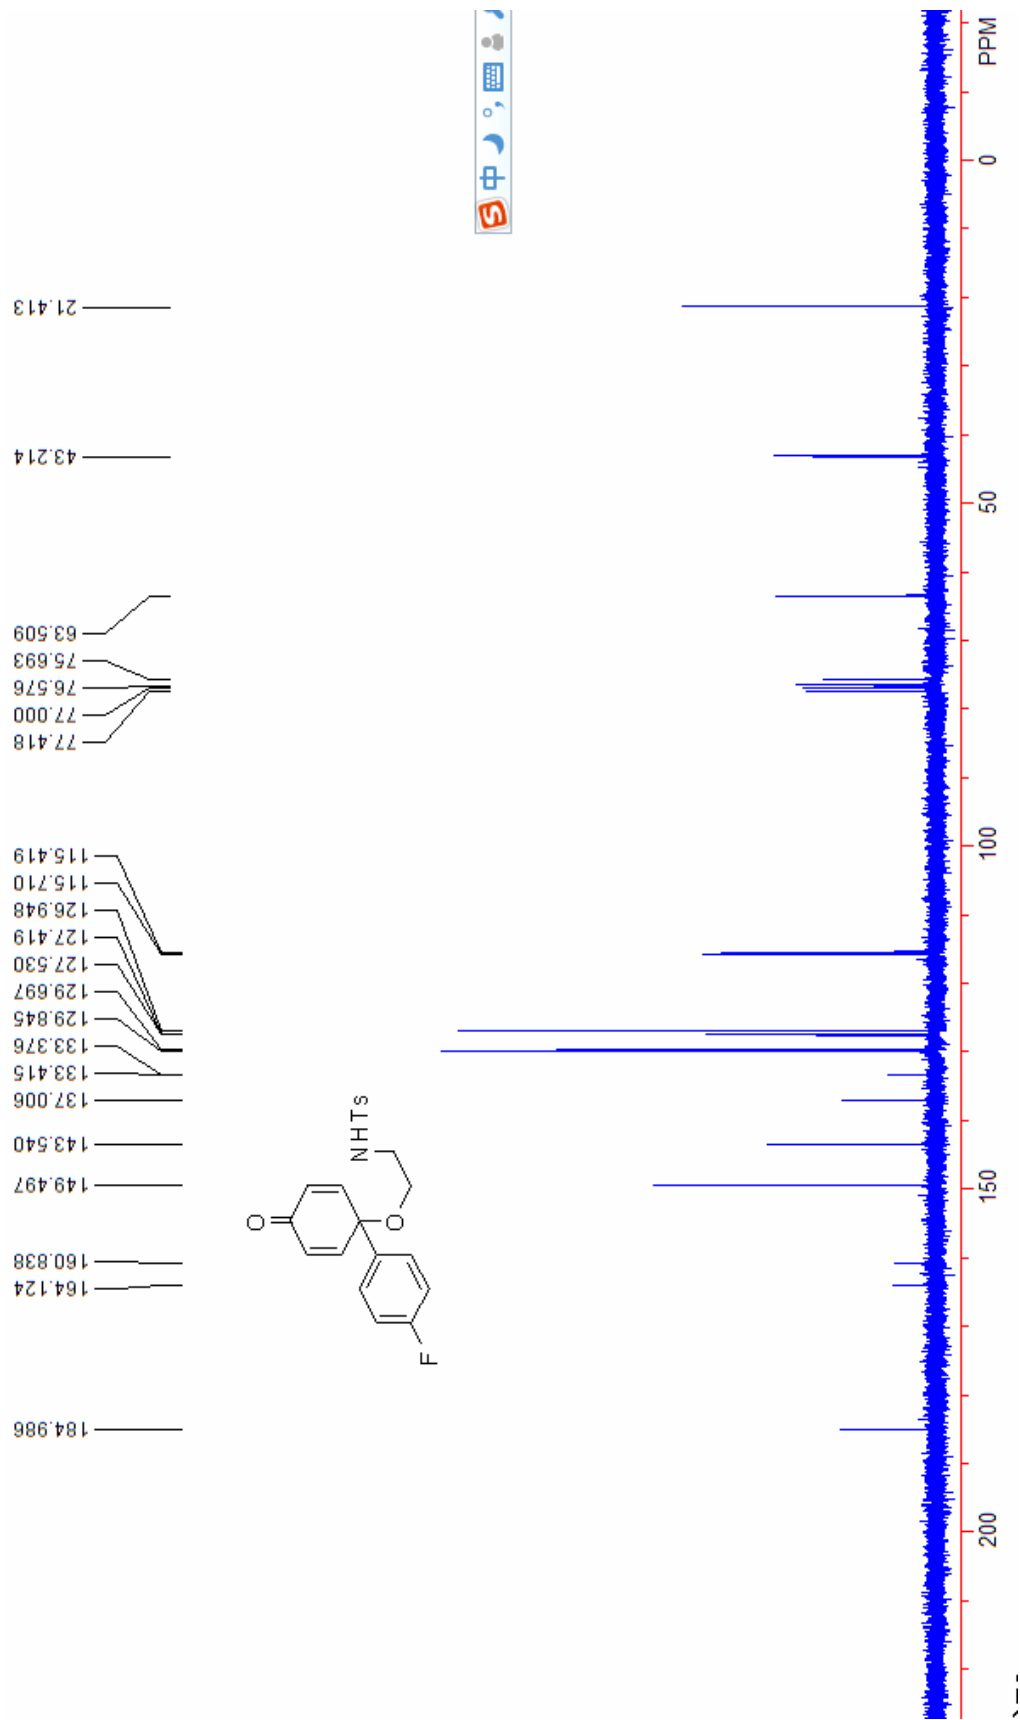

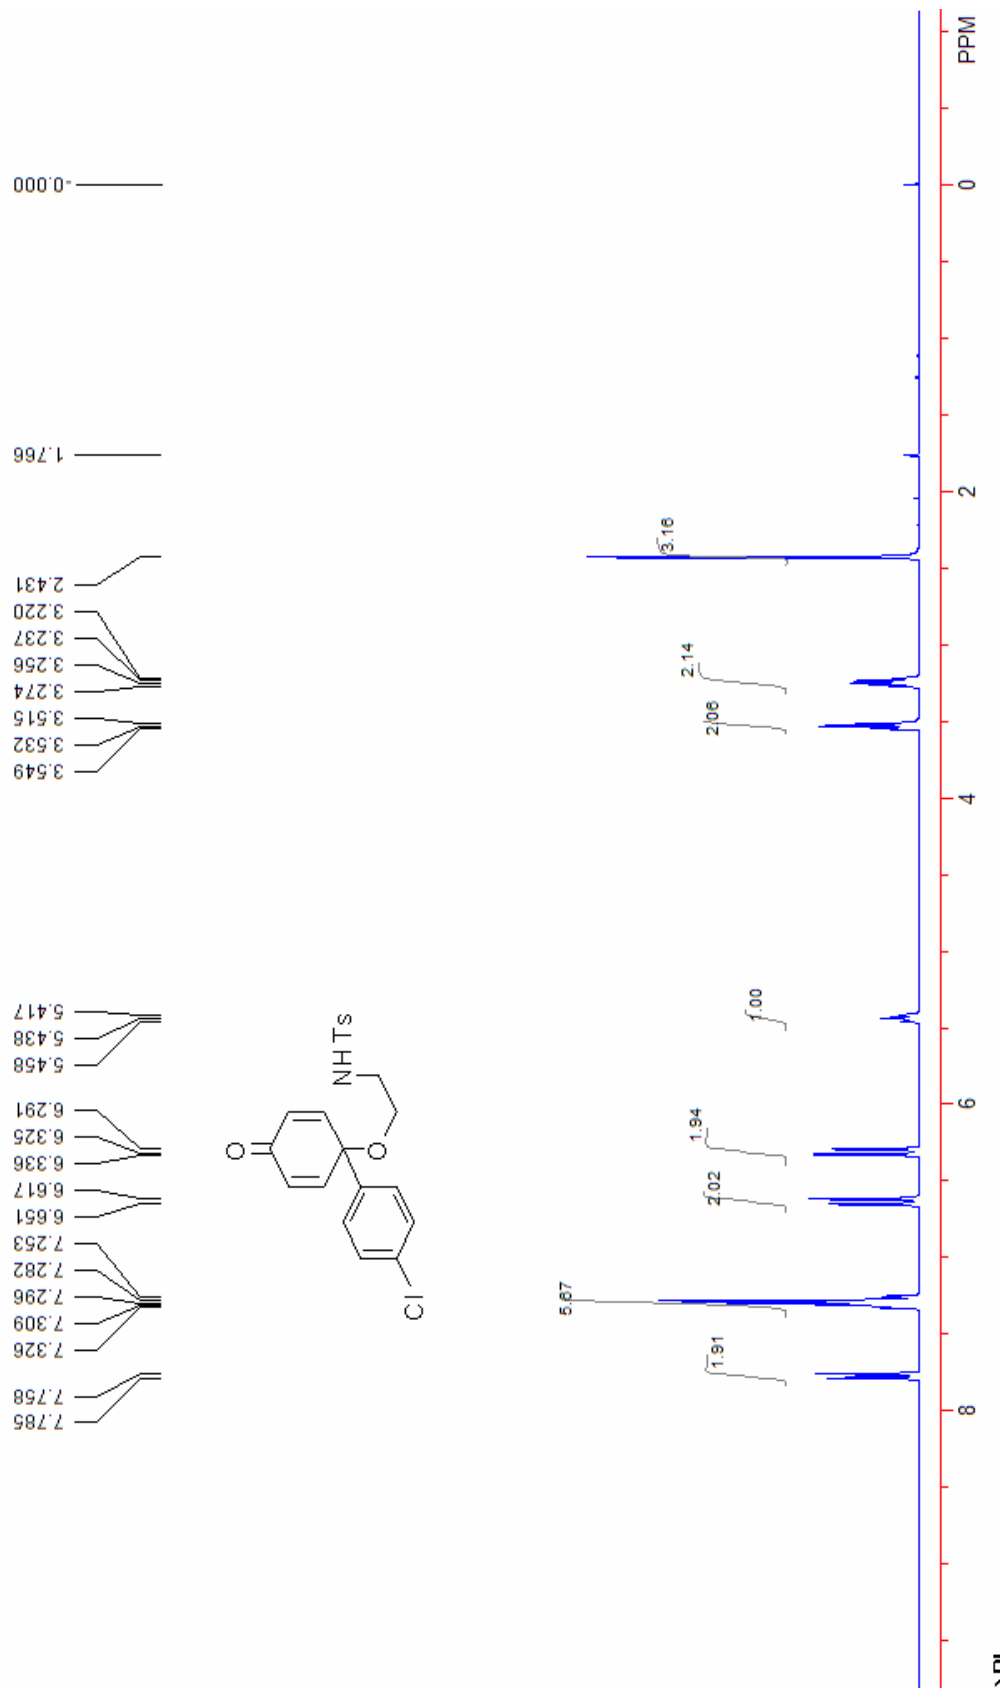

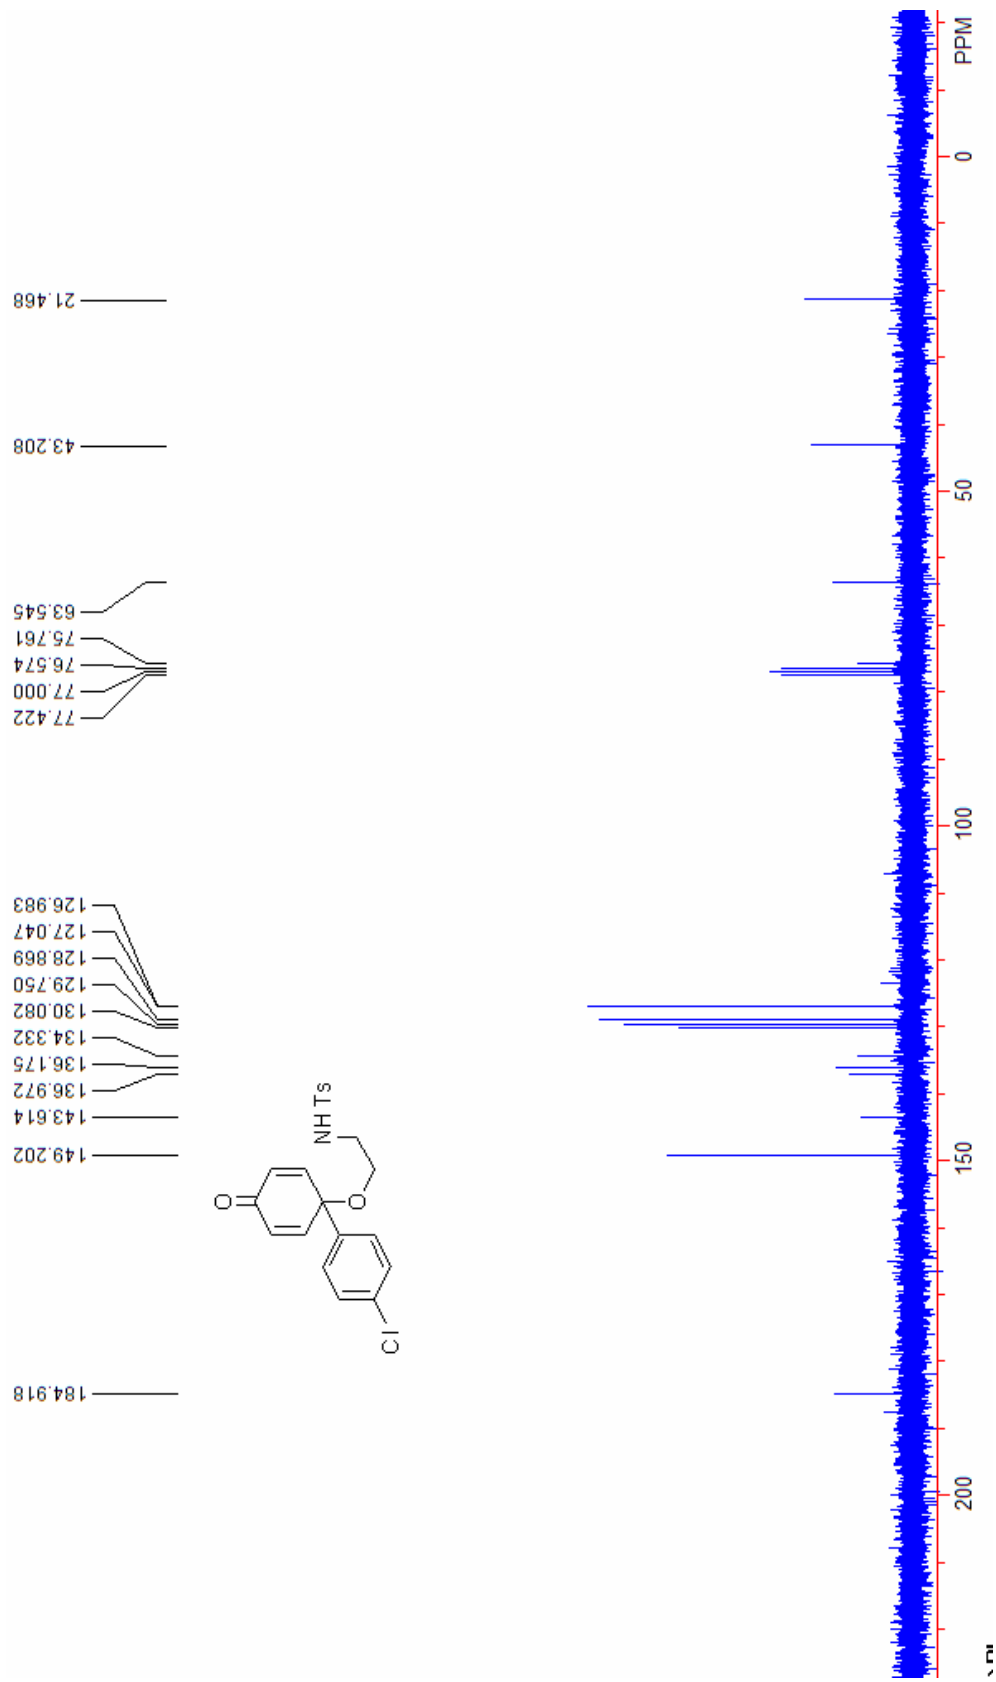

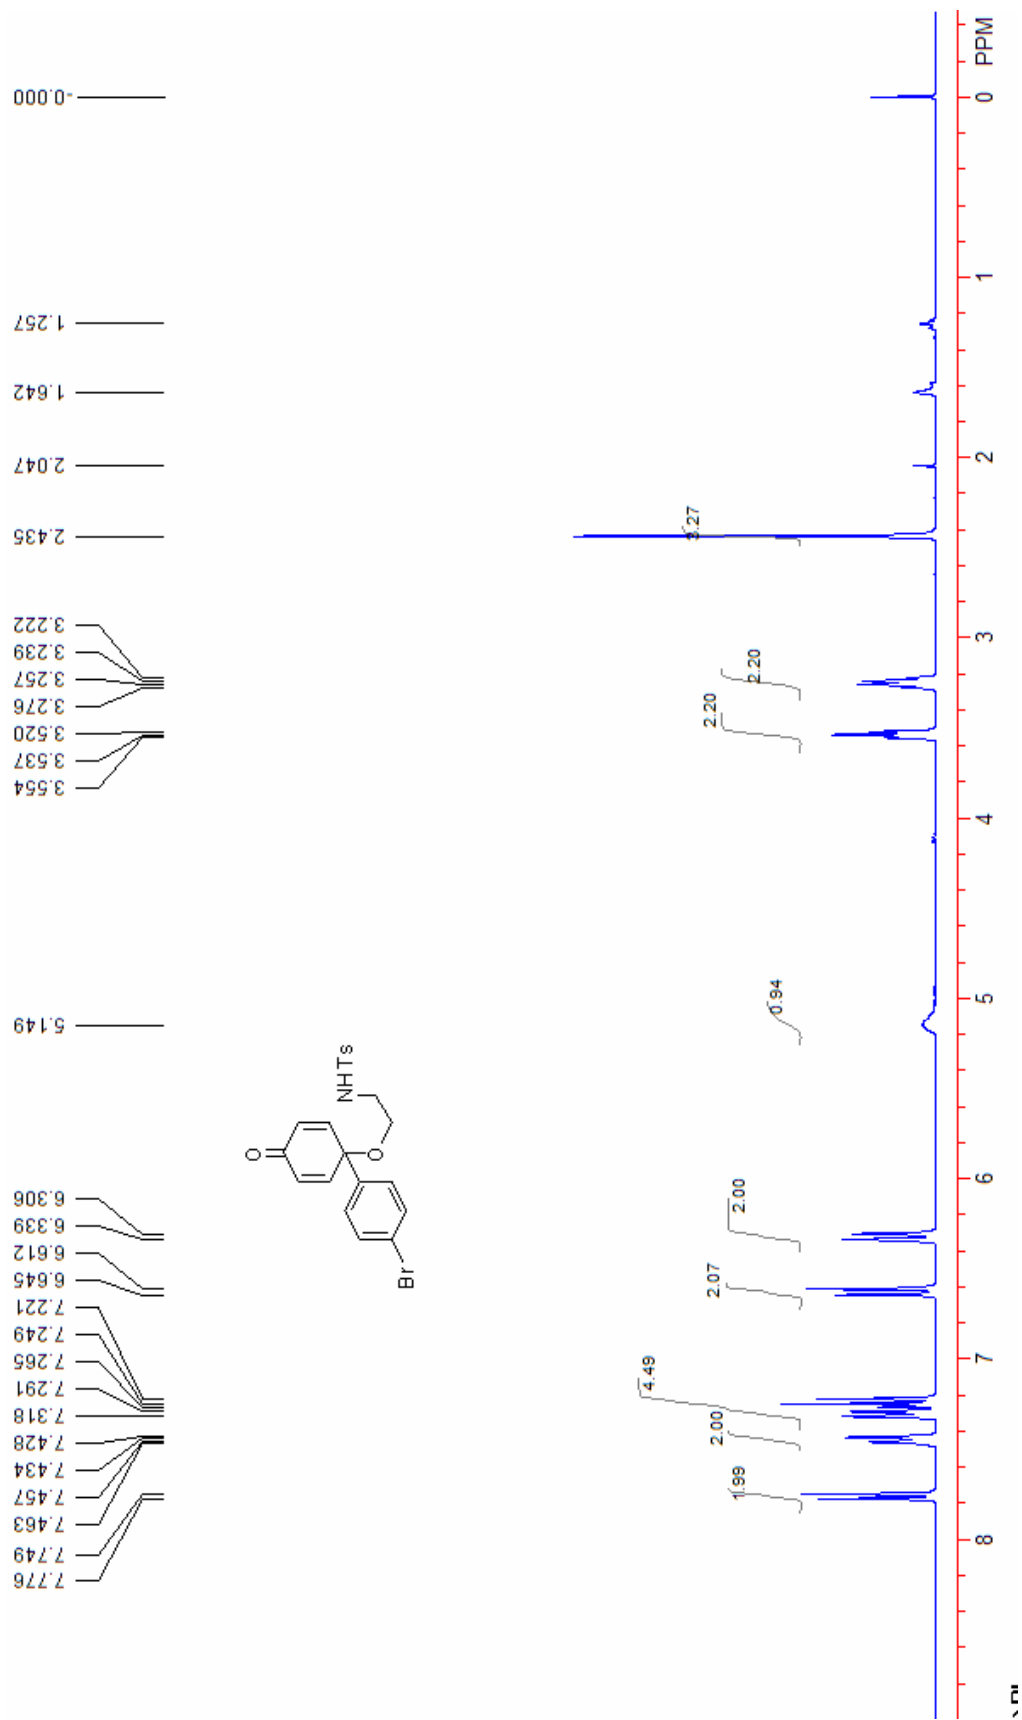

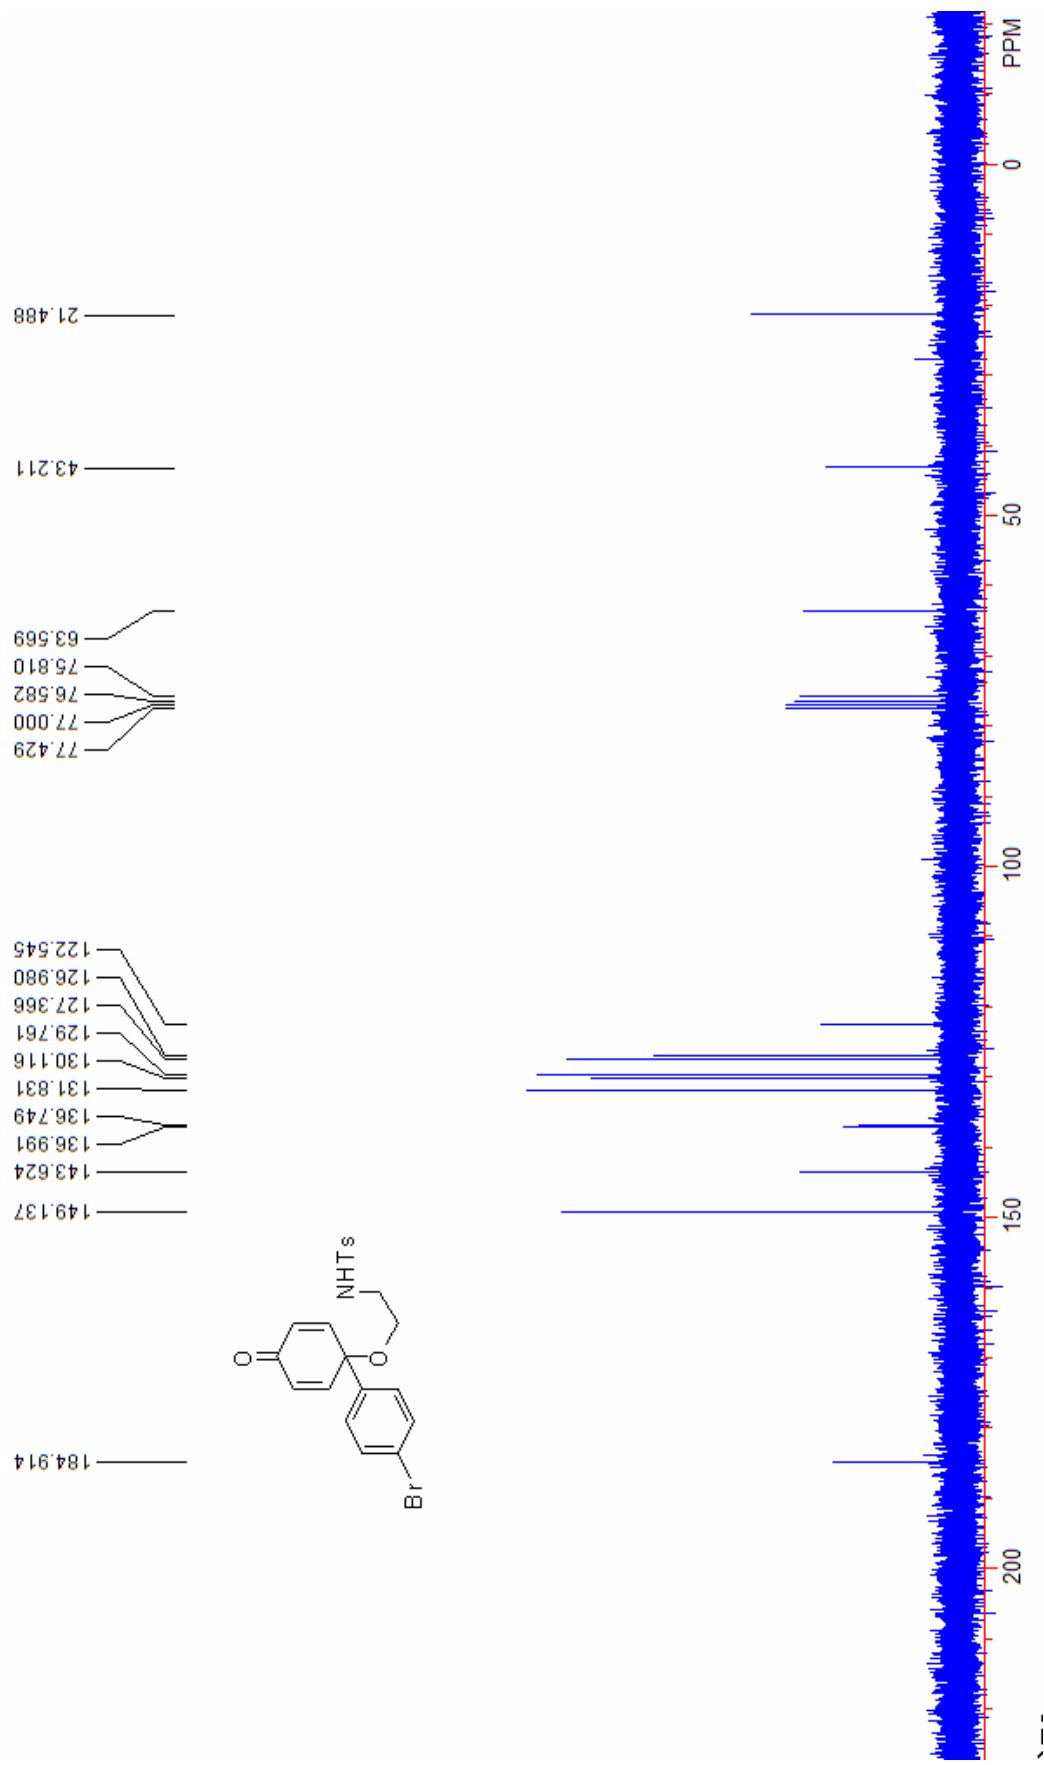

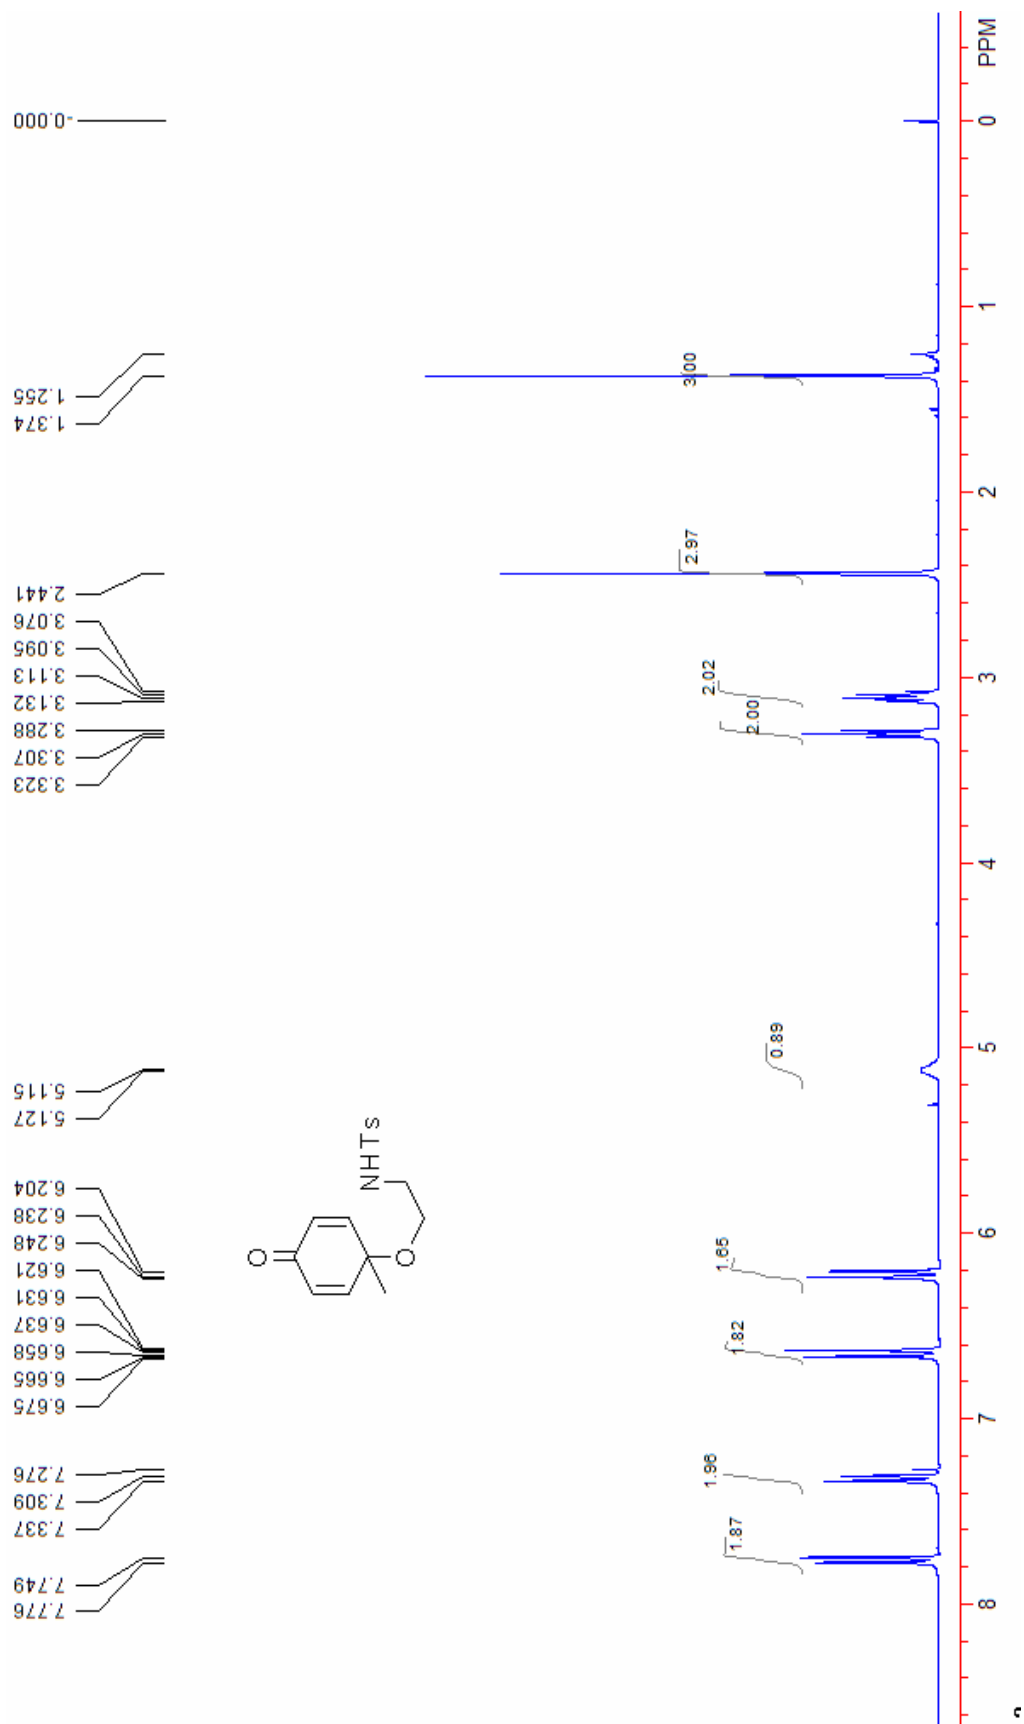

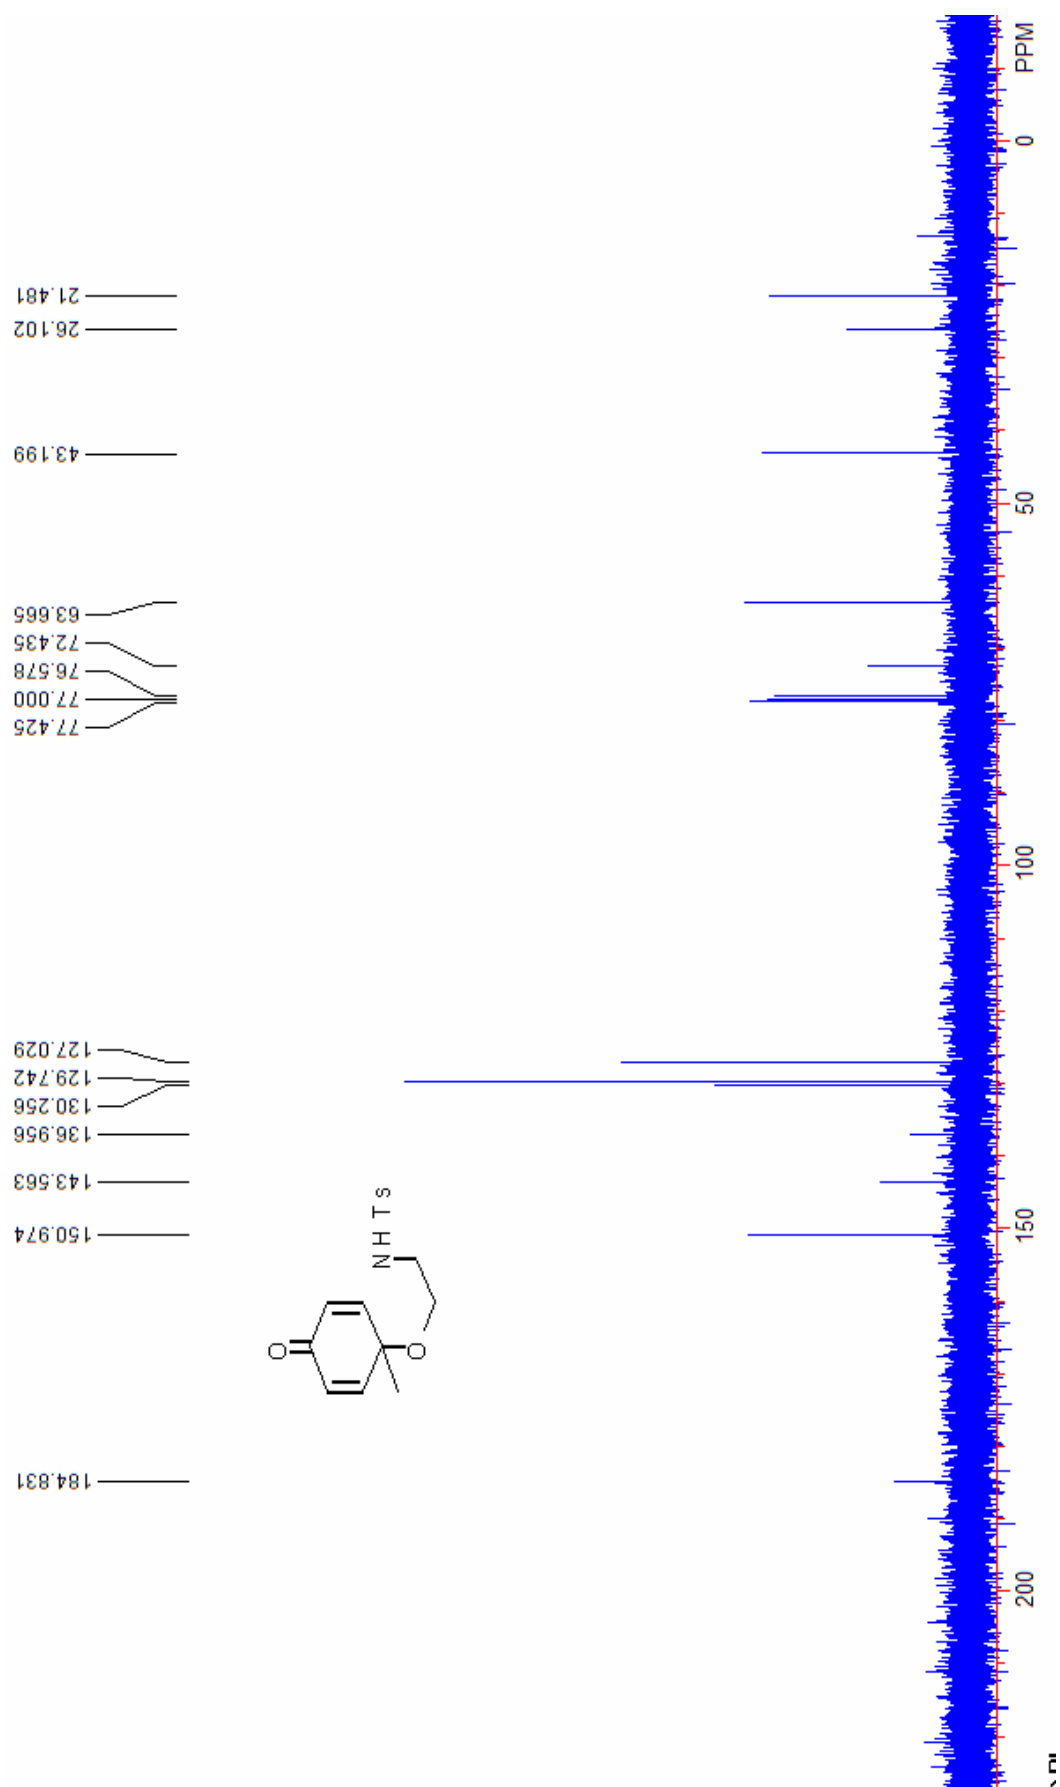



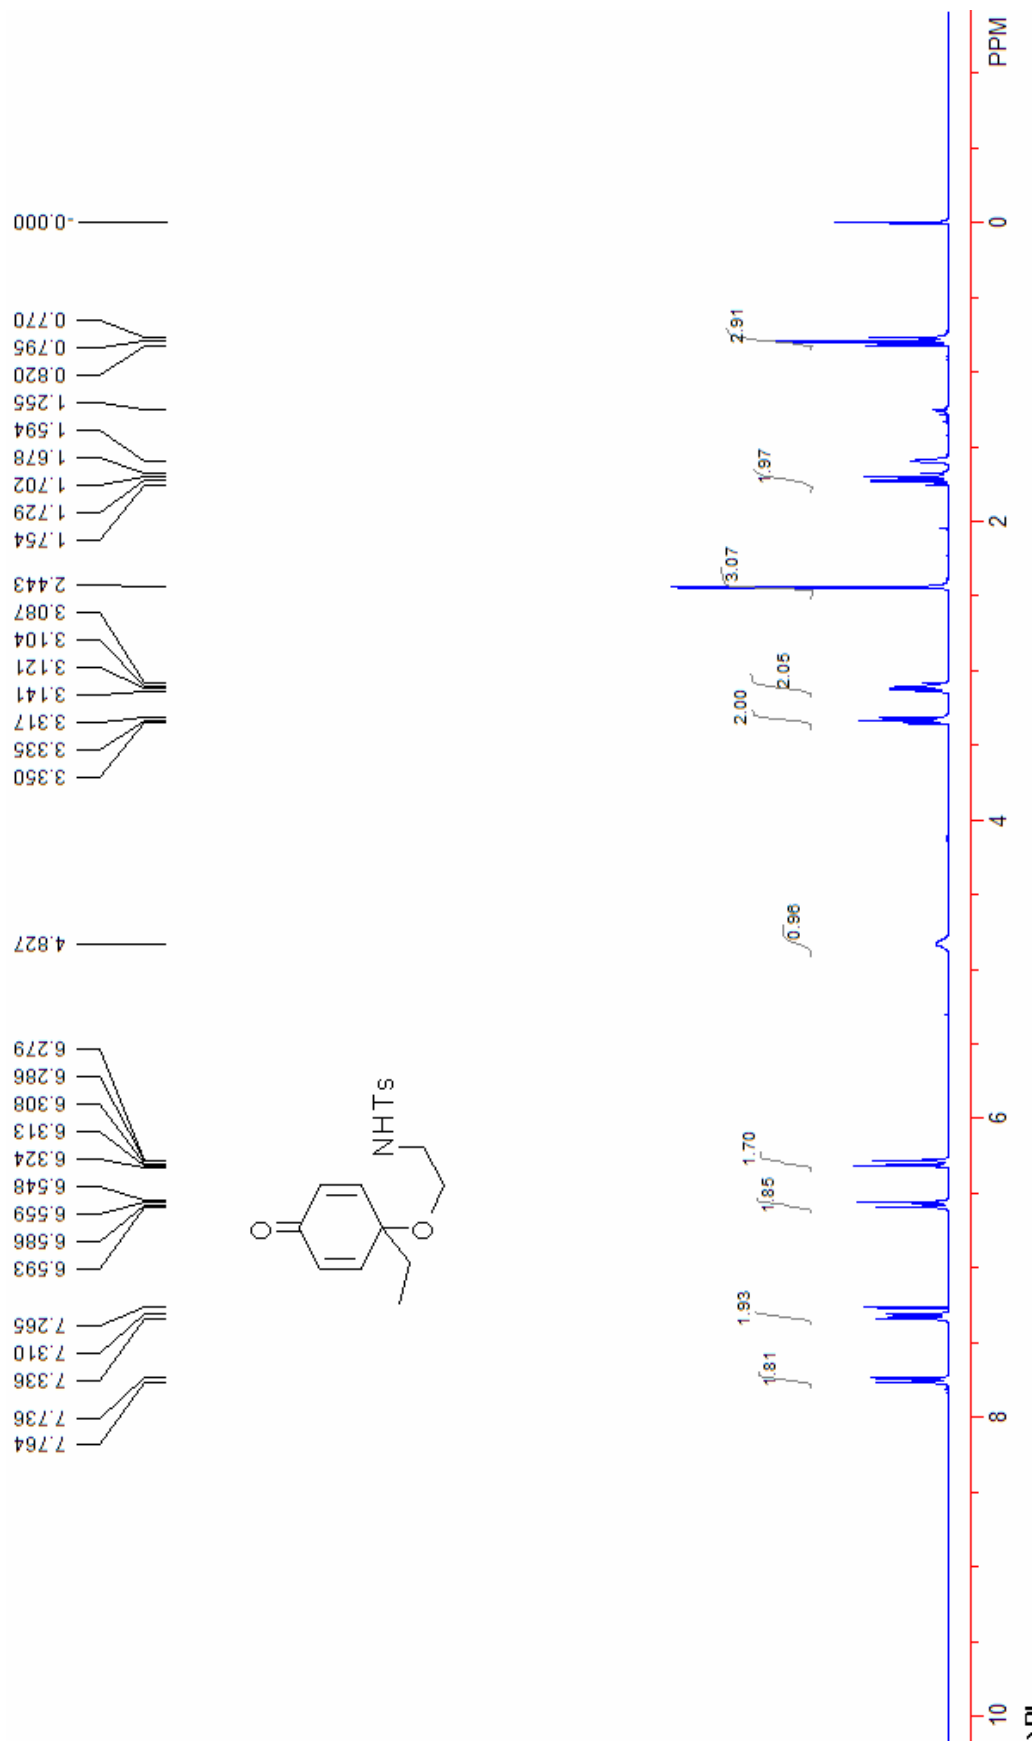

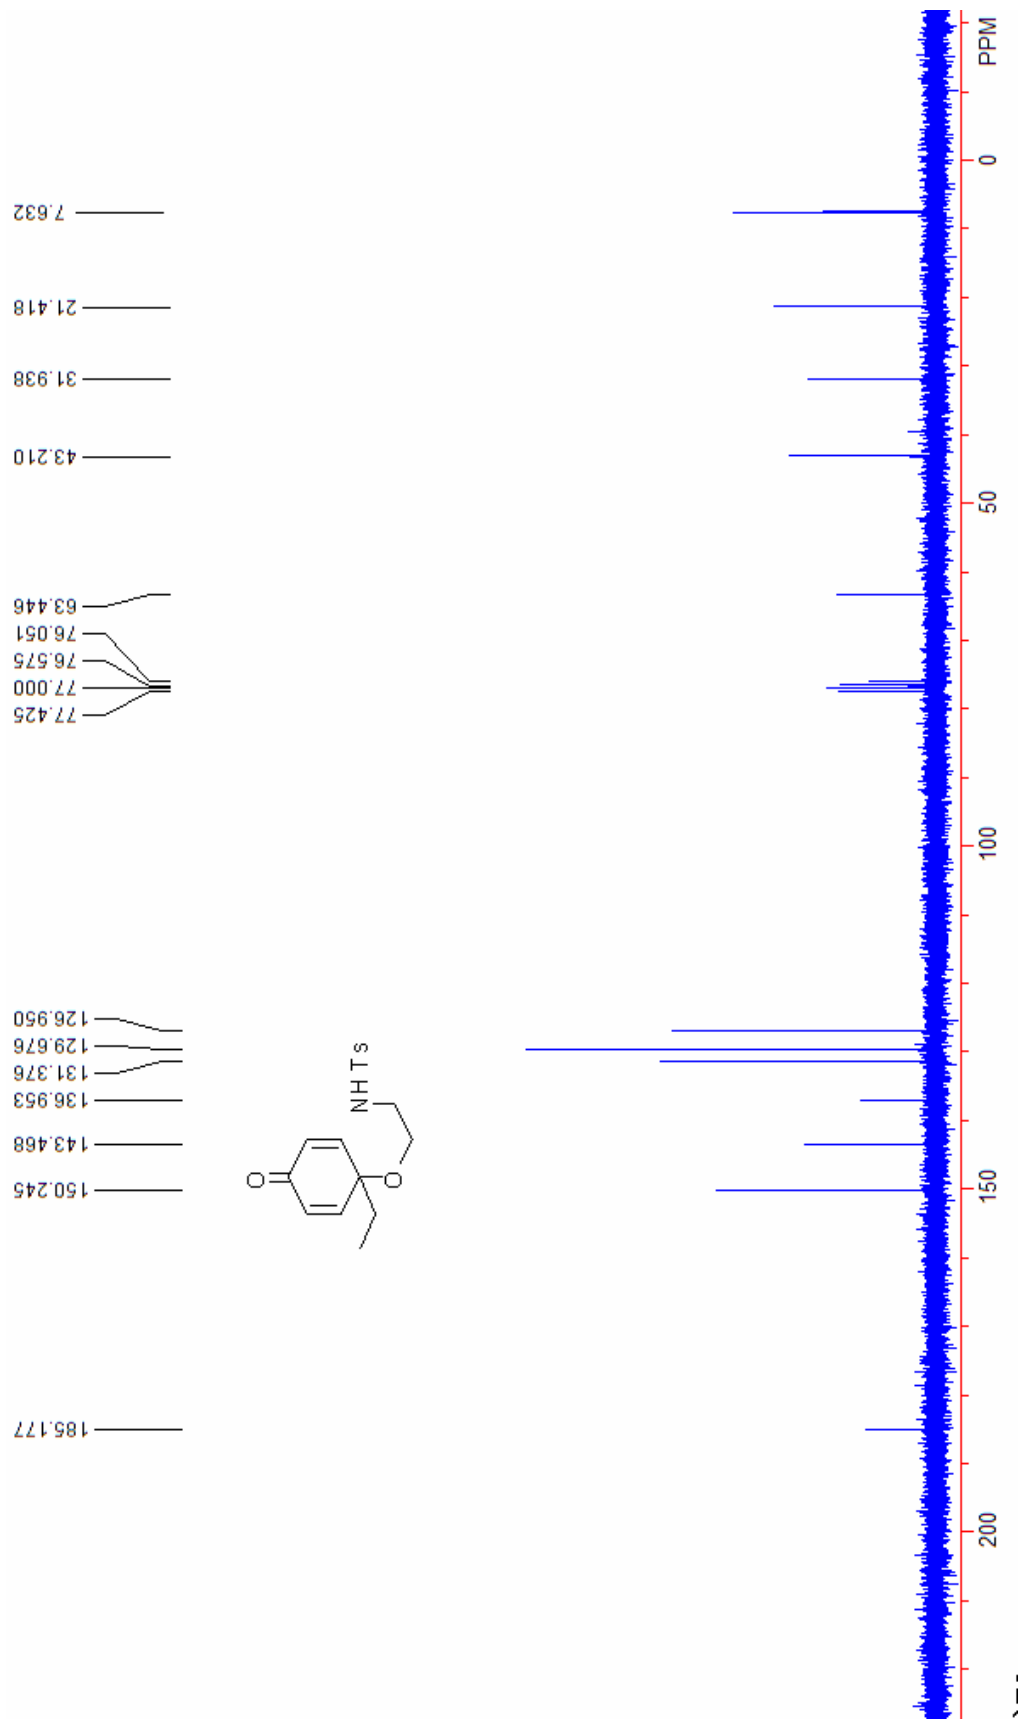

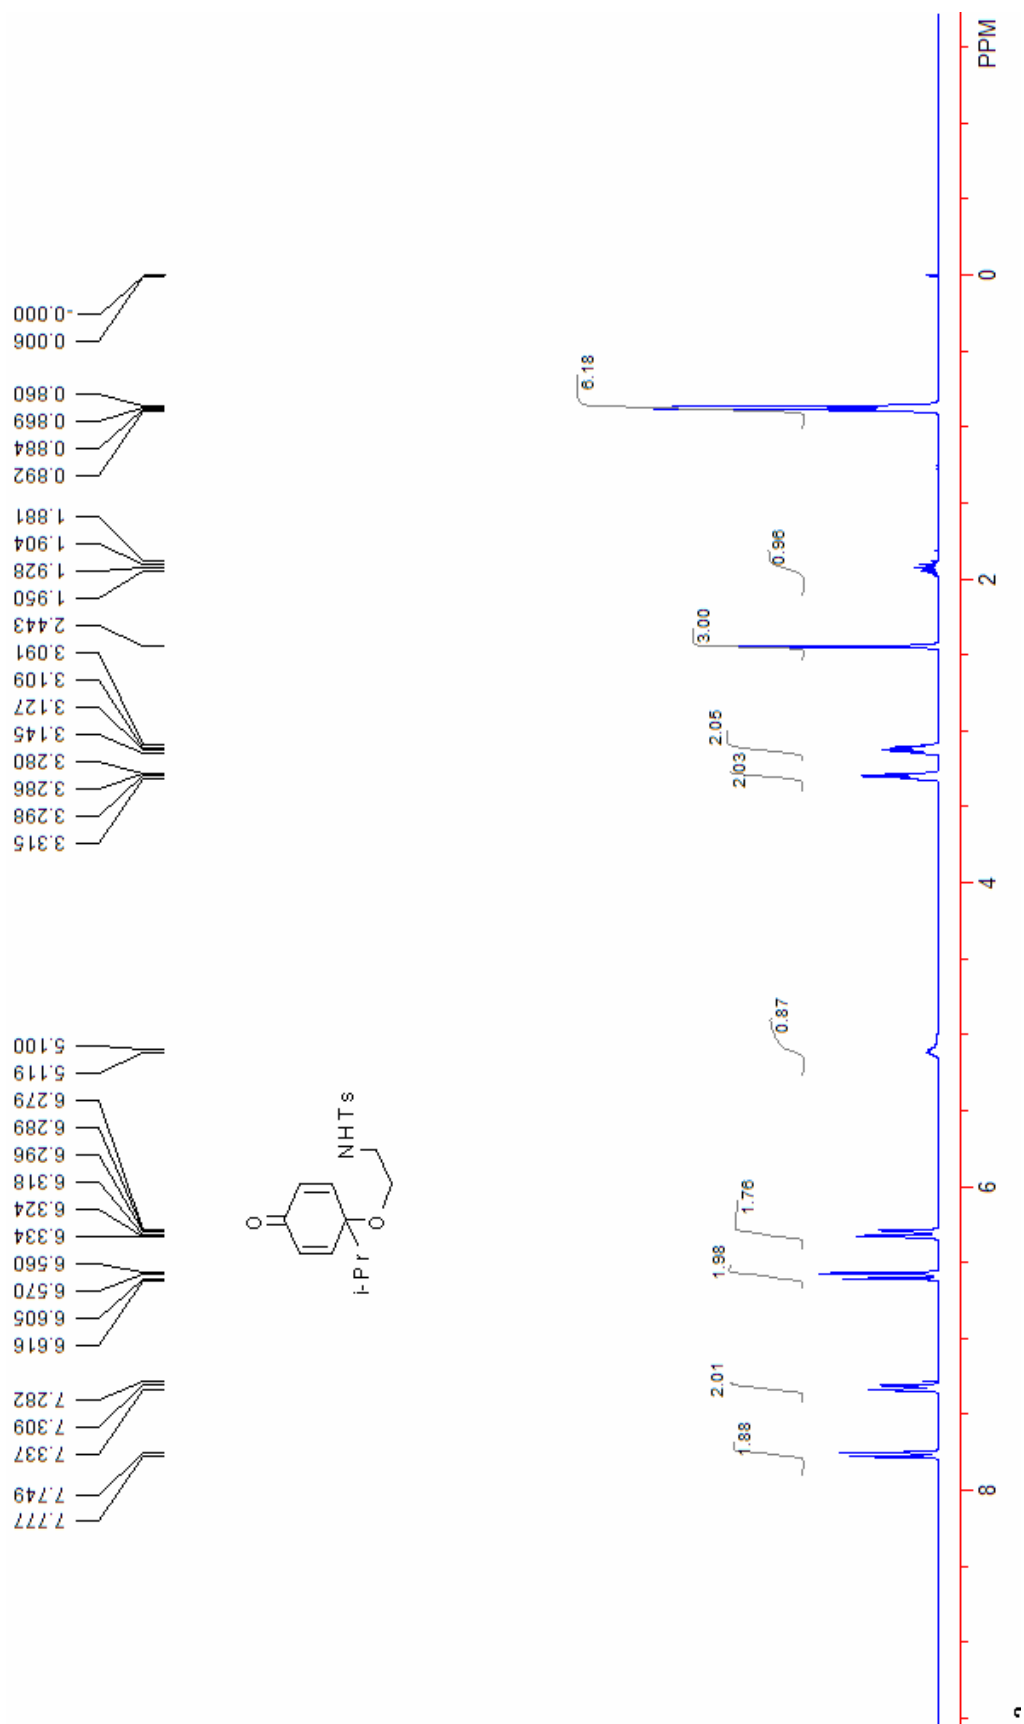

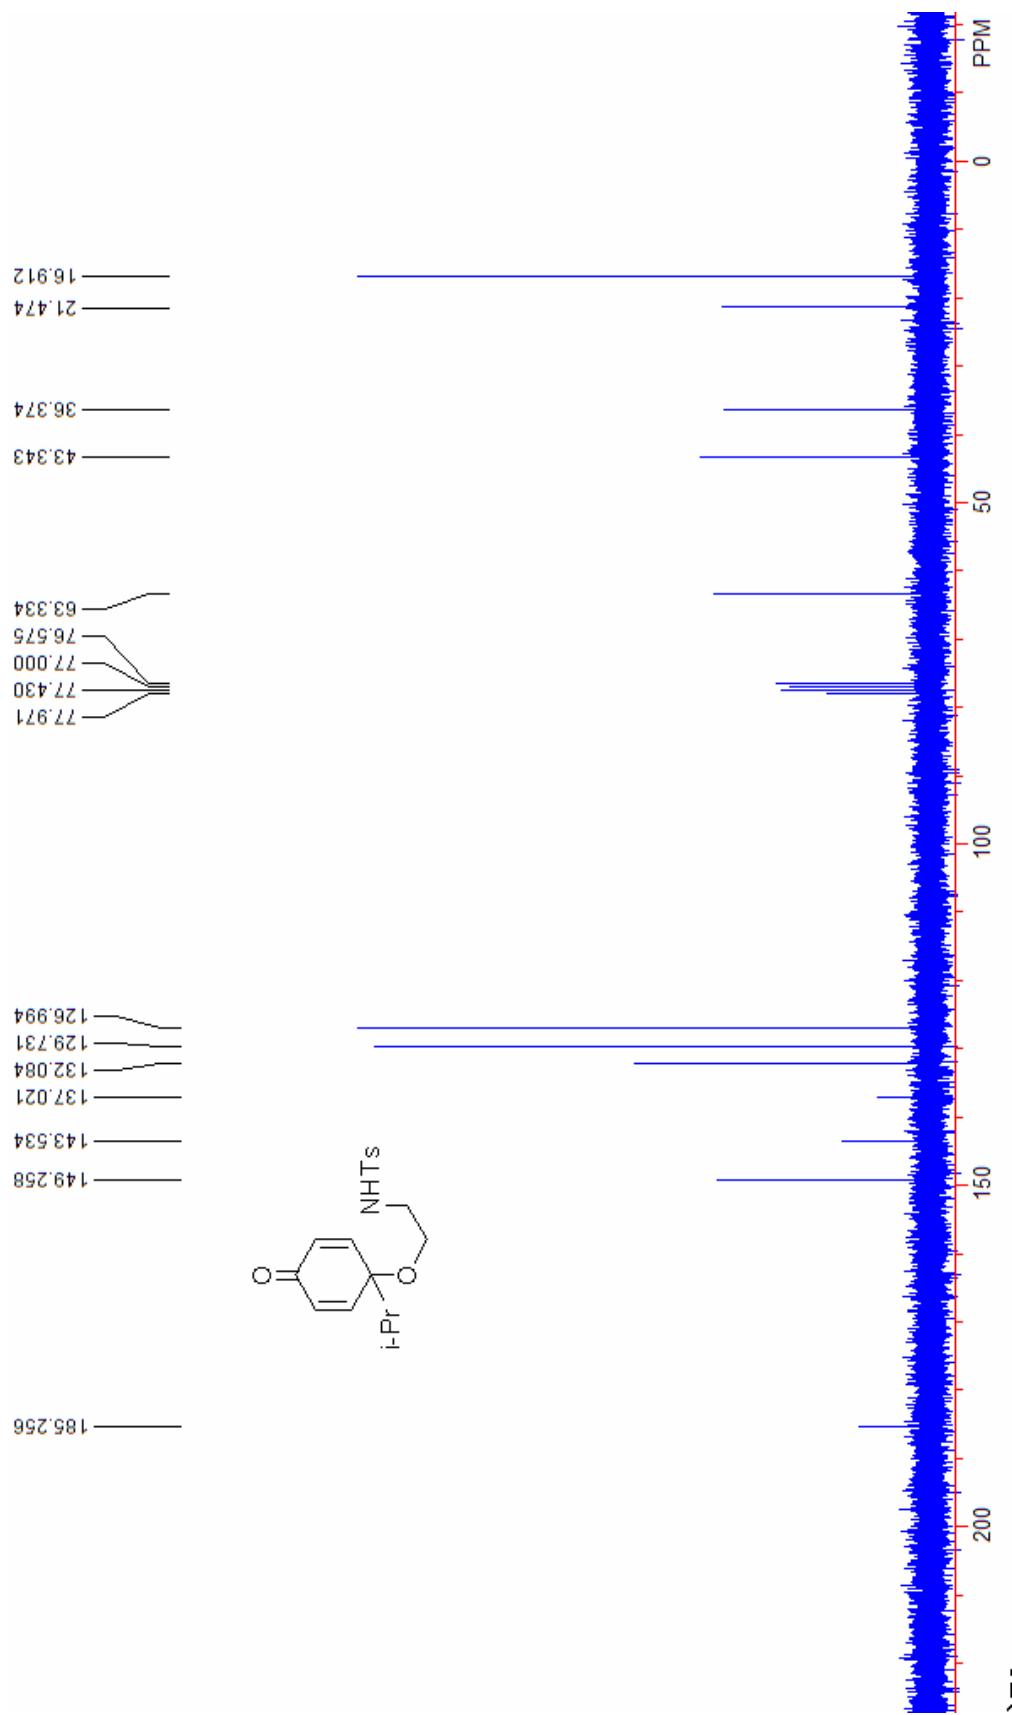

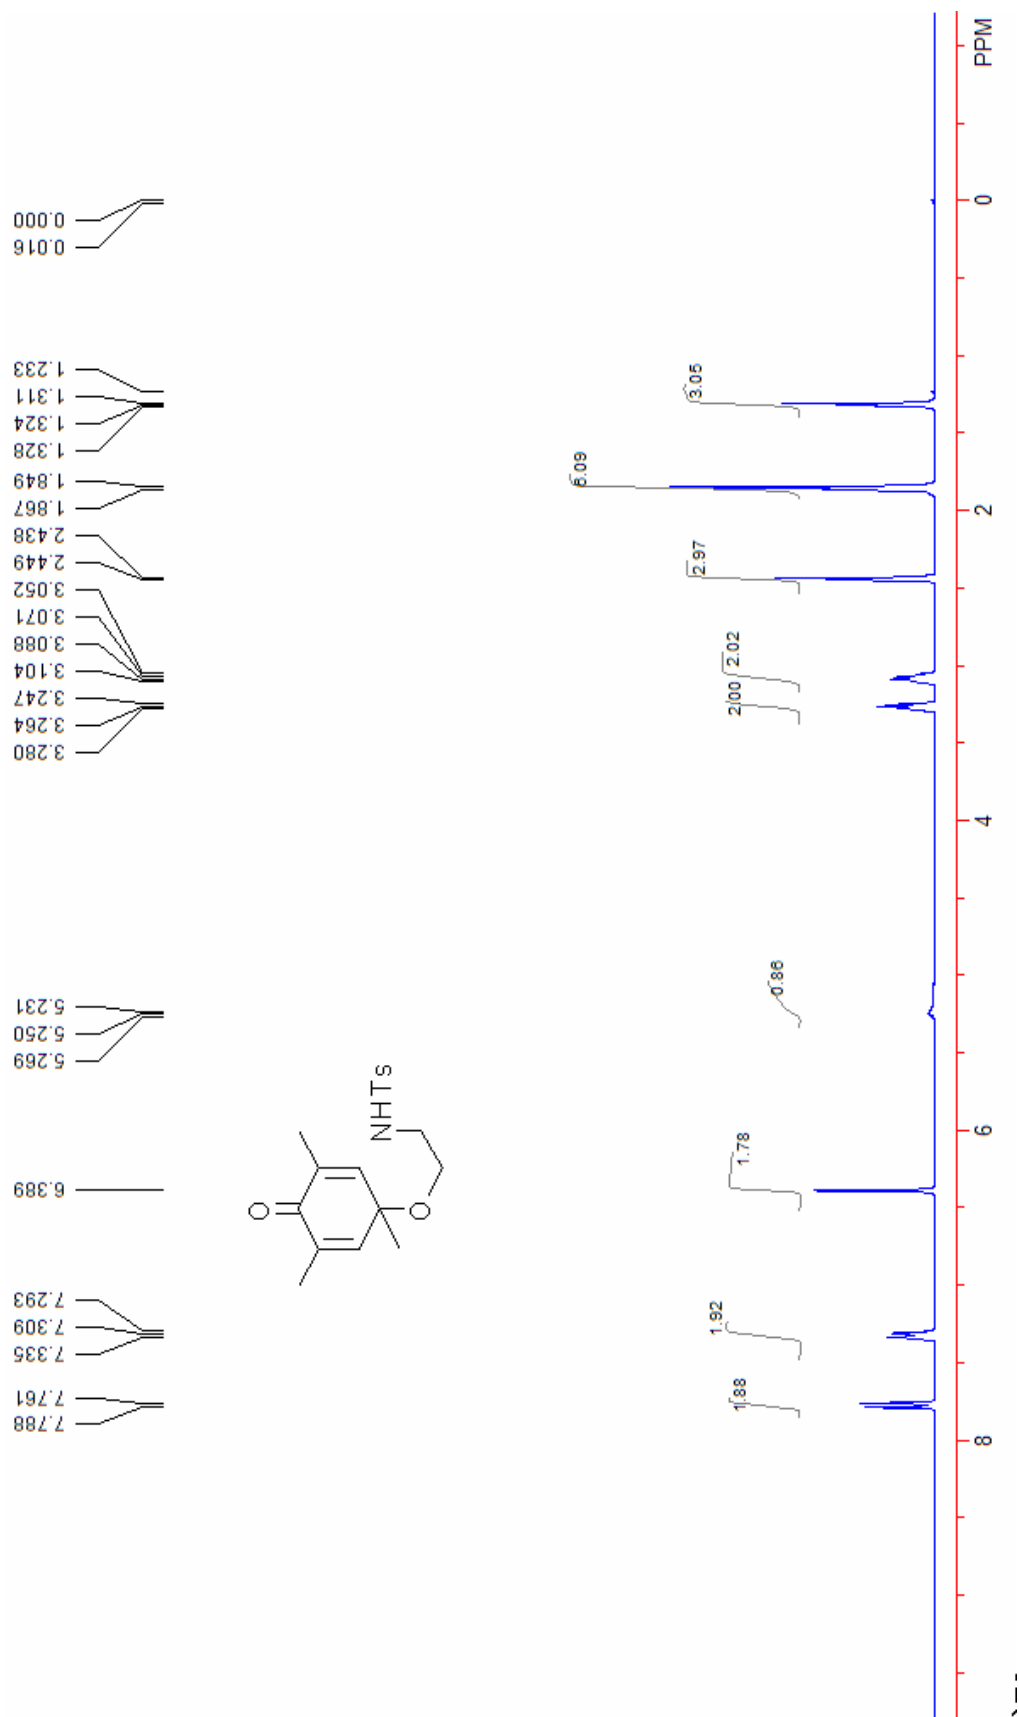

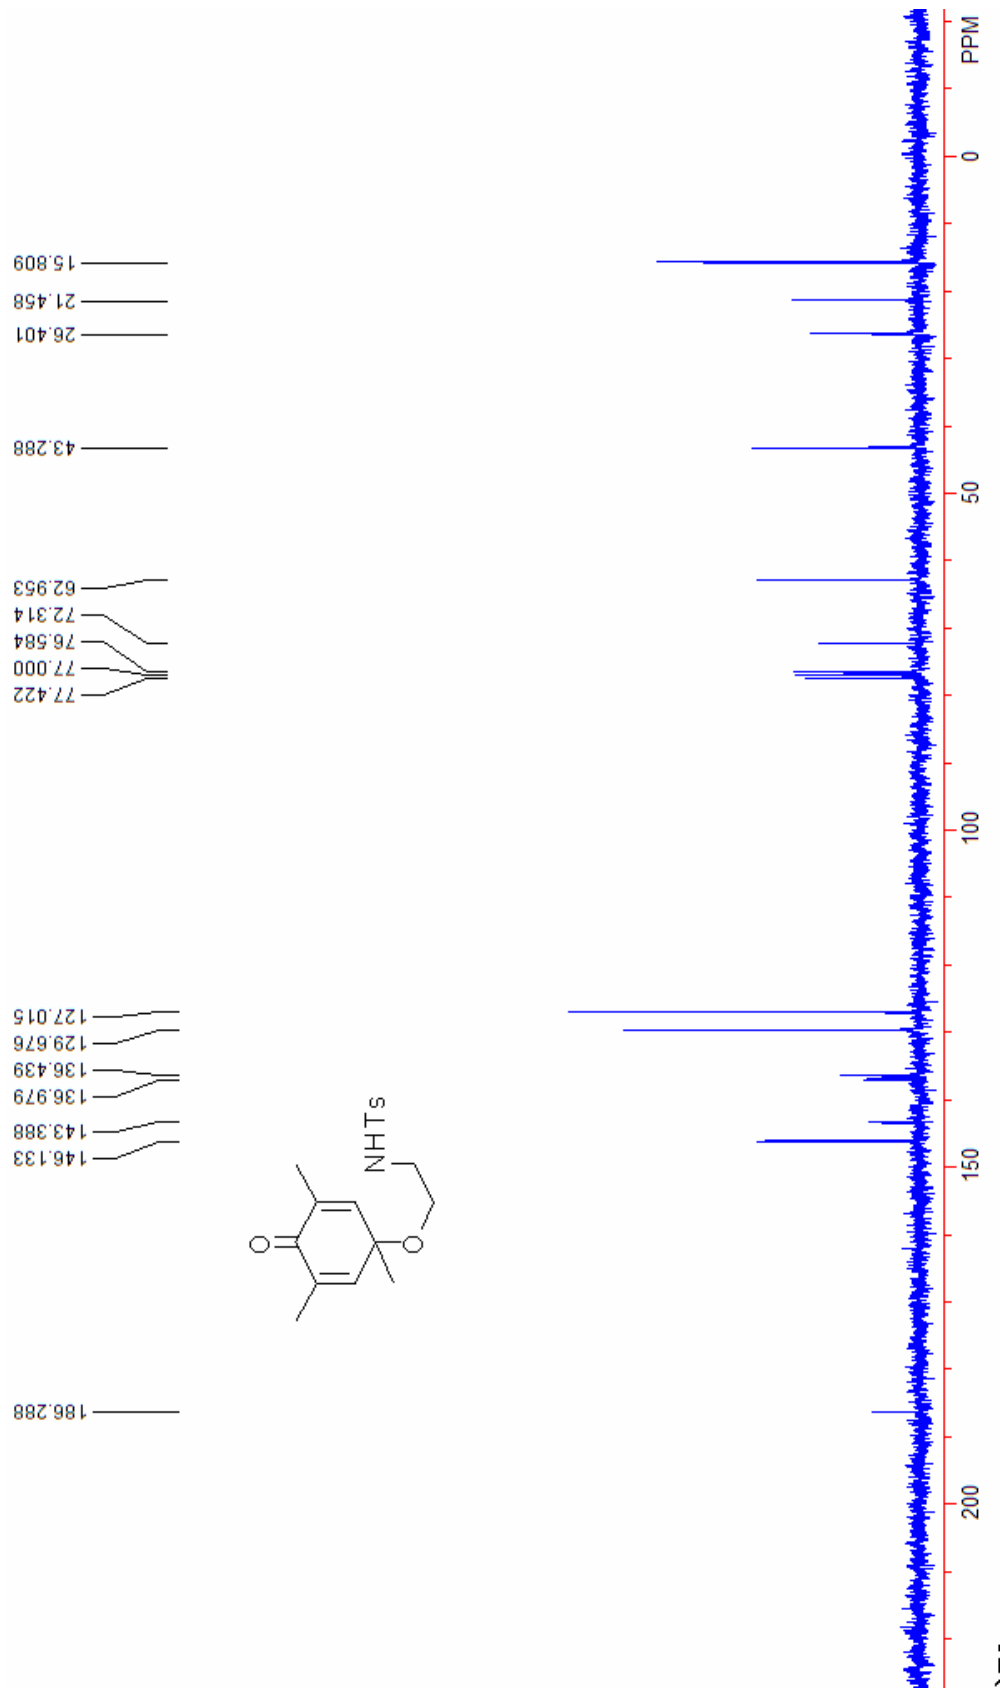

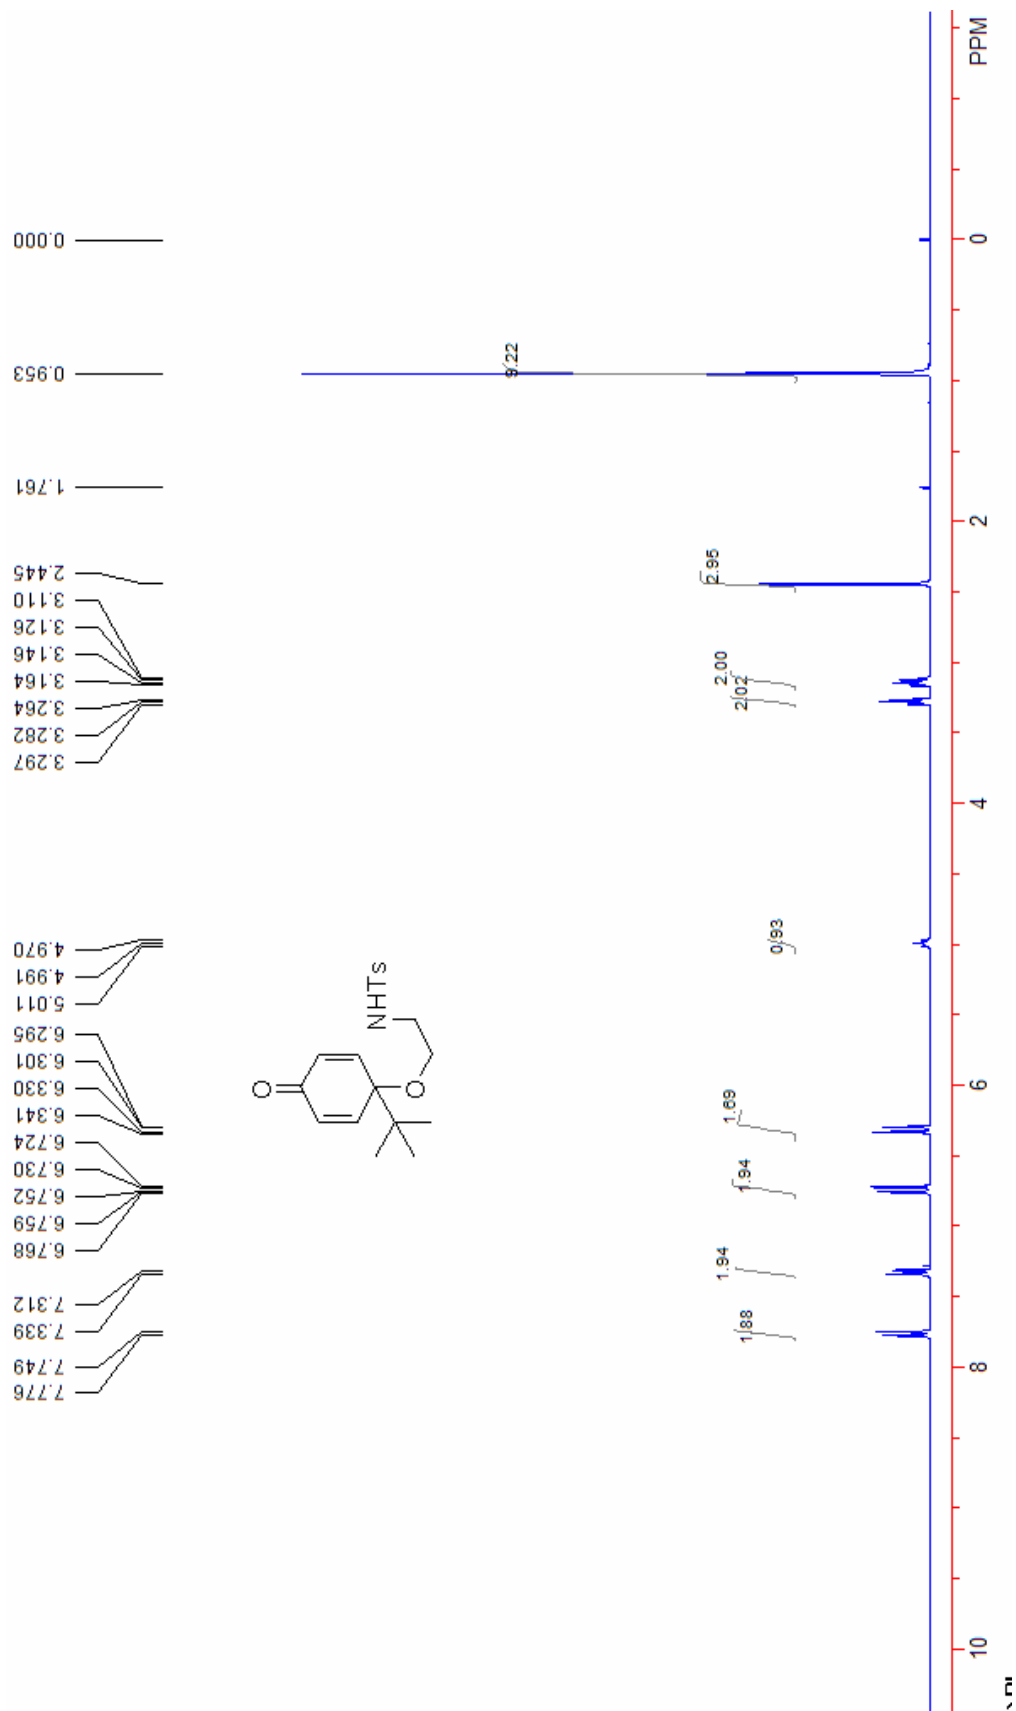

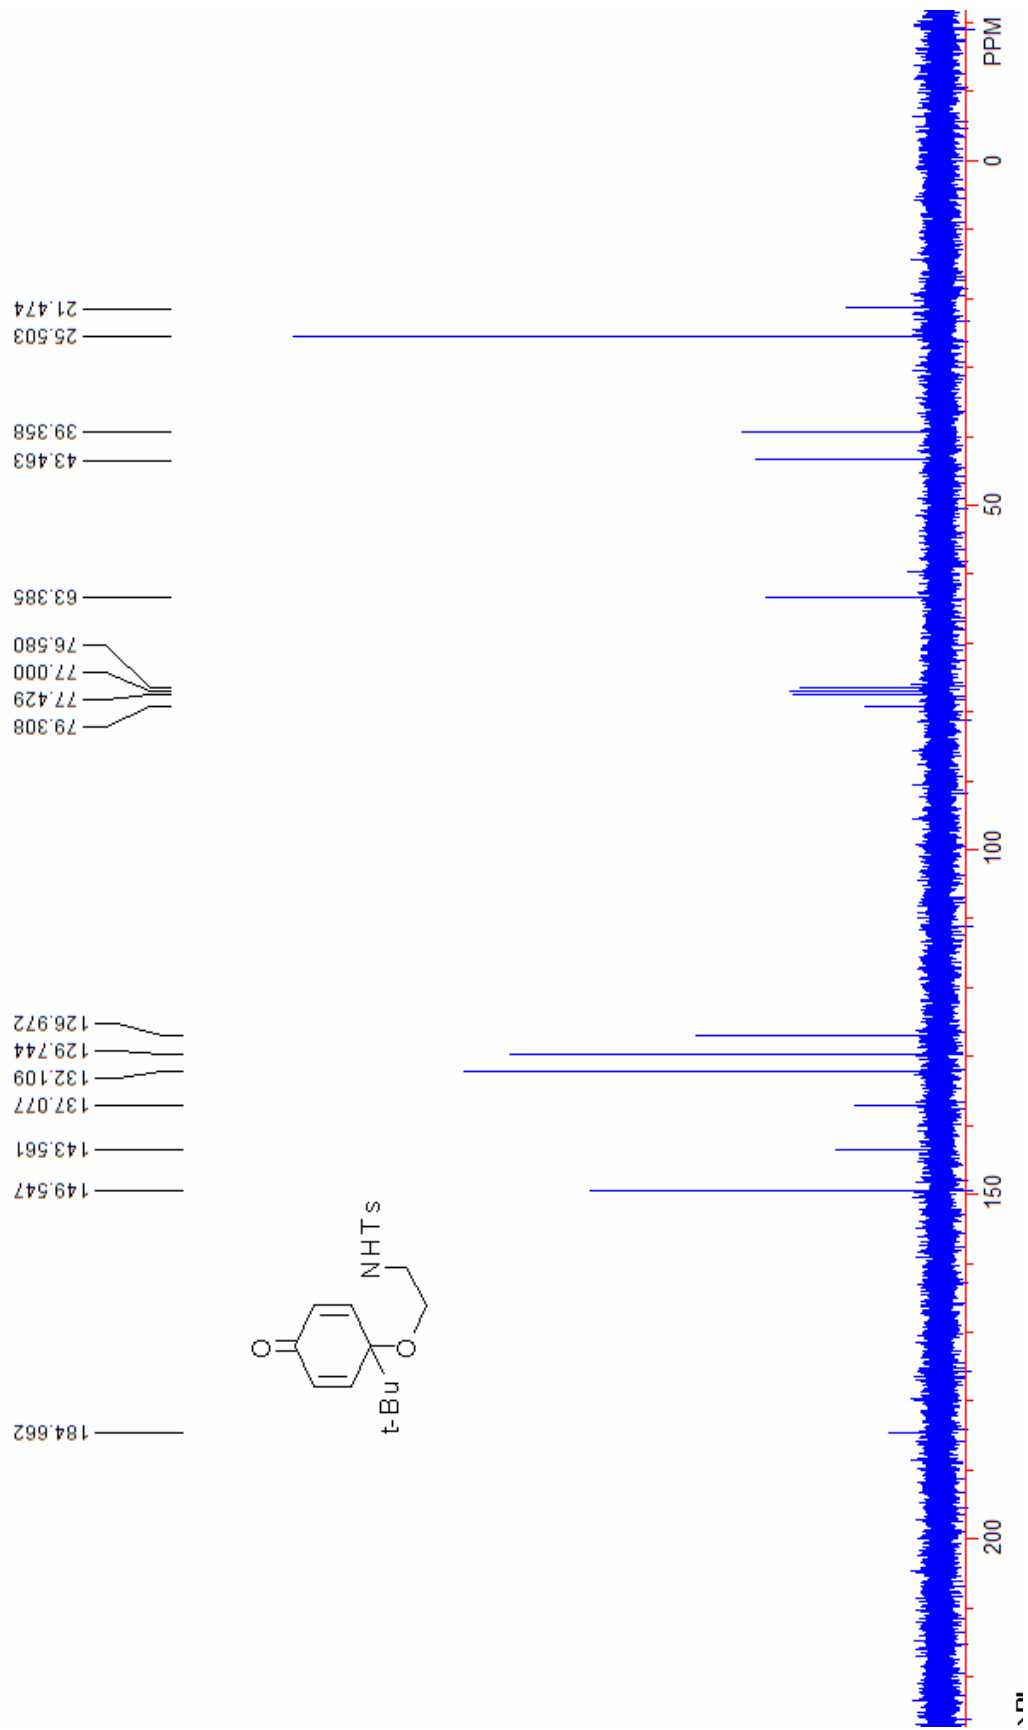



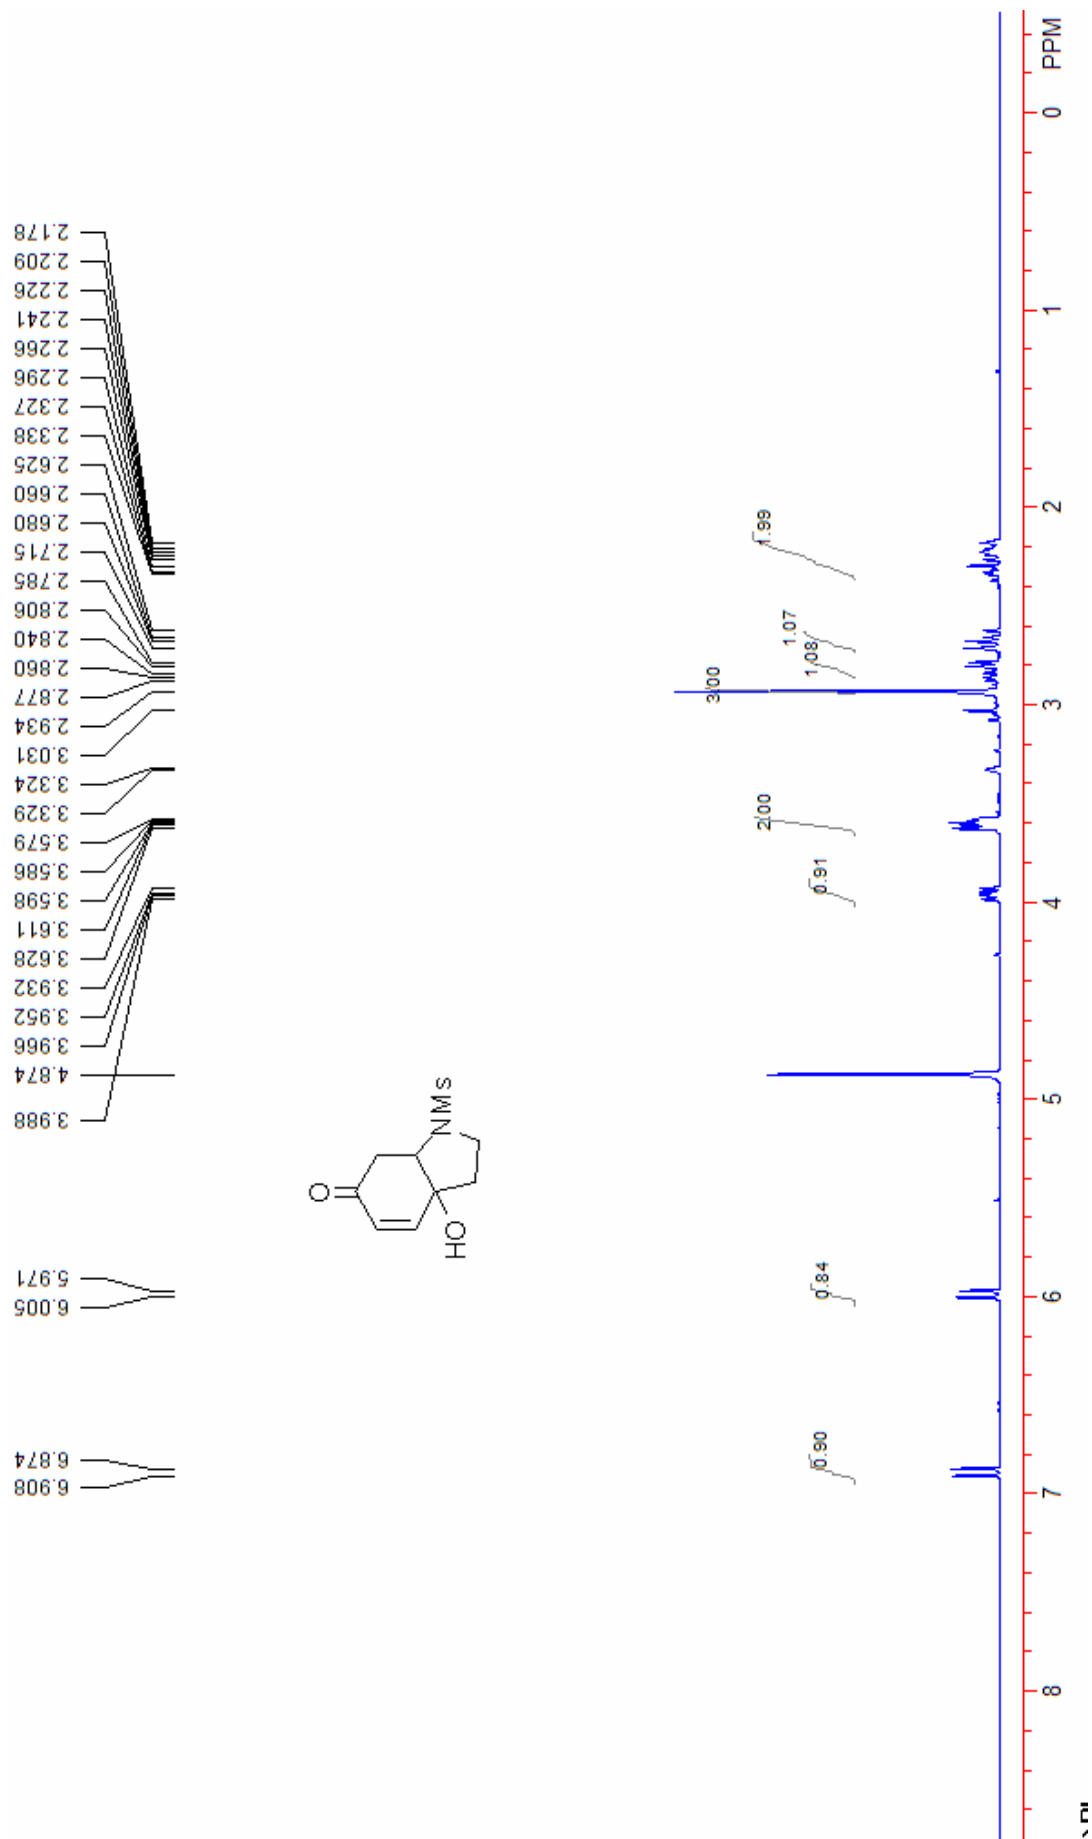

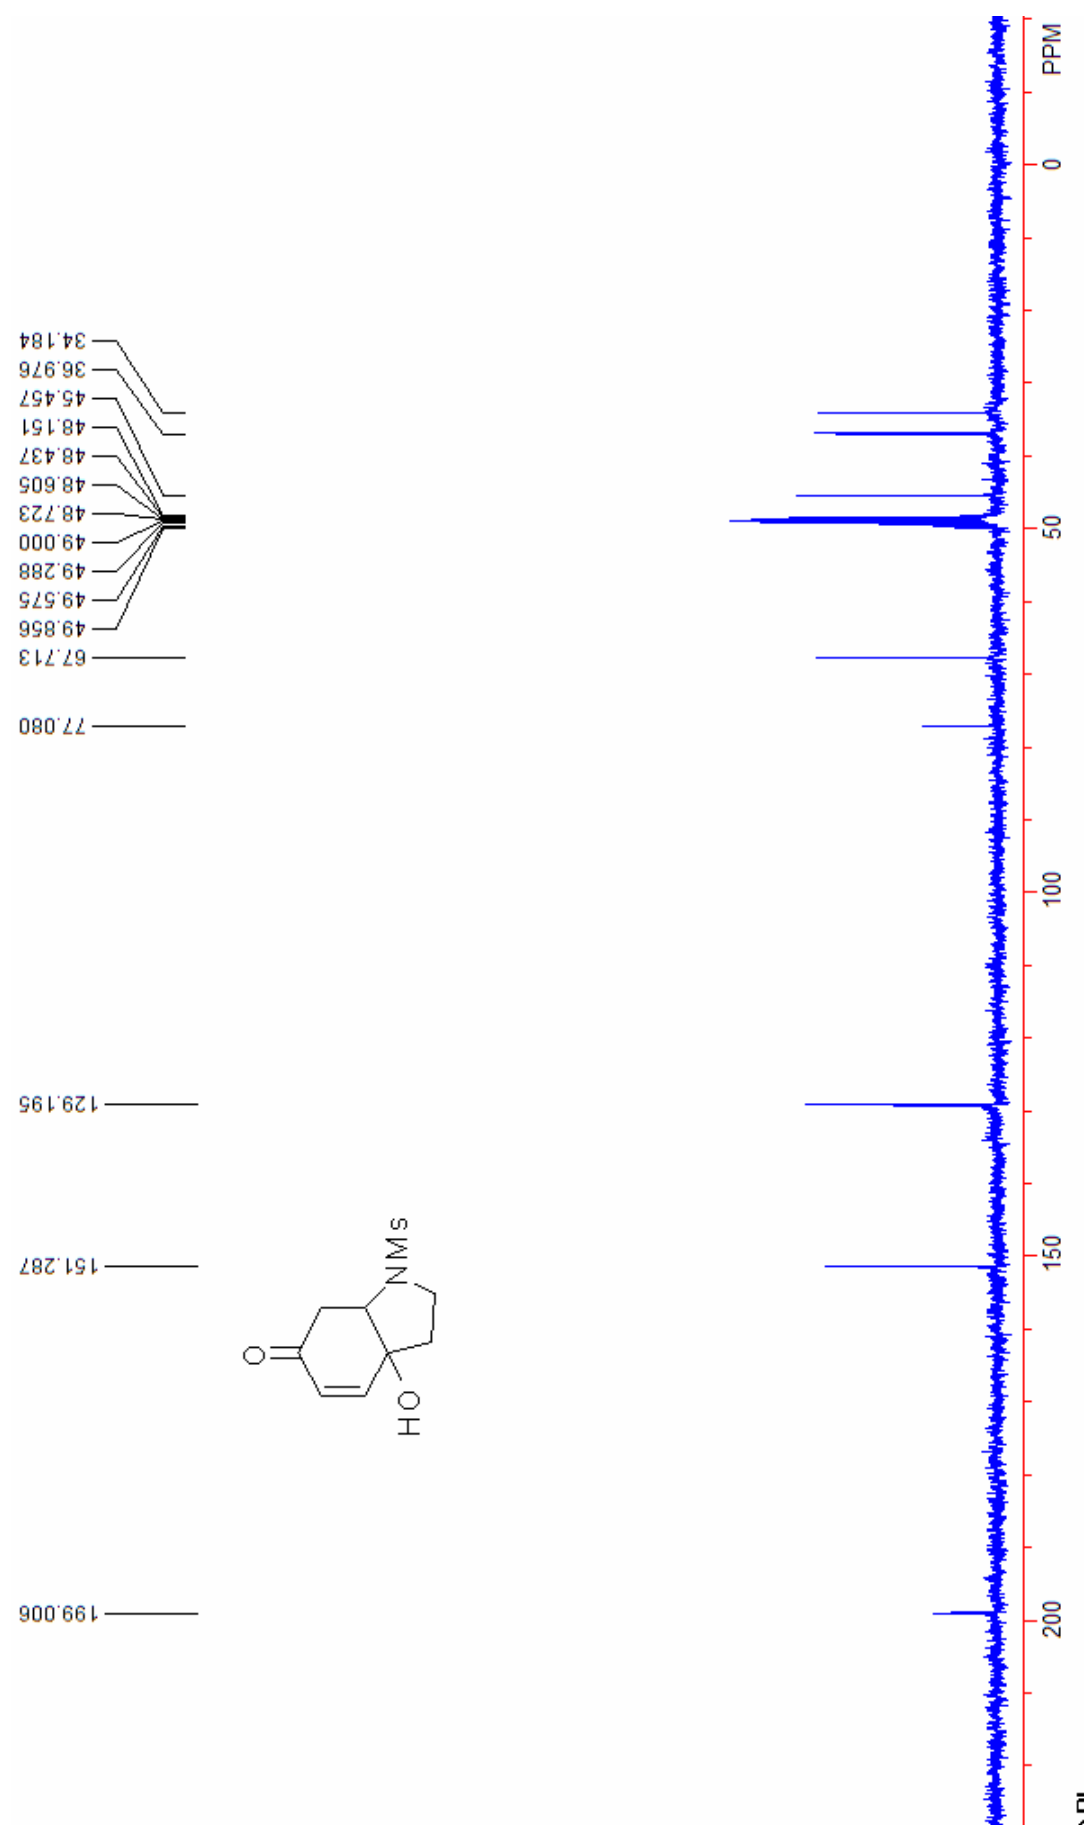

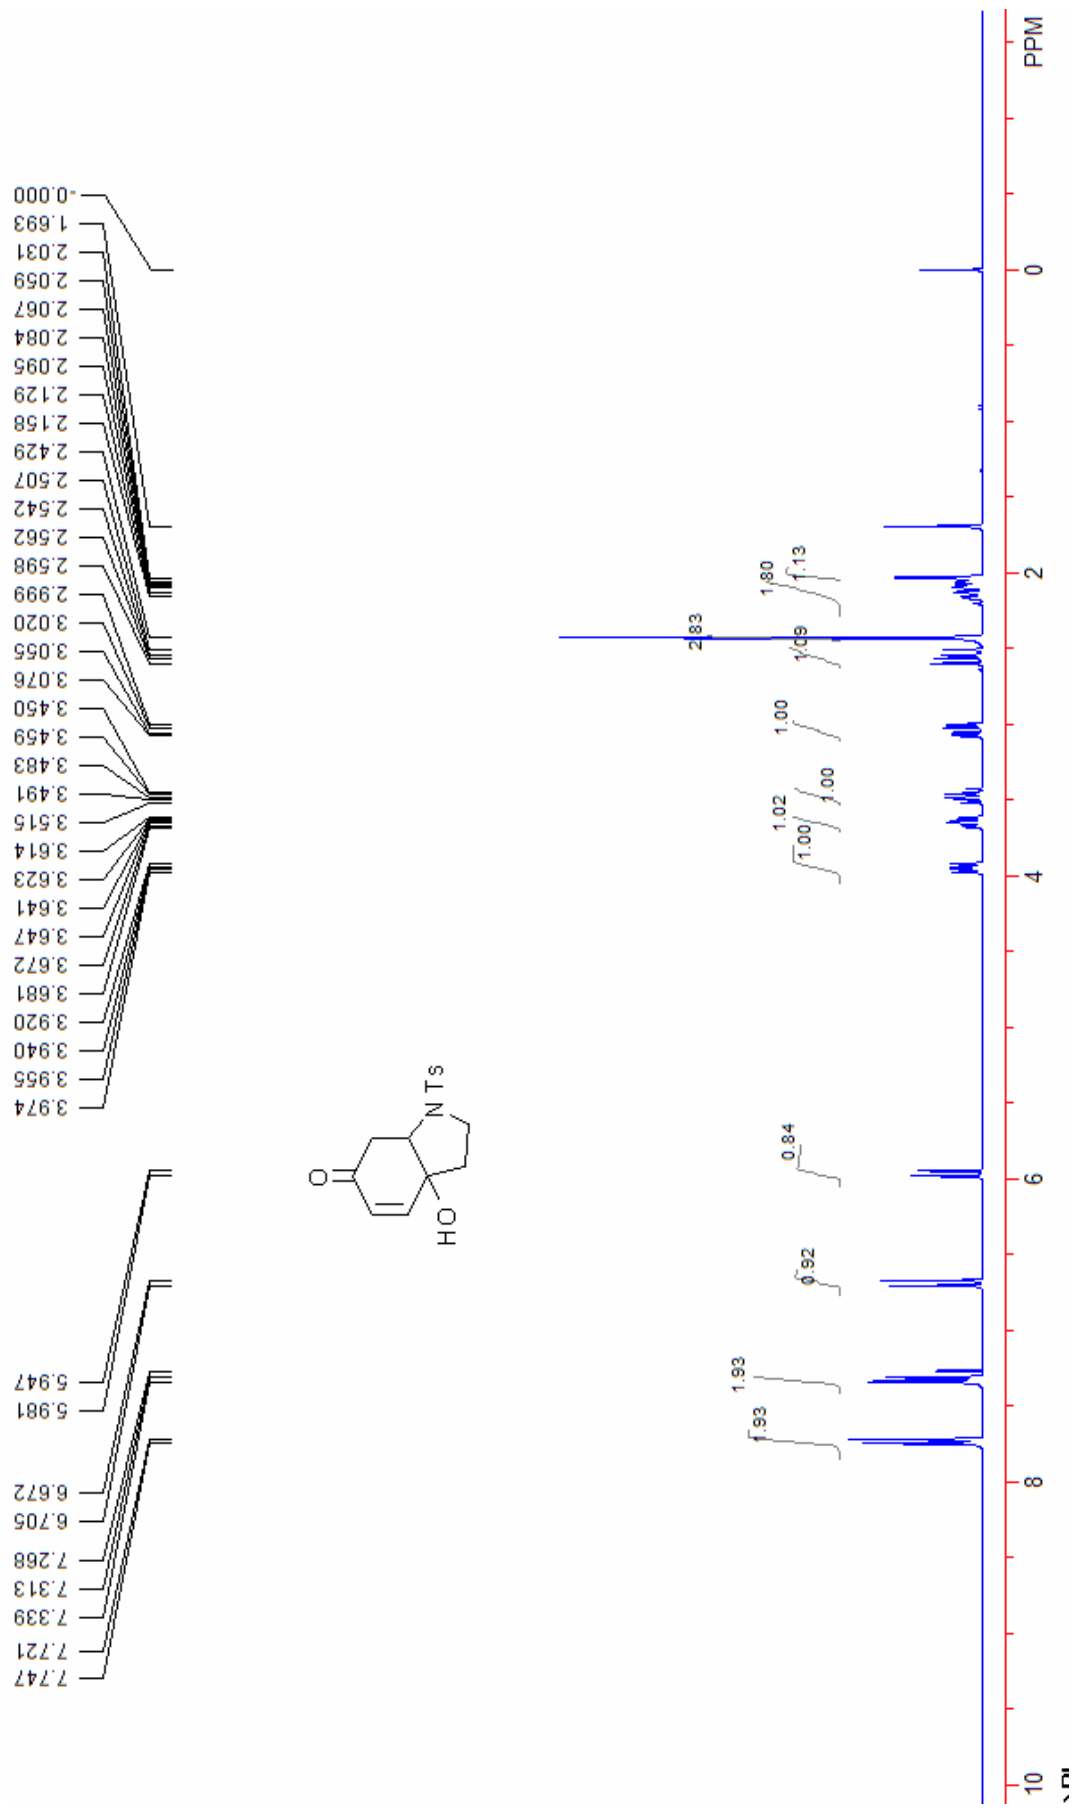

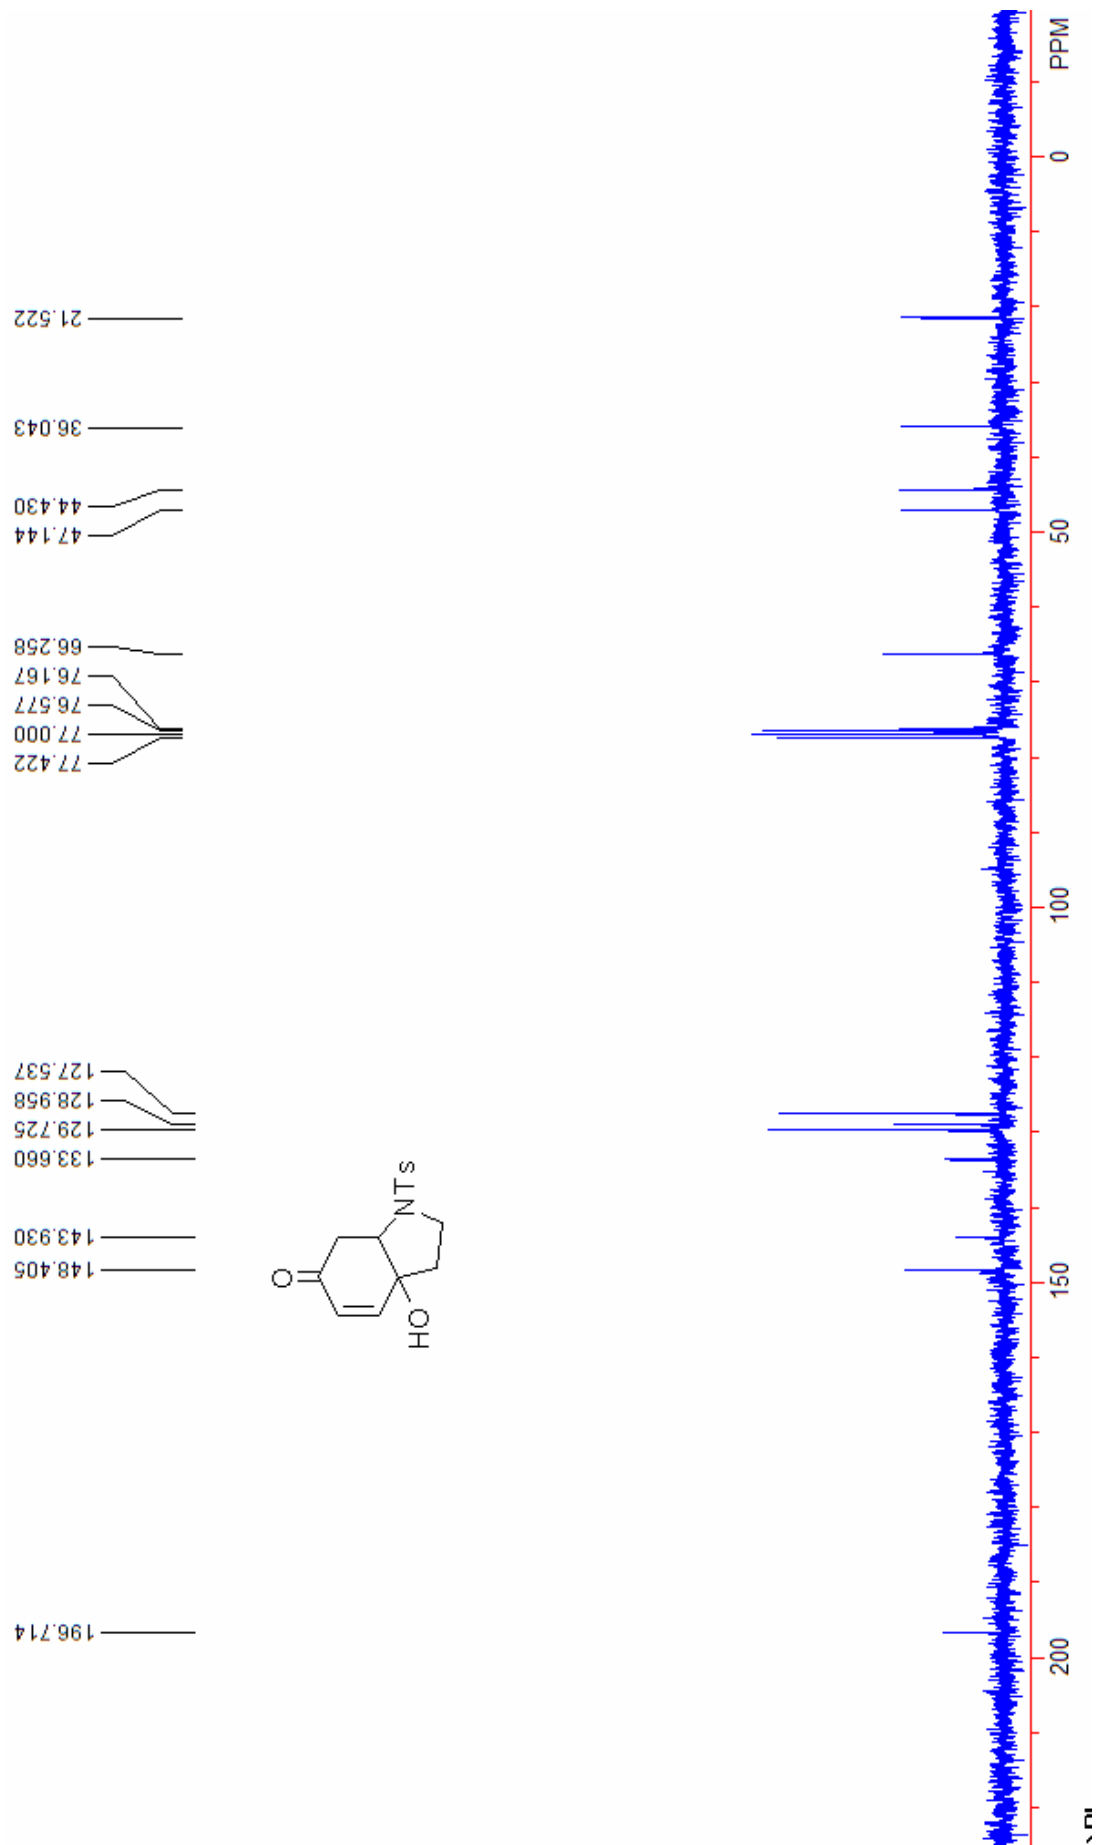

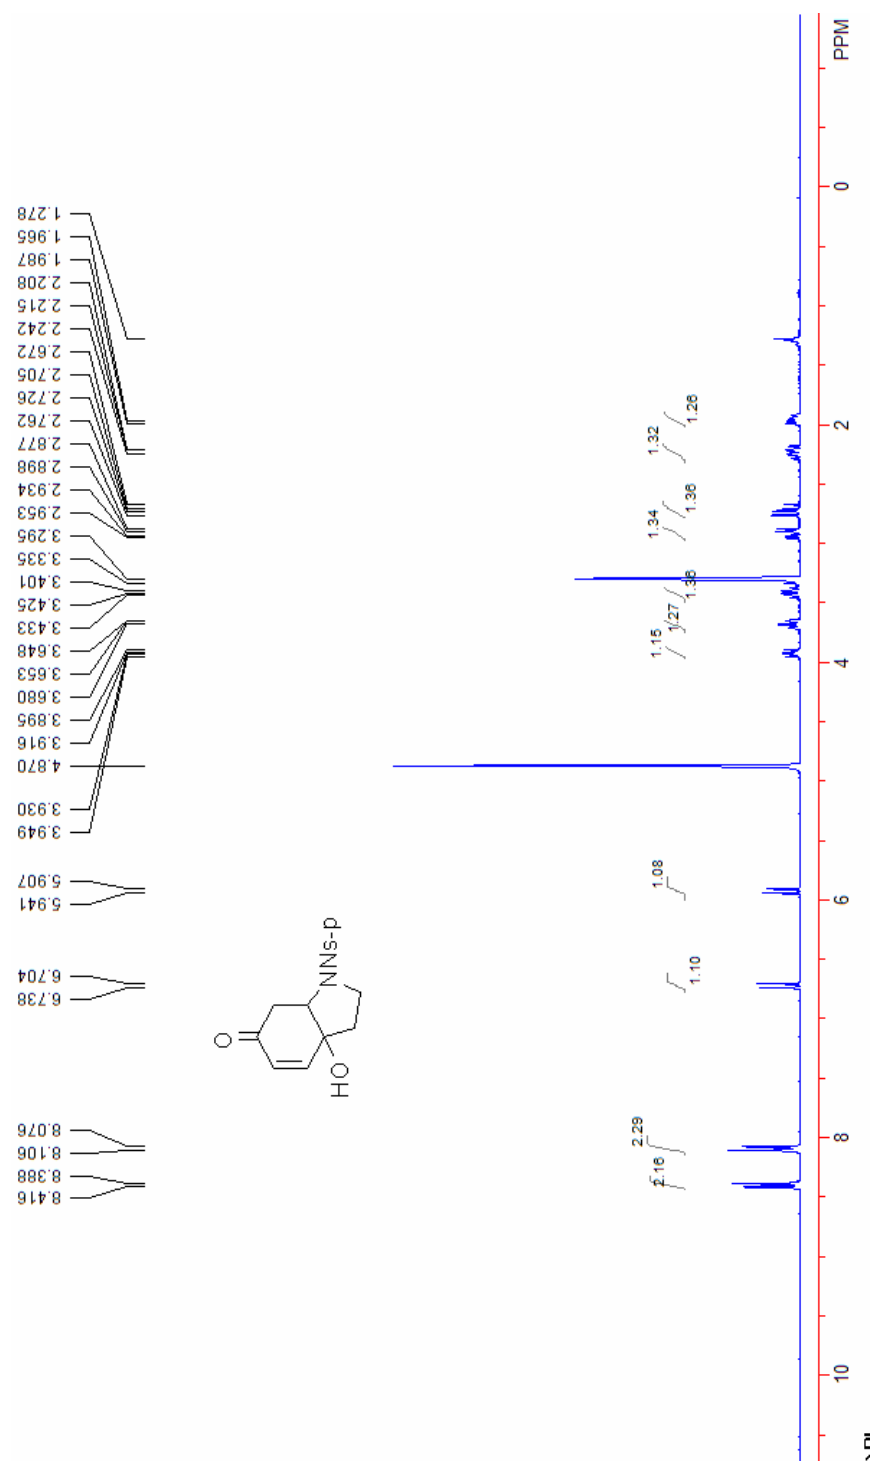

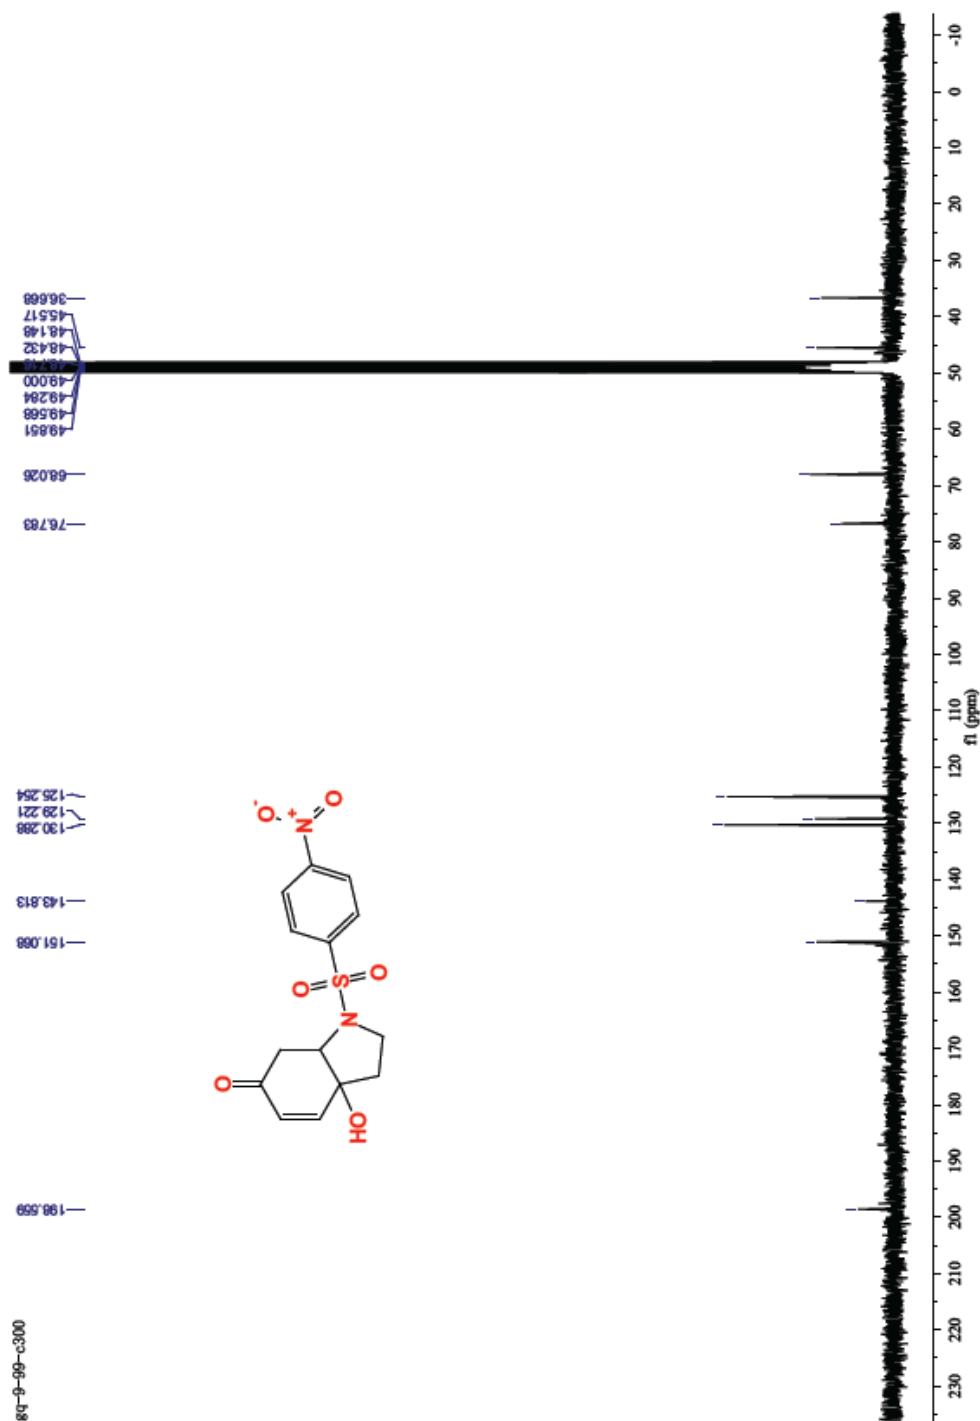

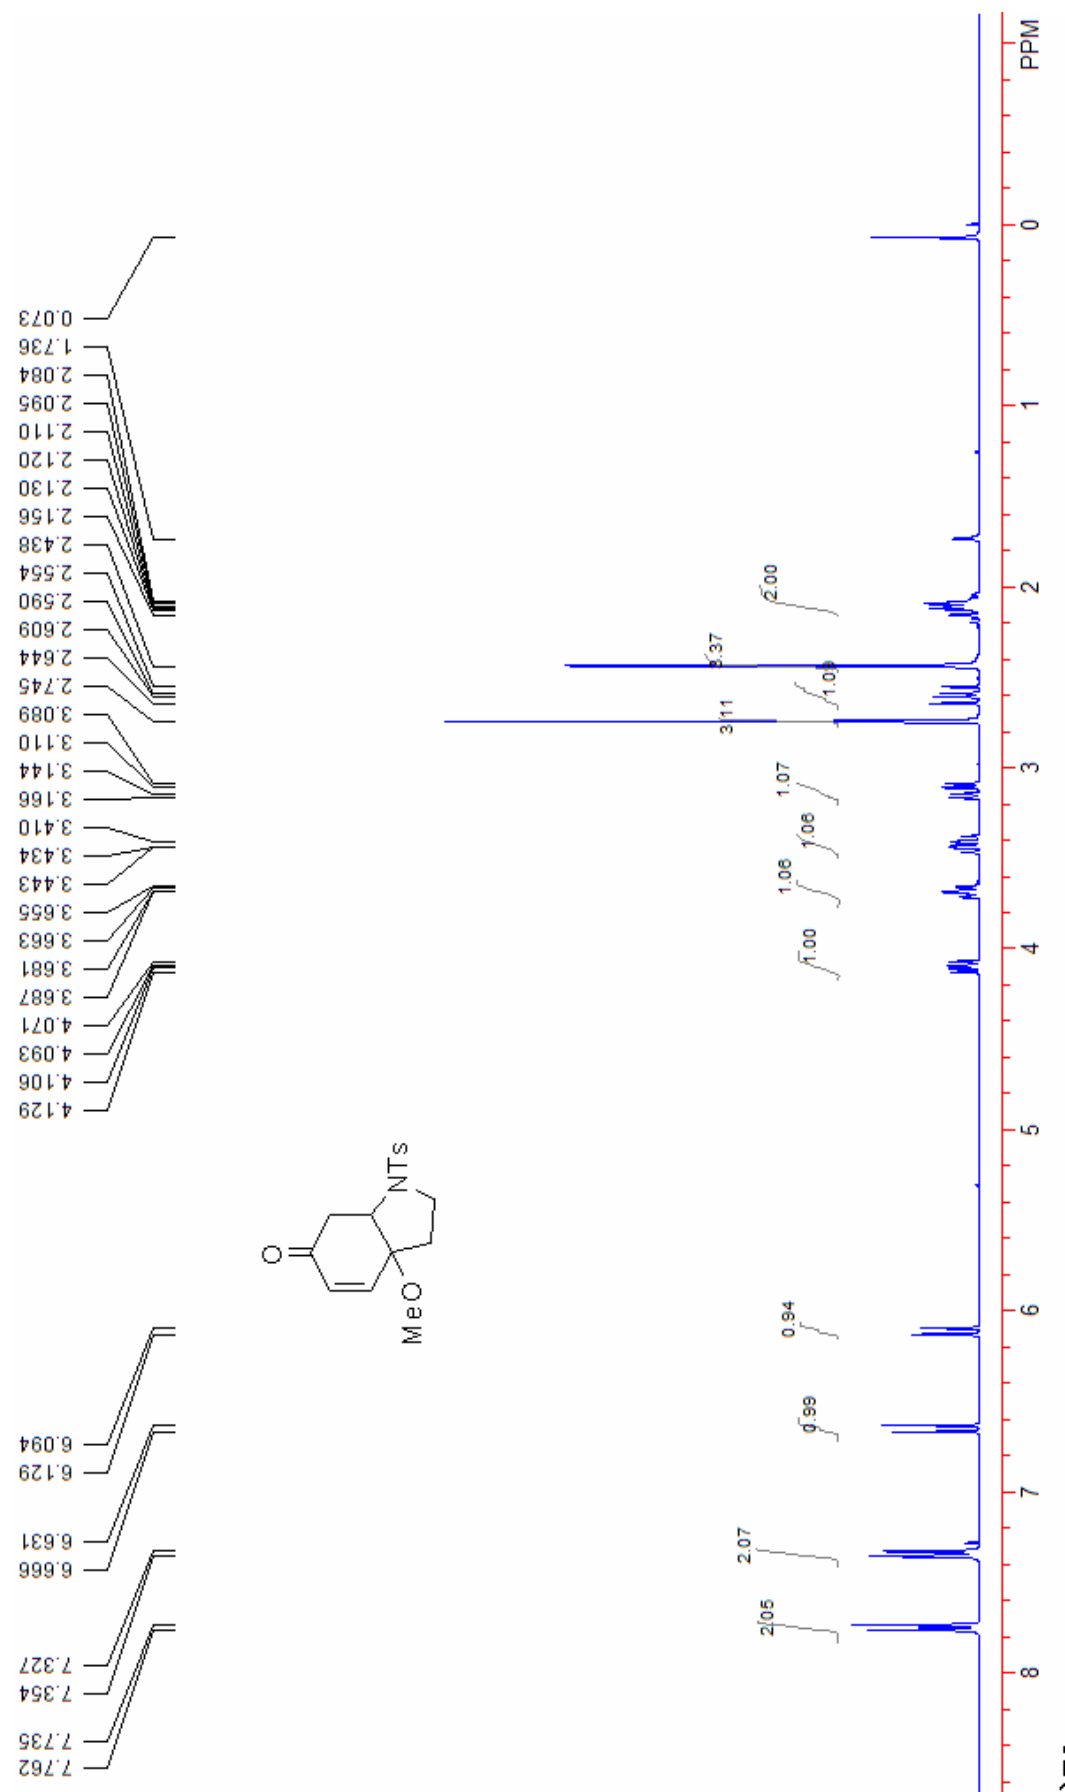

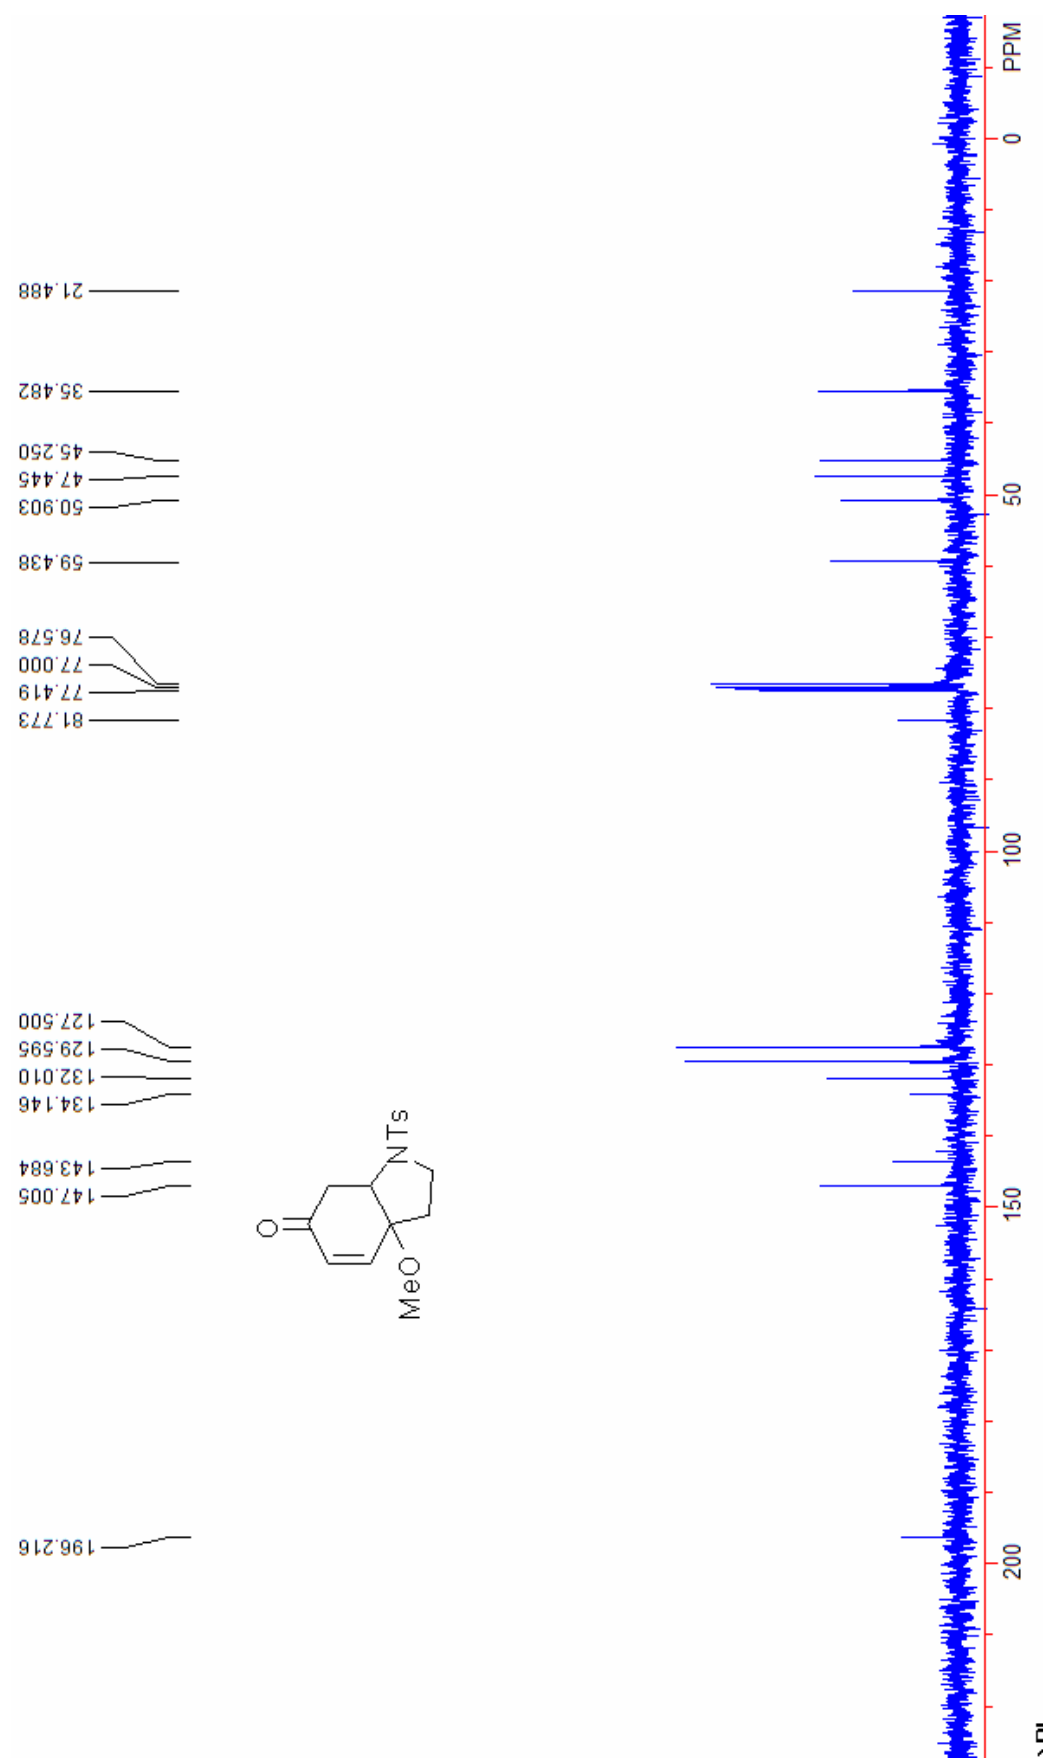



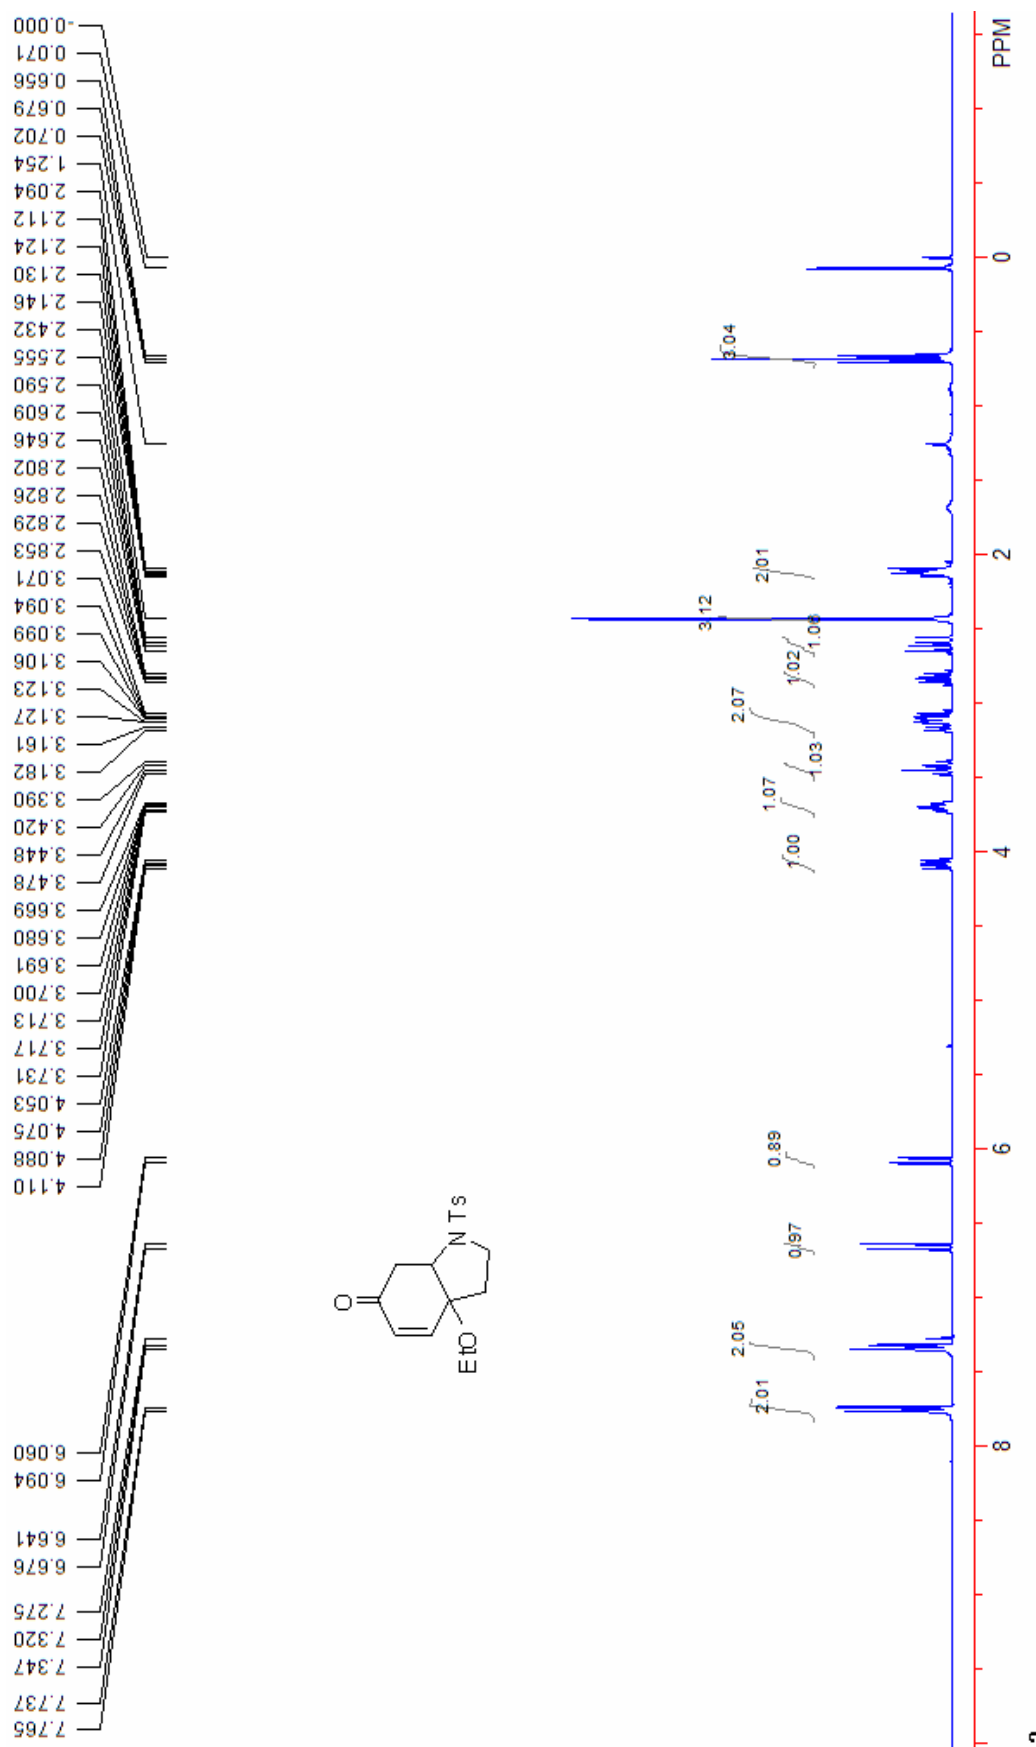

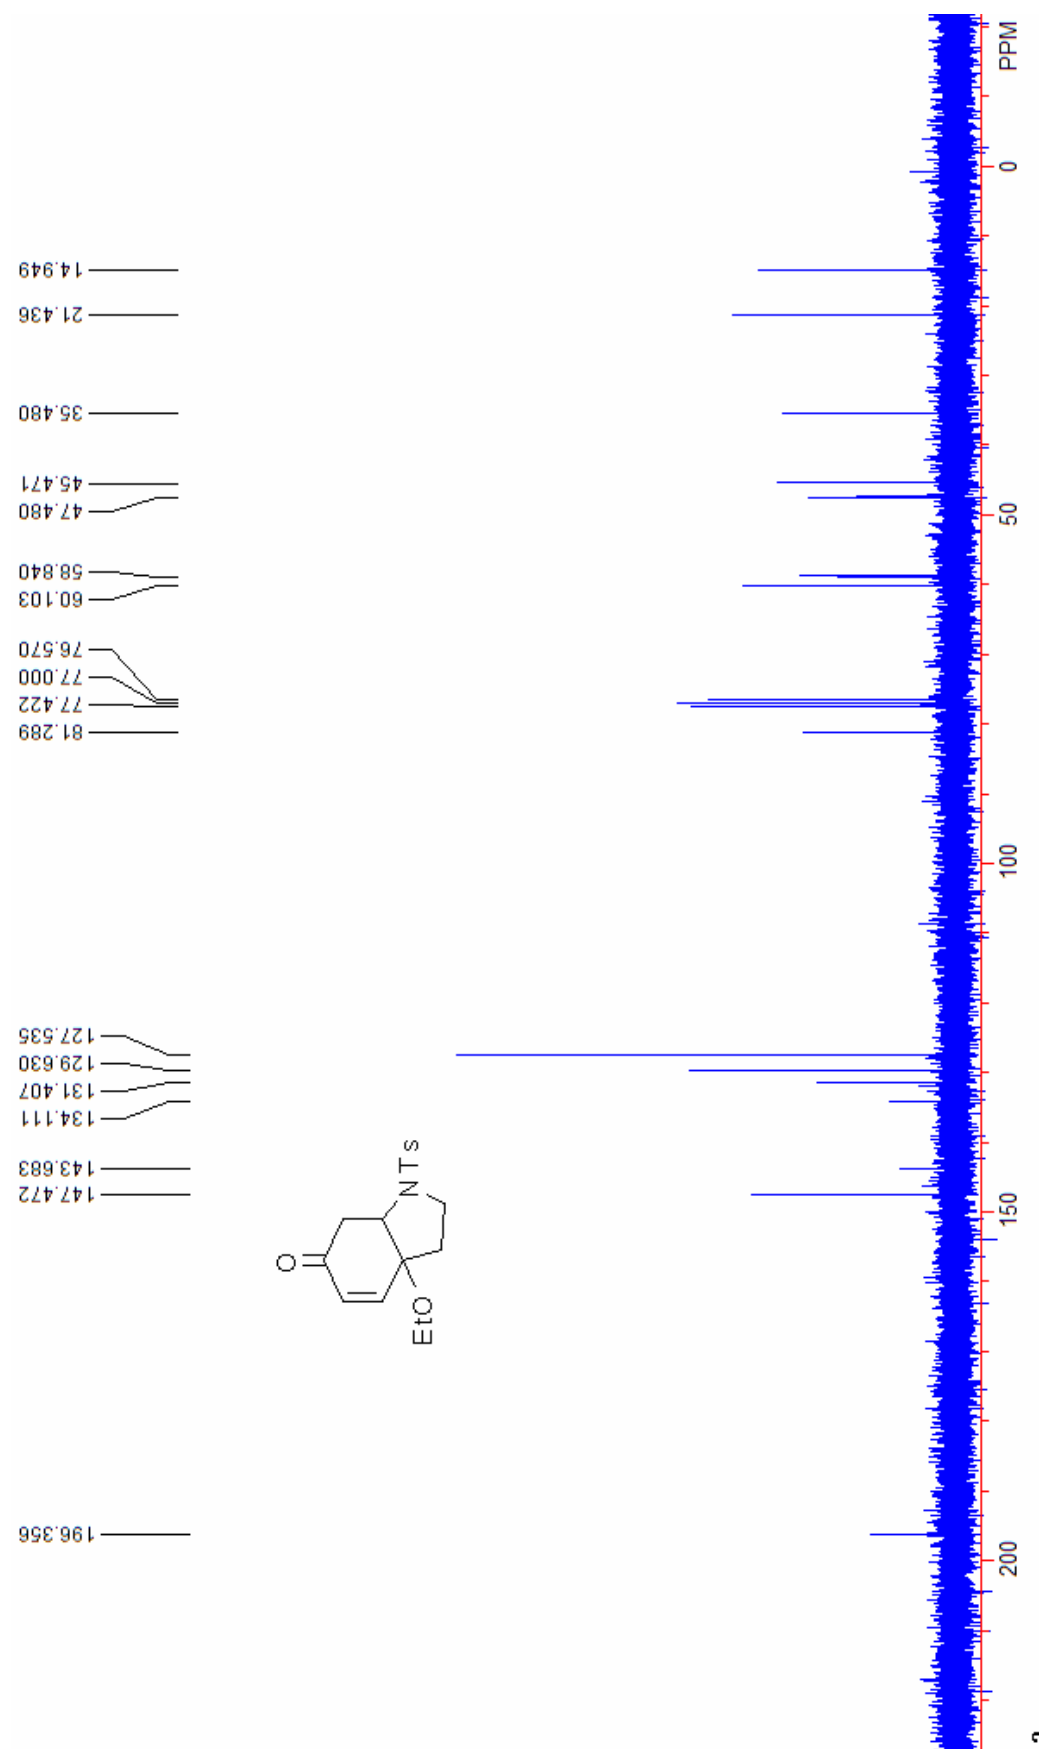

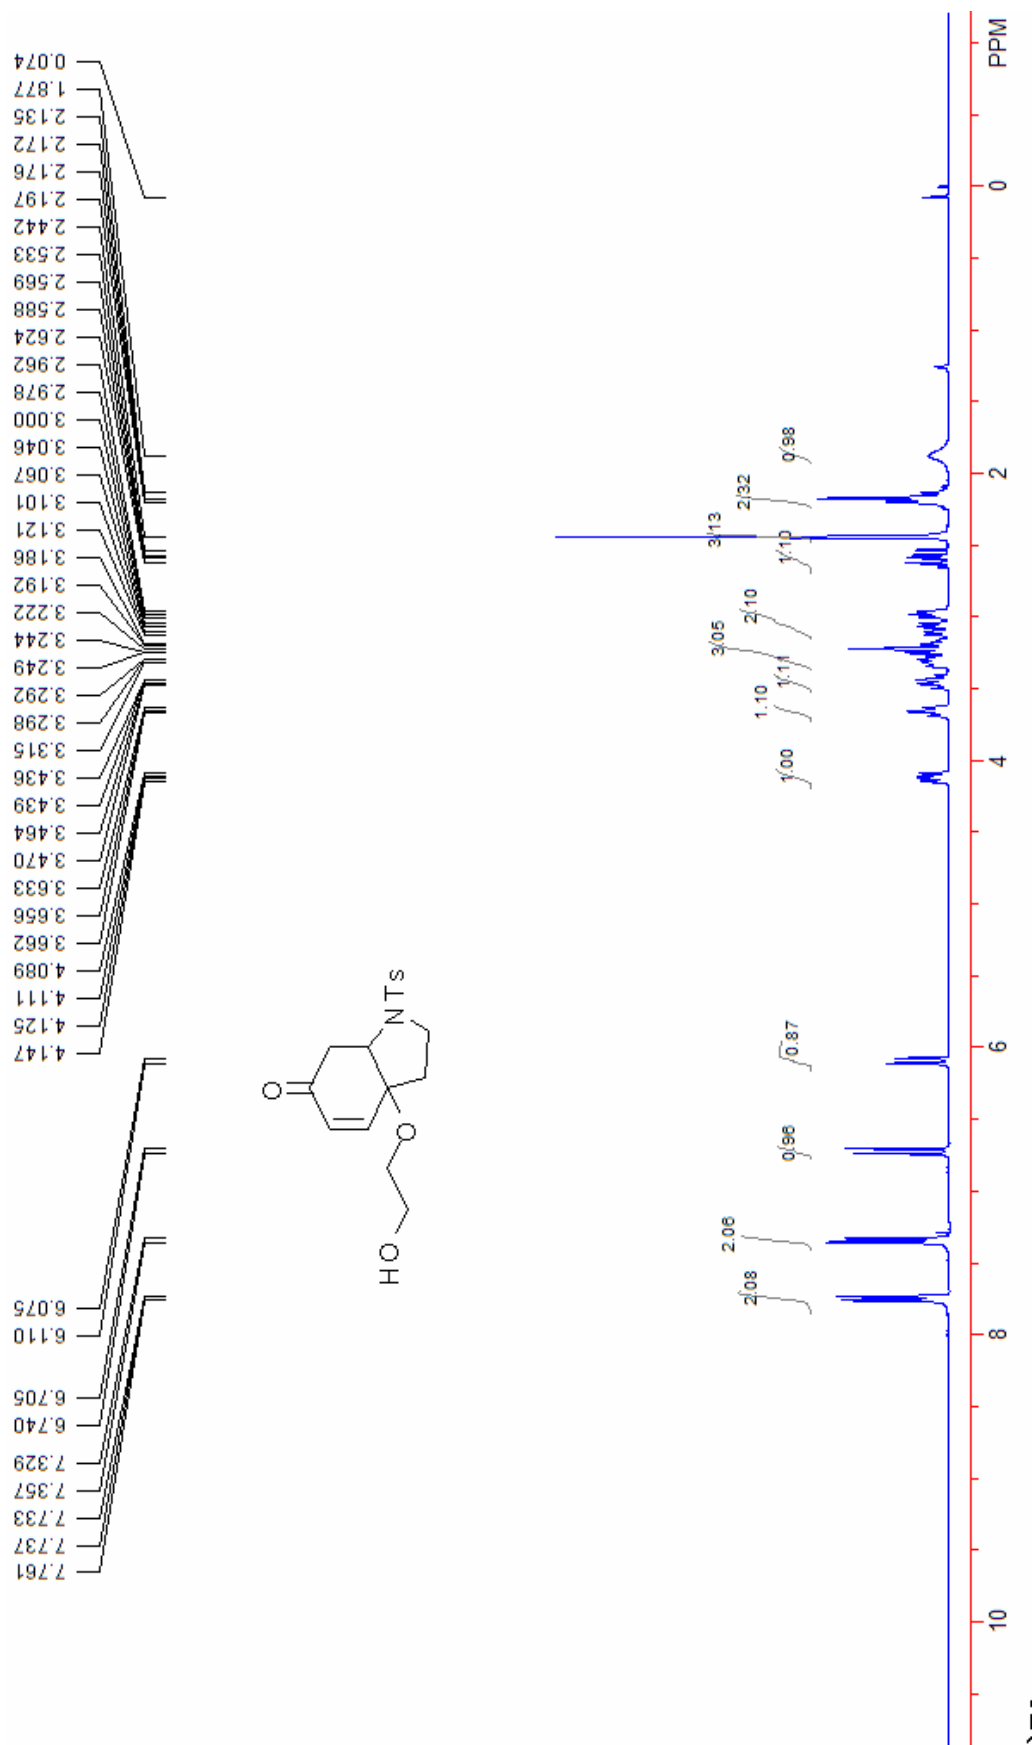

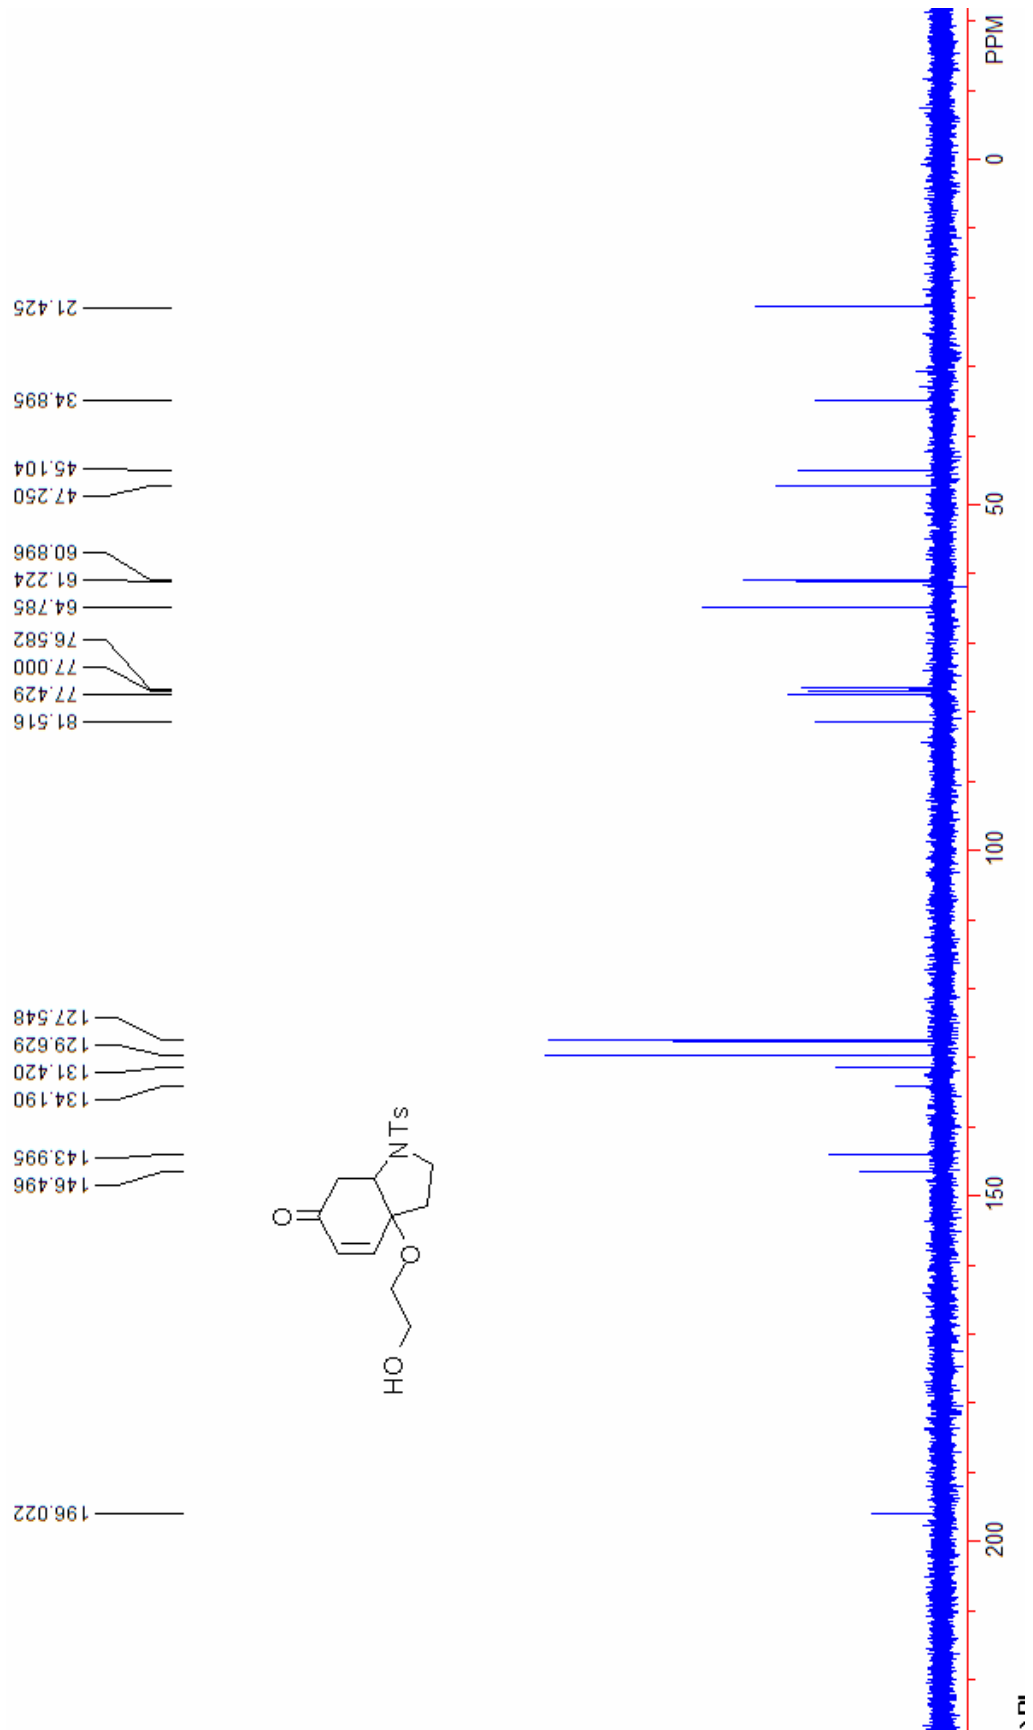

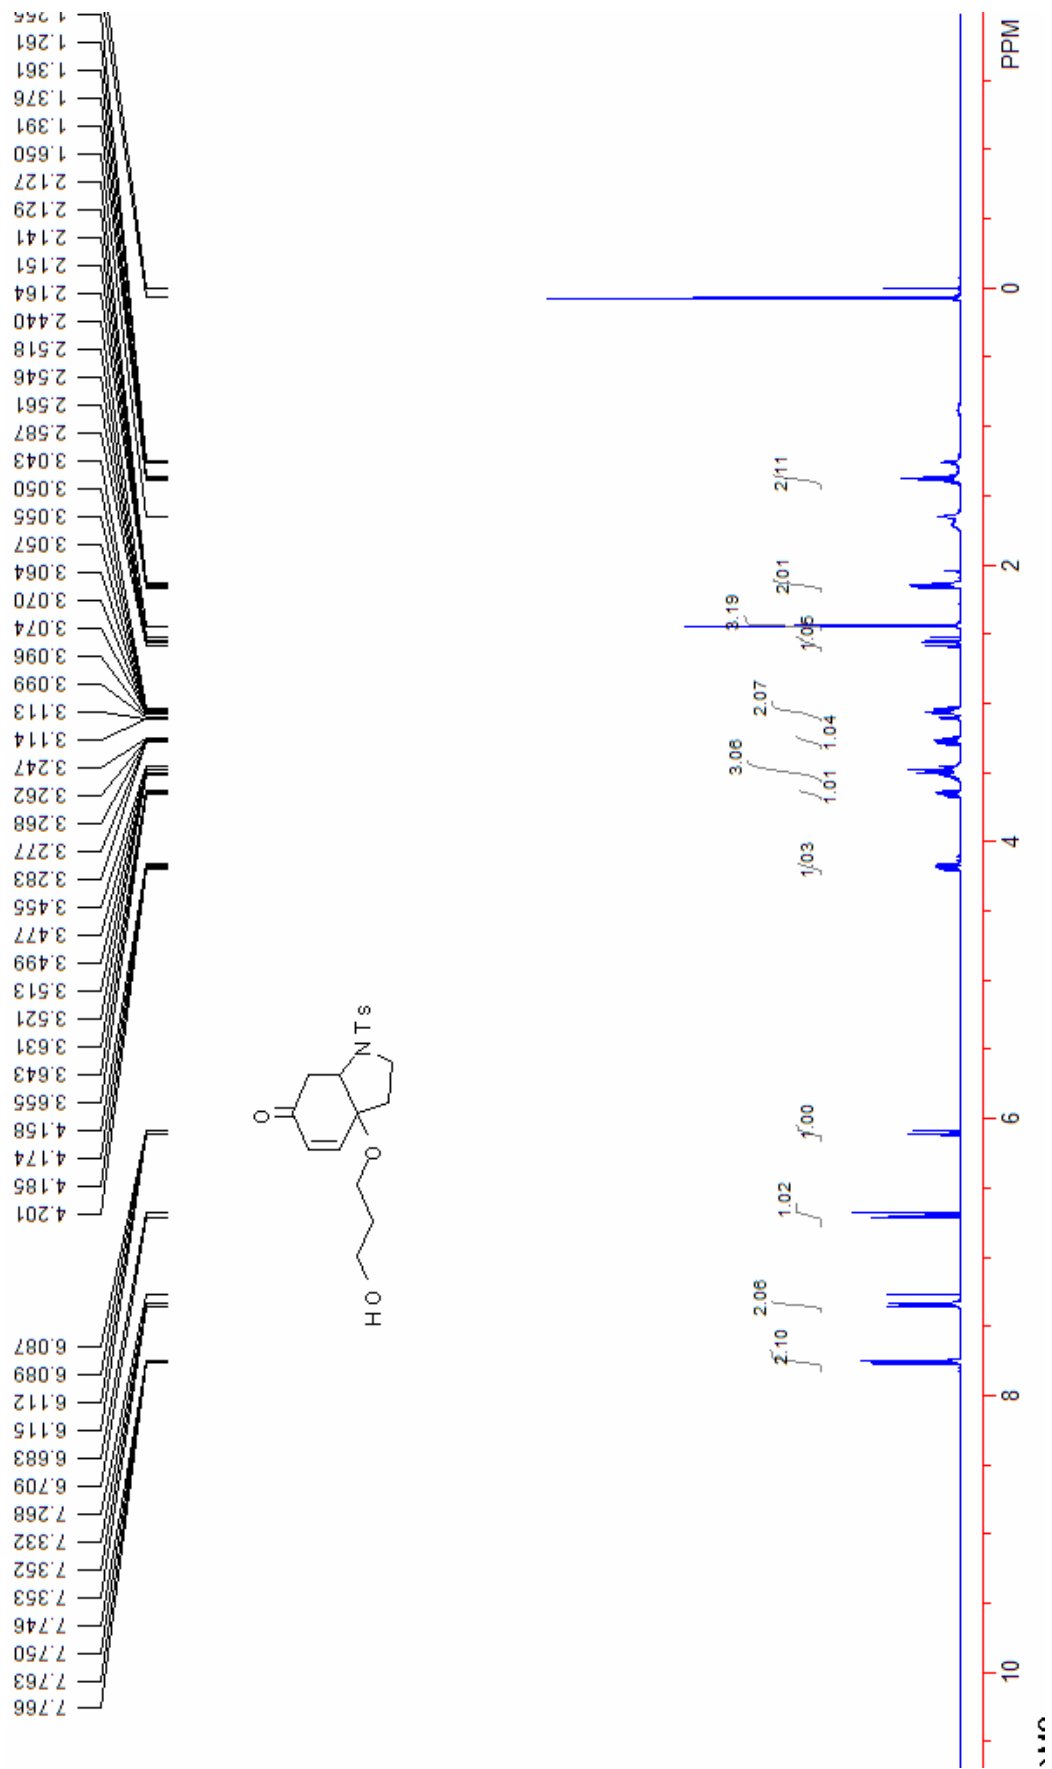

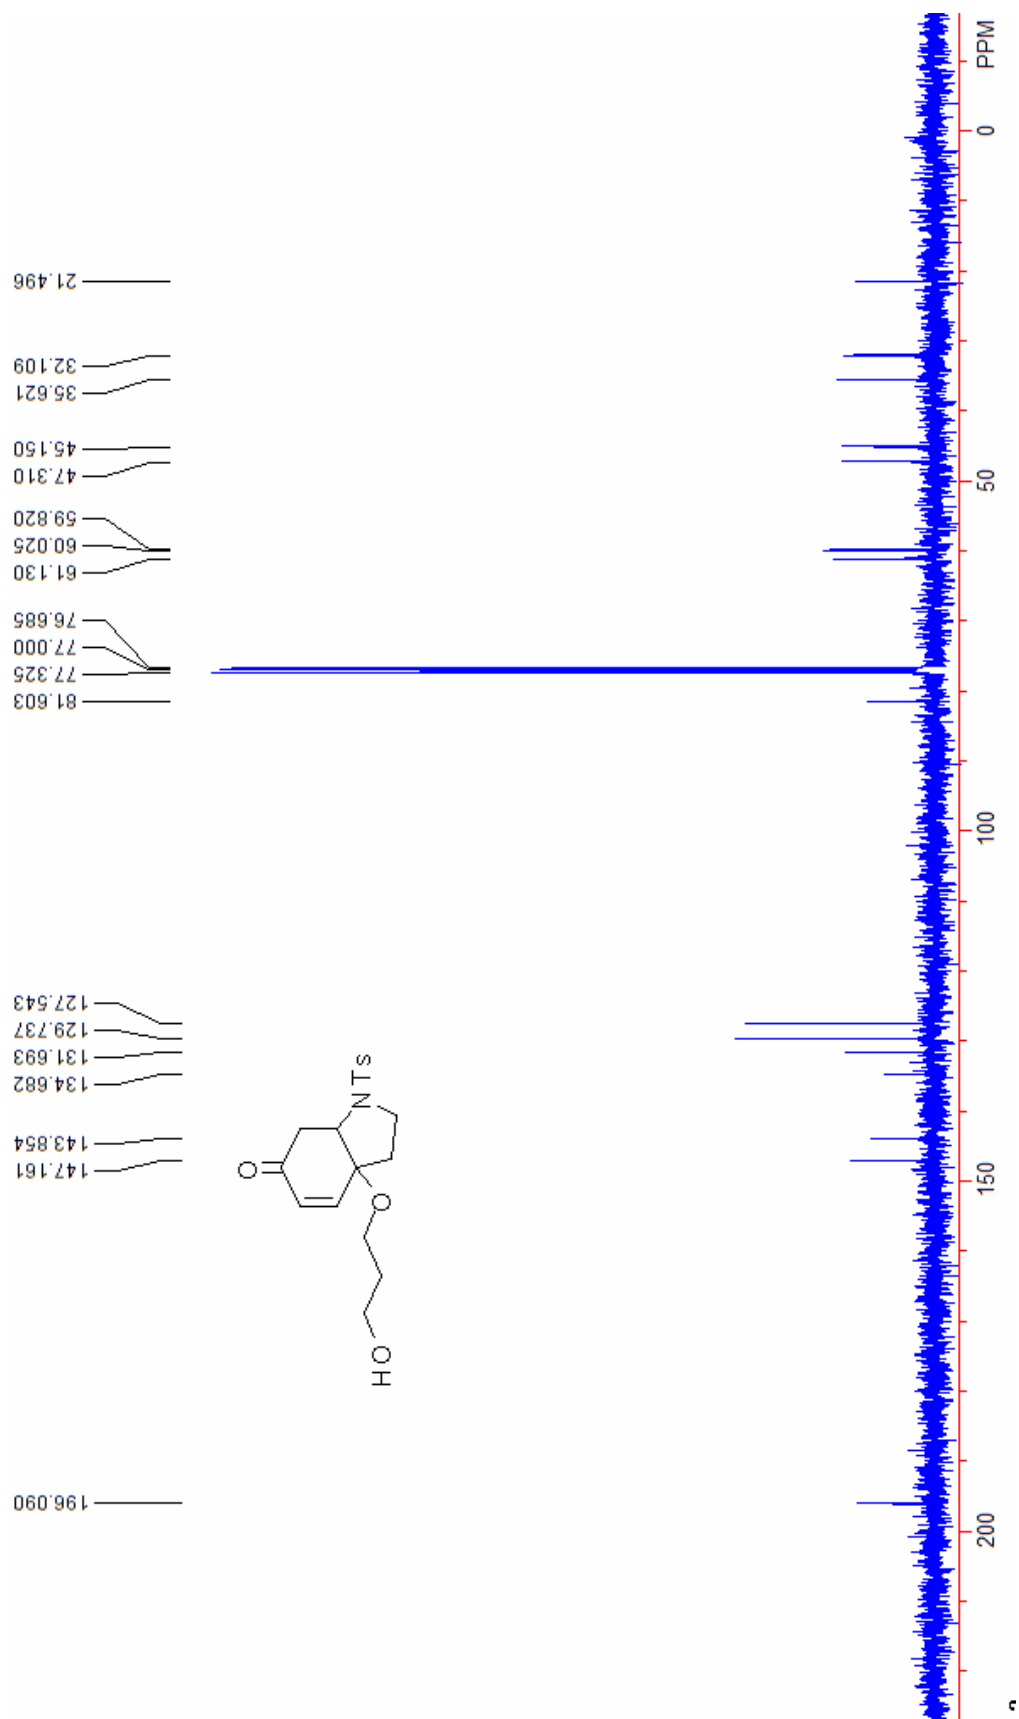

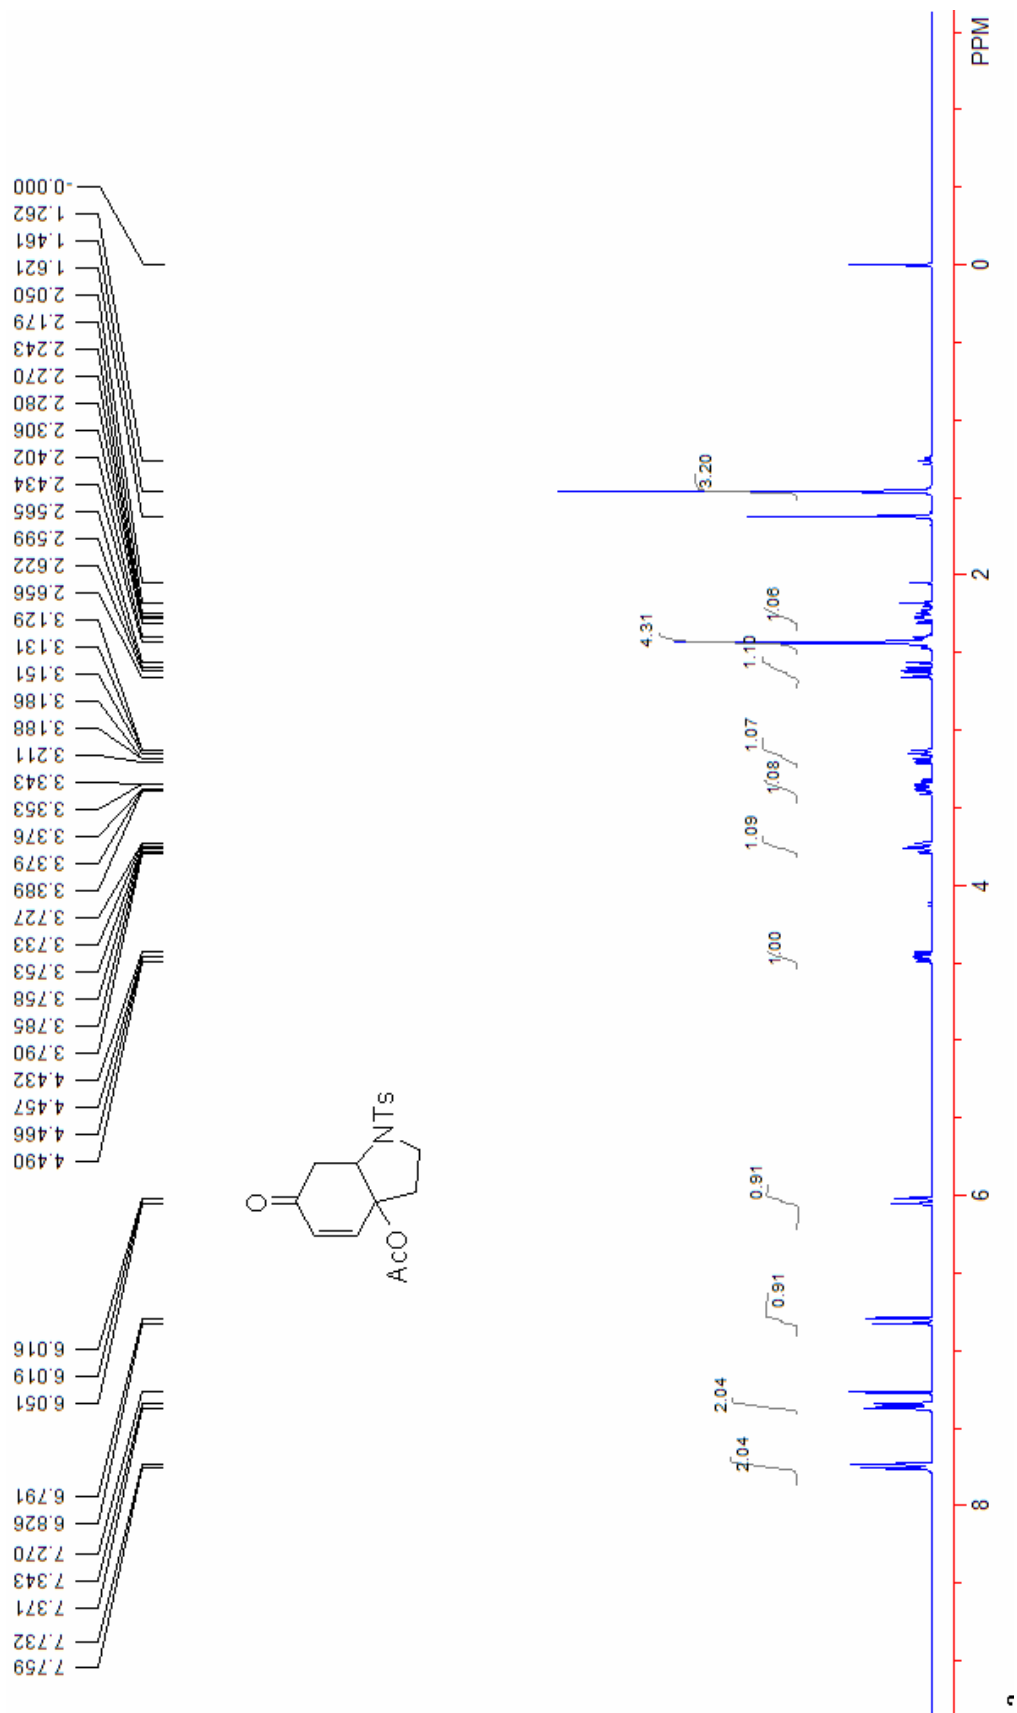

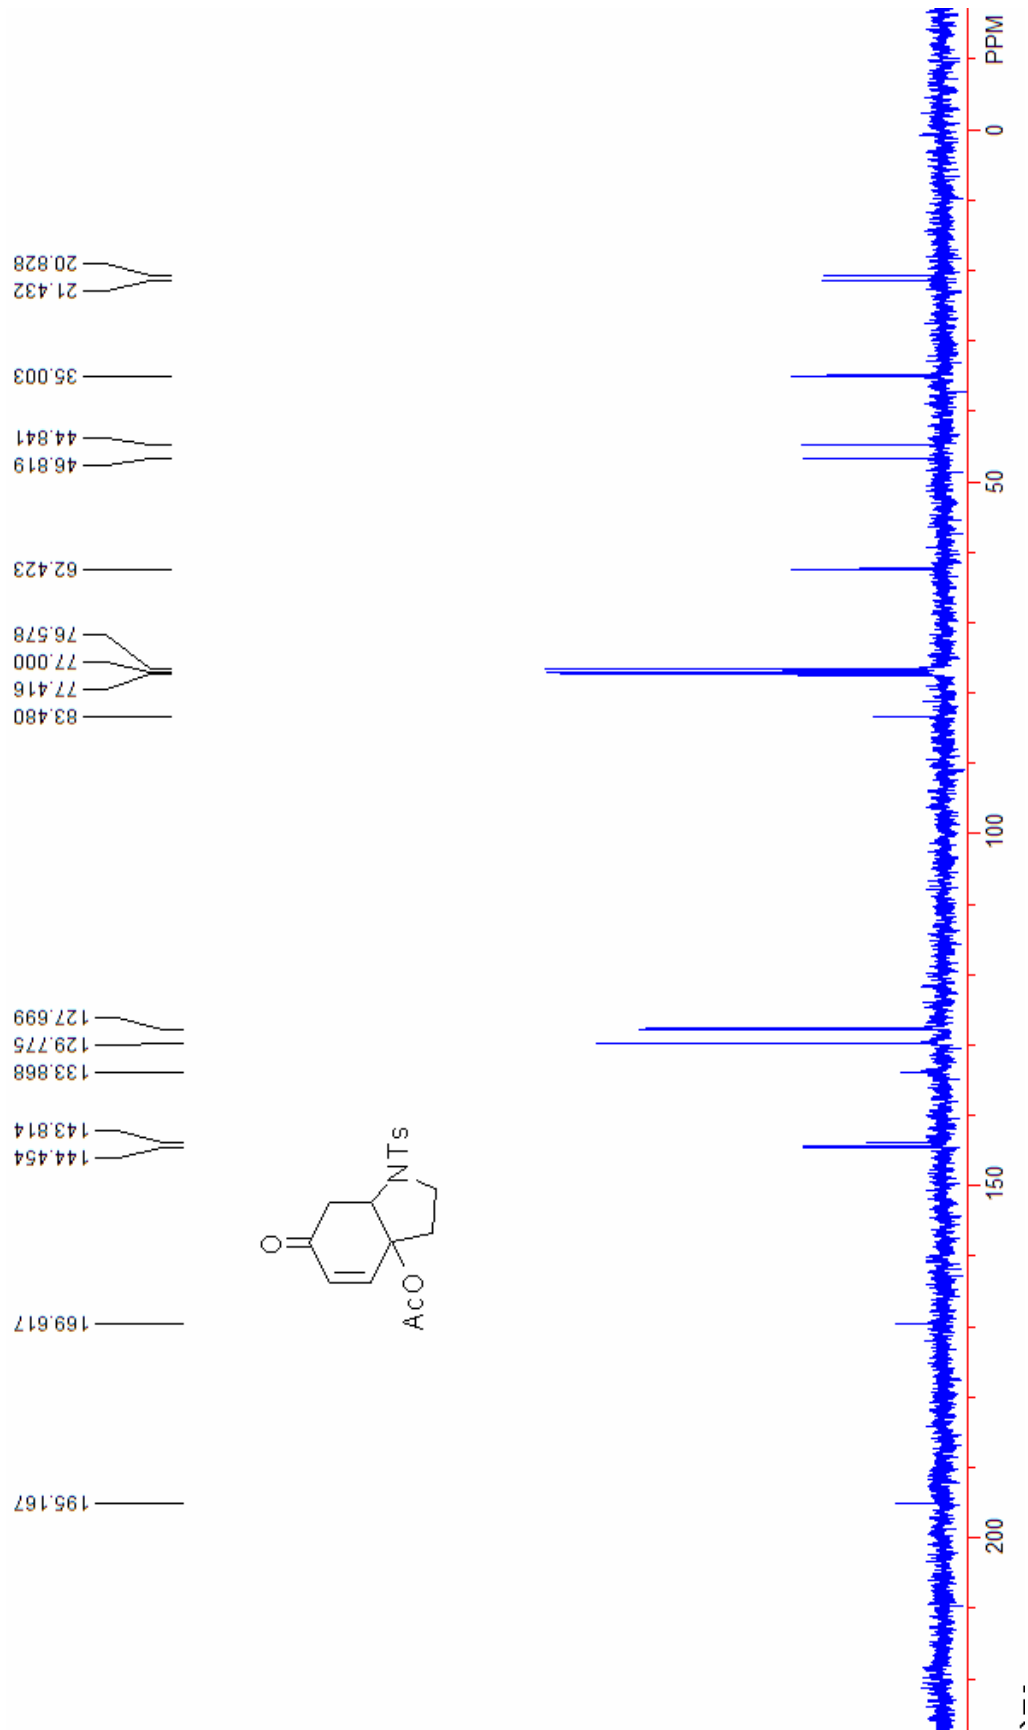



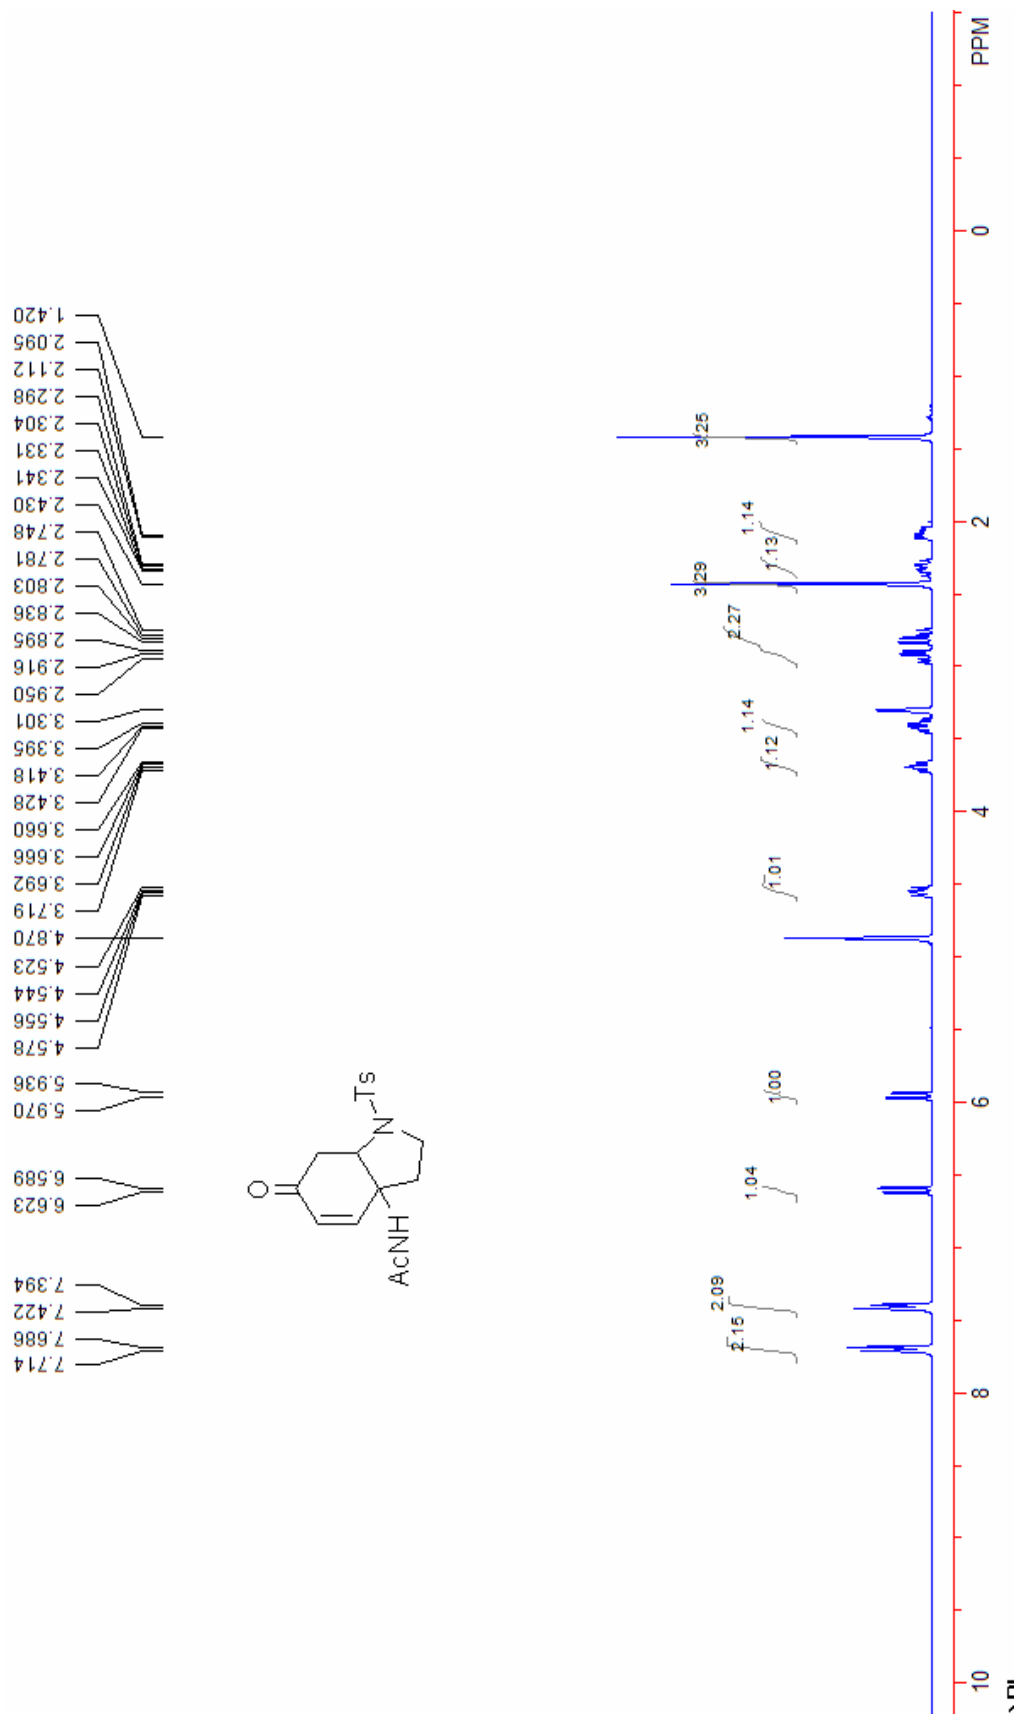

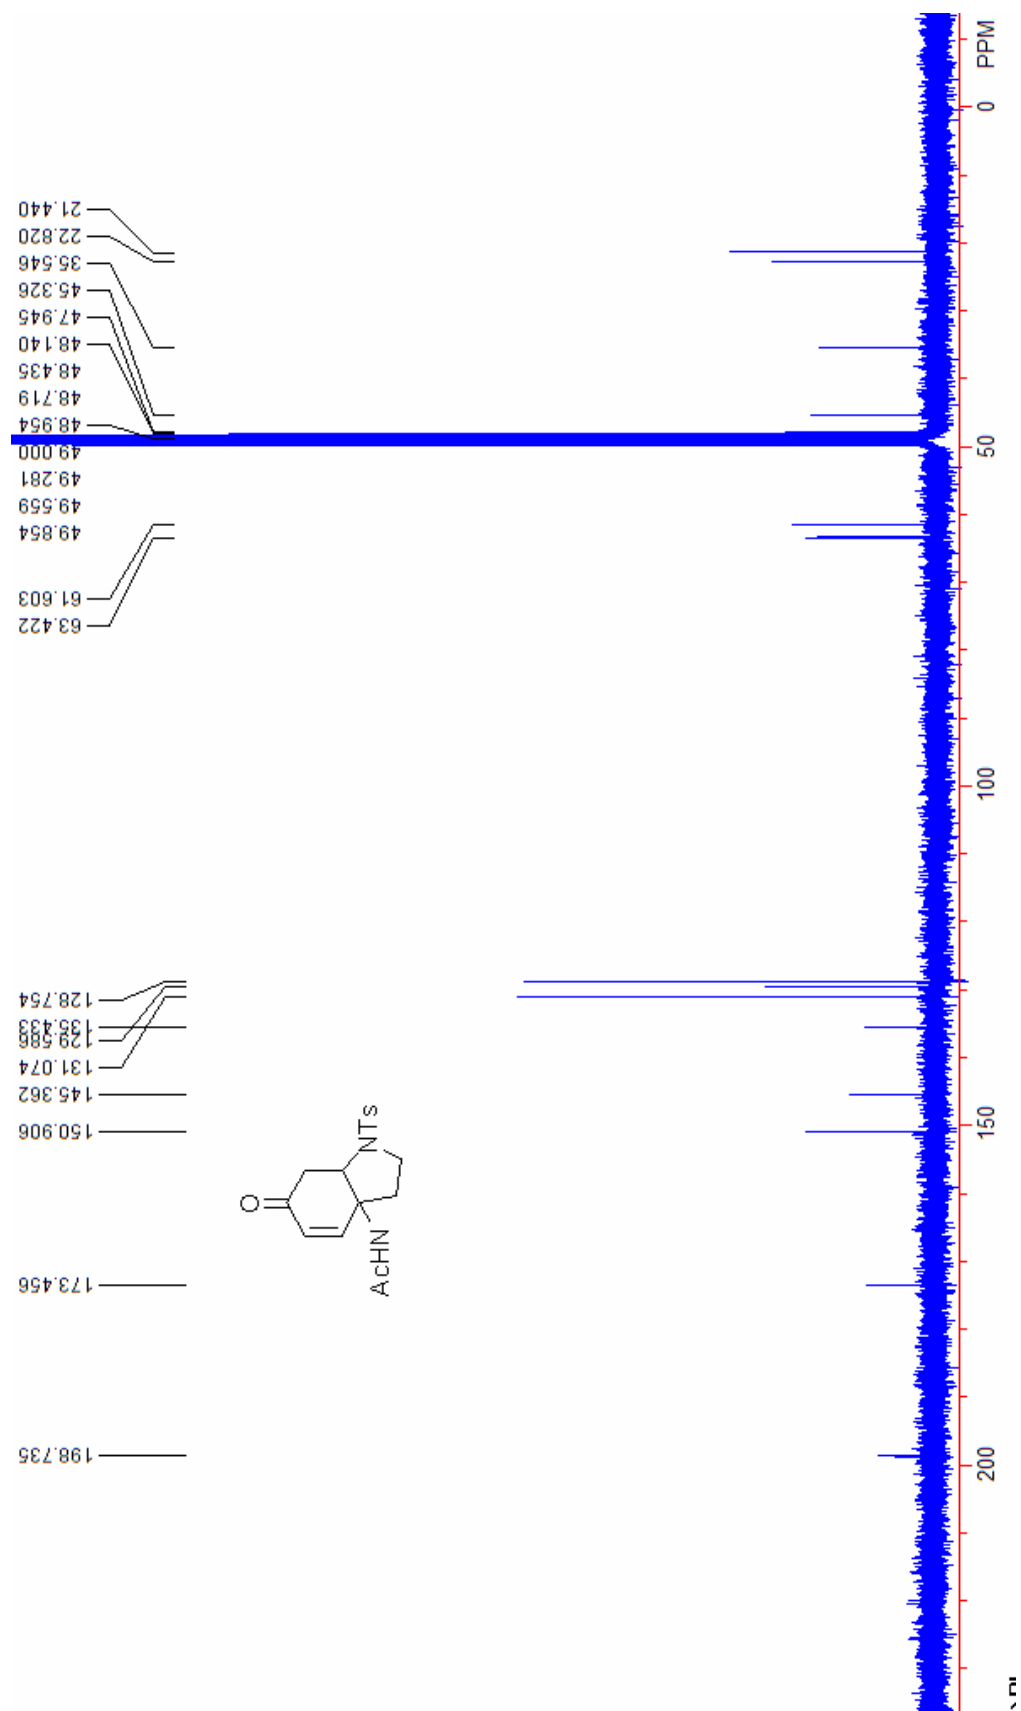

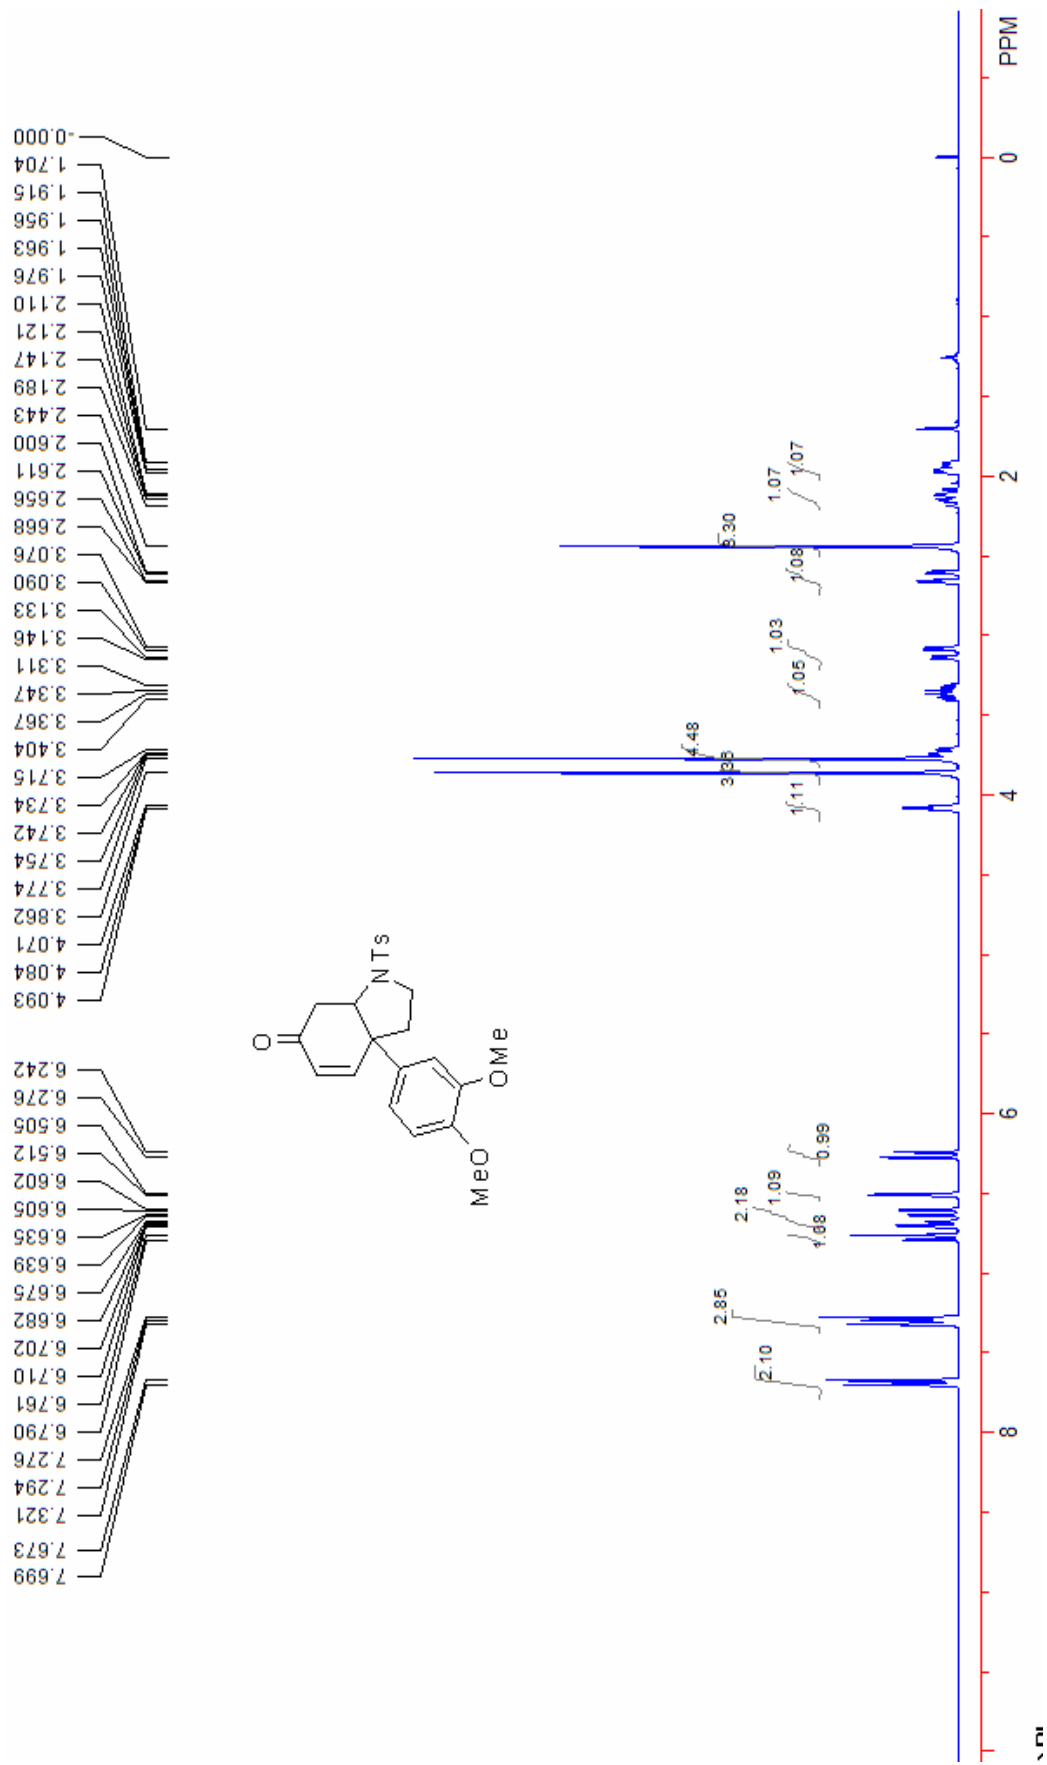

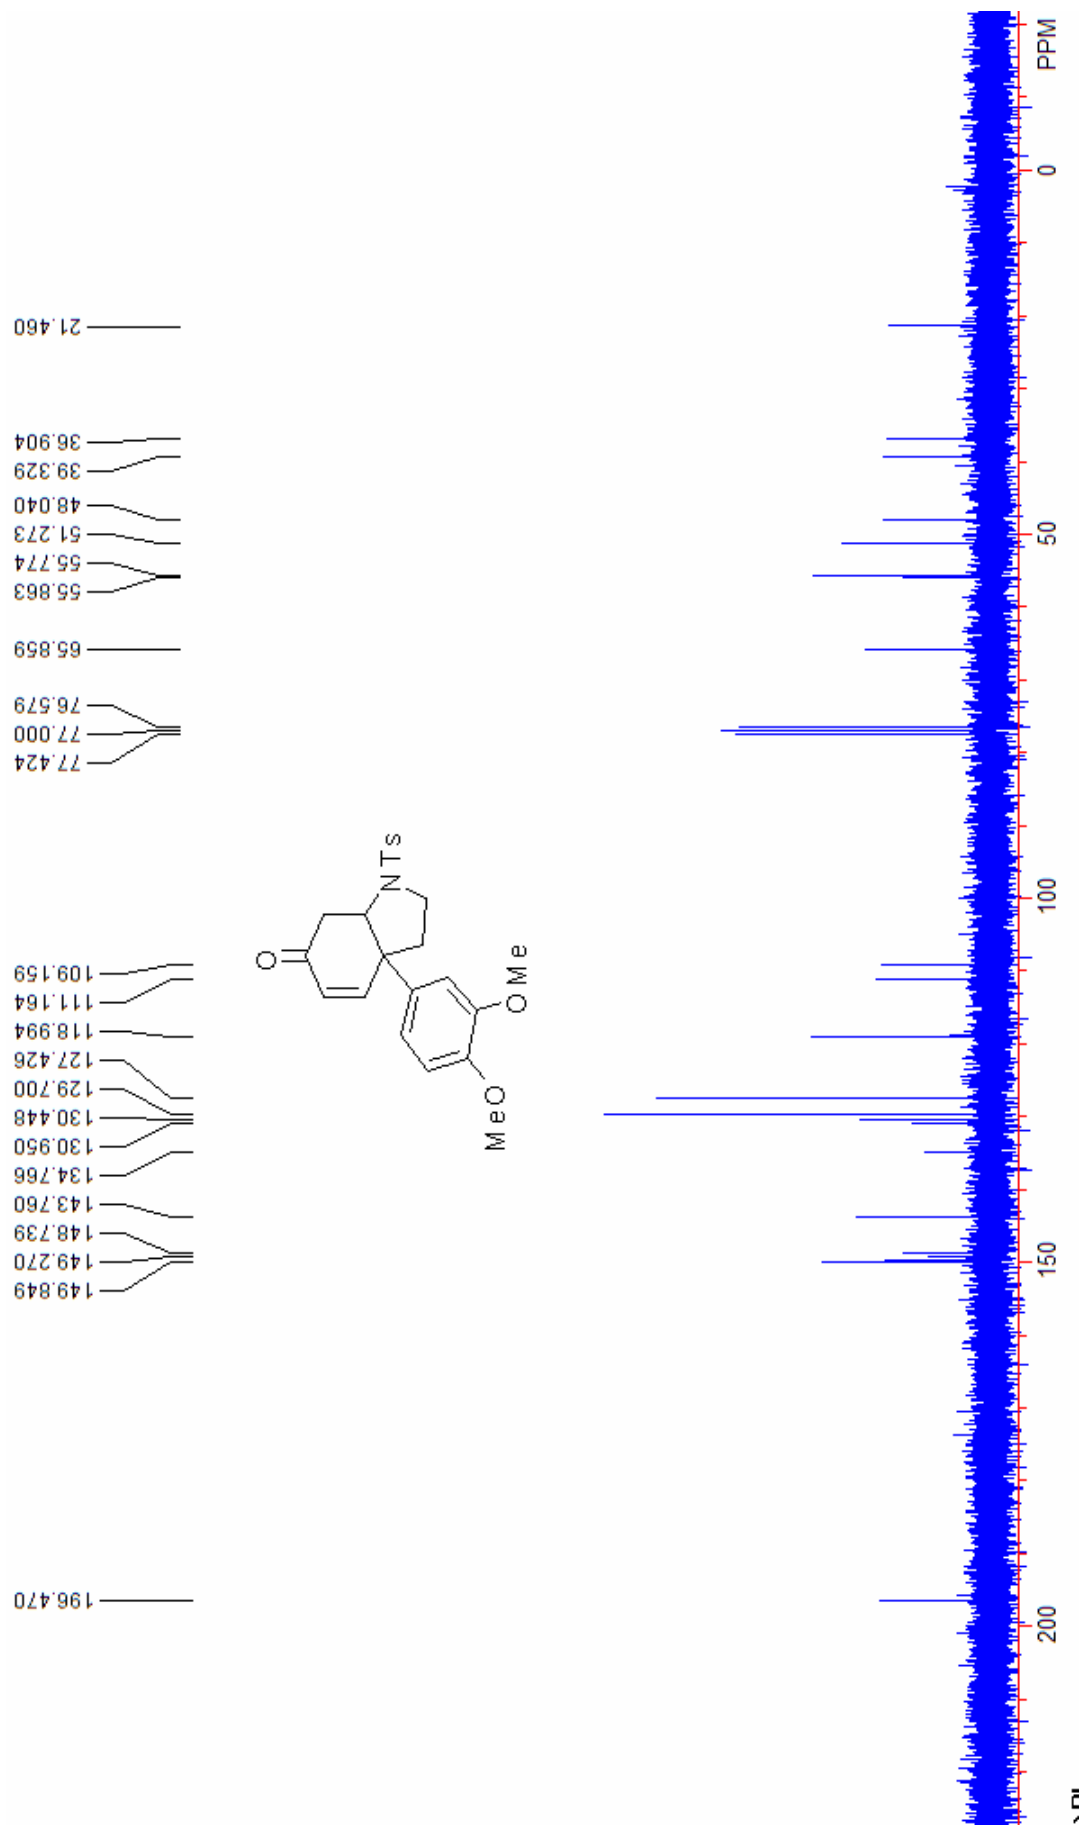

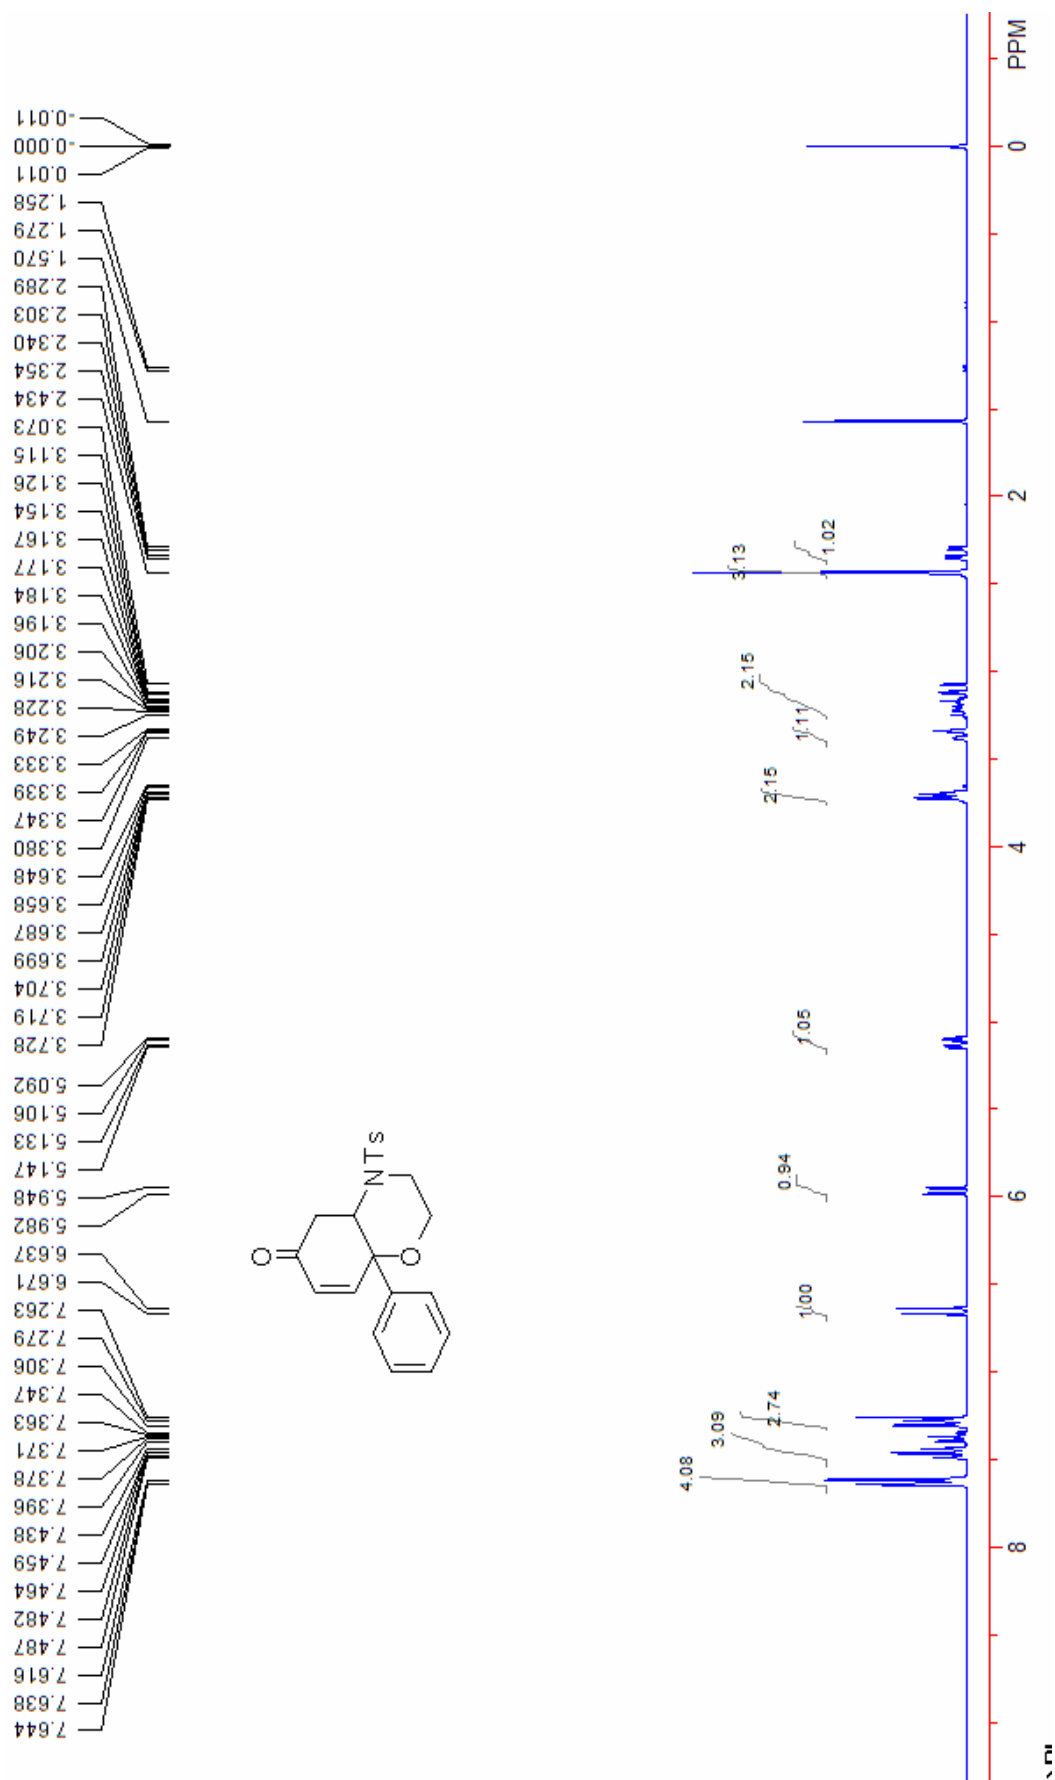

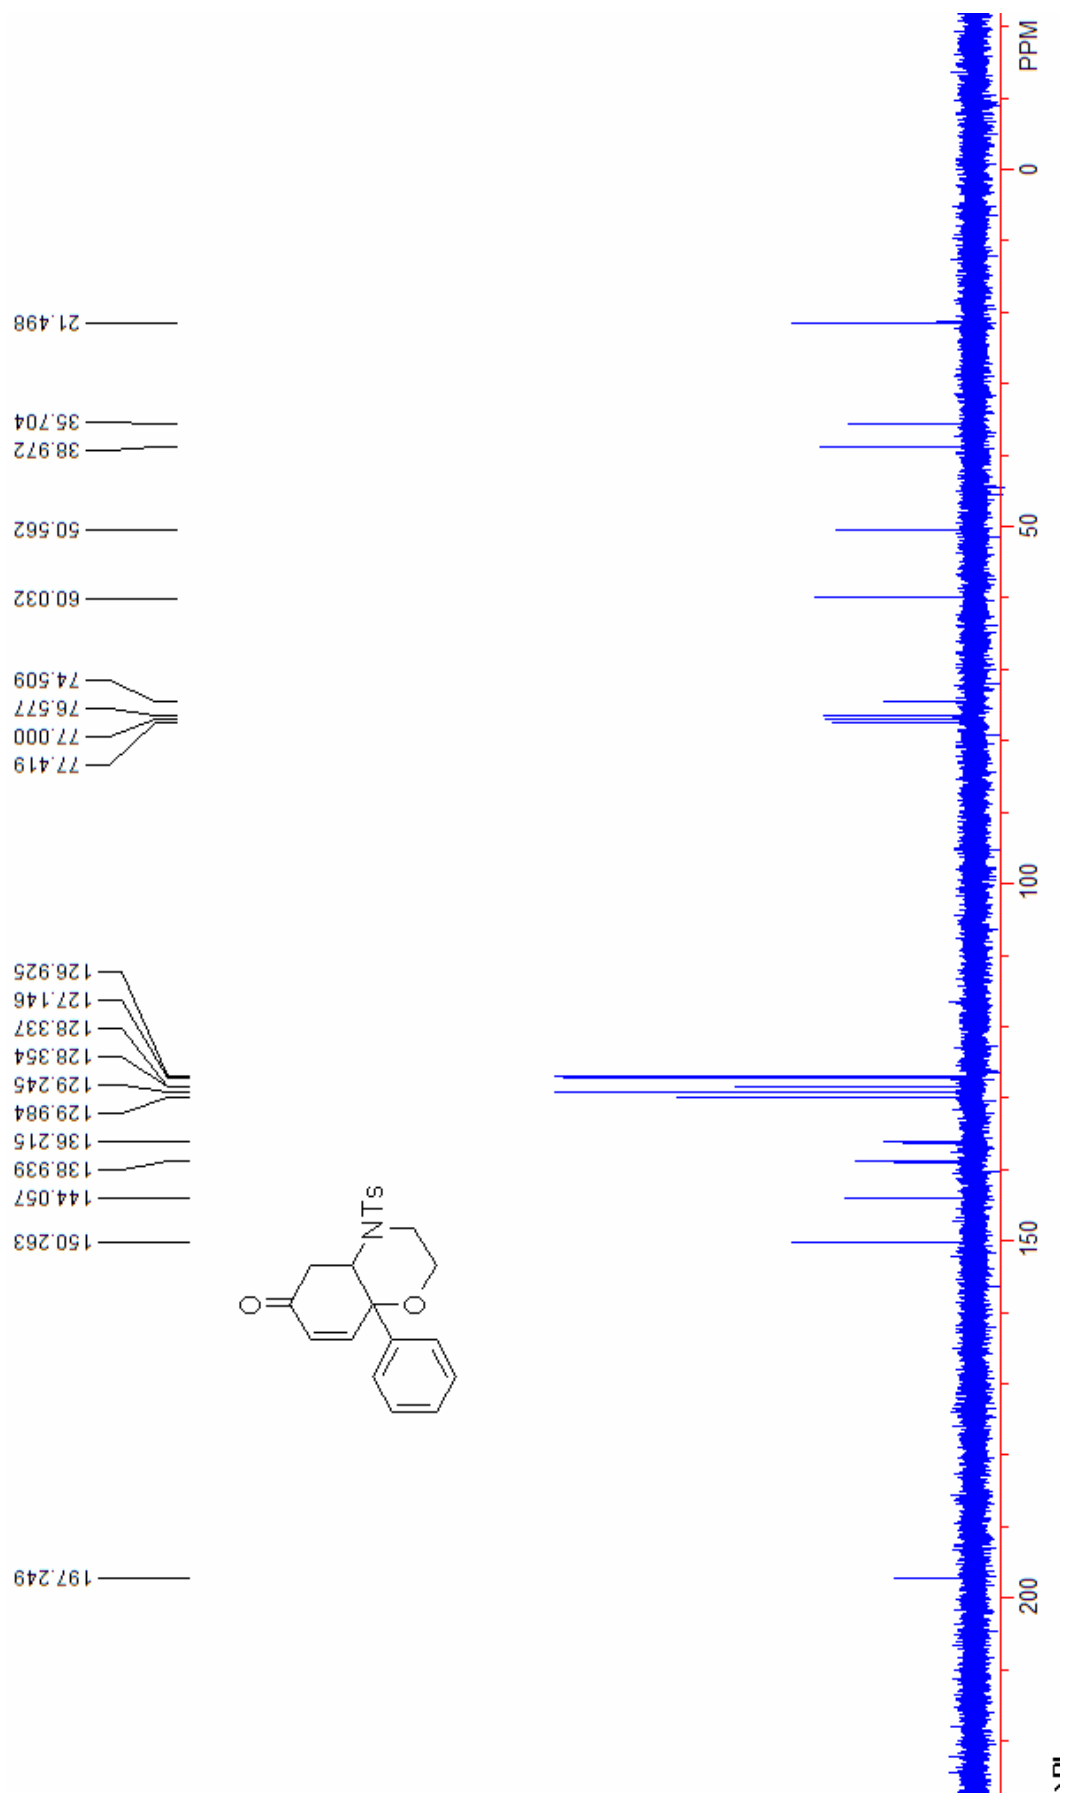

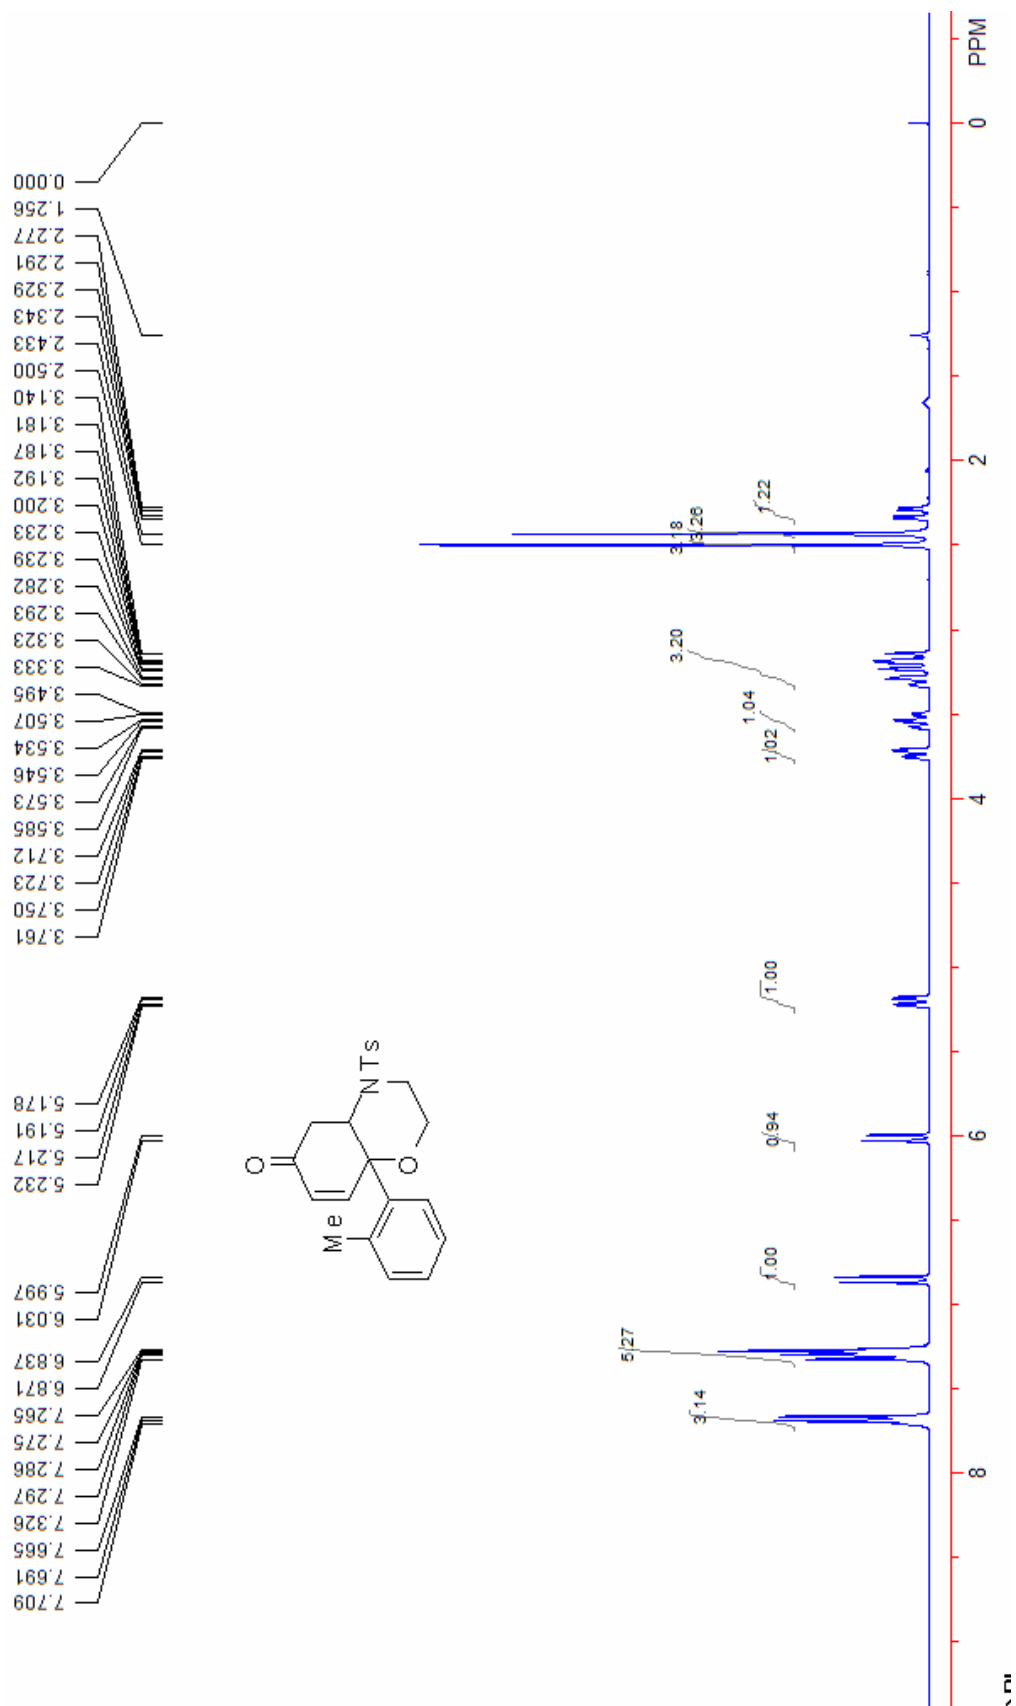

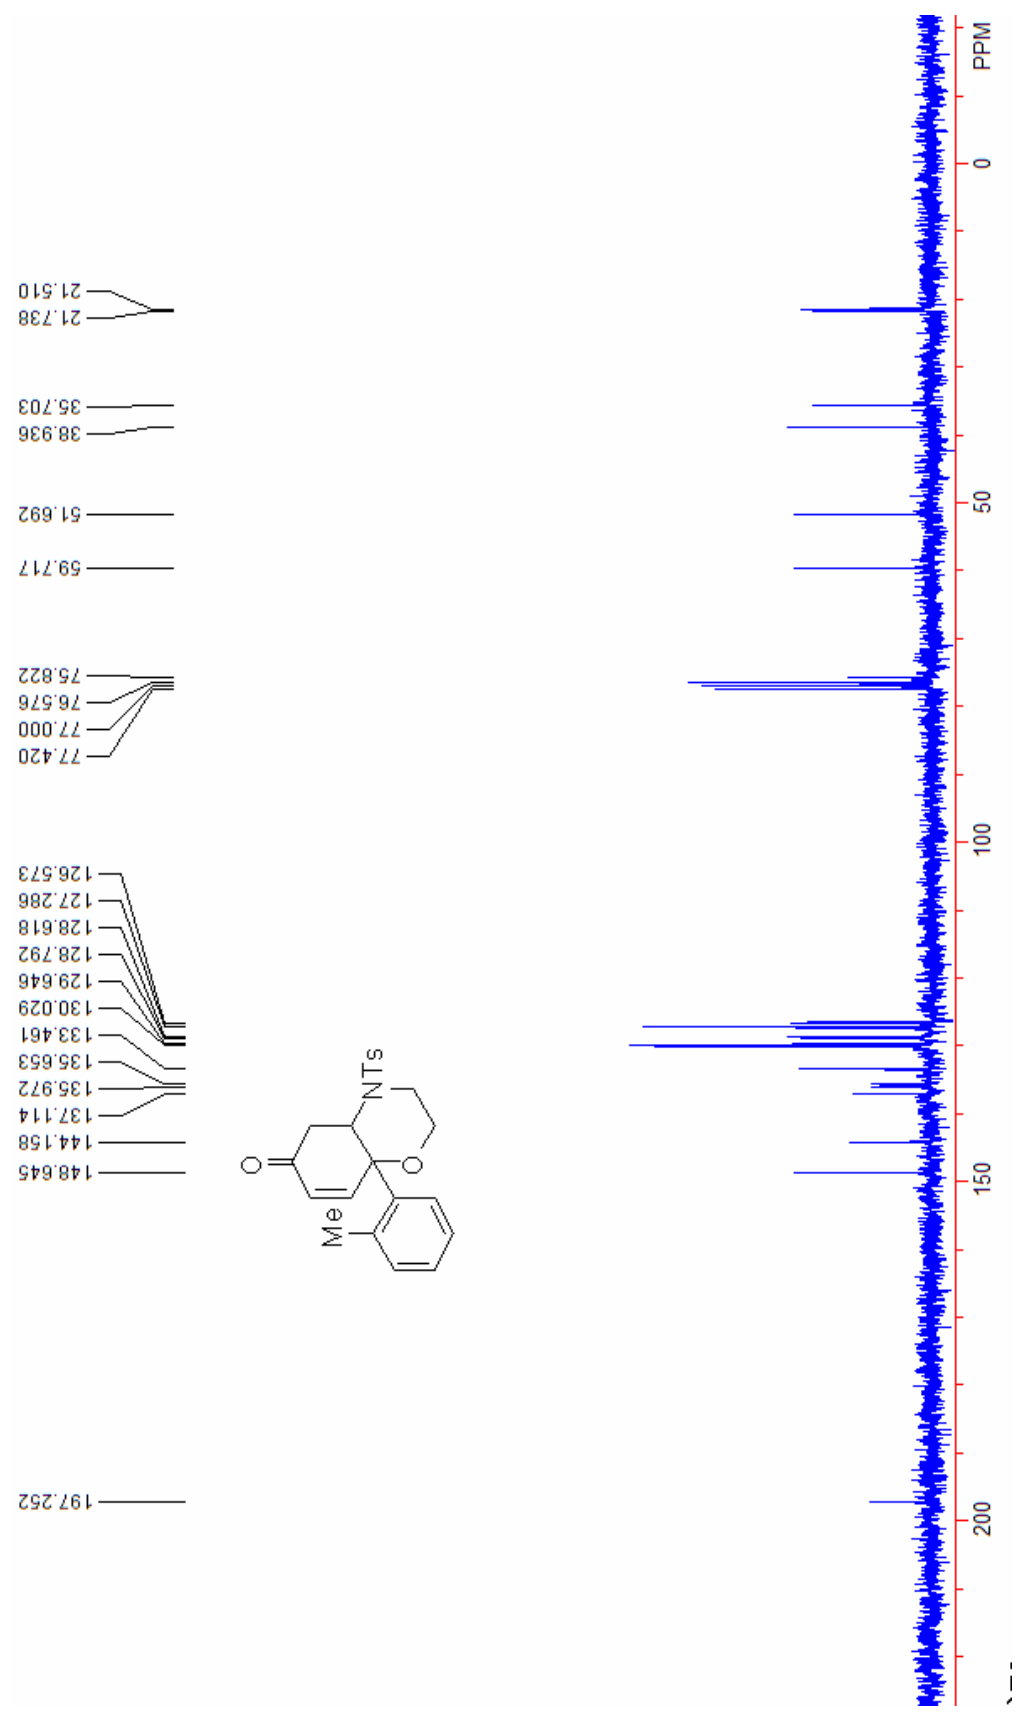



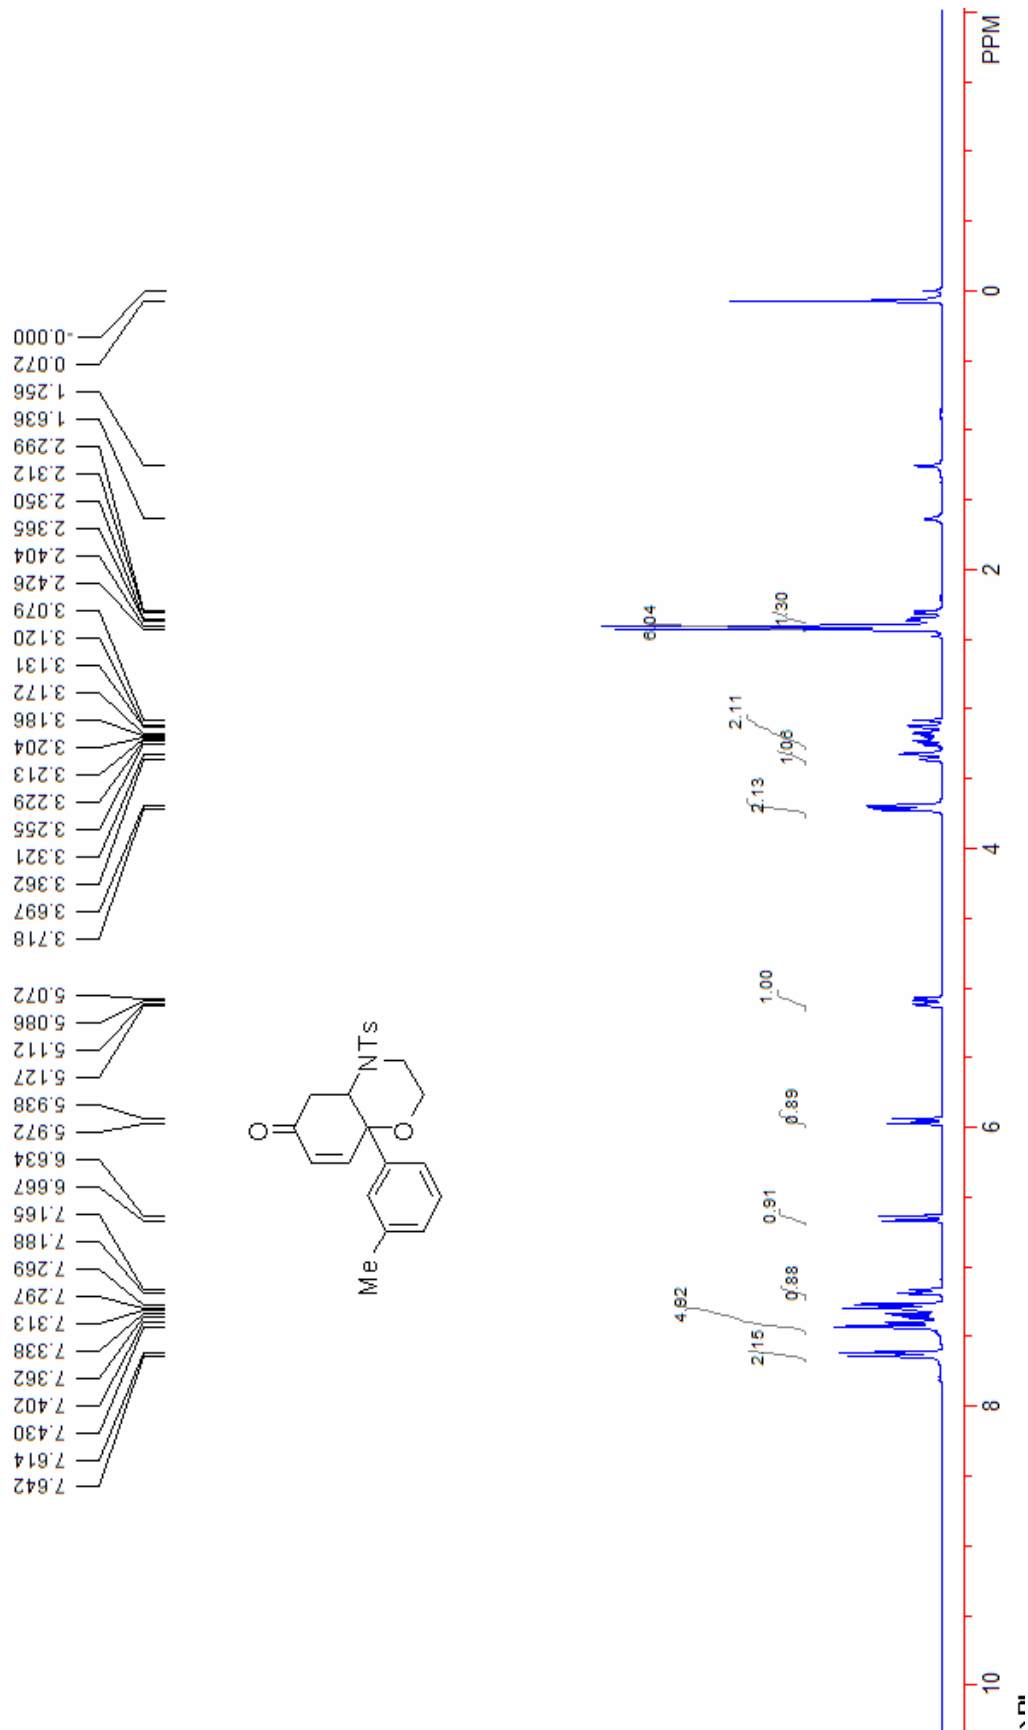

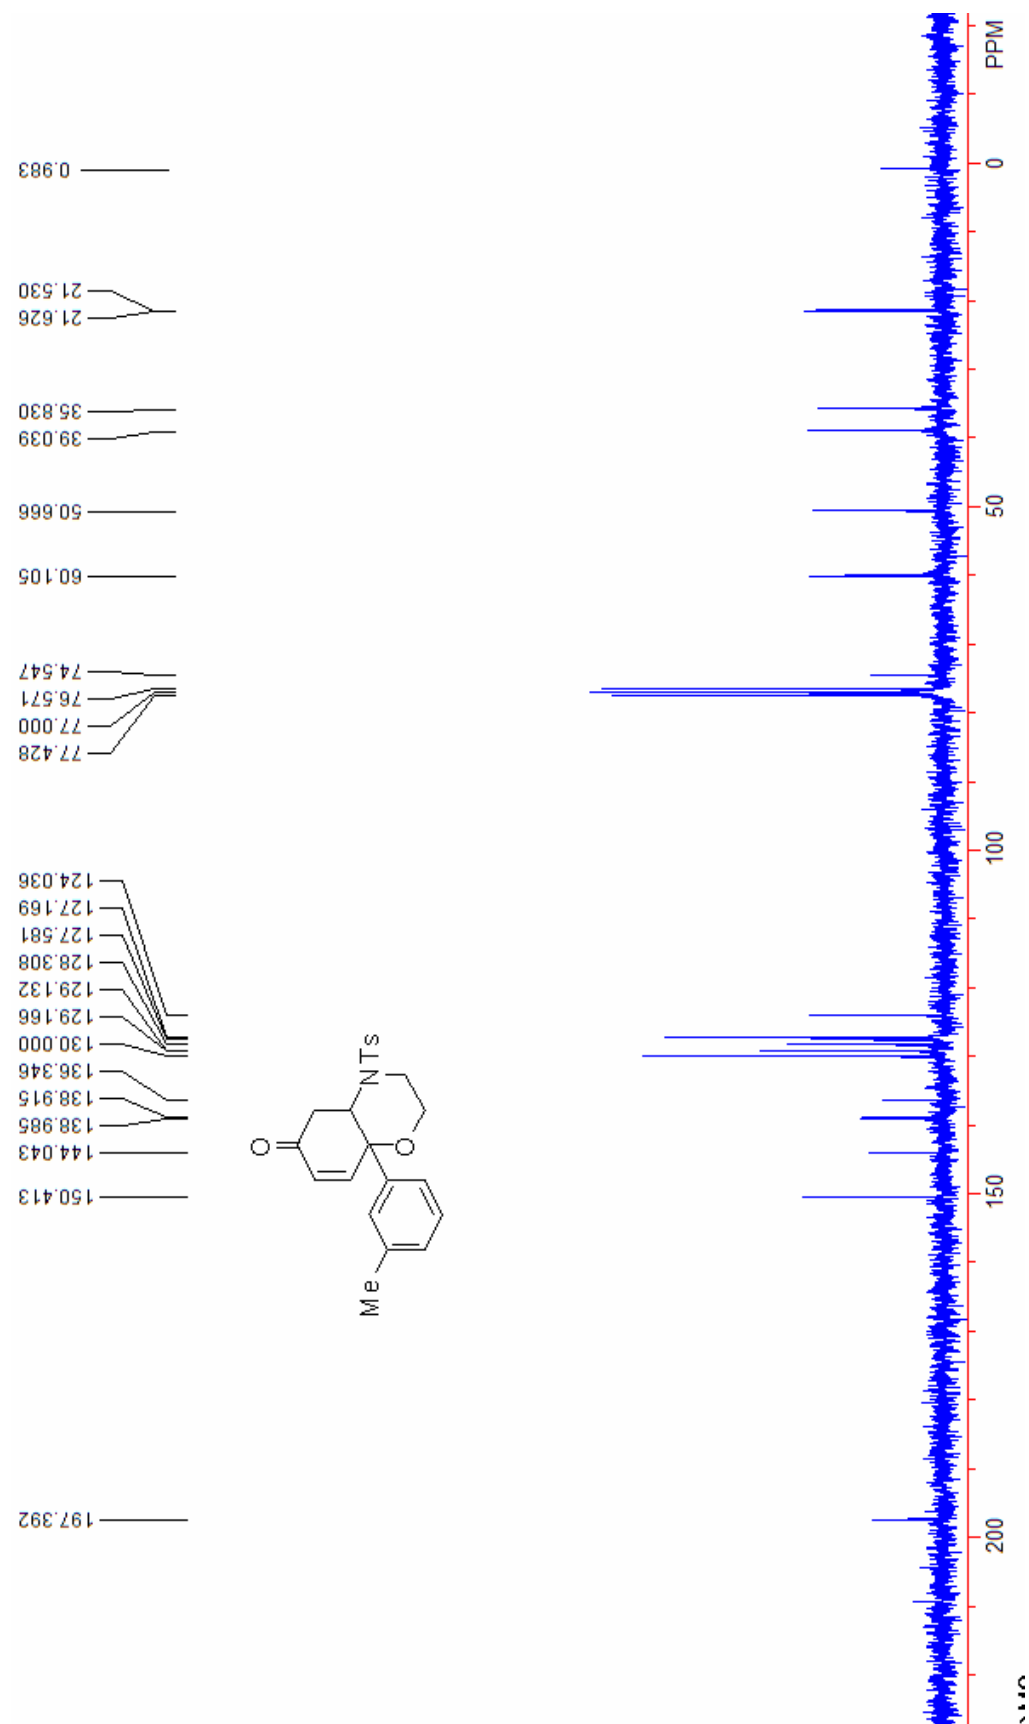

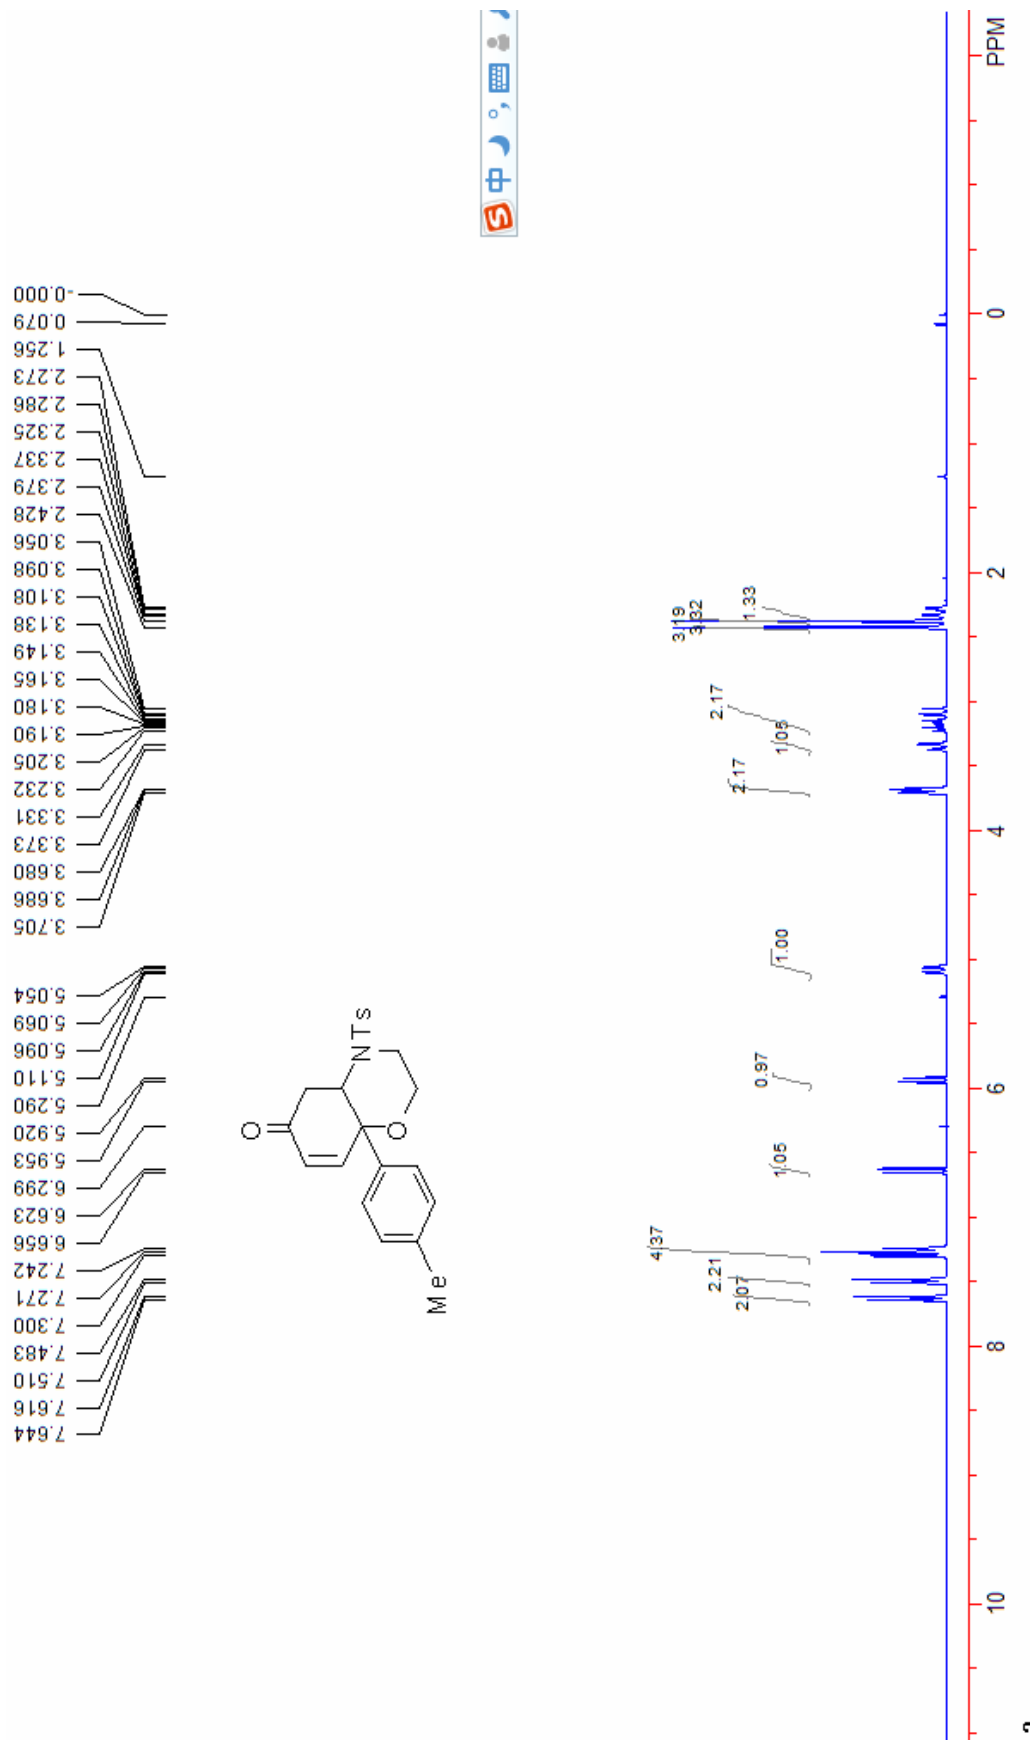

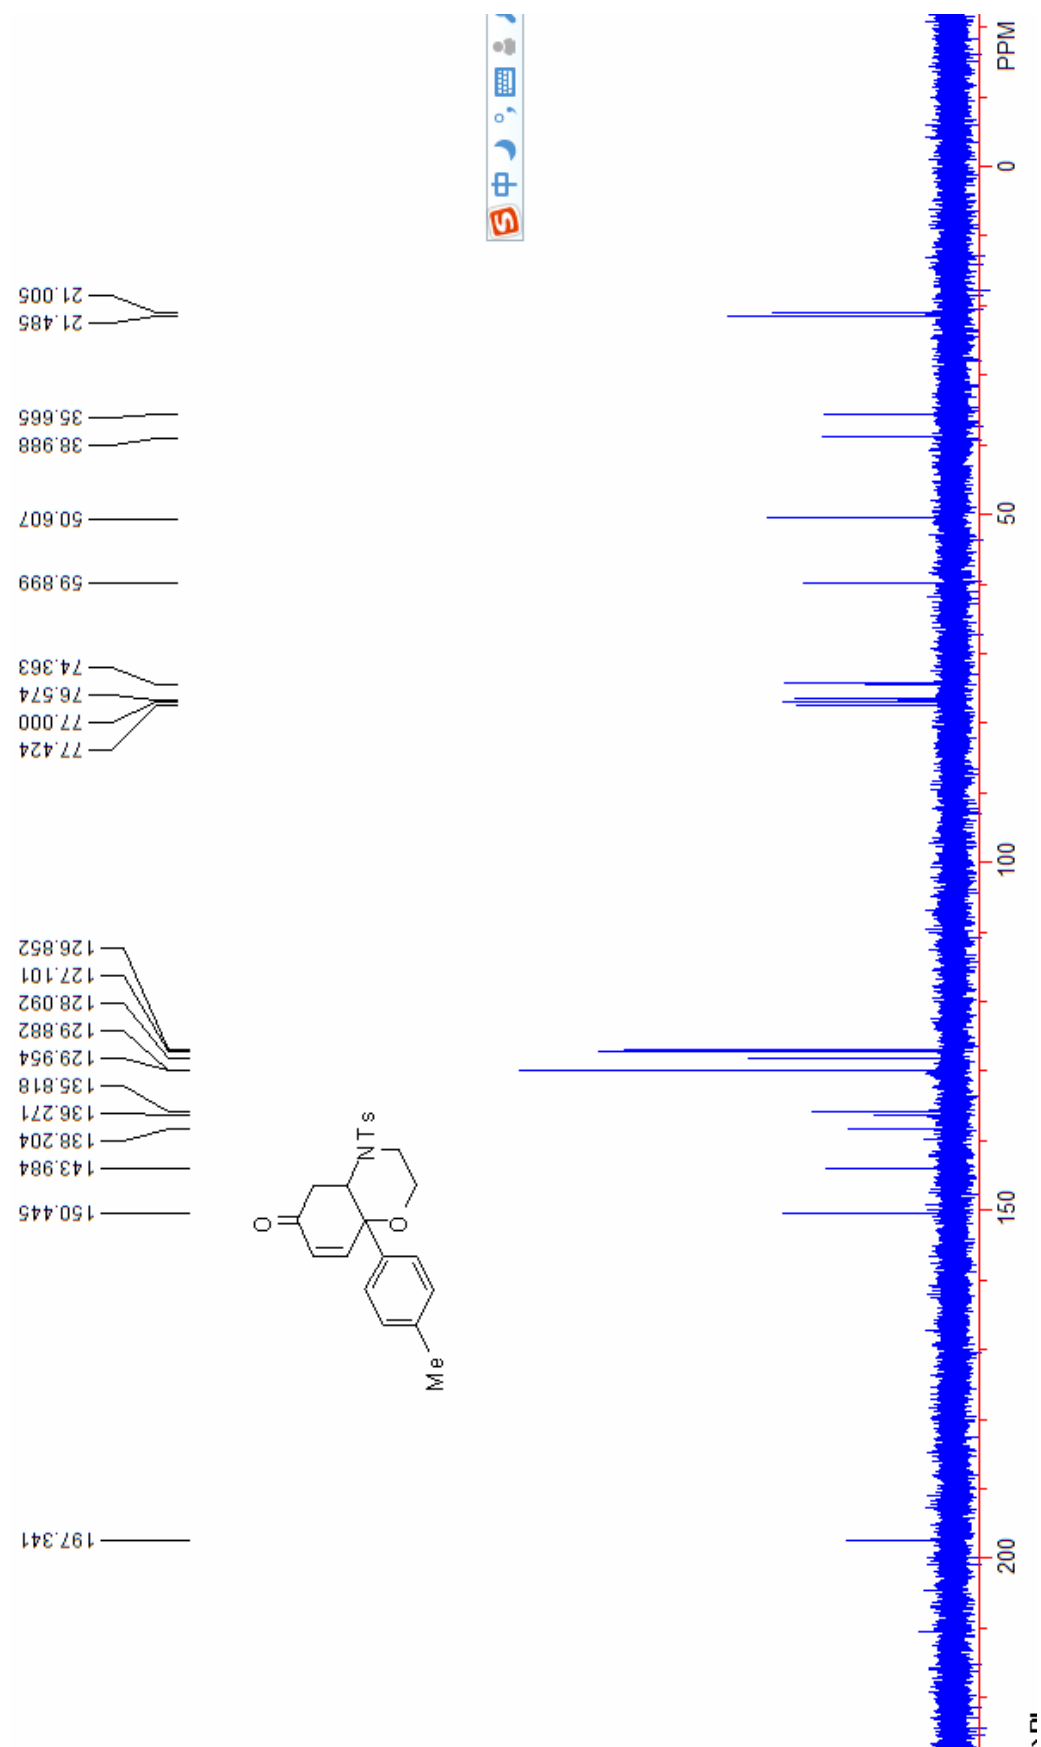

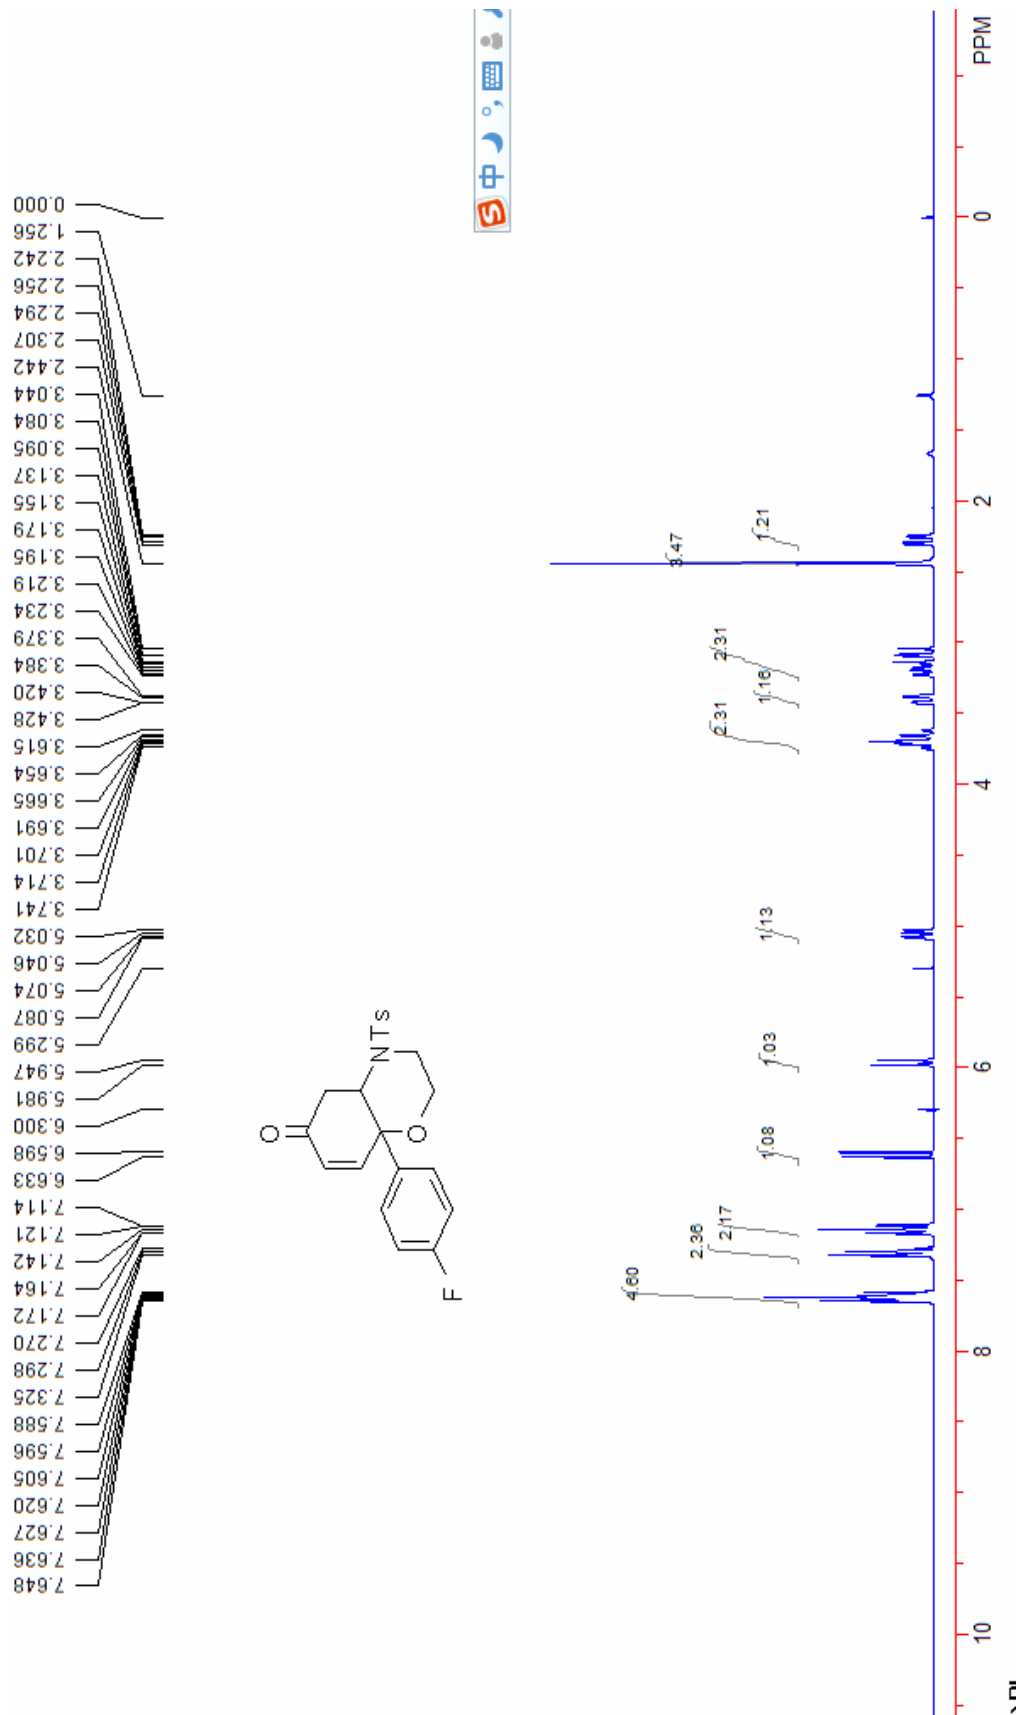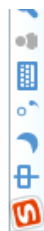

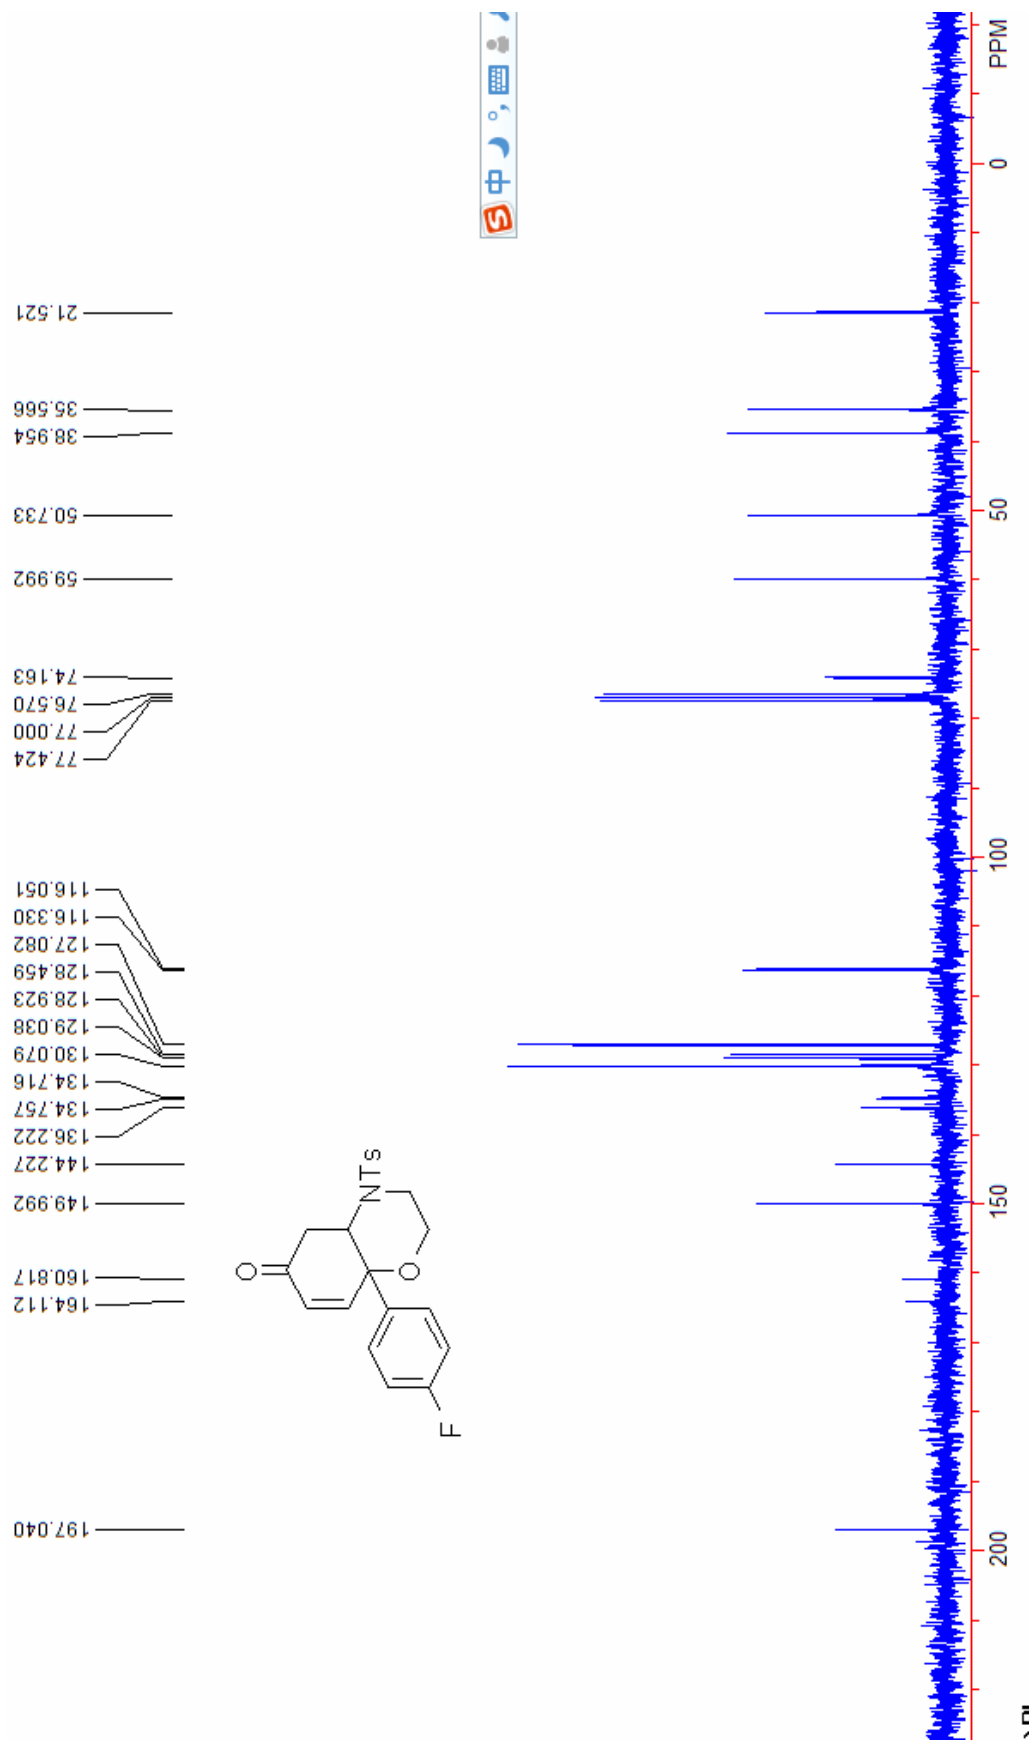

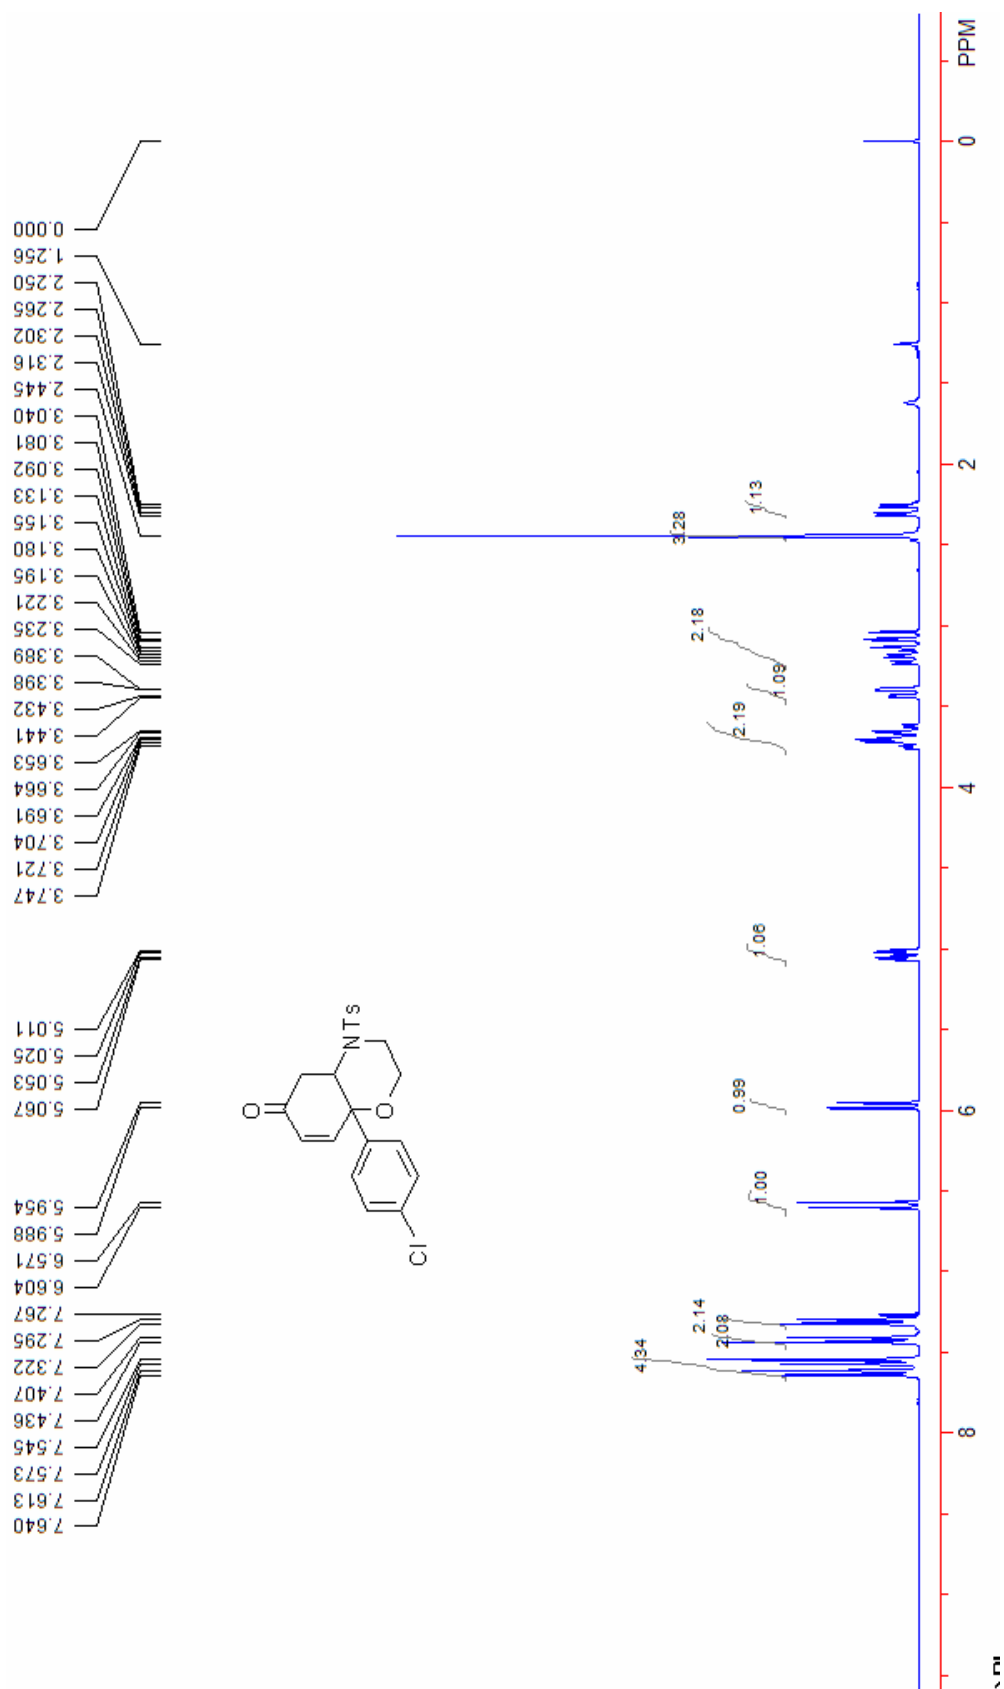

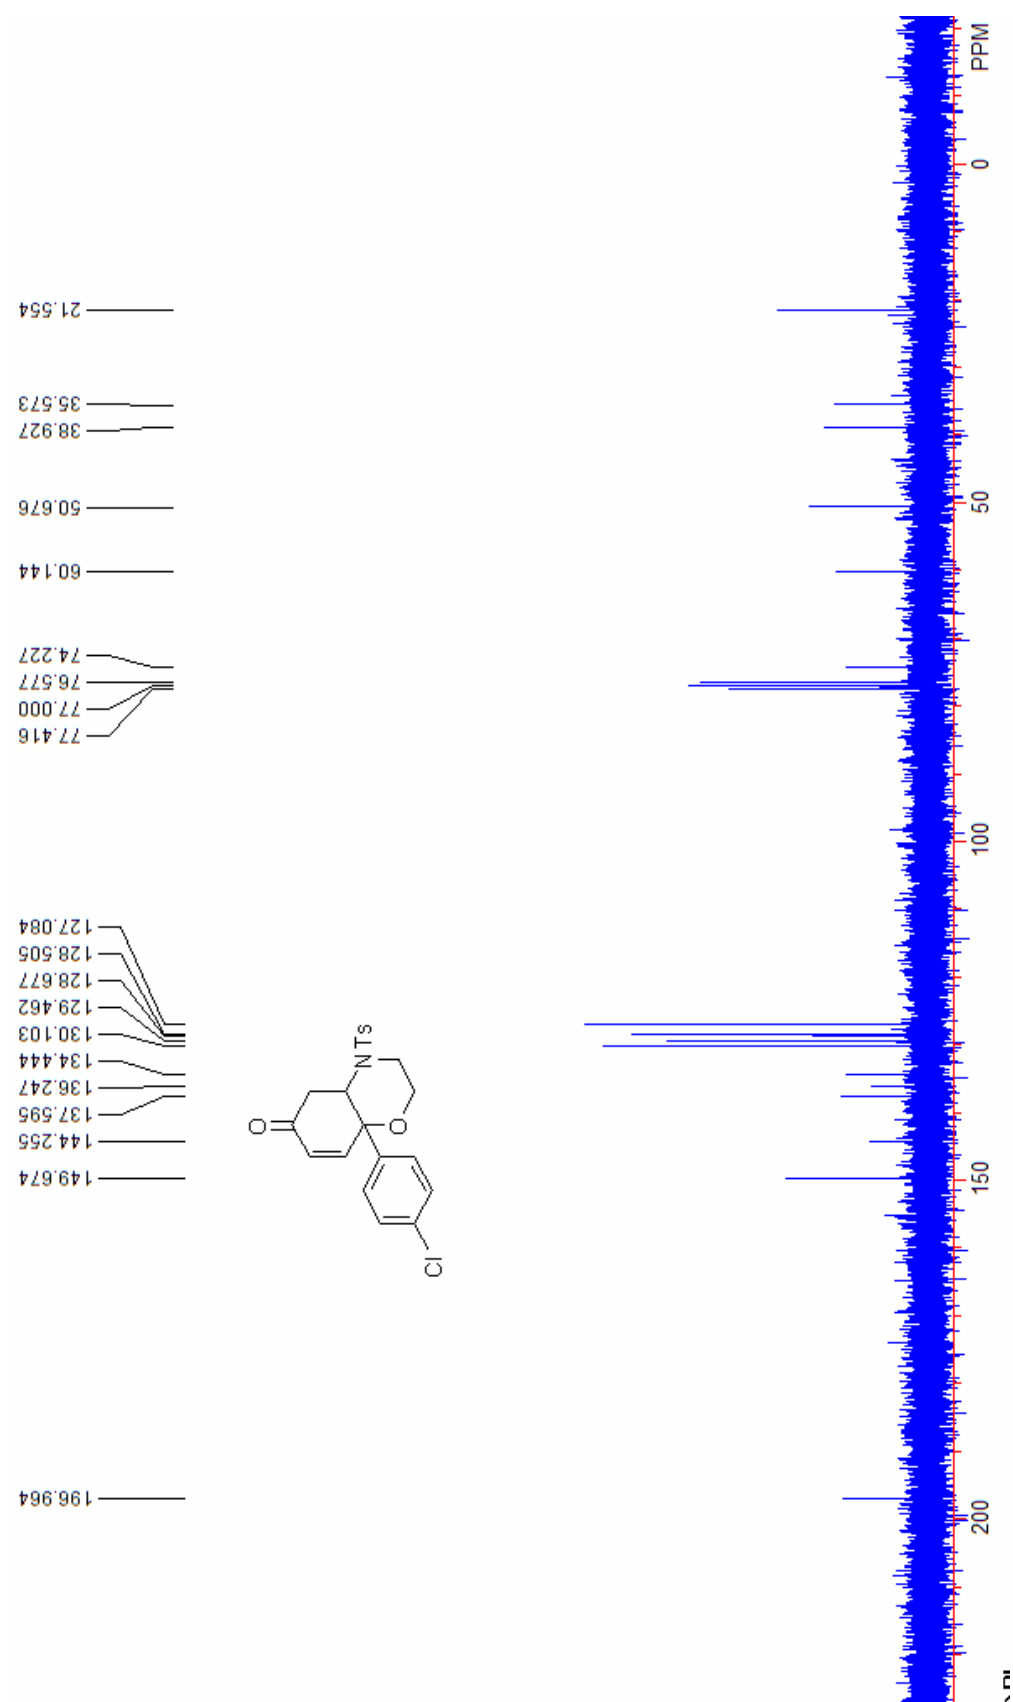



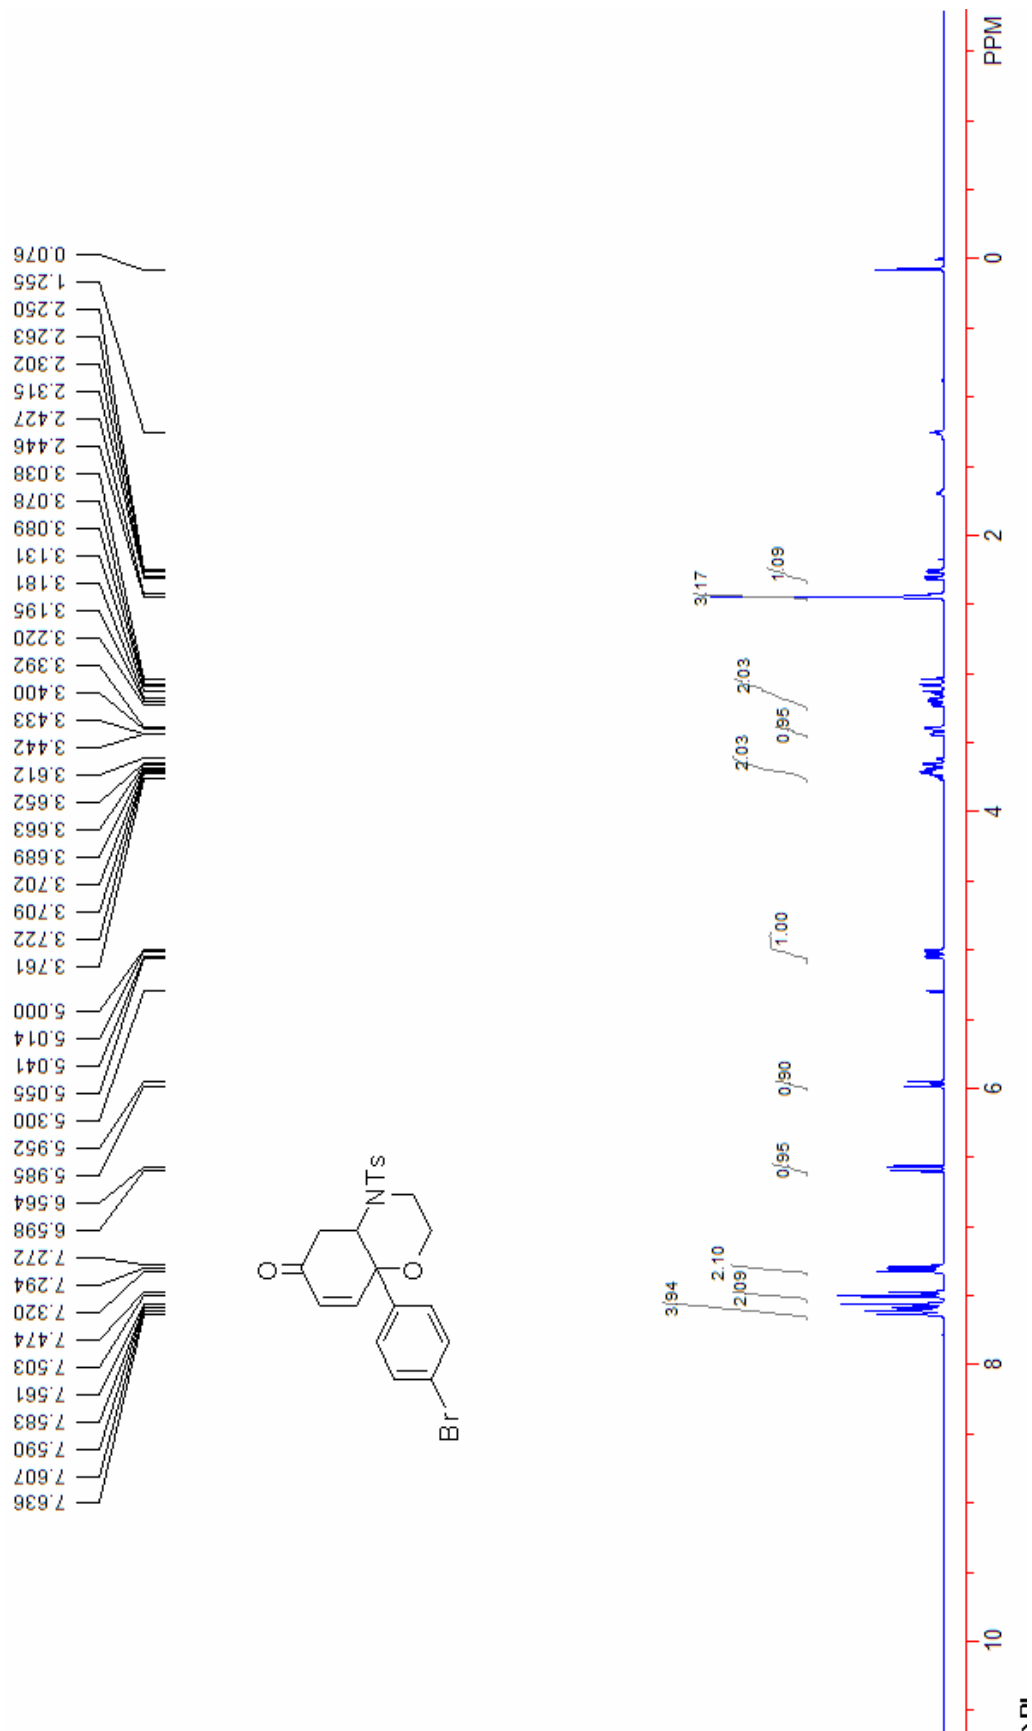

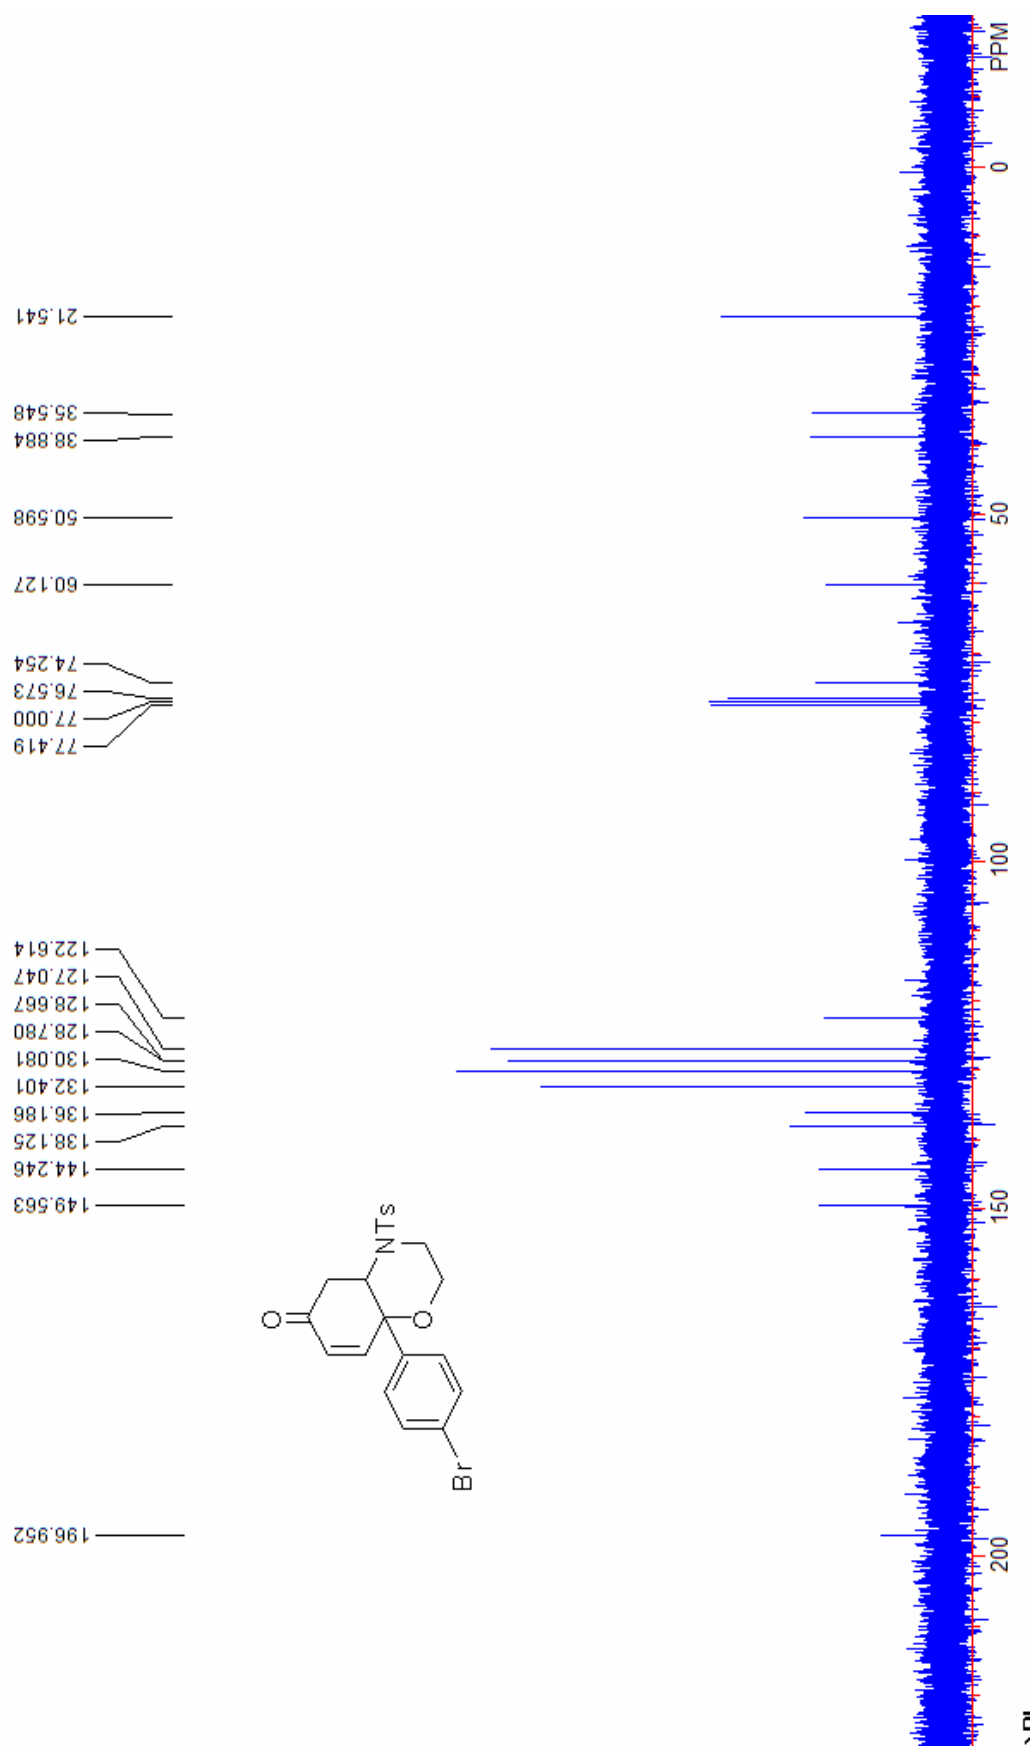

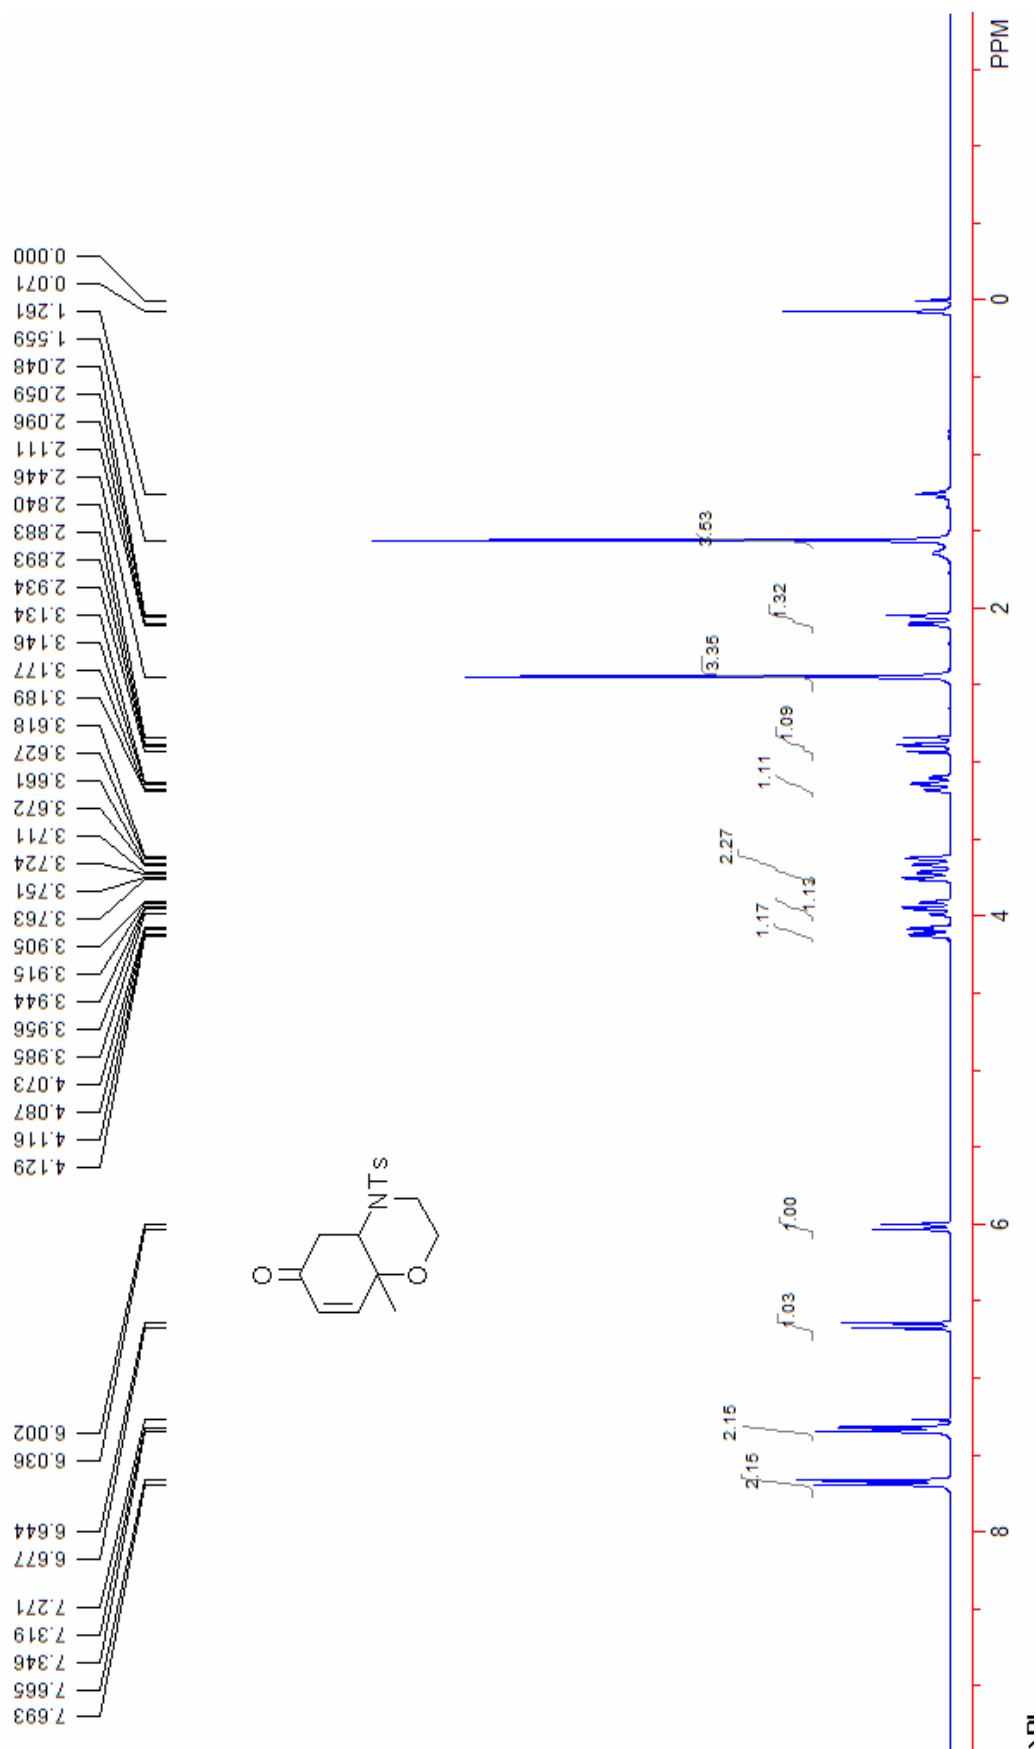

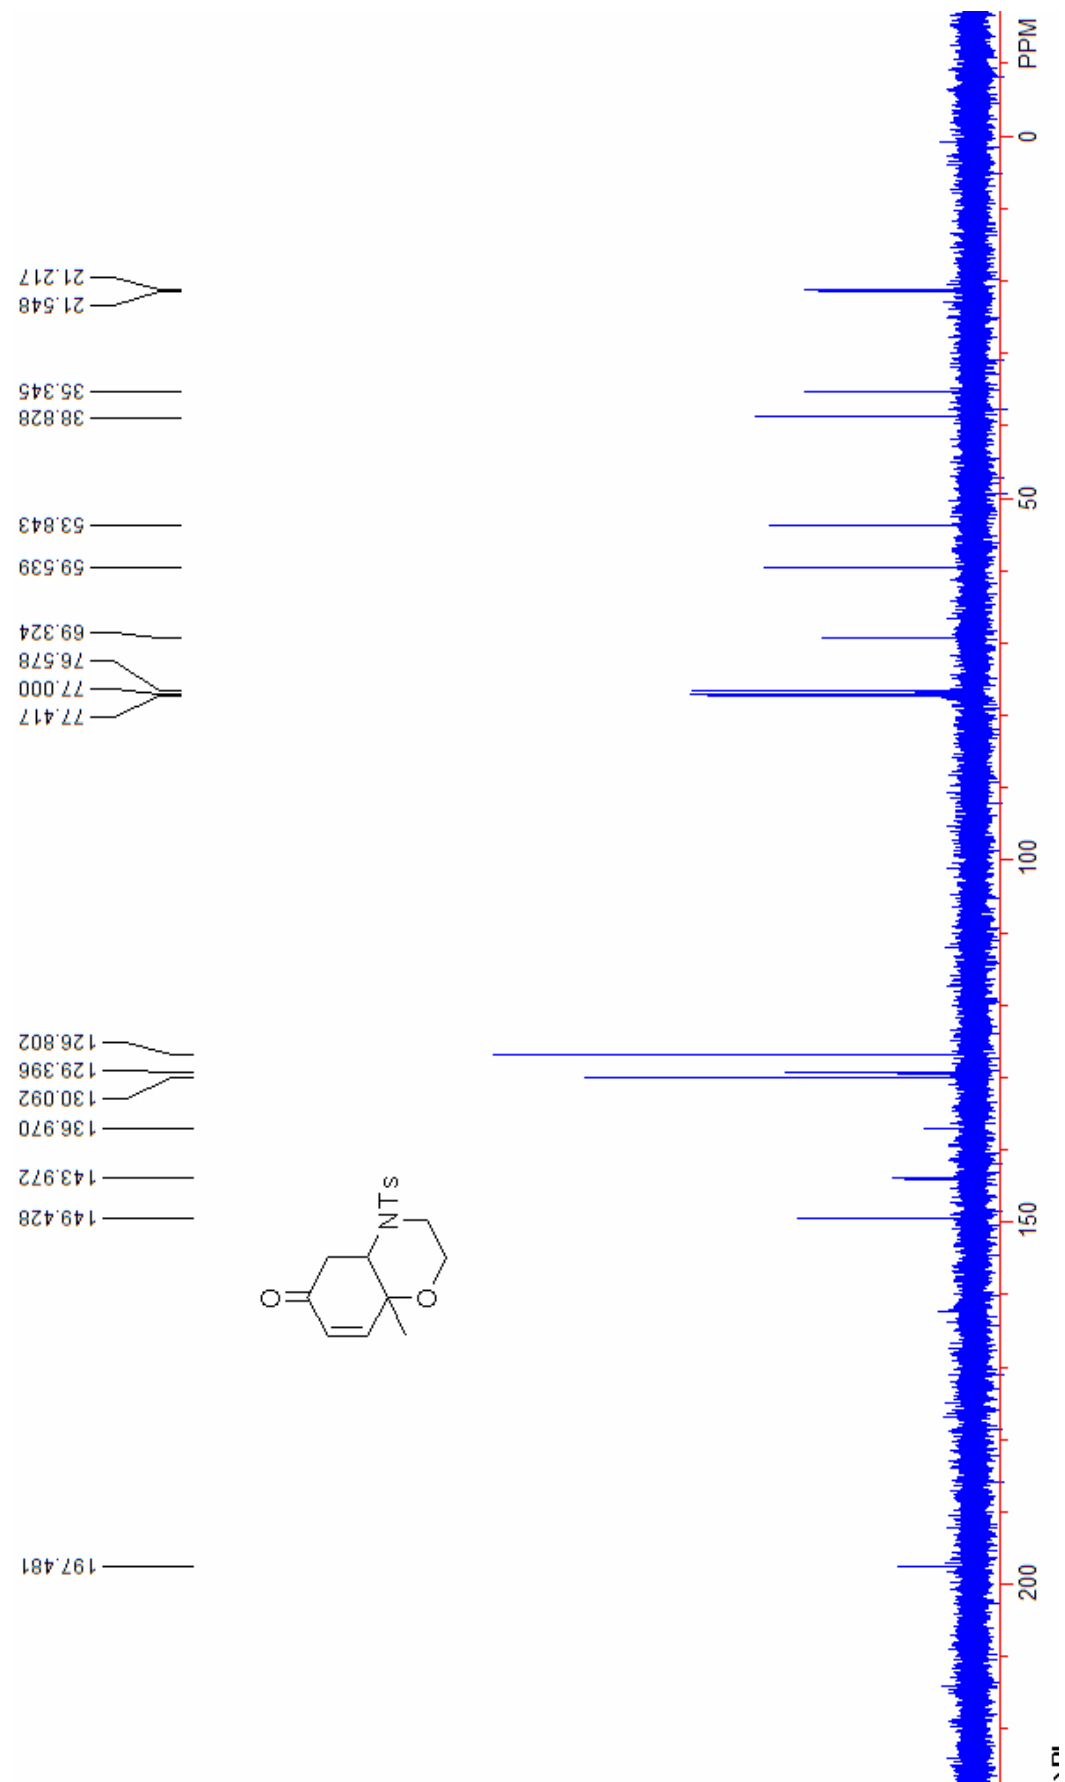

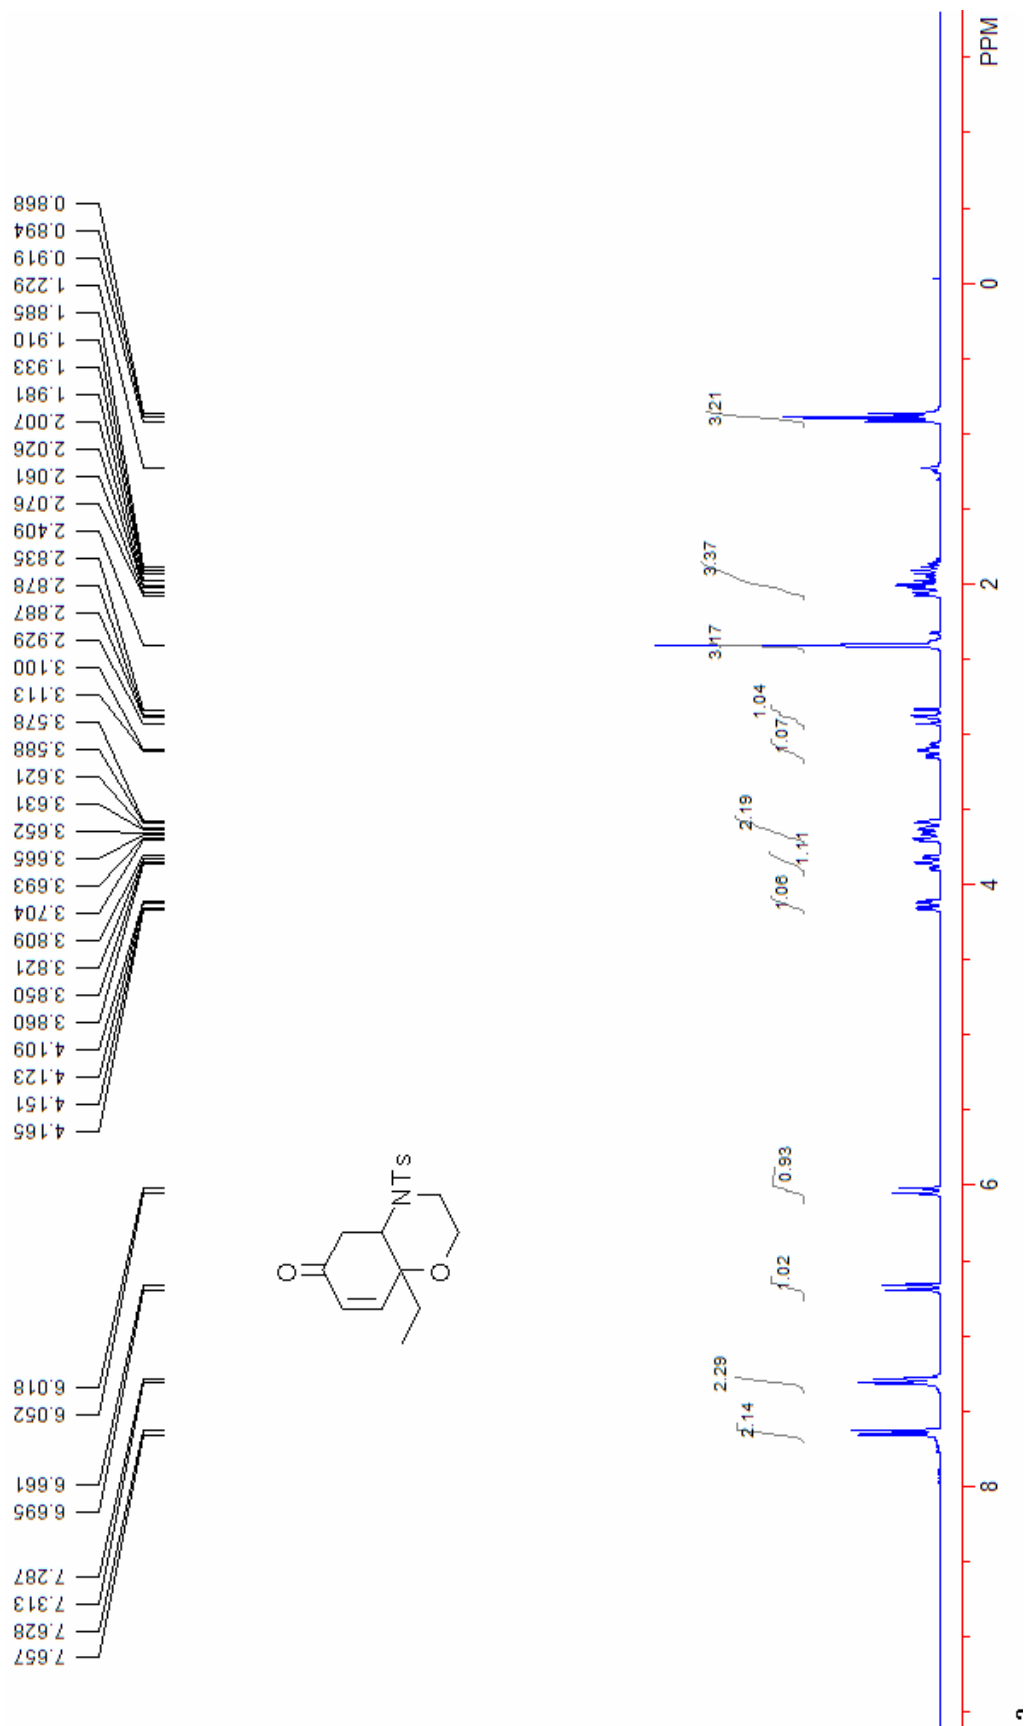

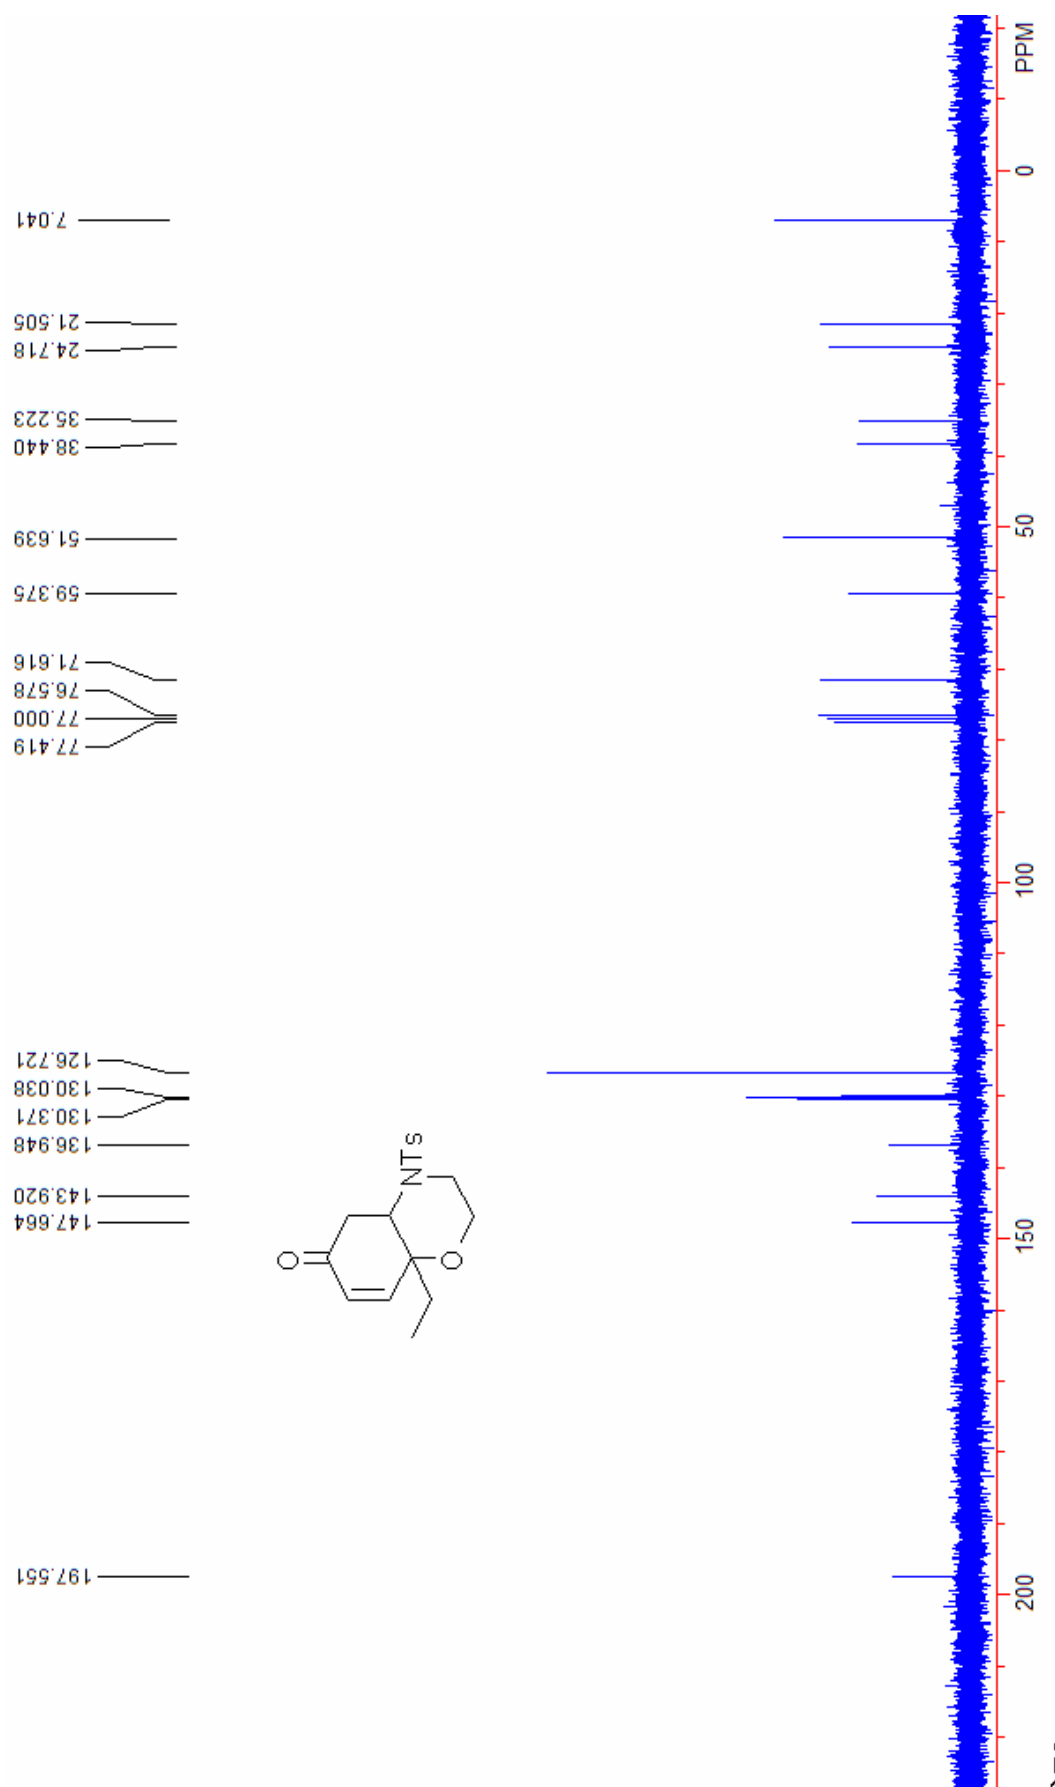

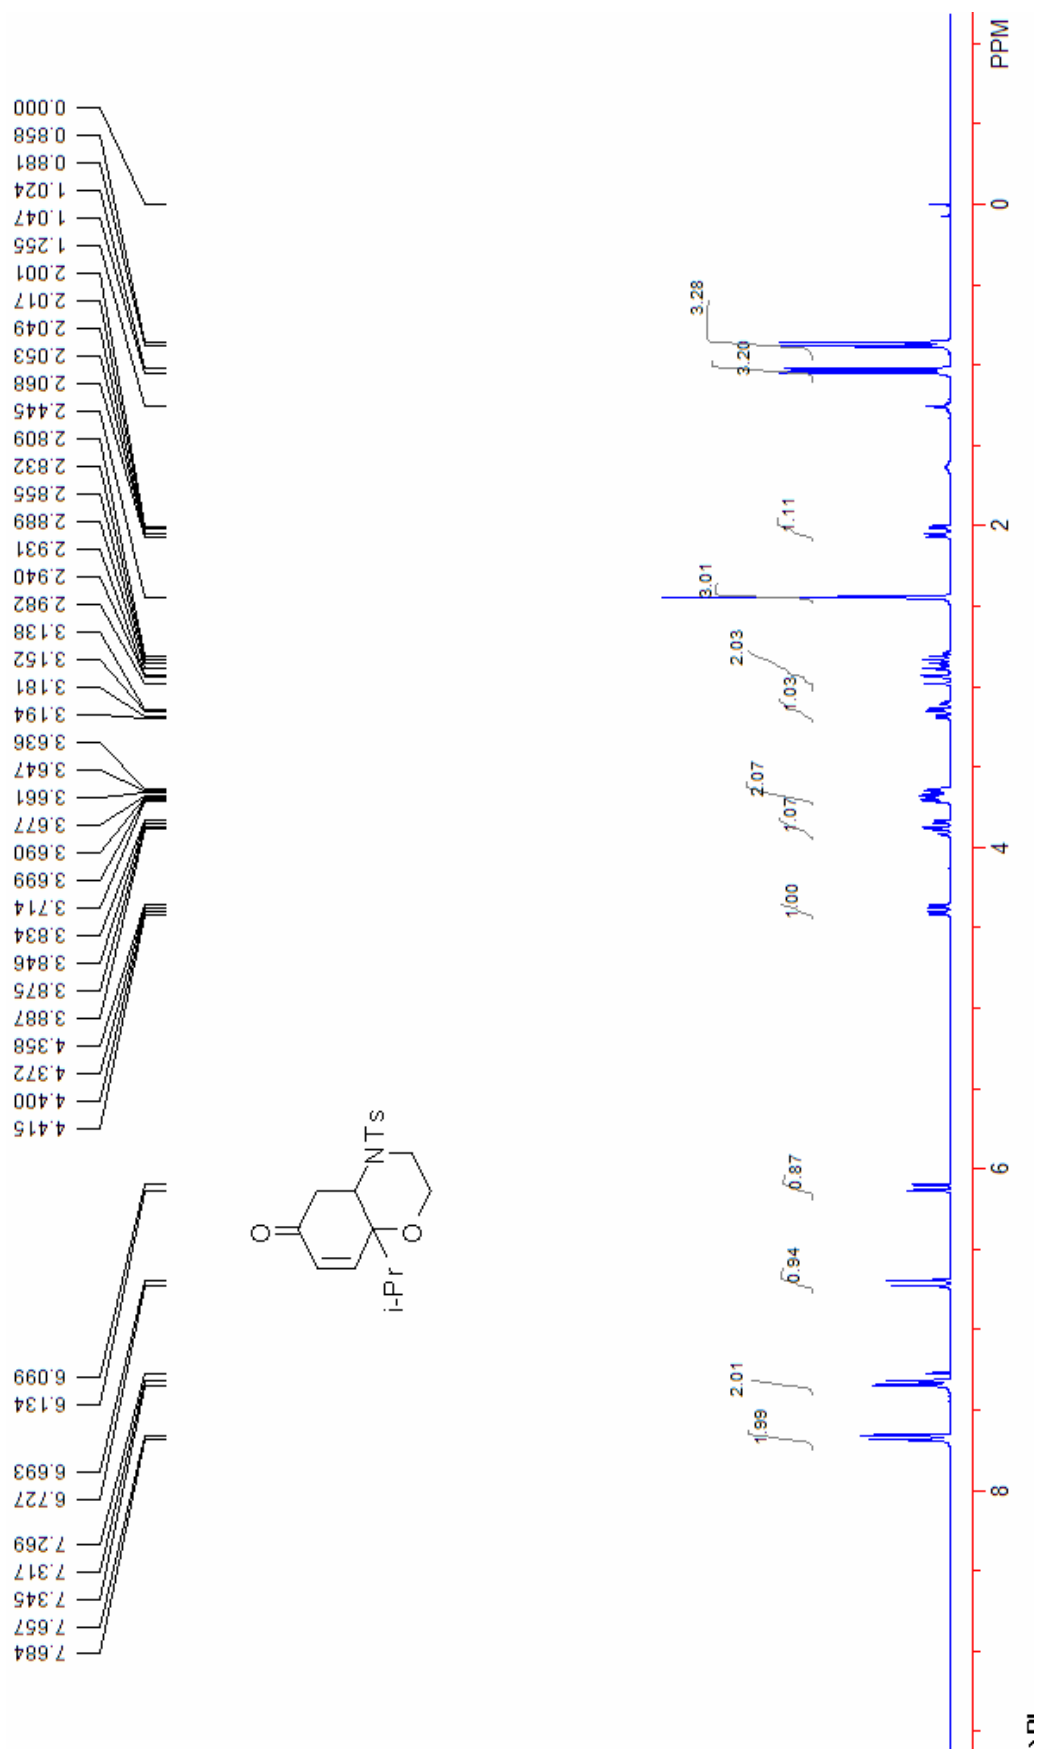

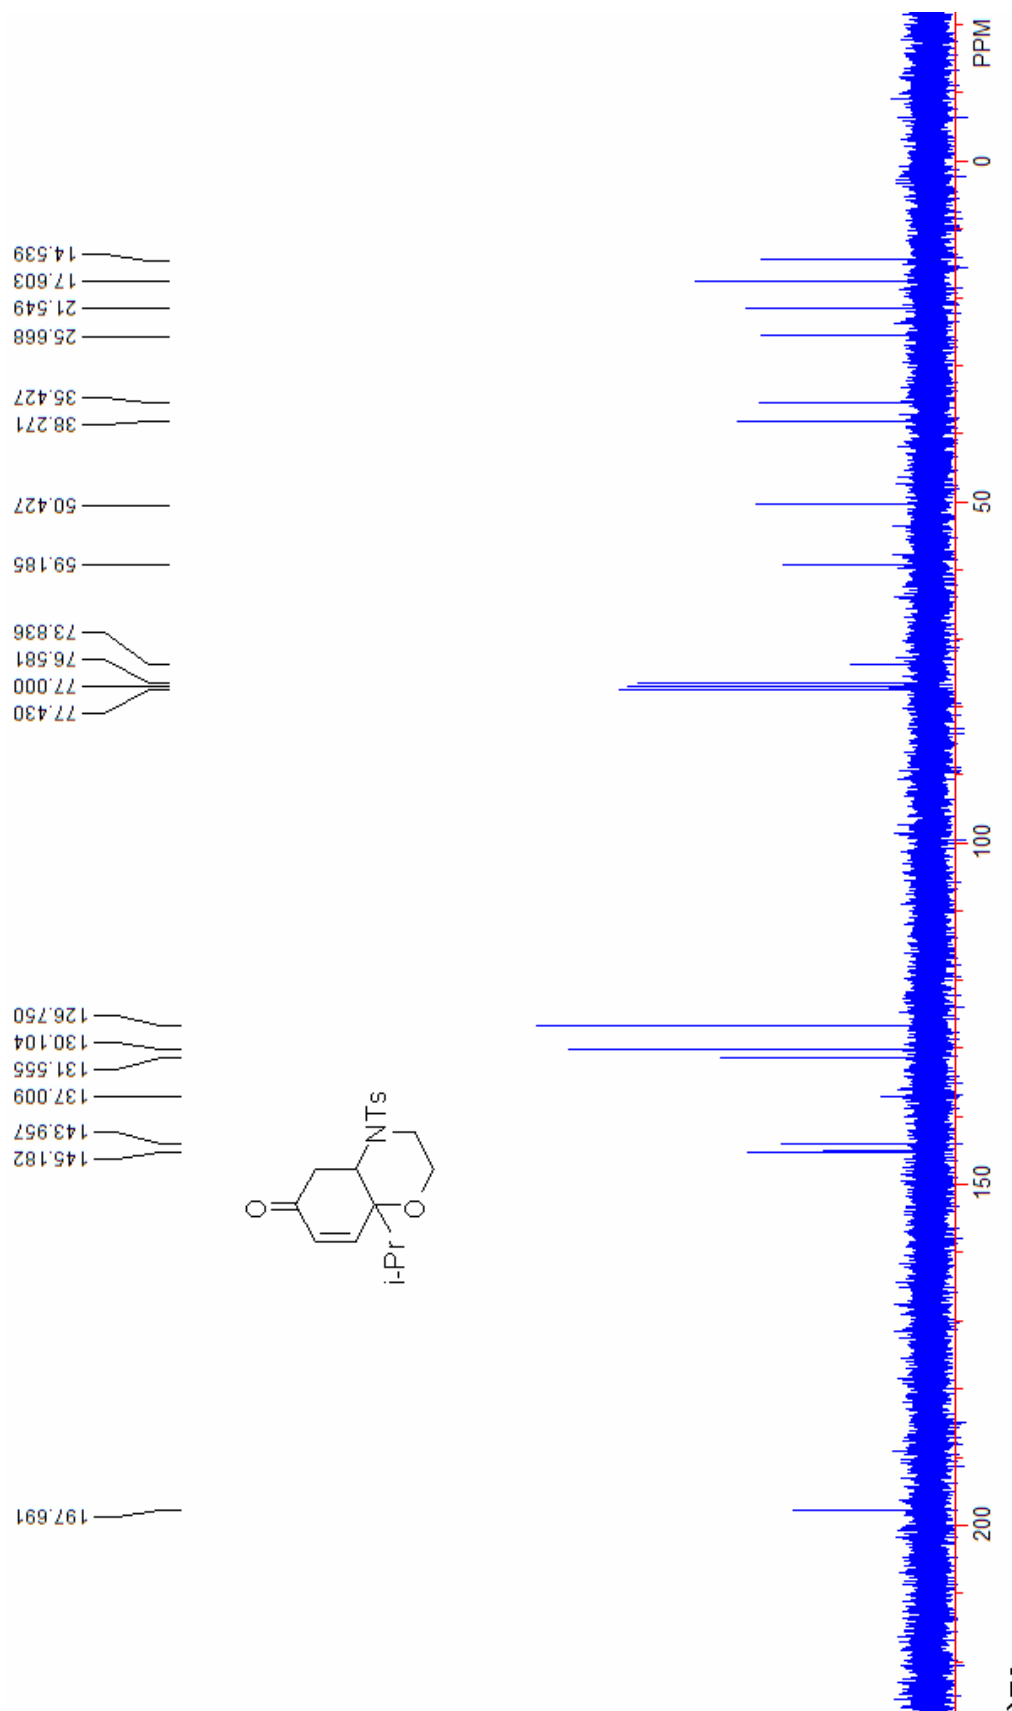



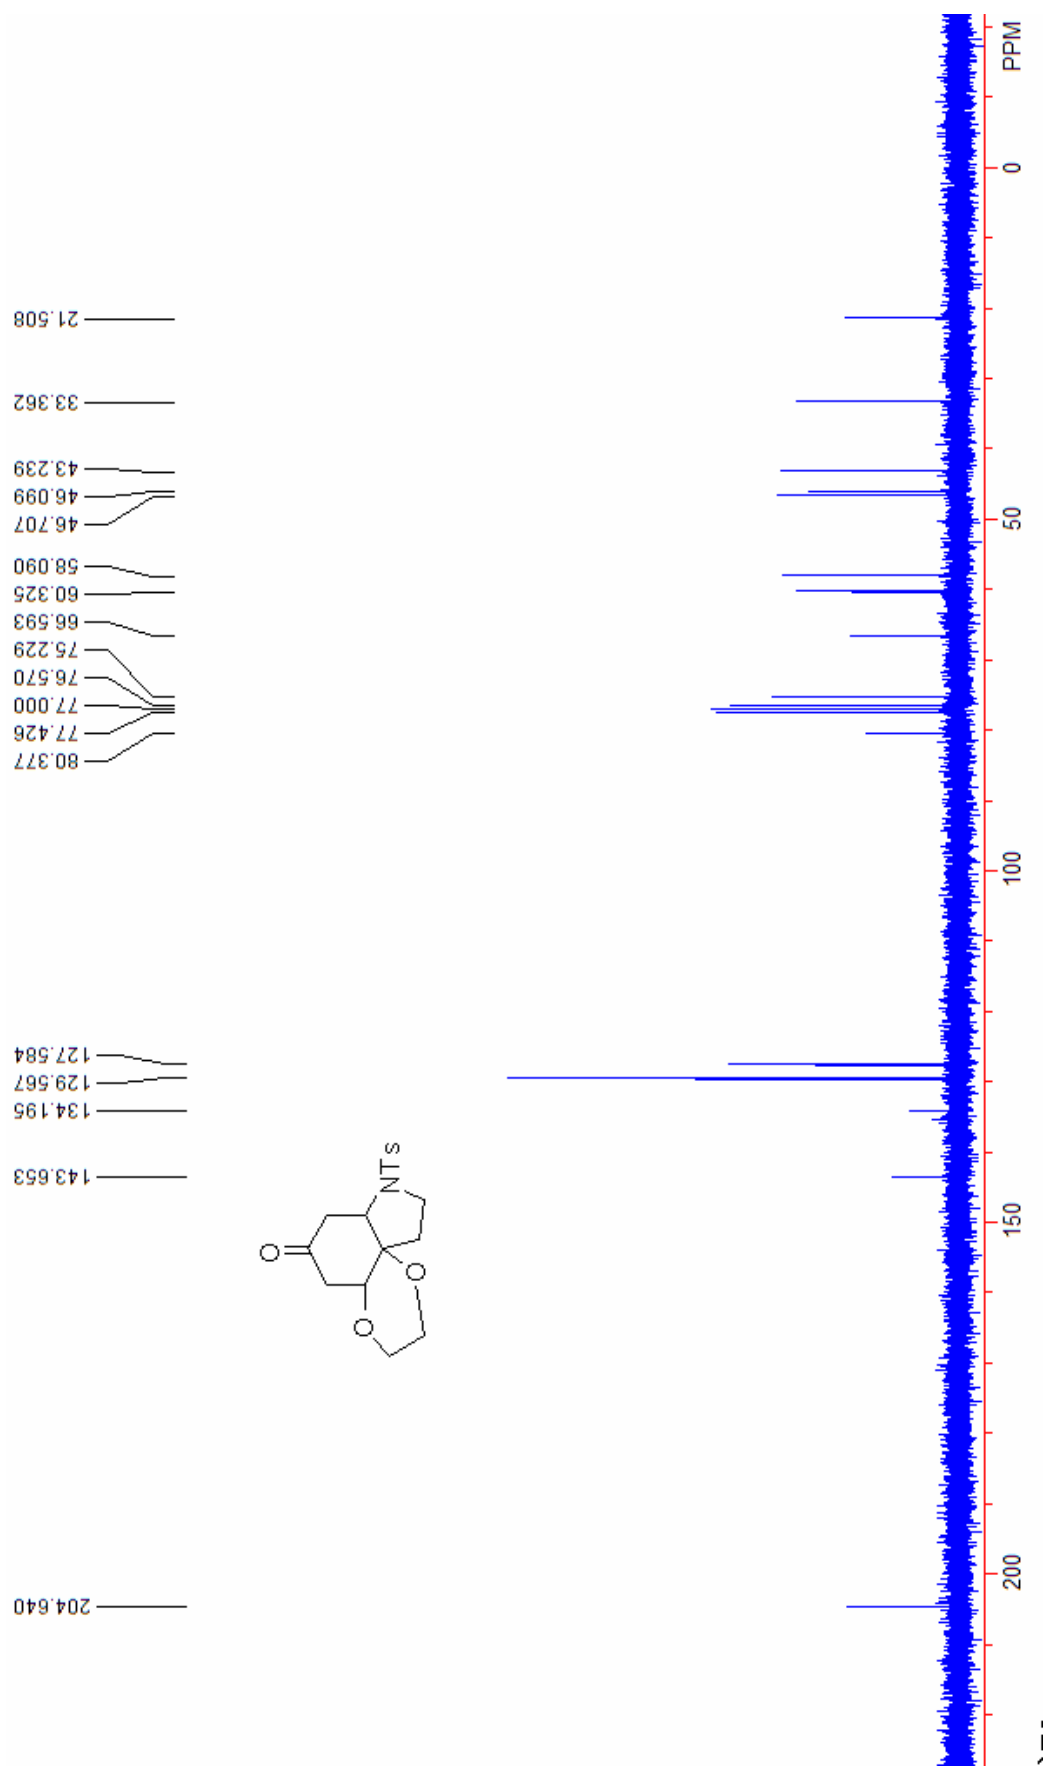

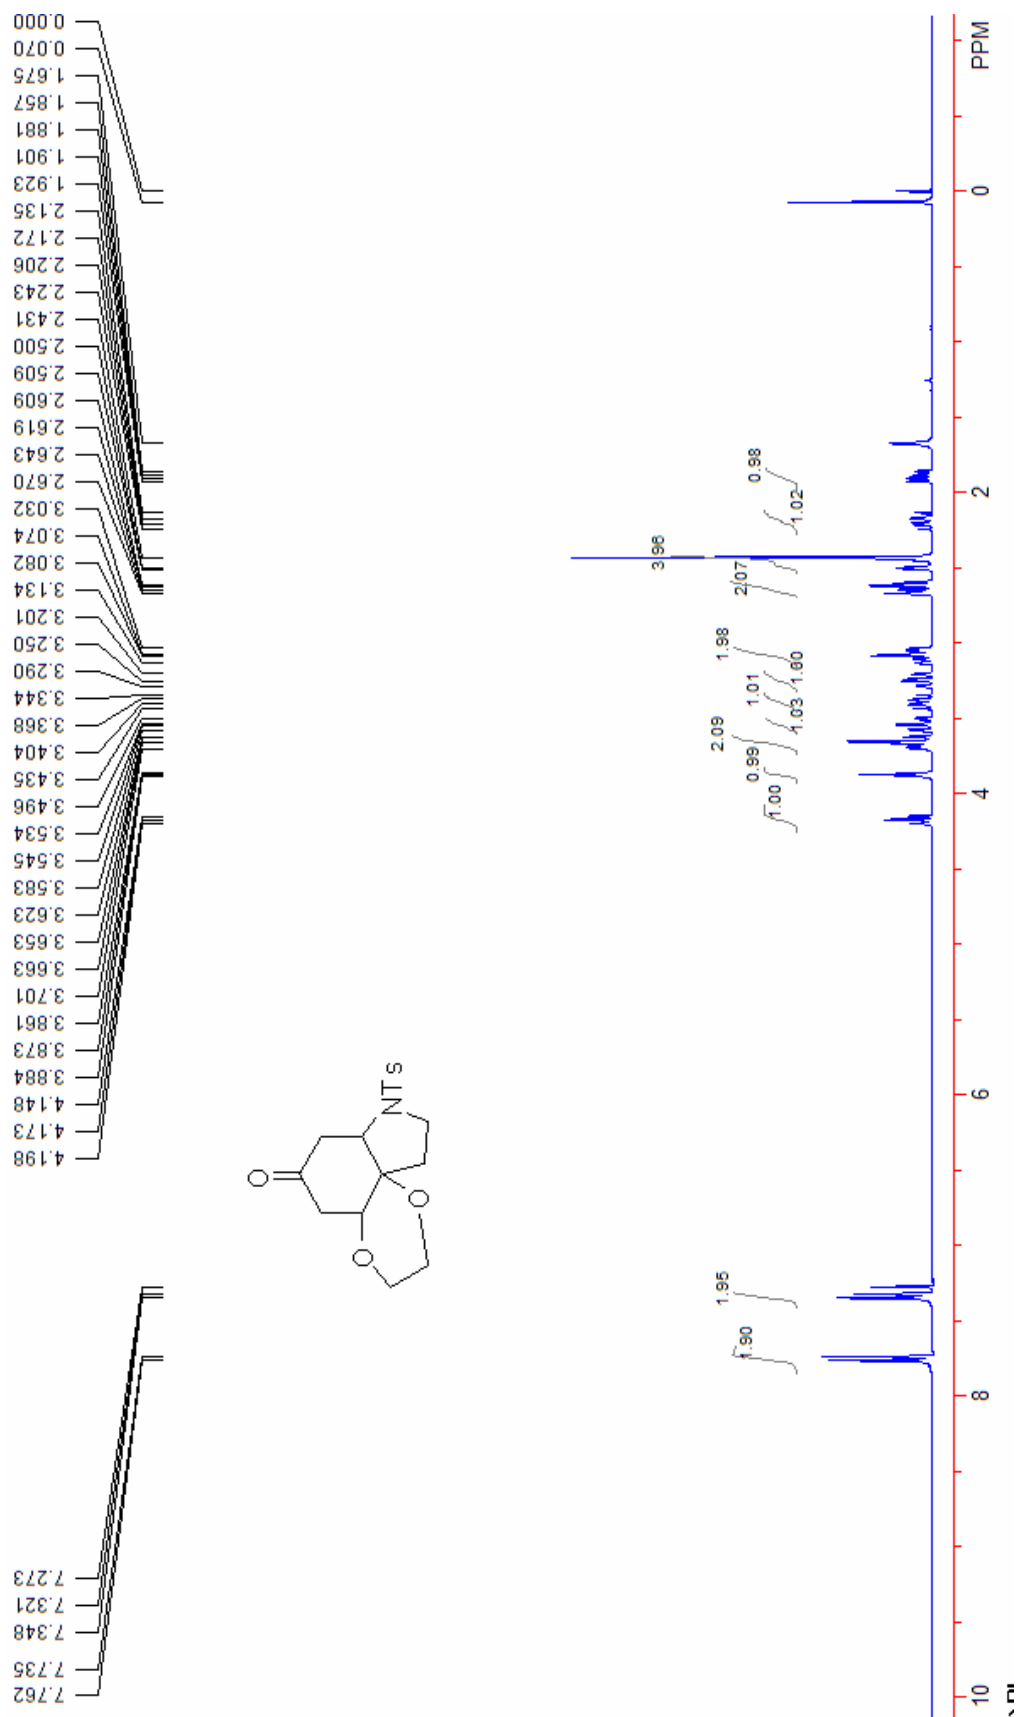

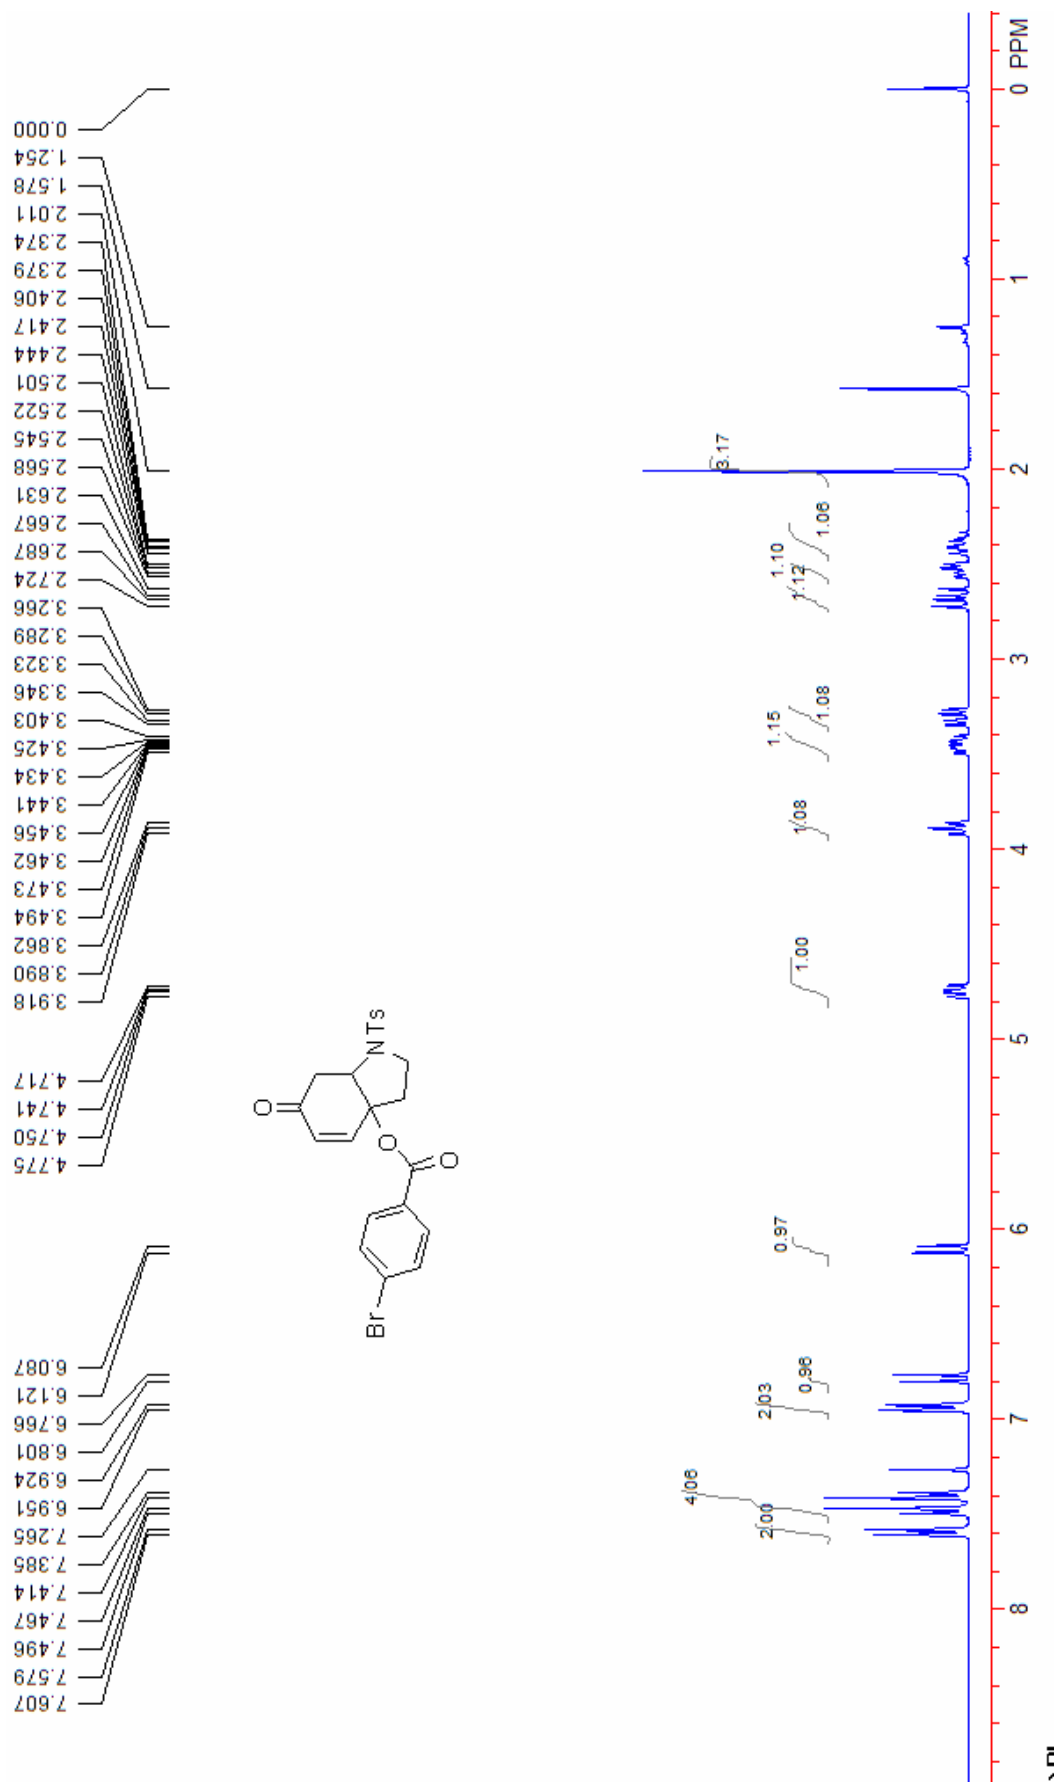

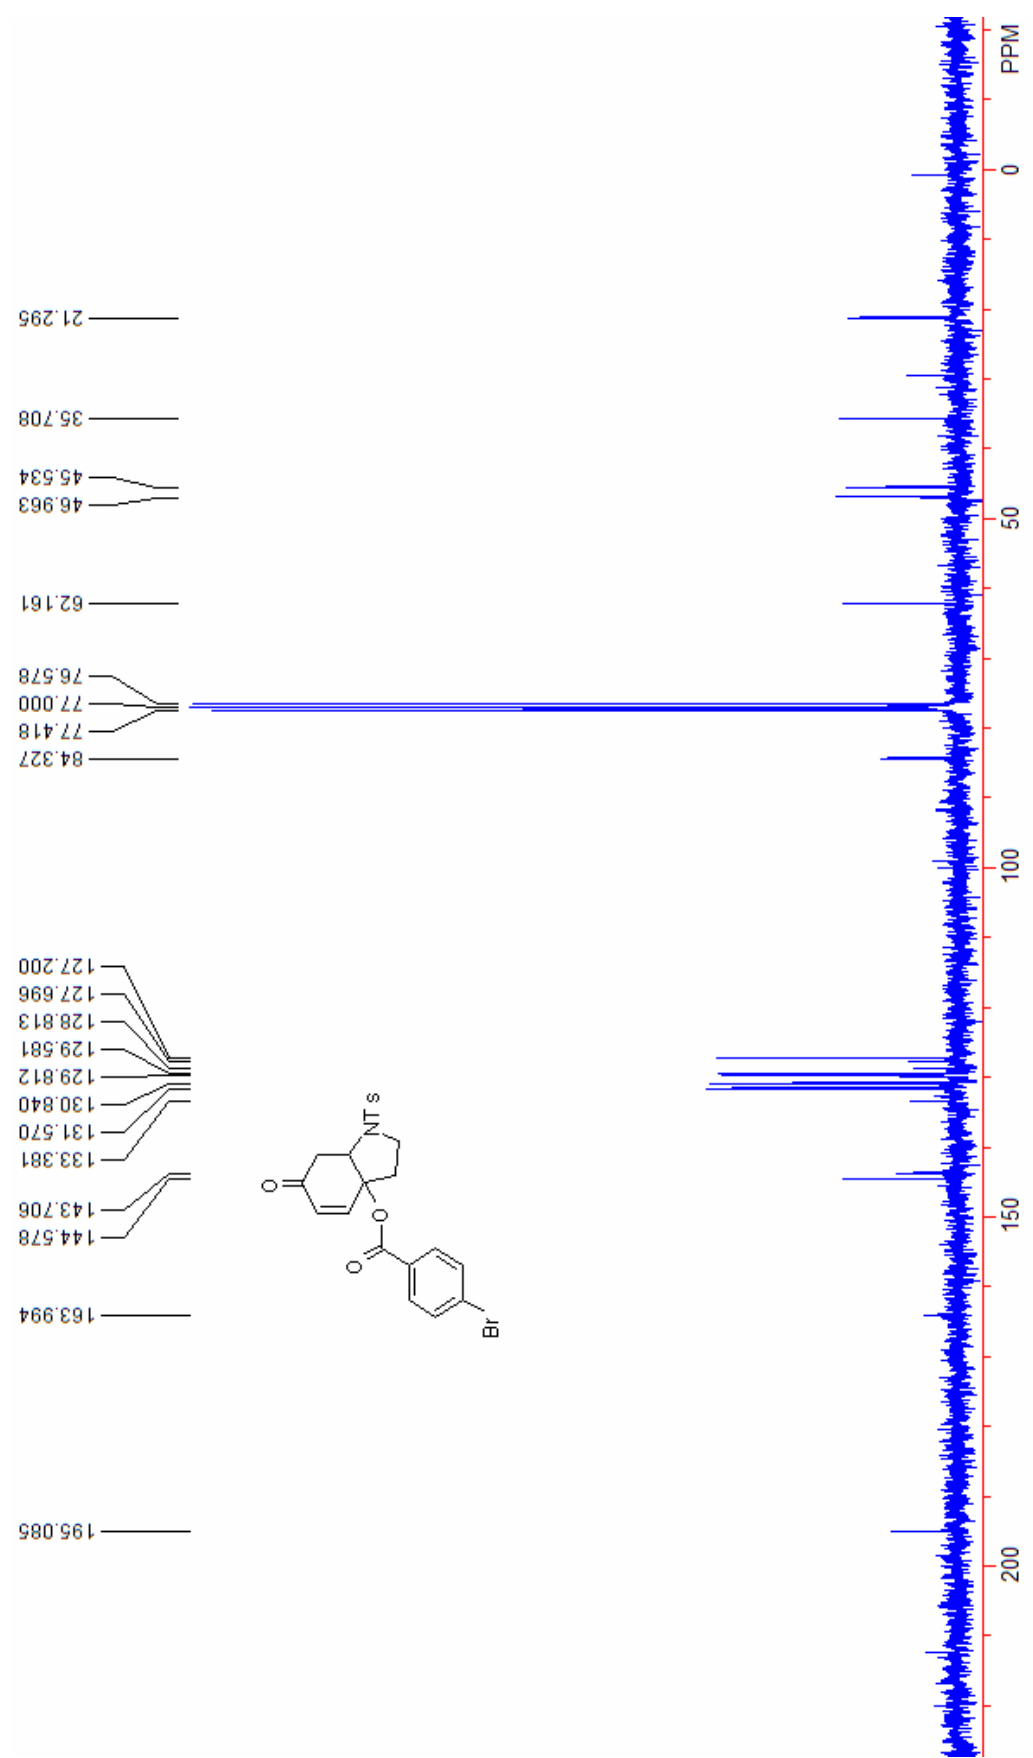

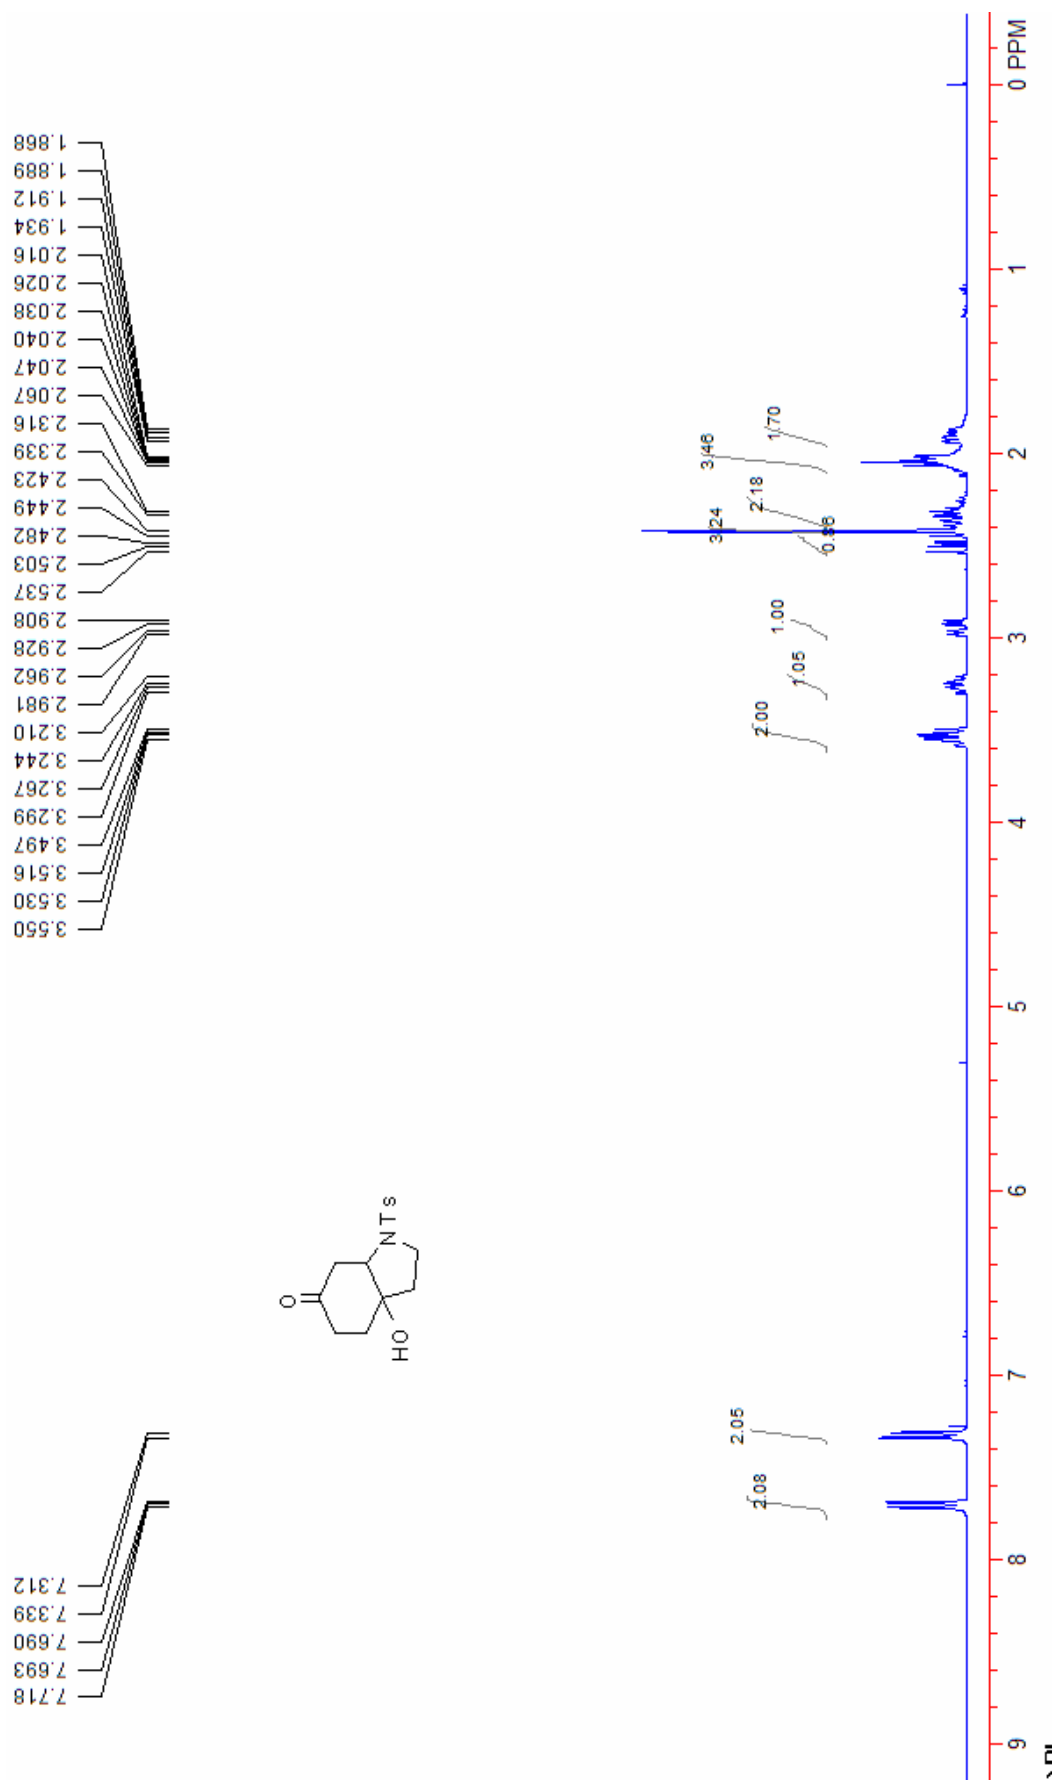

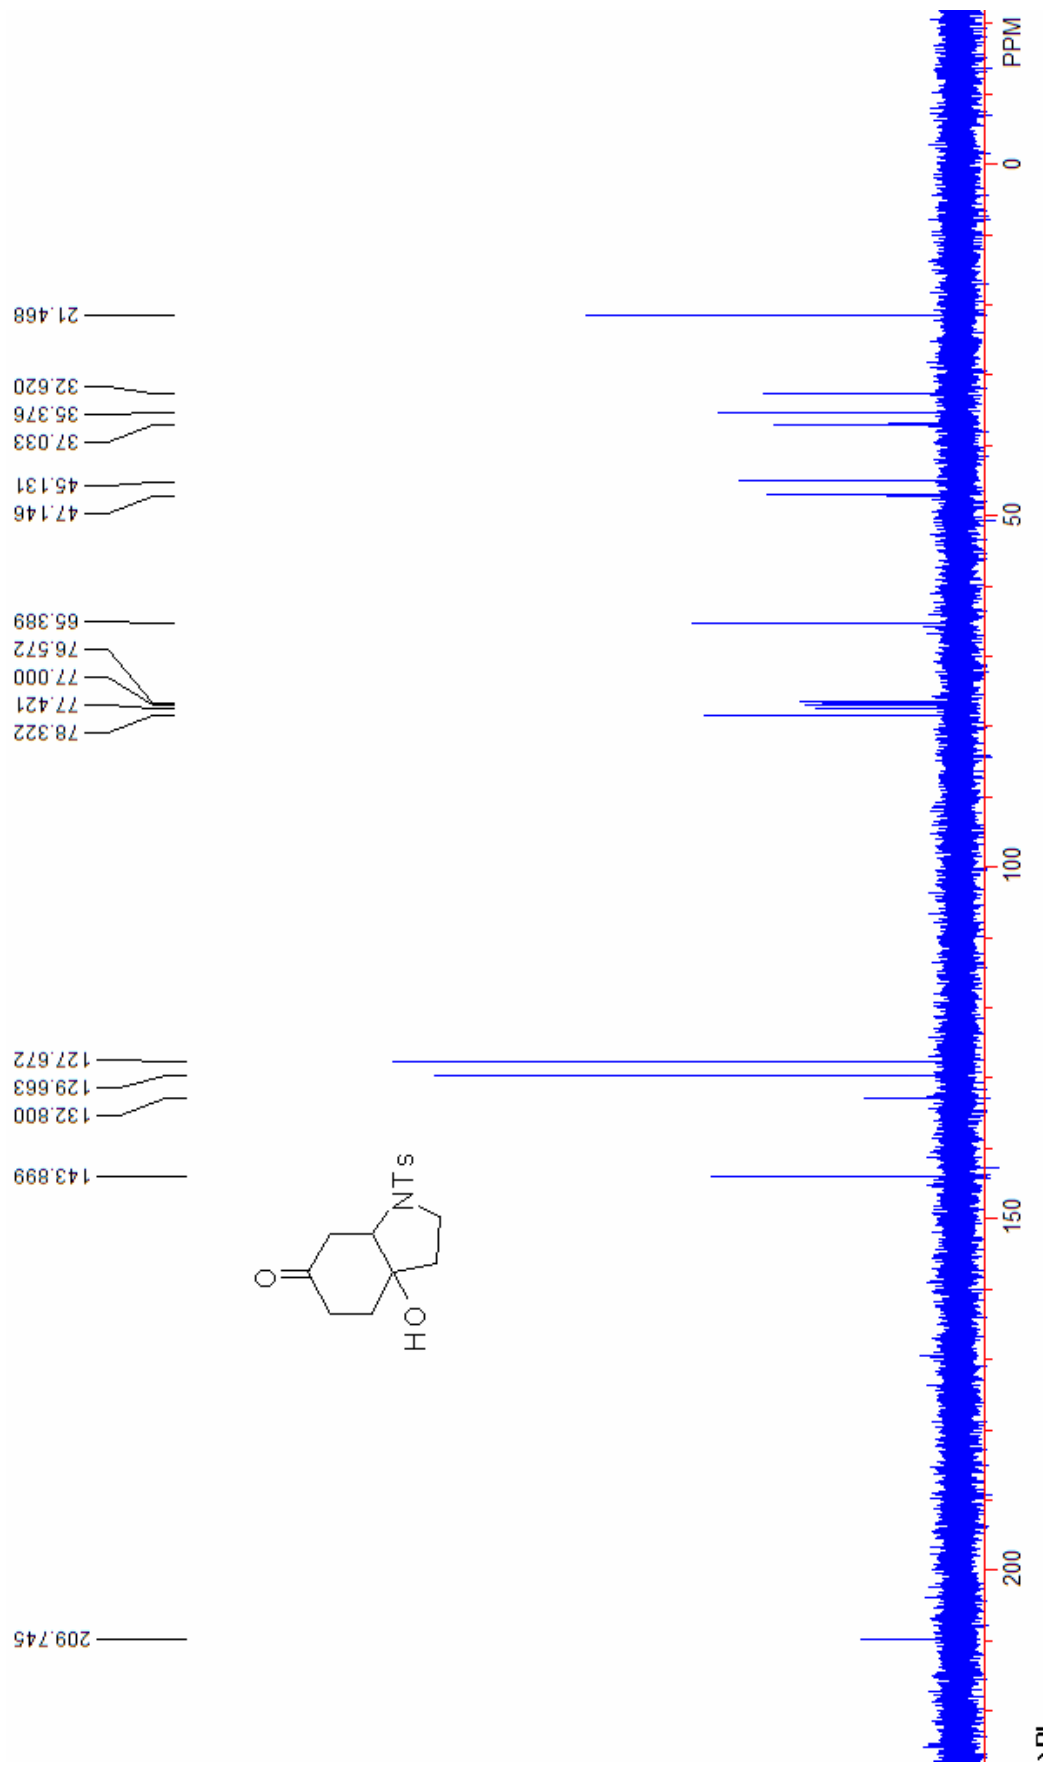

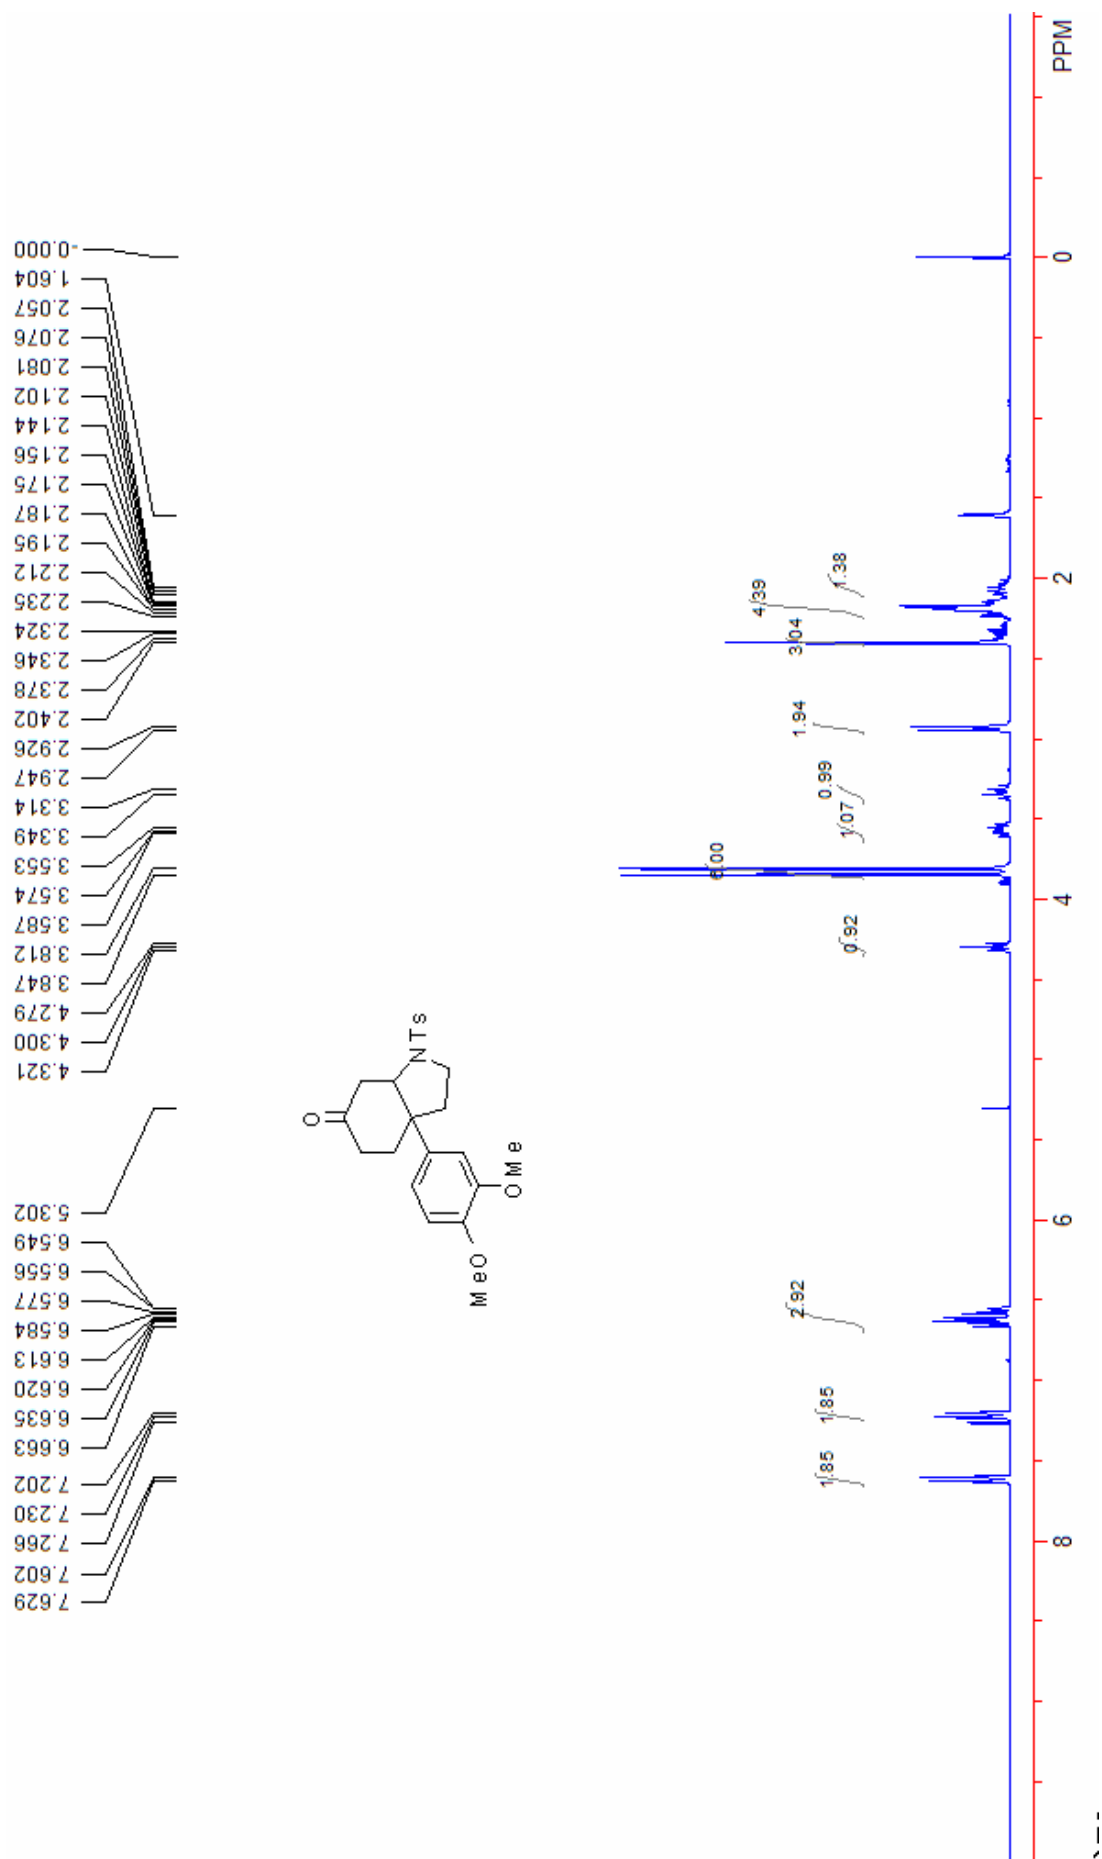

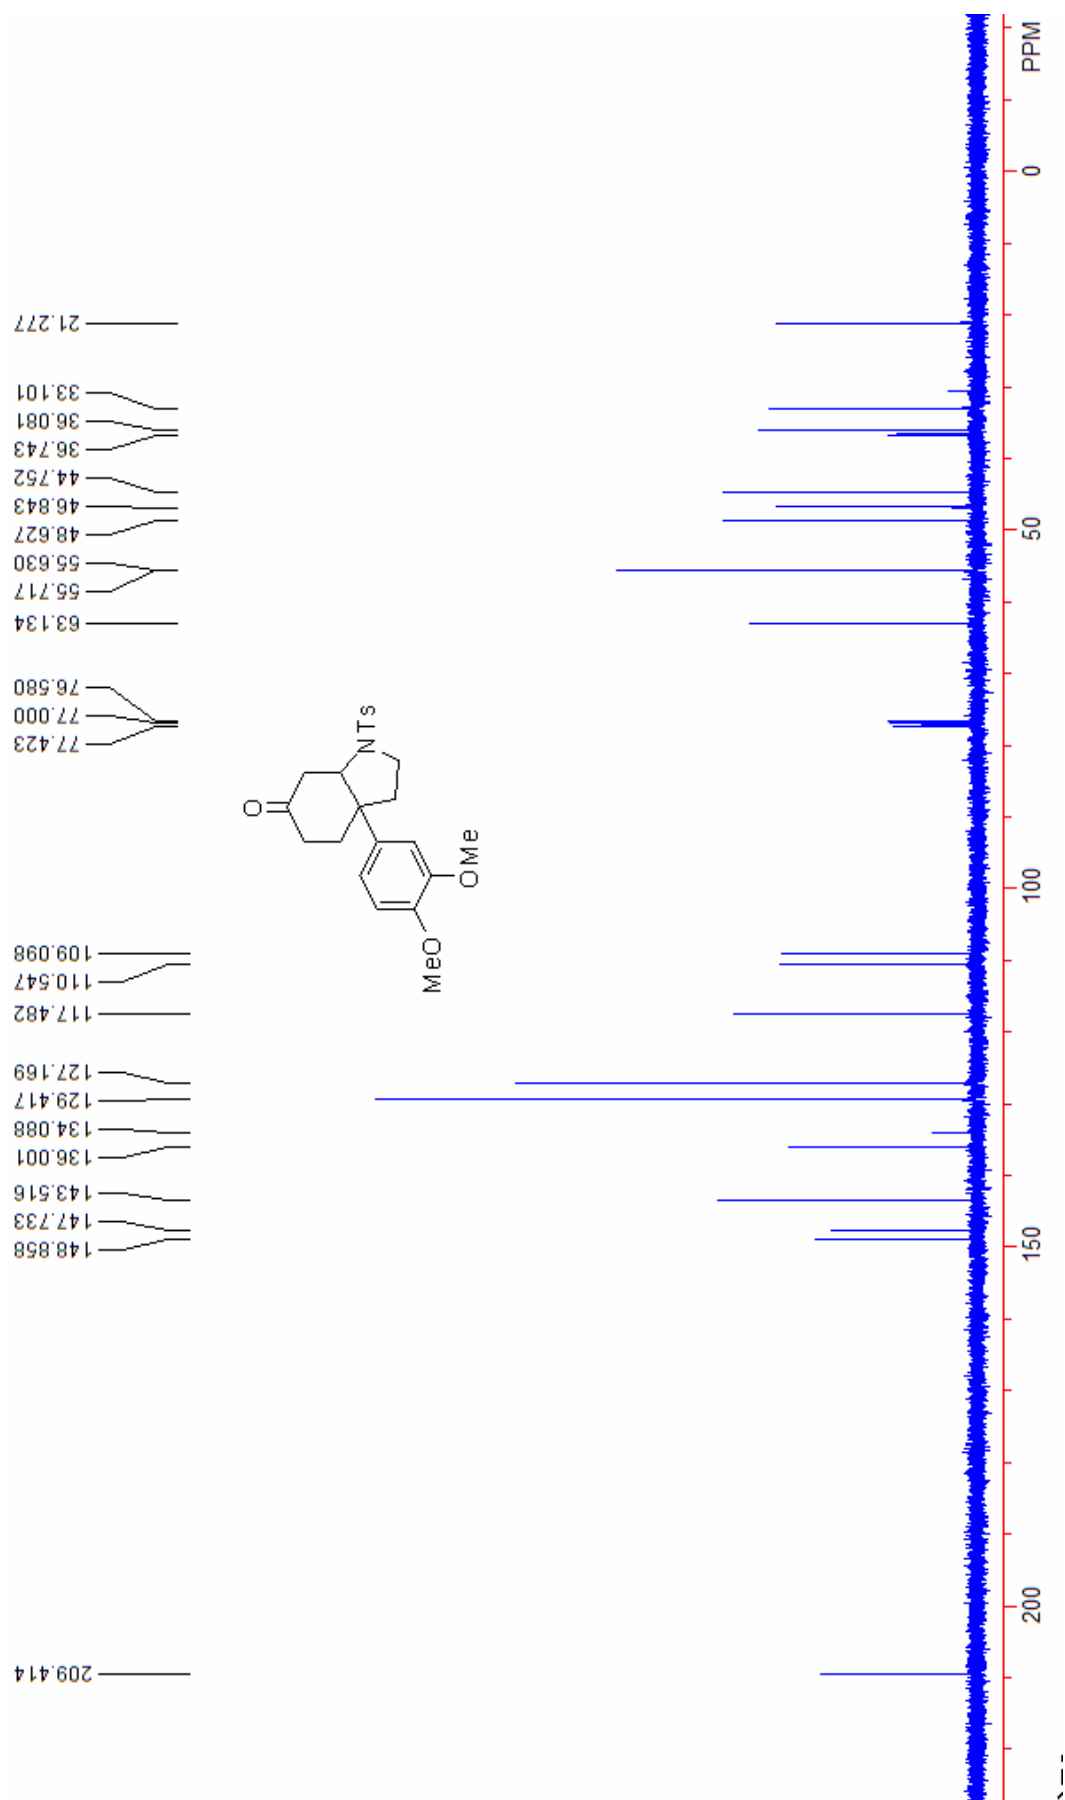



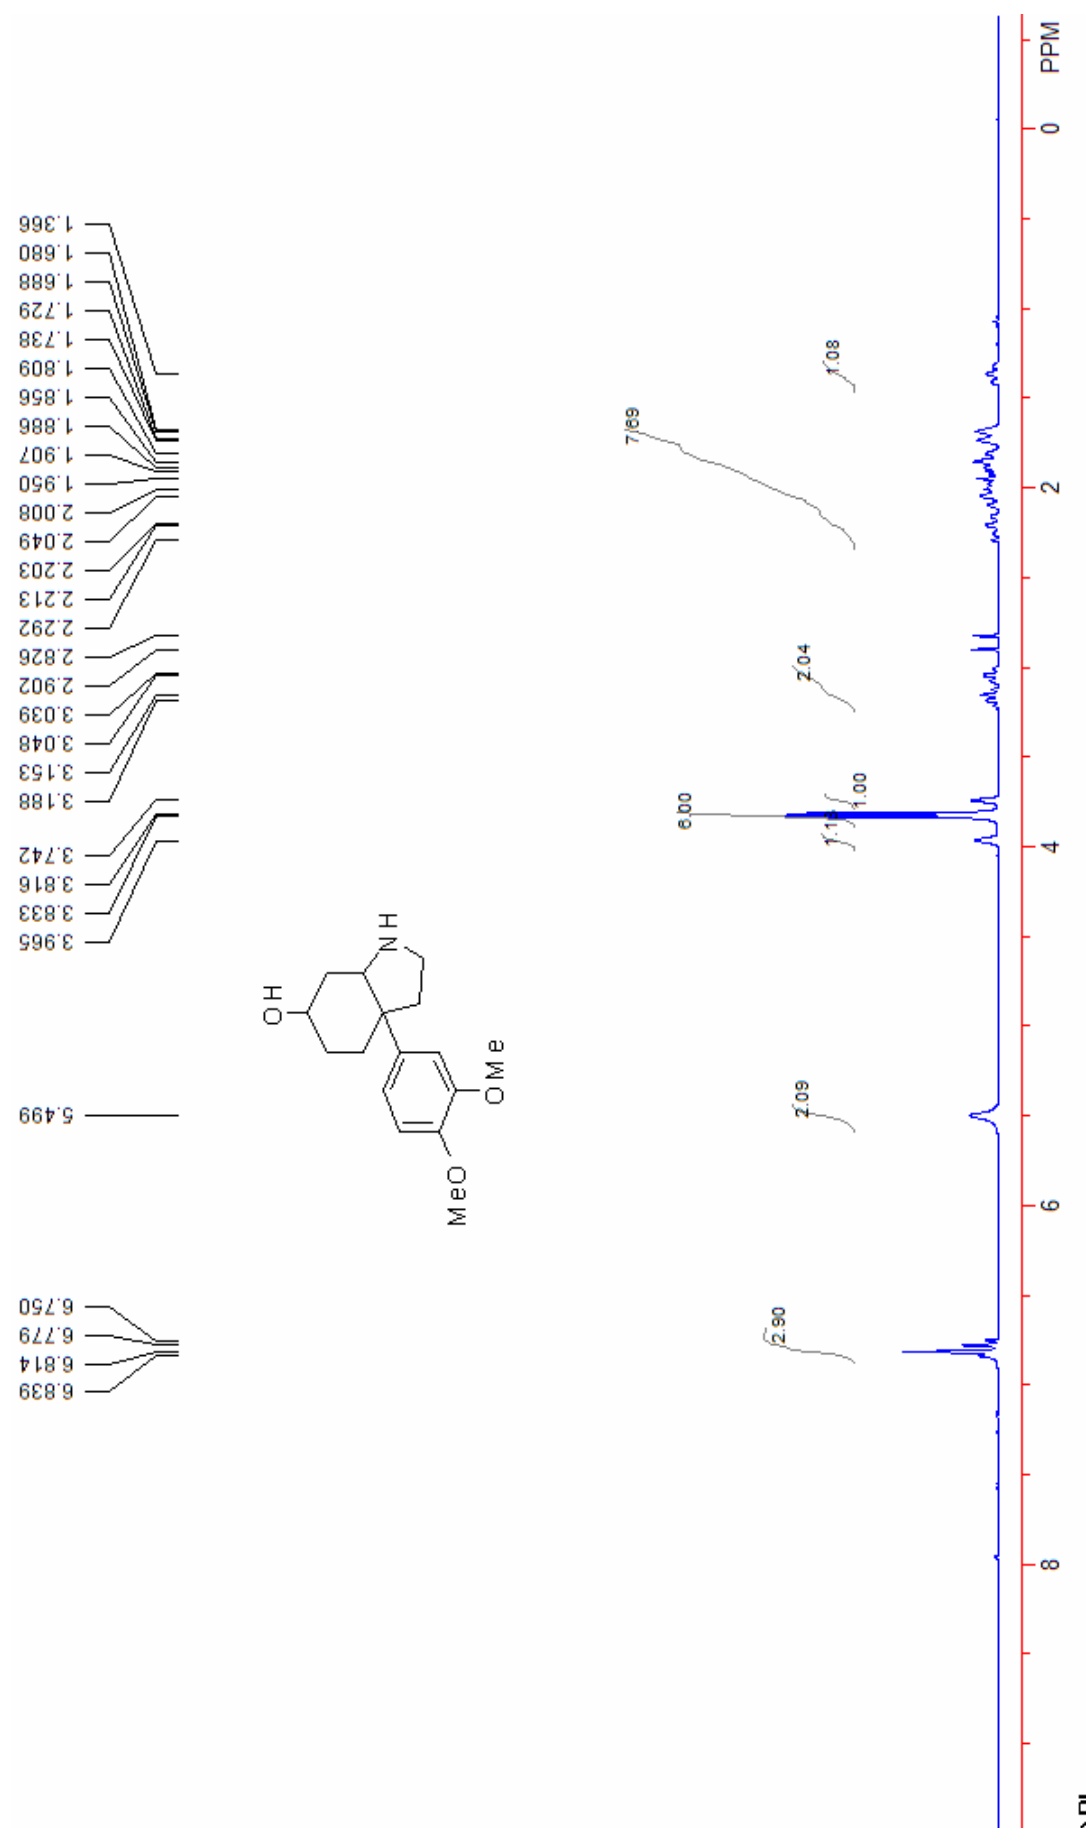

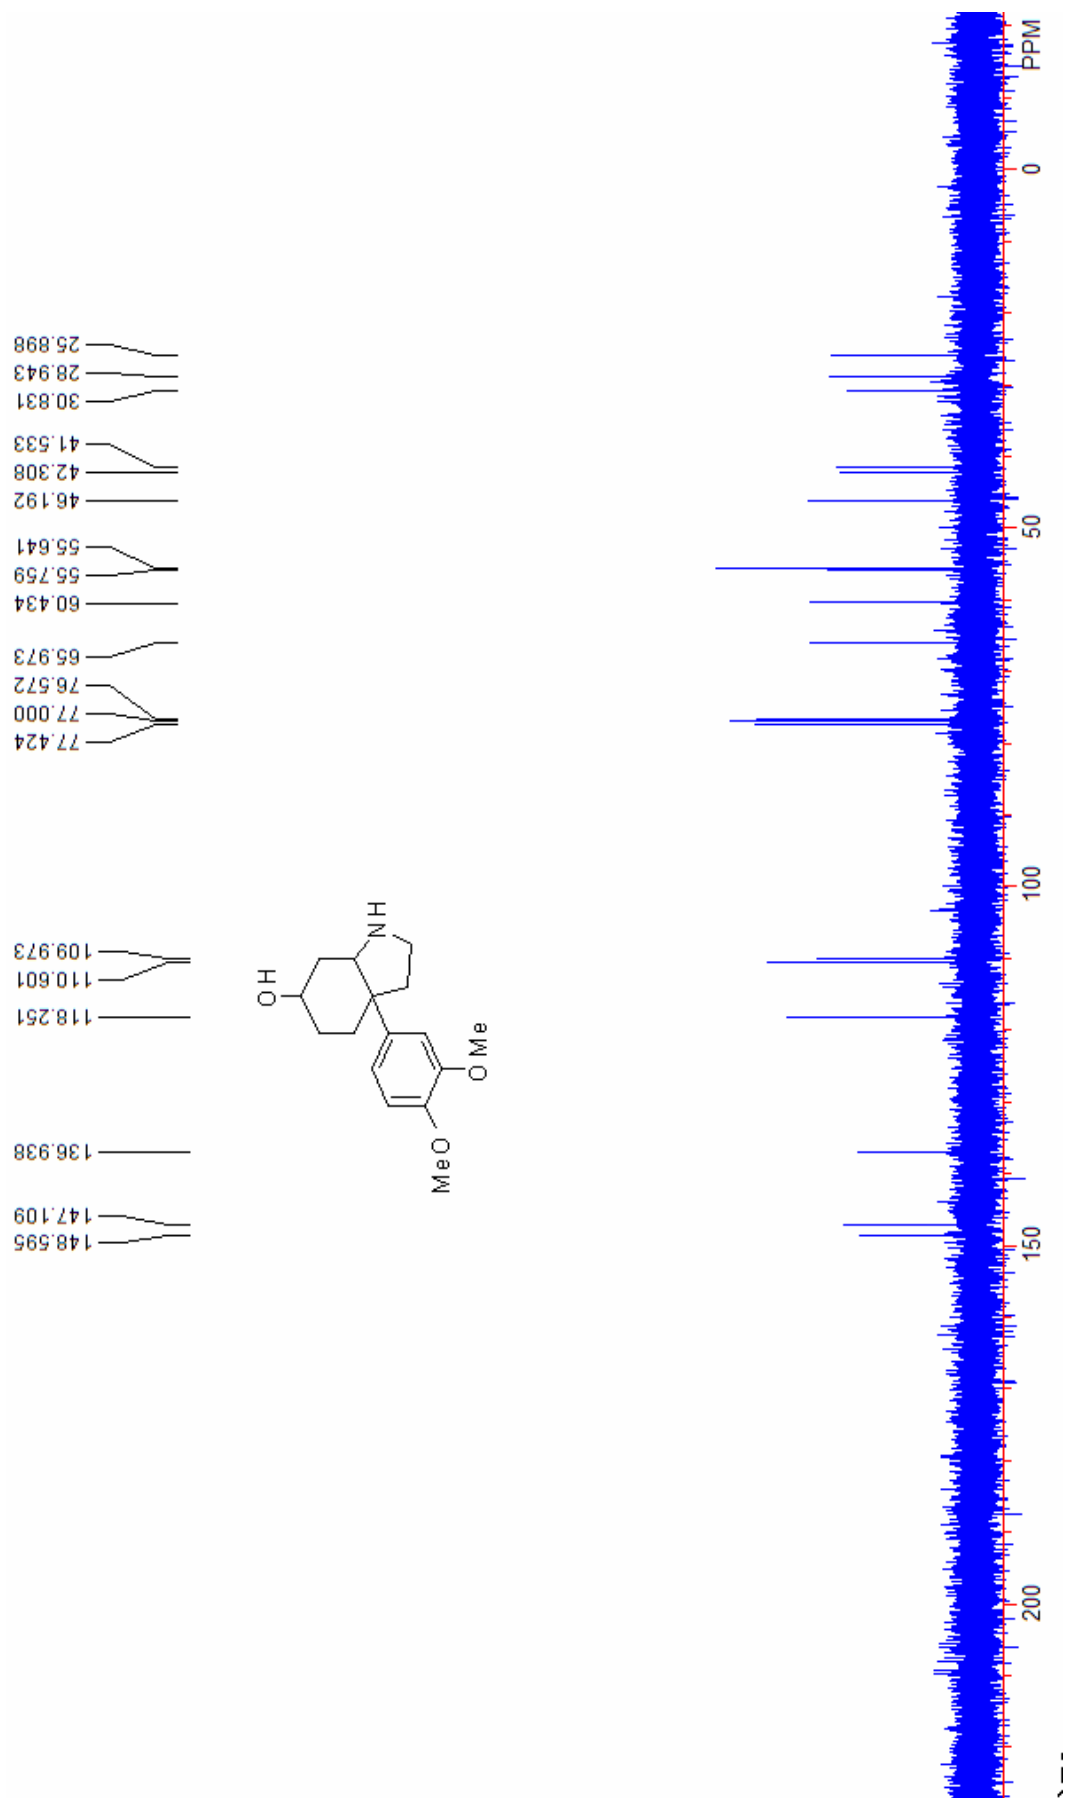

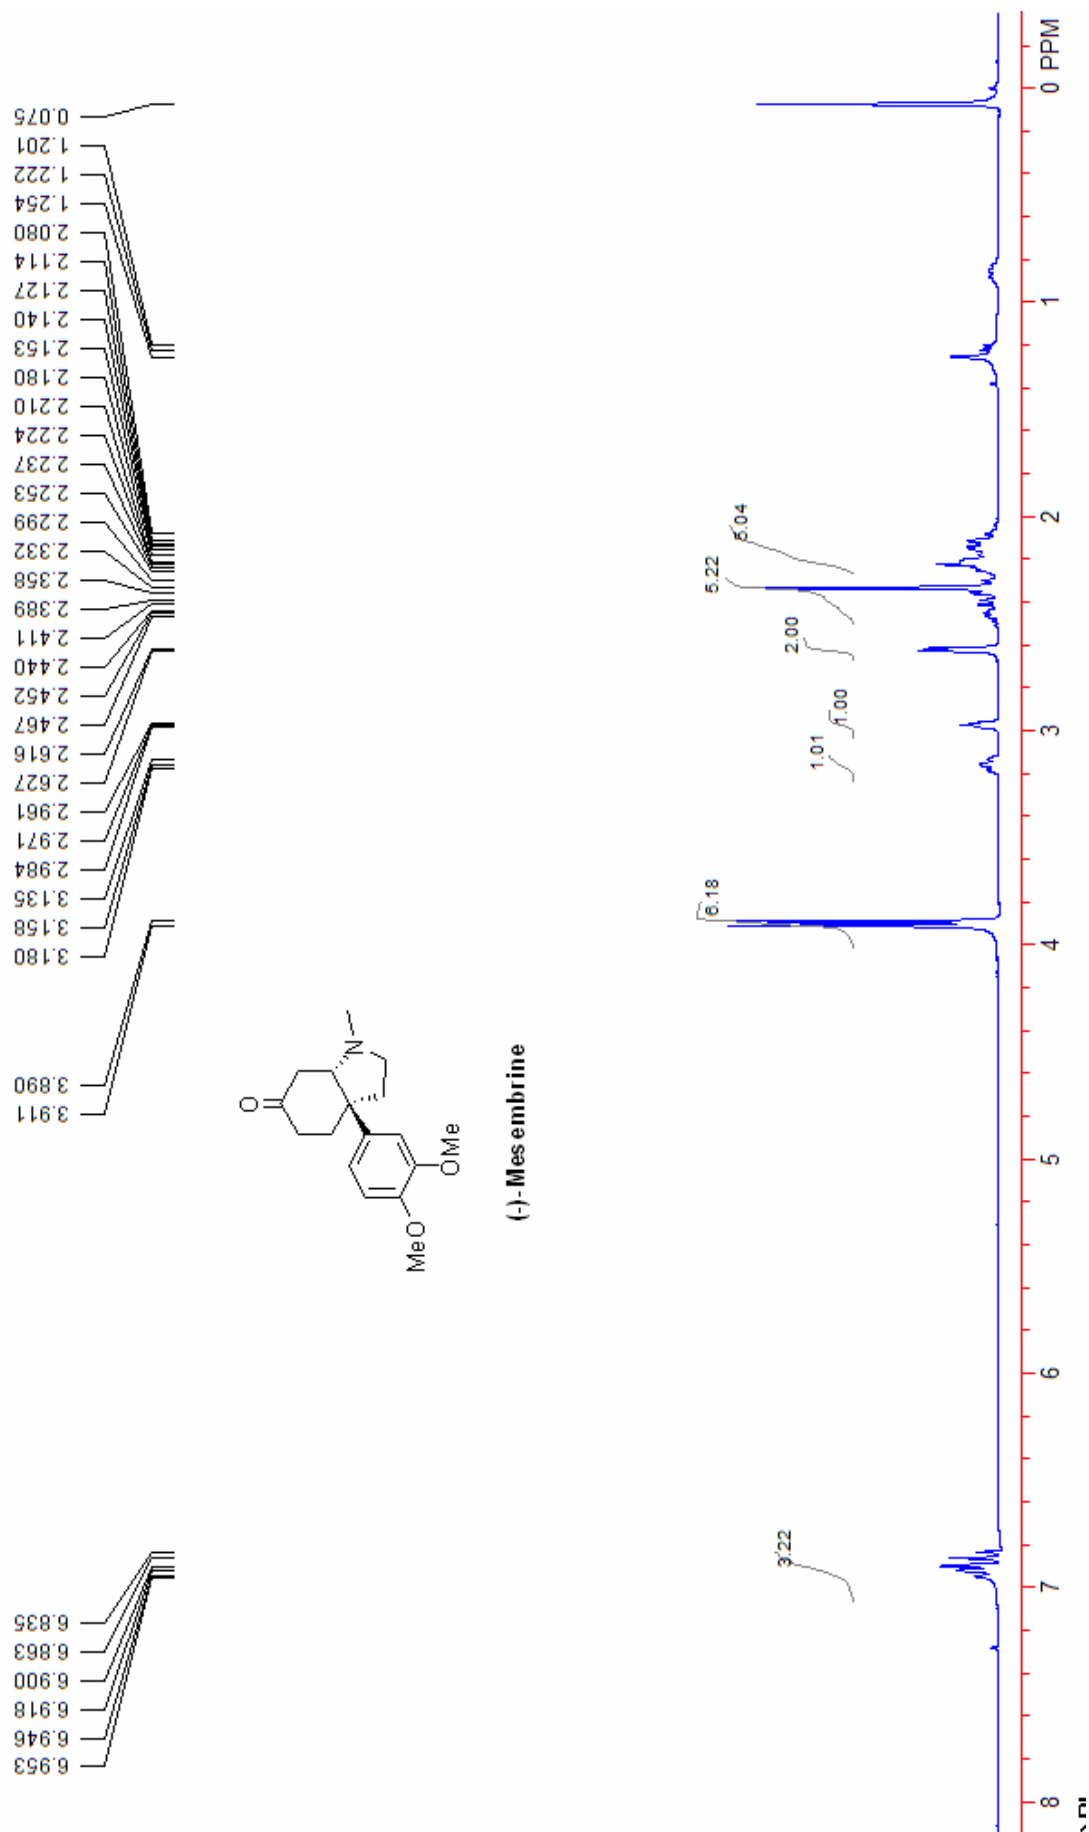

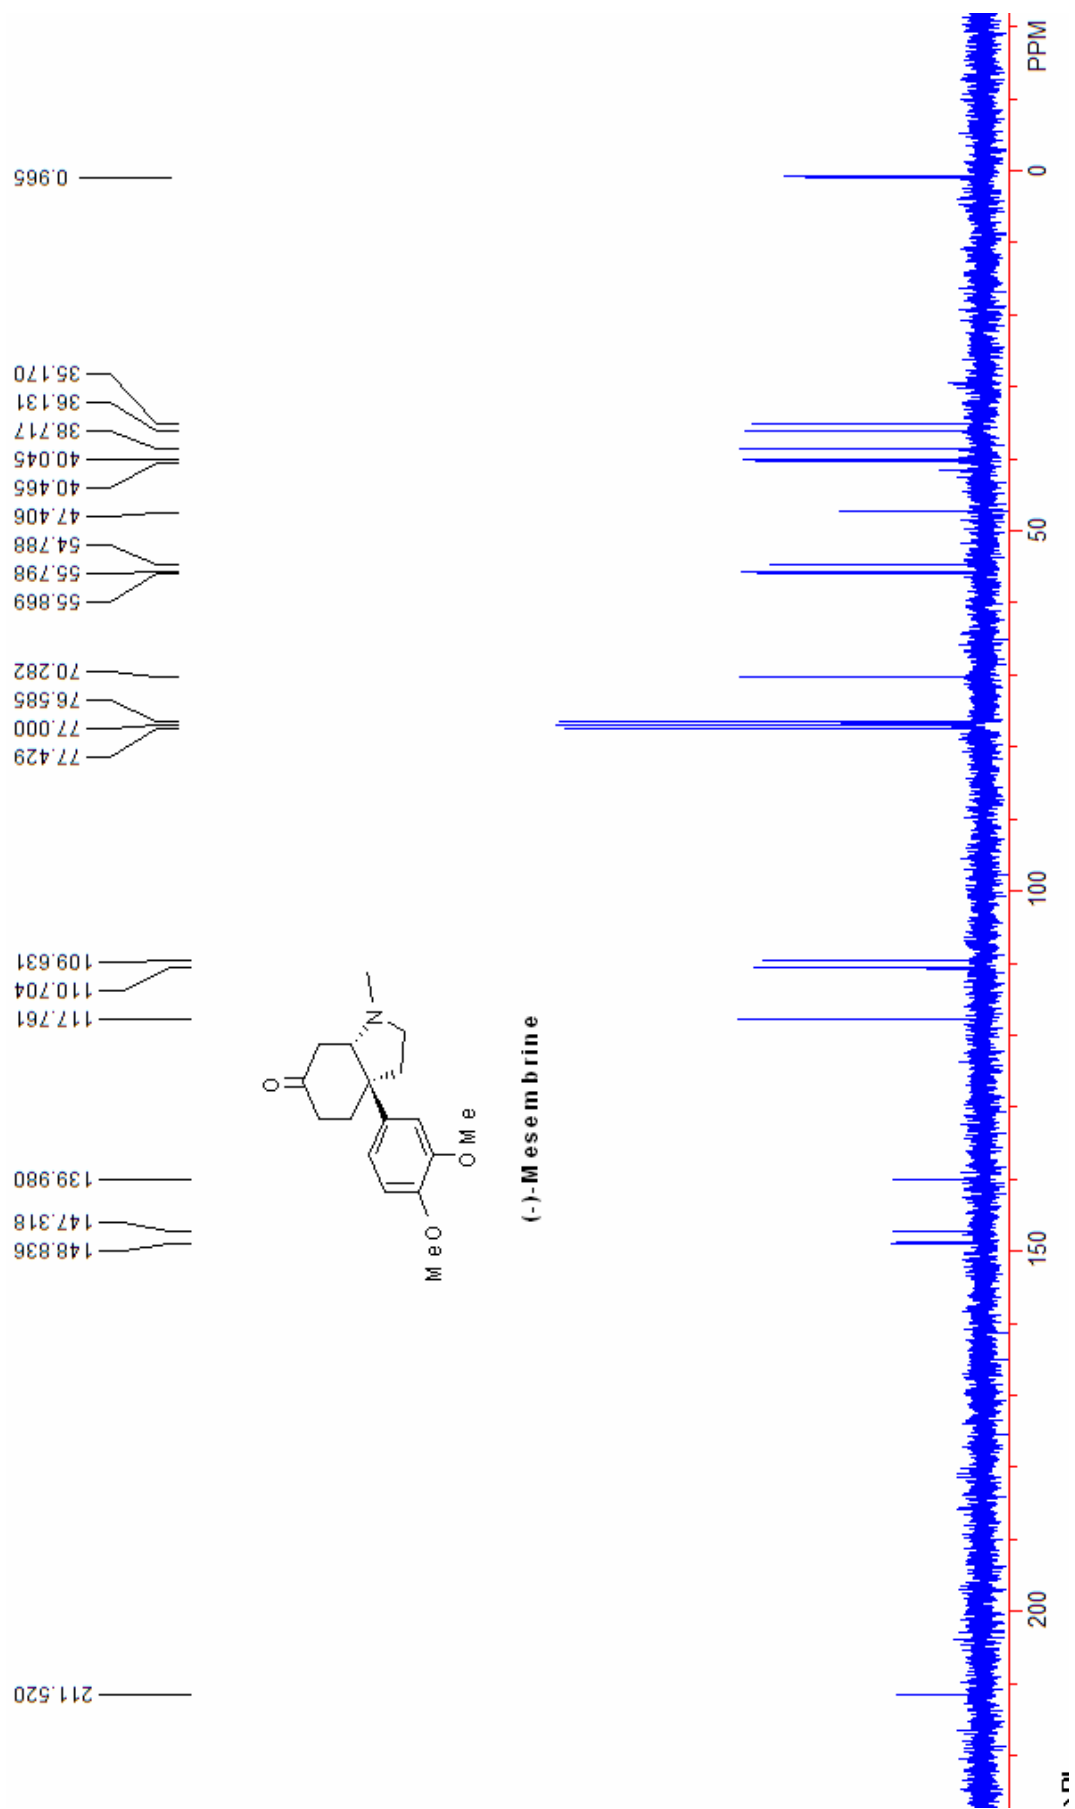

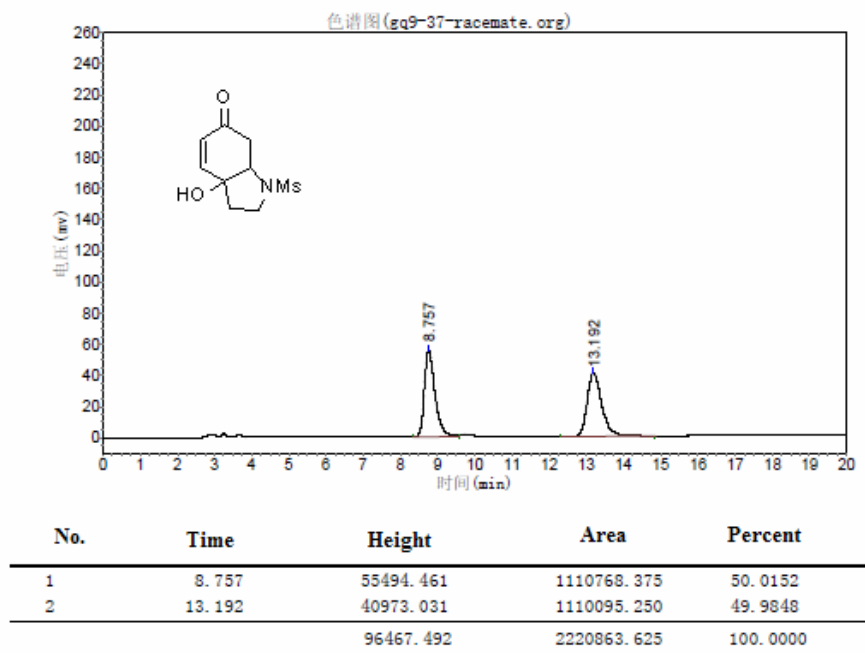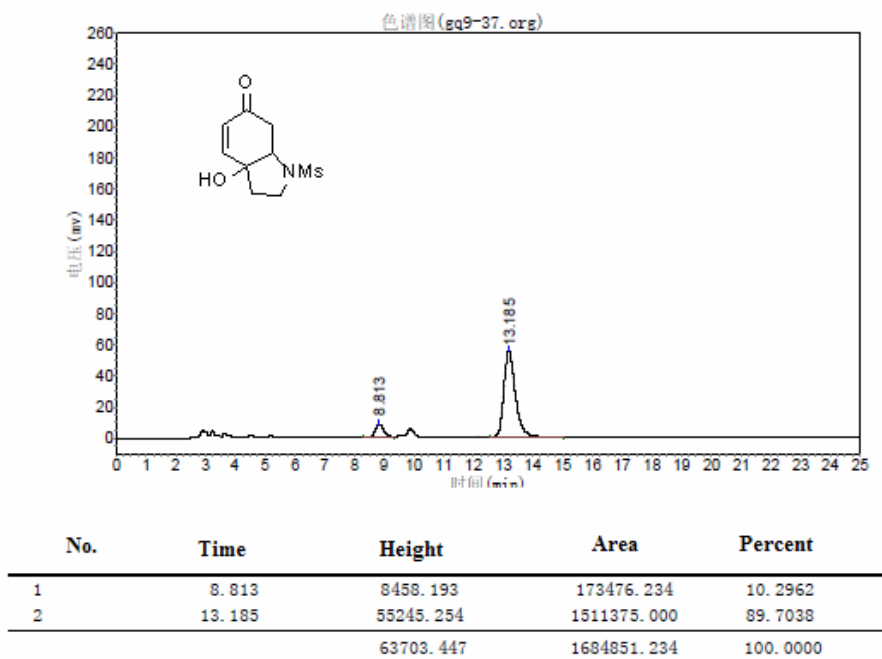

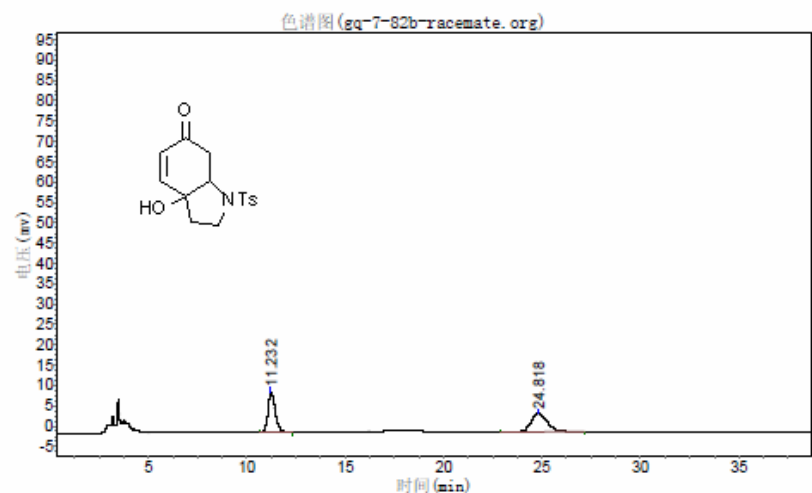

| No. | Time   | Height    | Area       | Percent  |
|-----|--------|-----------|------------|----------|
| 1   | 11.232 | 9918.188  | 255762.000 | 49.7658  |
| 2   | 24.818 | 4488.833  | 258169.094 | 50.2342  |
|     |        | 14407.020 | 513931.094 | 100.0000 |

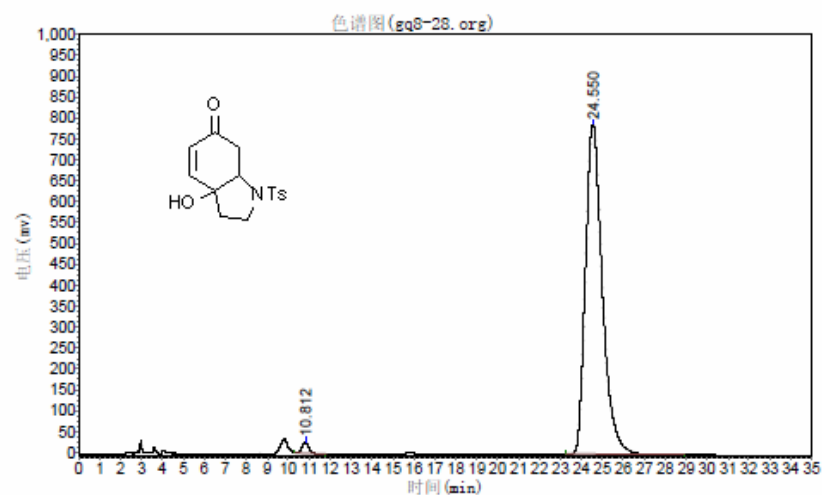

| No. | Time   | Height     | Area         | Percent  |
|-----|--------|------------|--------------|----------|
| 1   | 10.812 | 27611.043  | 628619.875   | 1.4157   |
| 2   | 24.550 | 789289.250 | 43775748.000 | 98.5843  |
|     |        | 816900.293 | 44404367.875 | 100.0000 |

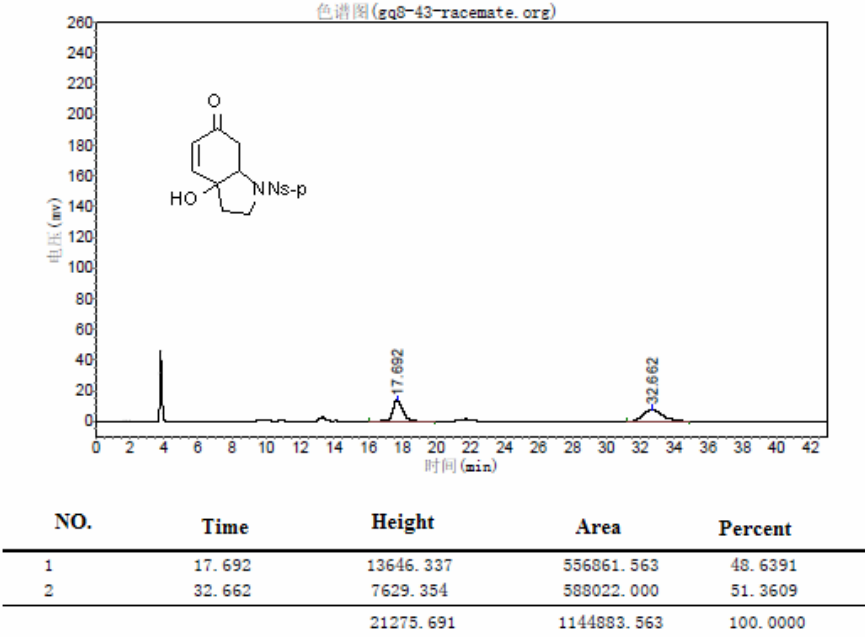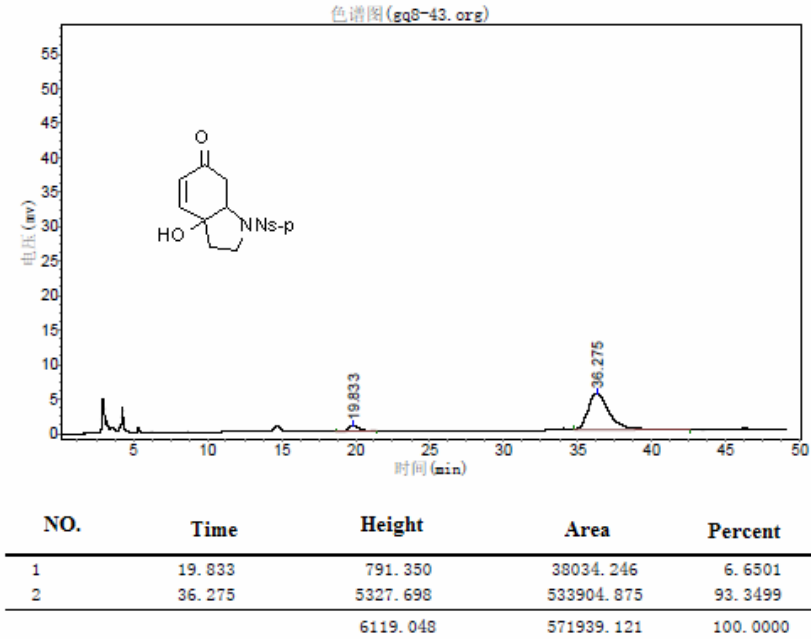

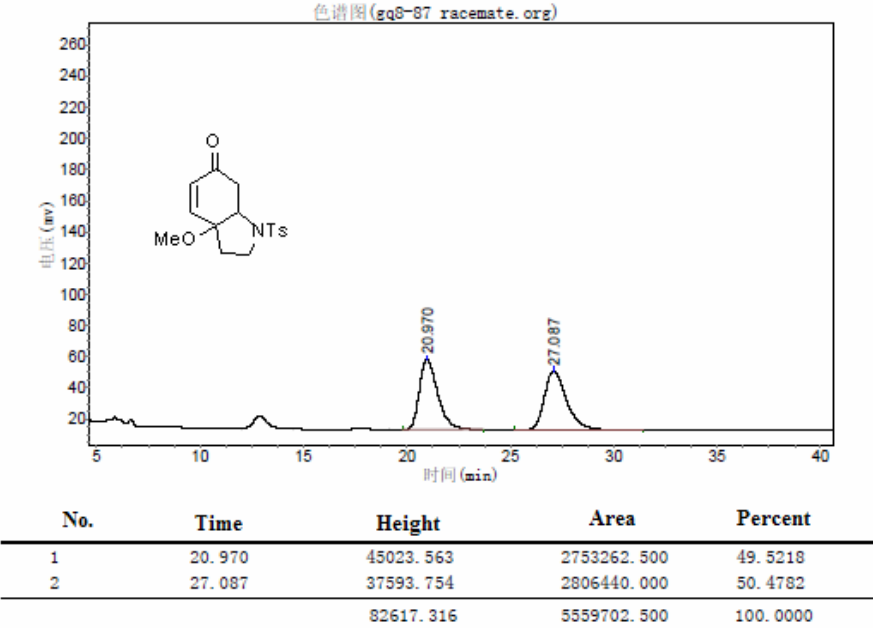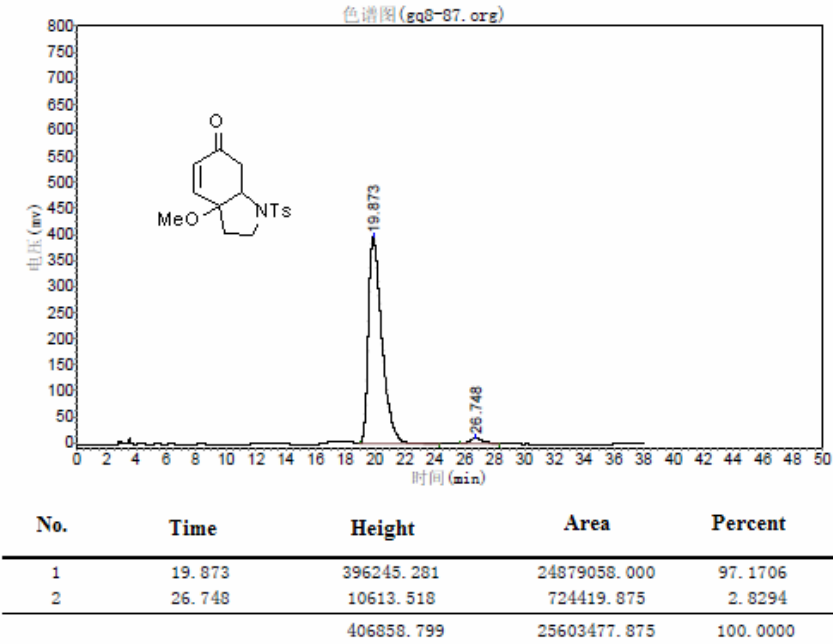



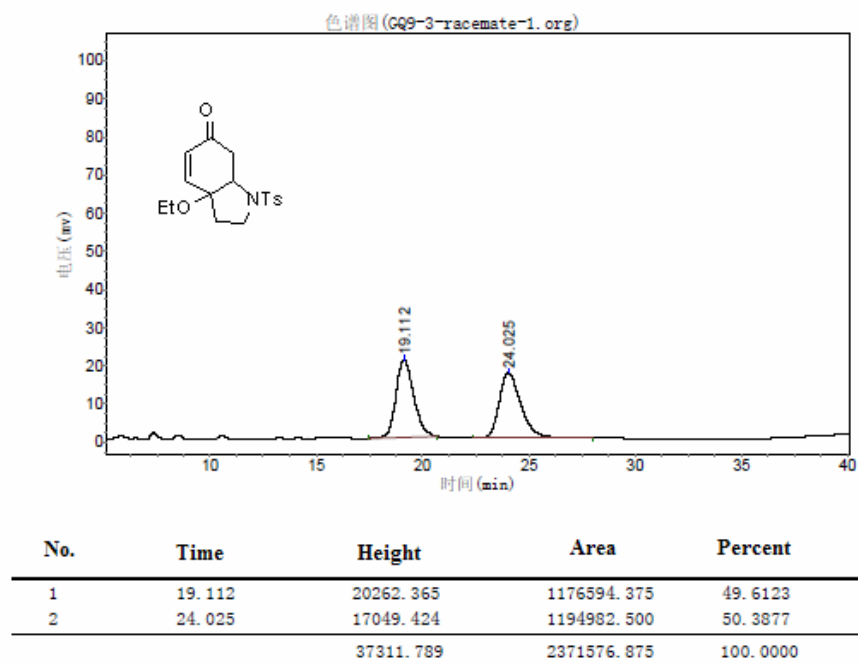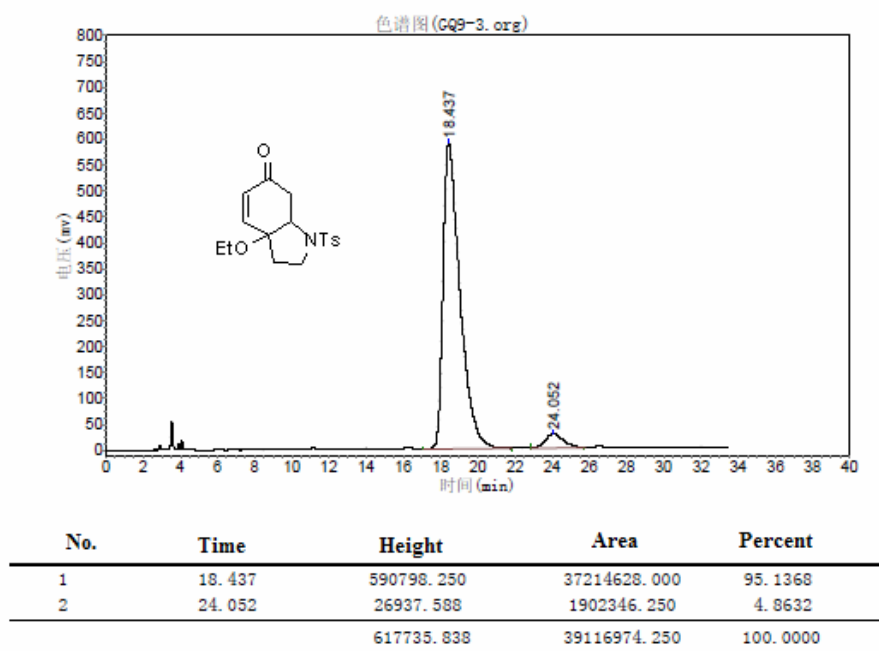

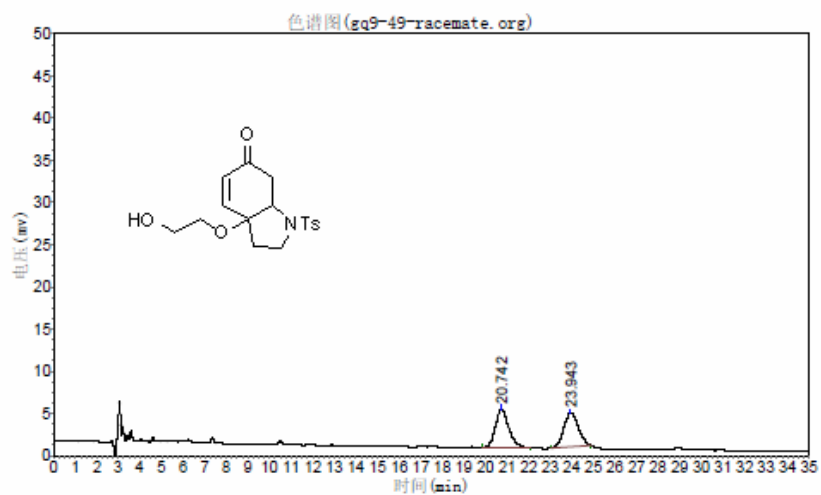

| No. | Time   | Height   | Area       | Percent  |
|-----|--------|----------|------------|----------|
| 1   | 20.742 | 4510.603 | 194078.250 | 50.7465  |
| 2   | 23.943 | 4022.419 | 188368.234 | 49.2535  |
|     |        | 8533.021 | 382446.484 | 100.0000 |

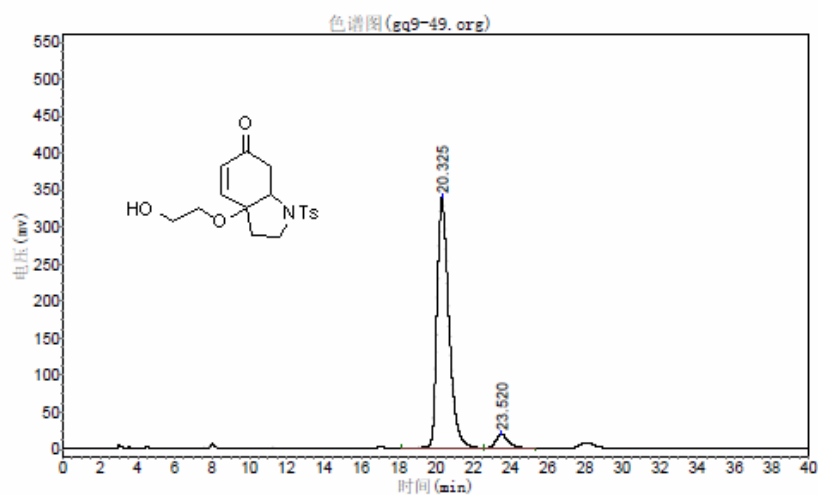

| No. | Time   | Height     | Area         | Percent  |
|-----|--------|------------|--------------|----------|
| 1   | 20.325 | 338488.531 | 14861093.000 | 94.5072  |
| 2   | 23.520 | 17911.766  | 863726.688   | 5.4928   |
|     |        | 356400.297 | 15724819.688 | 100.0000 |

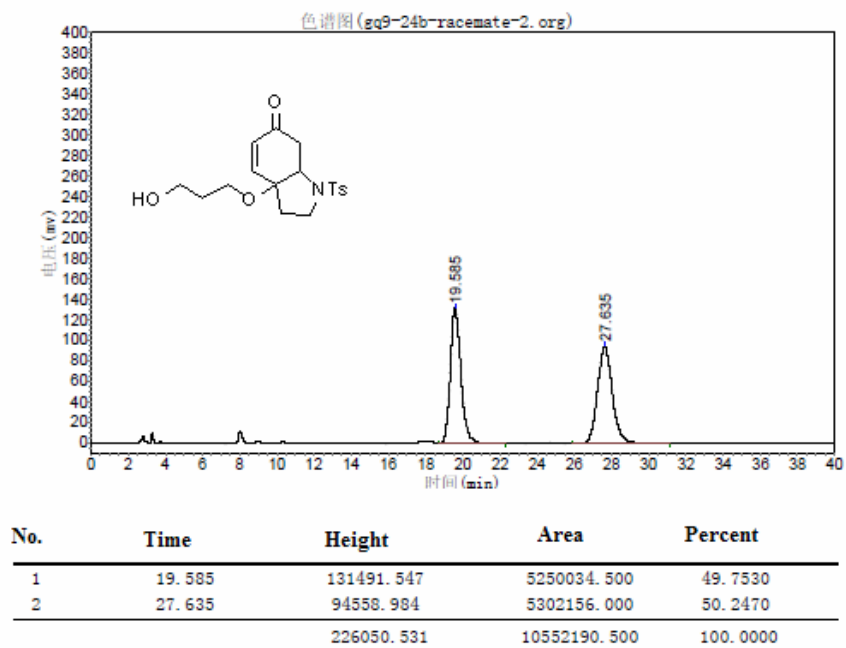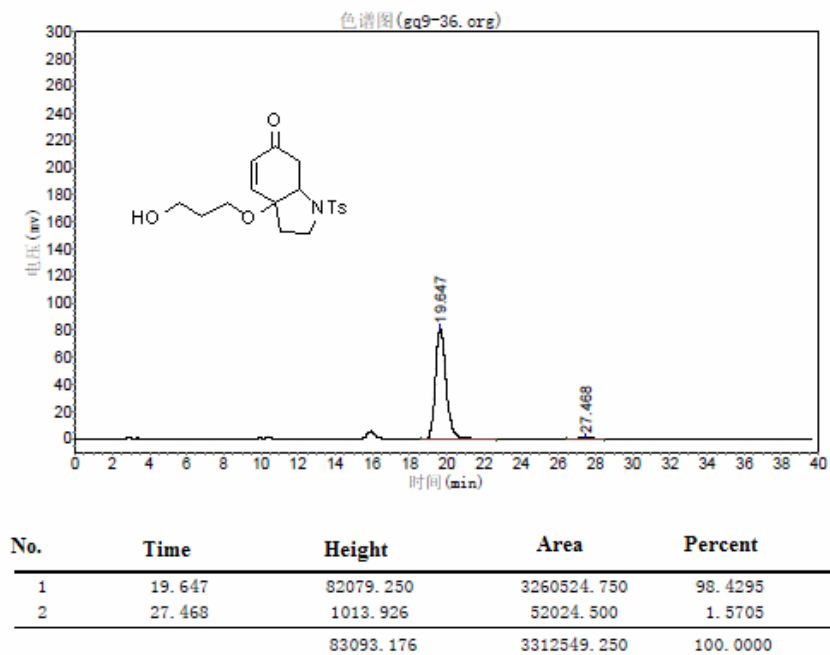

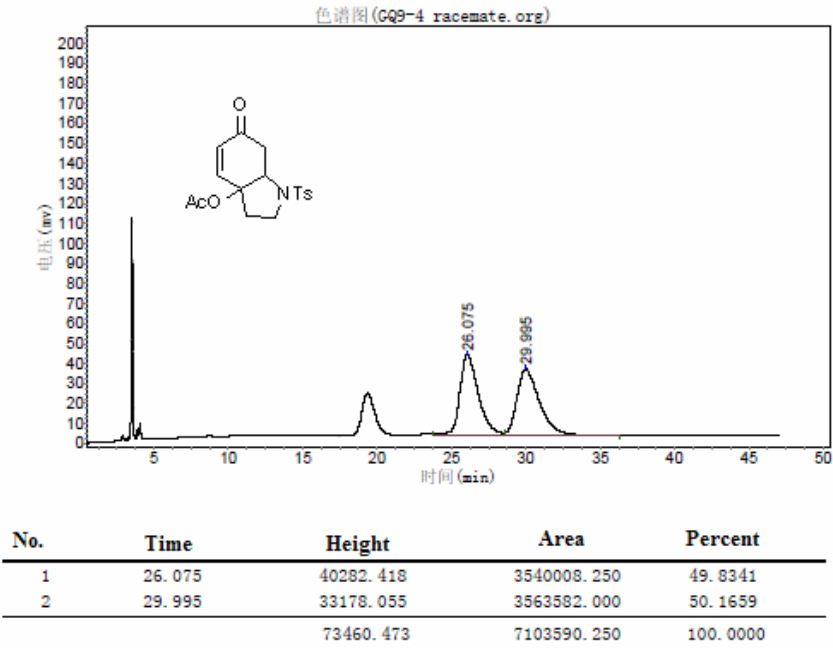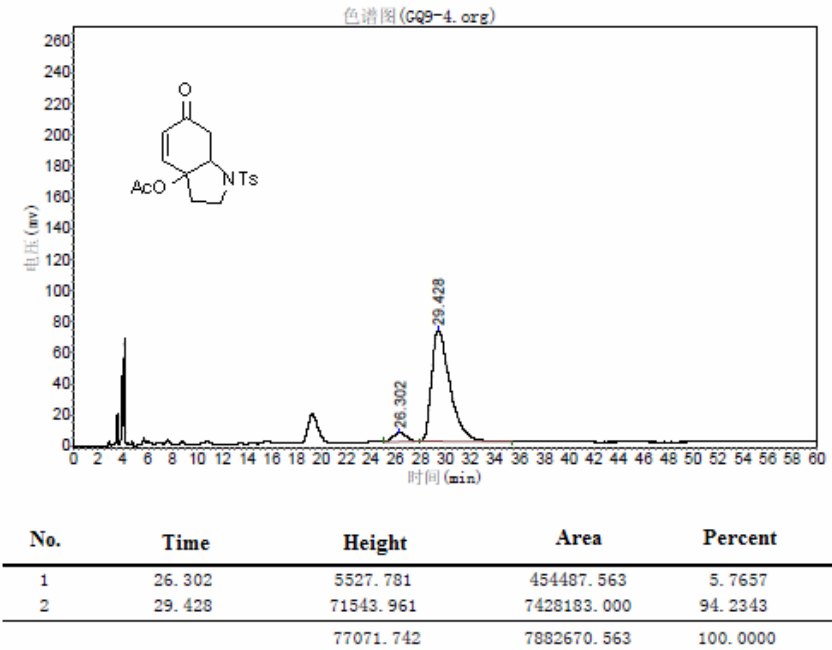

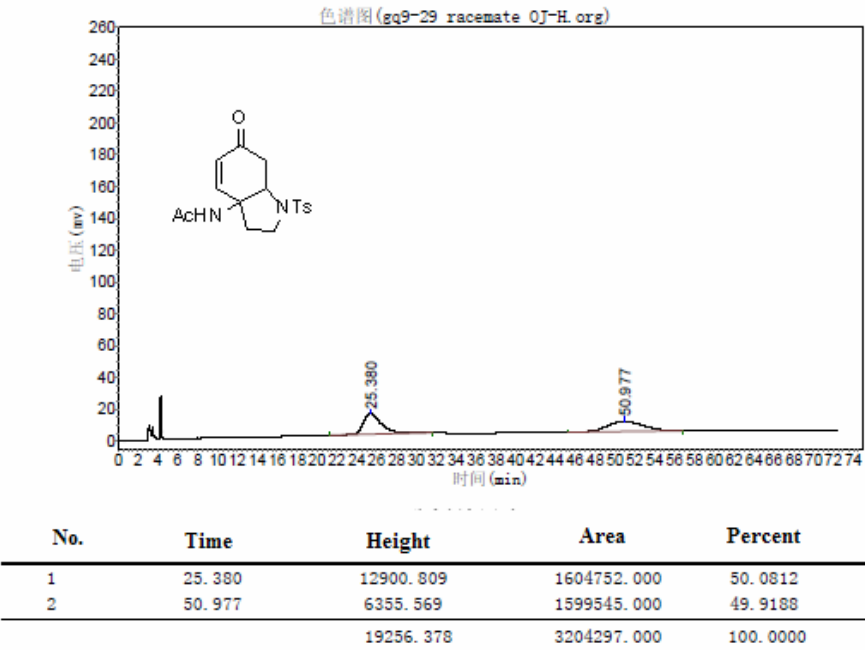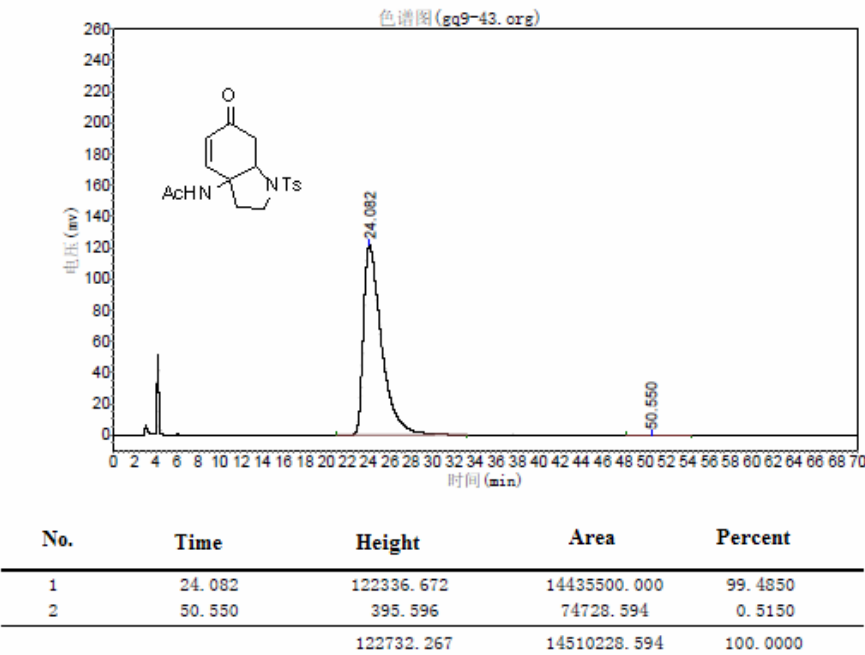

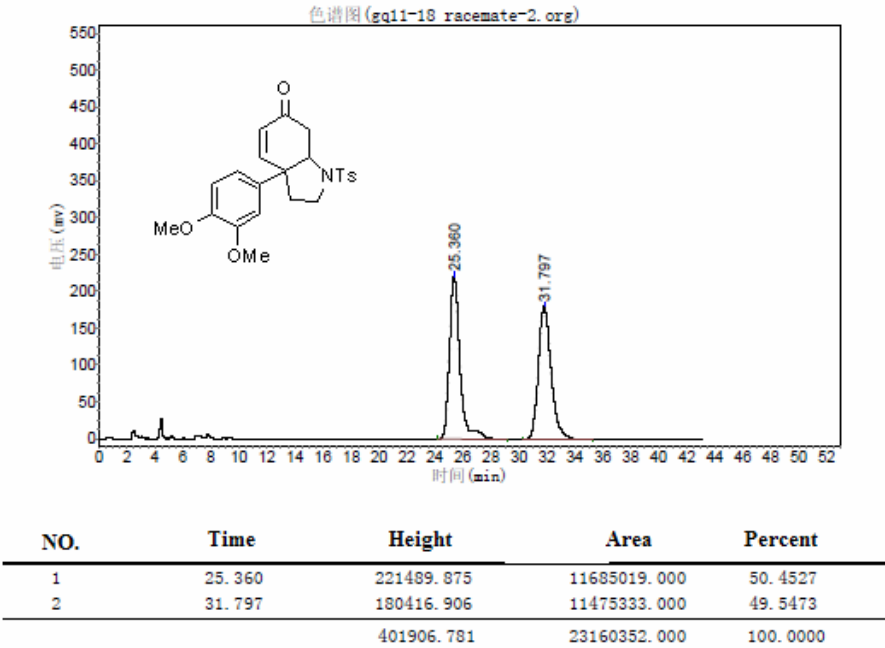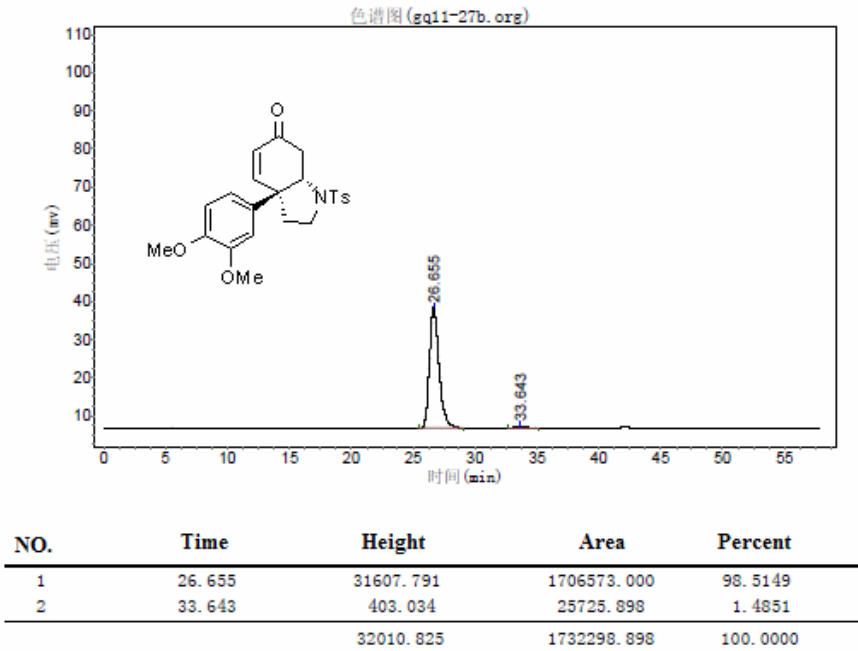

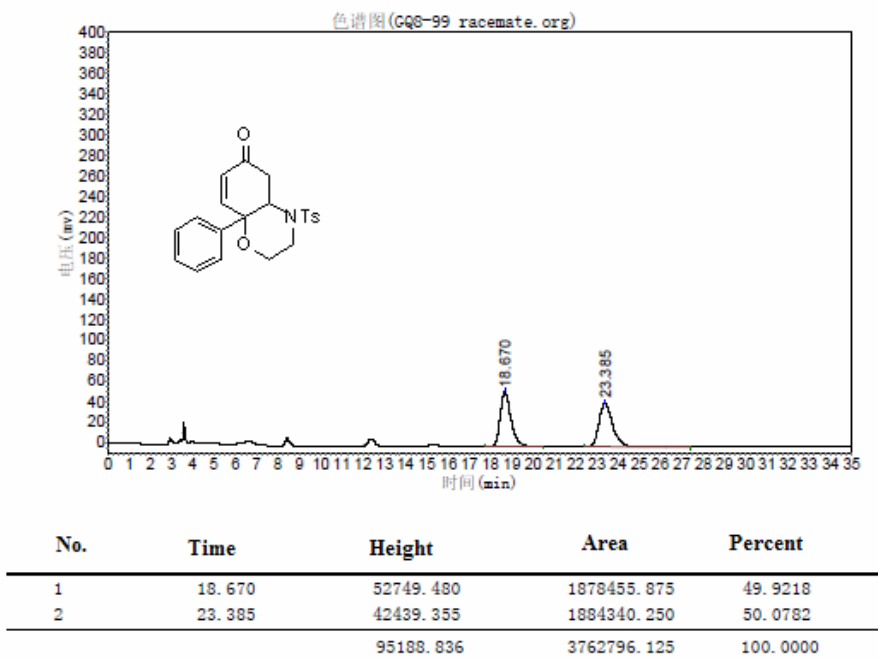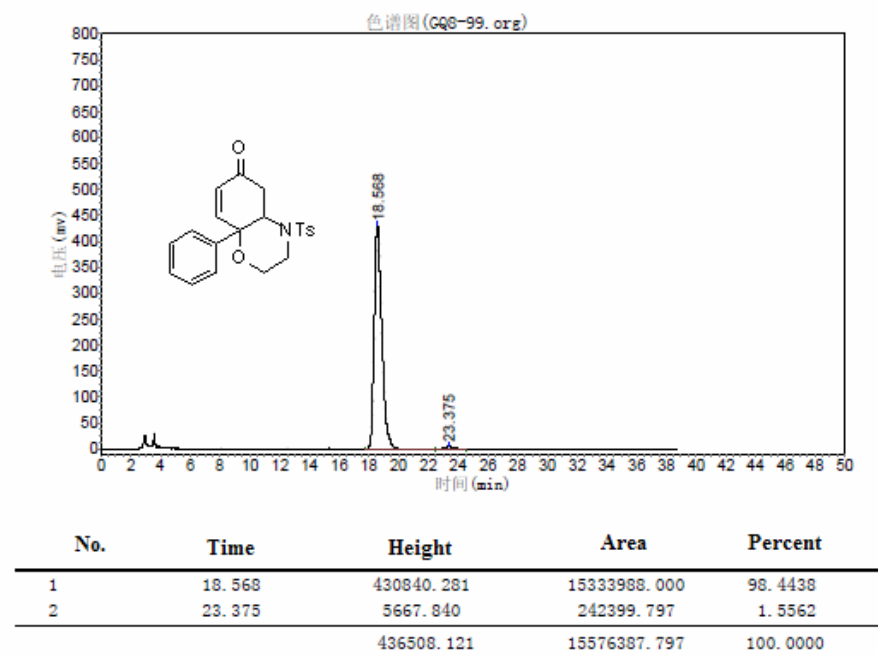

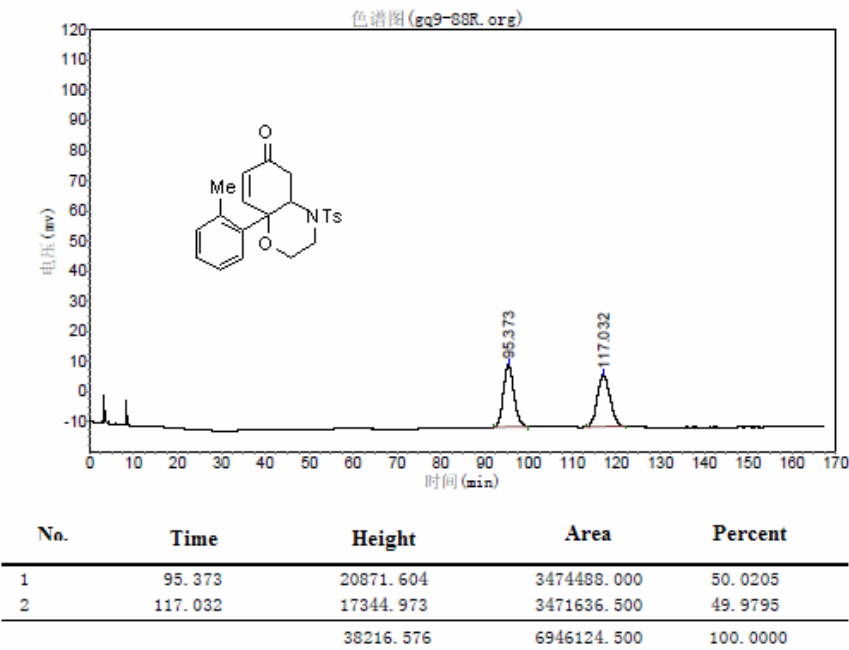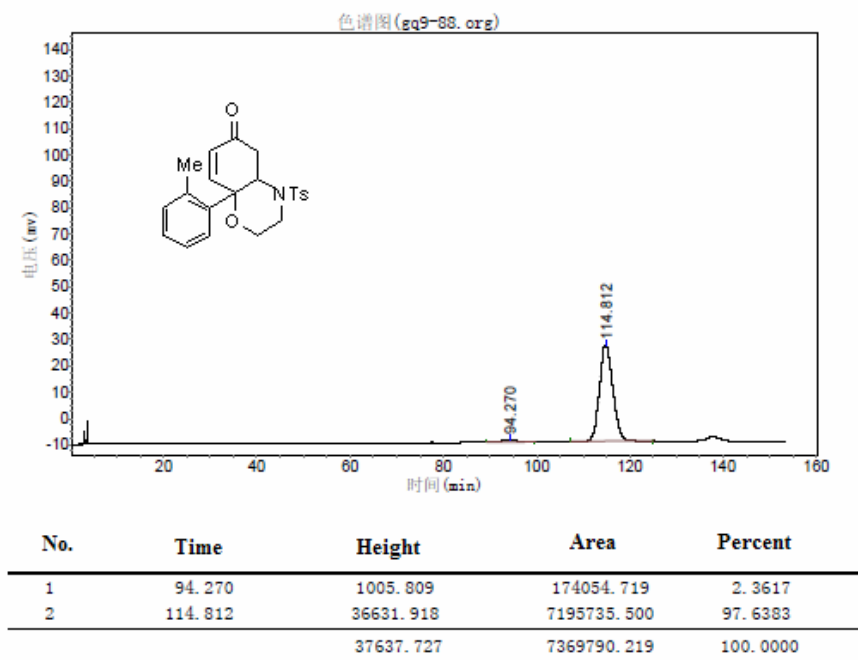



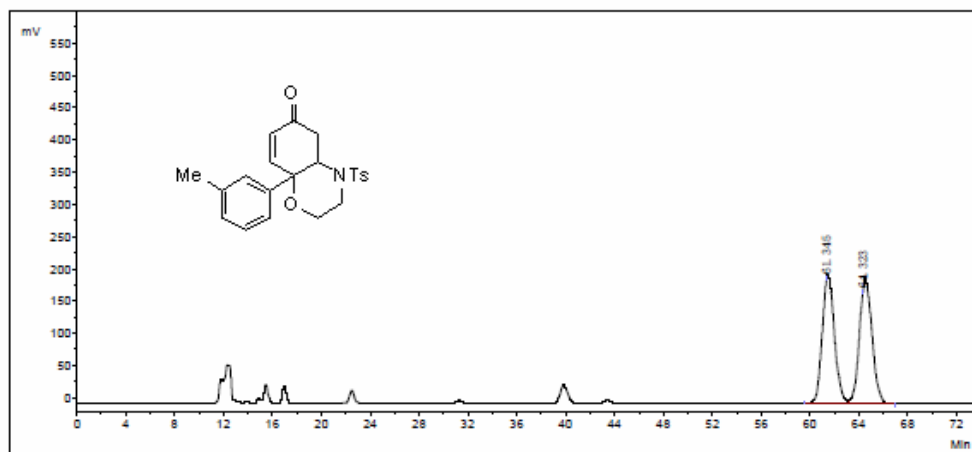

| No.   | PeakNo | R. Time | PeakHeight | PeakArea   | PerCent  |
|-------|--------|---------|------------|------------|----------|
| 1     | 1      | 61.345  | 199712.7   | 13936421.8 | 49.7168  |
| 2     | 2      | 64.323  | 194160.6   | 14095202.1 | 50.2832  |
| Total |        |         | 393873.3   | 28031623.9 | 100.0000 |

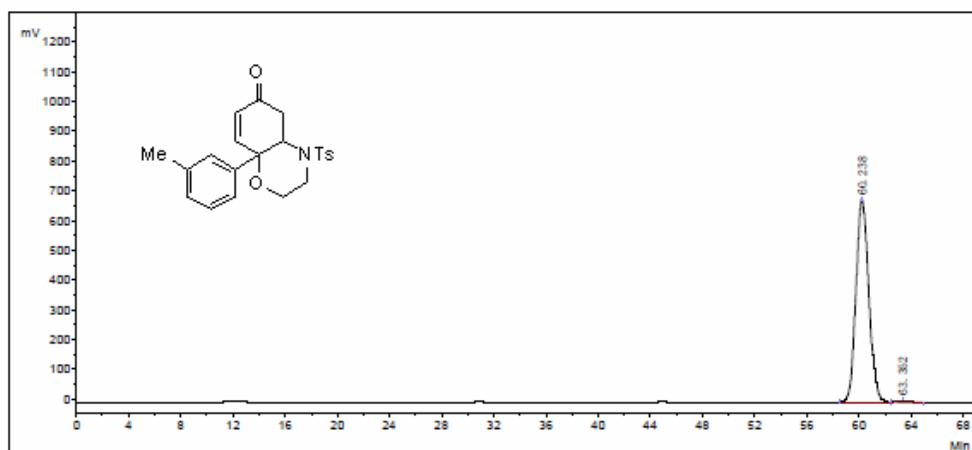

| No.   | PeakNo | R. Time | PeakHeight | PeakArea   | PerCent  |
|-------|--------|---------|------------|------------|----------|
| 1     | 1      | 60.238  | 682952.5   | 46618411.2 | 99.0992  |
| 2     | 2      | 63.352  | 6849.8     | 423776.1   | 0.9008   |
| Total |        |         | 689802.3   | 47042187.3 | 100.0000 |

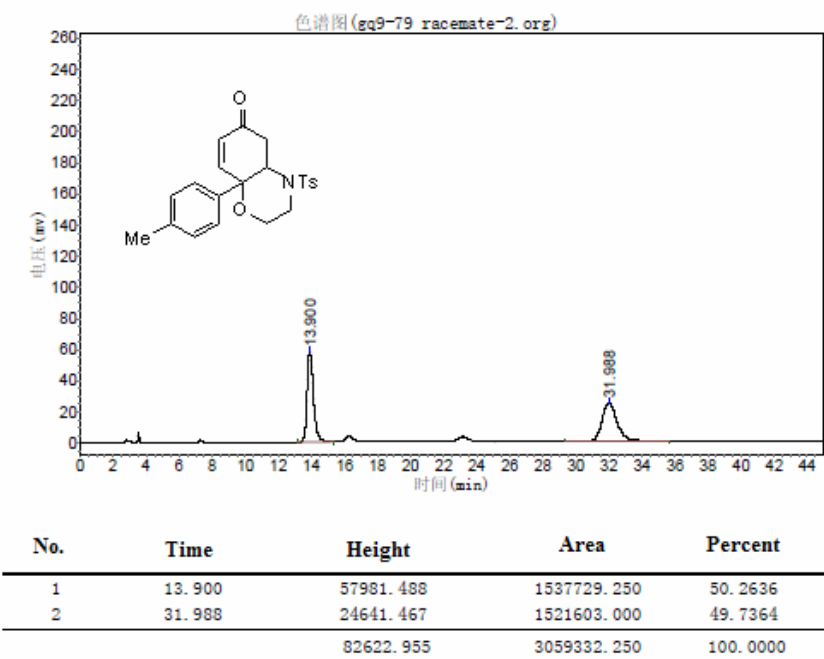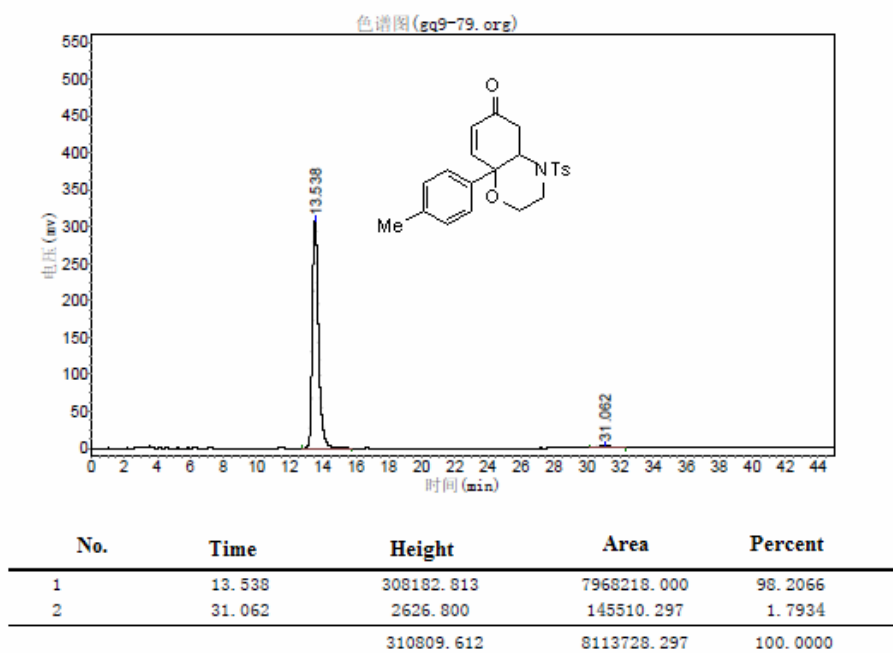

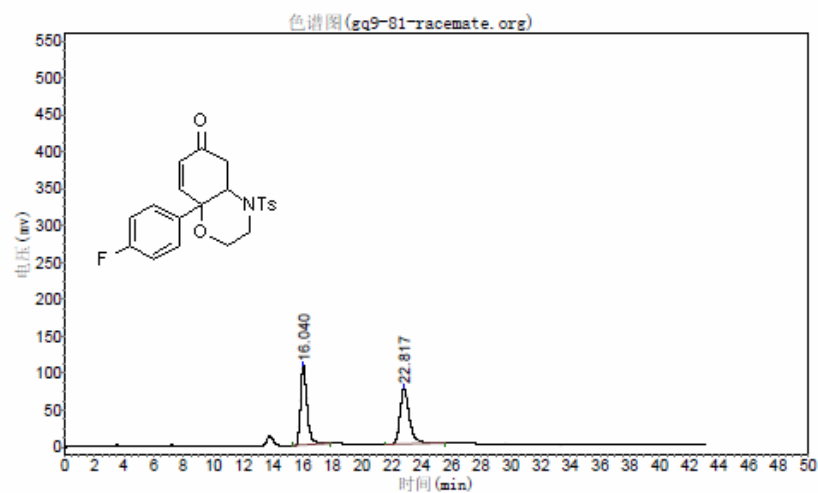

| No. | Time   | Height     | Area        | Percent  |
|-----|--------|------------|-------------|----------|
| 1   | 16.040 | 106726.461 | 3276415.750 | 49.6323  |
| 2   | 22.817 | 75457.977  | 3324961.000 | 50.3677  |
|     |        | 182184.438 | 6601376.750 | 100.0000 |

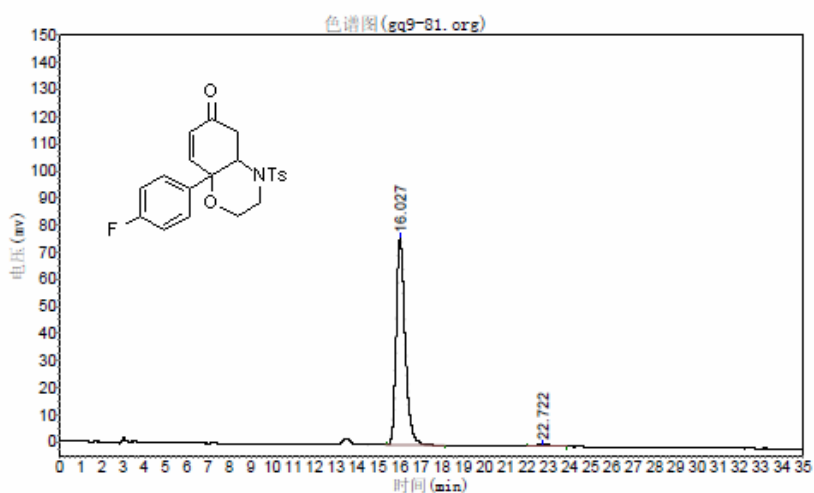

| No. | Time   | Height    | Area        | Percent  |
|-----|--------|-----------|-------------|----------|
| 1   | 16.027 | 76470.711 | 2257515.500 | 98.7592  |
| 2   | 22.722 | 686.356   | 28364.084   | 1.2408   |
|     |        | 77157.067 | 2285879.584 | 100.0000 |

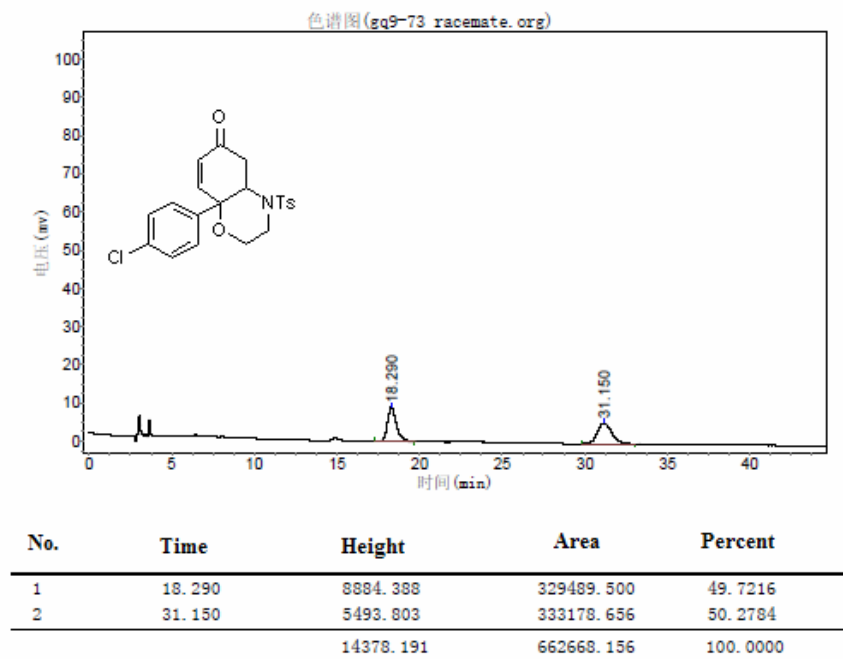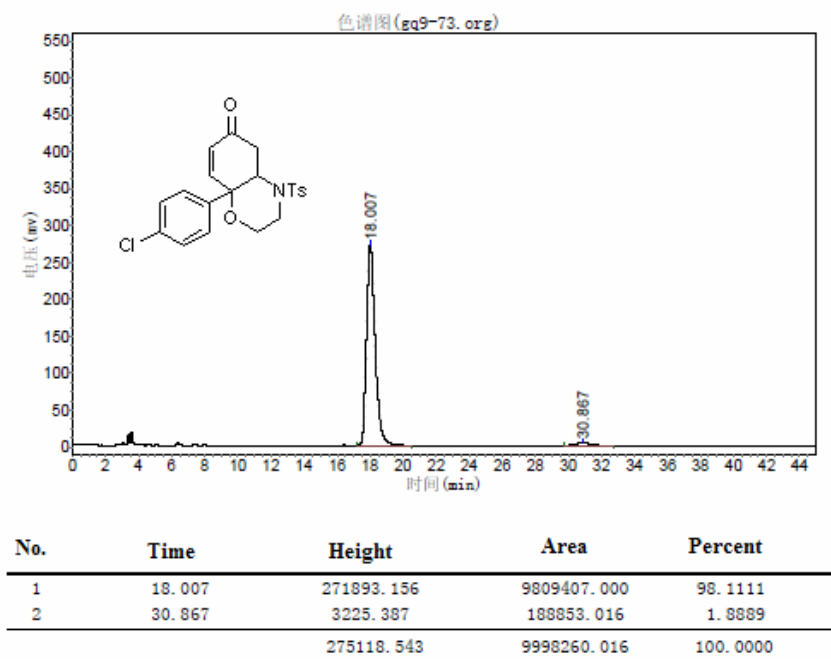

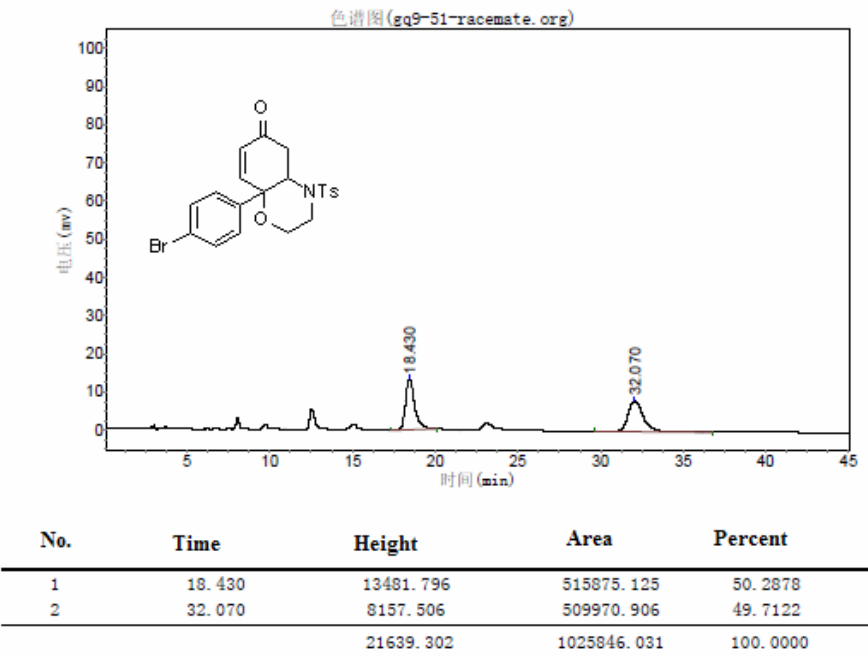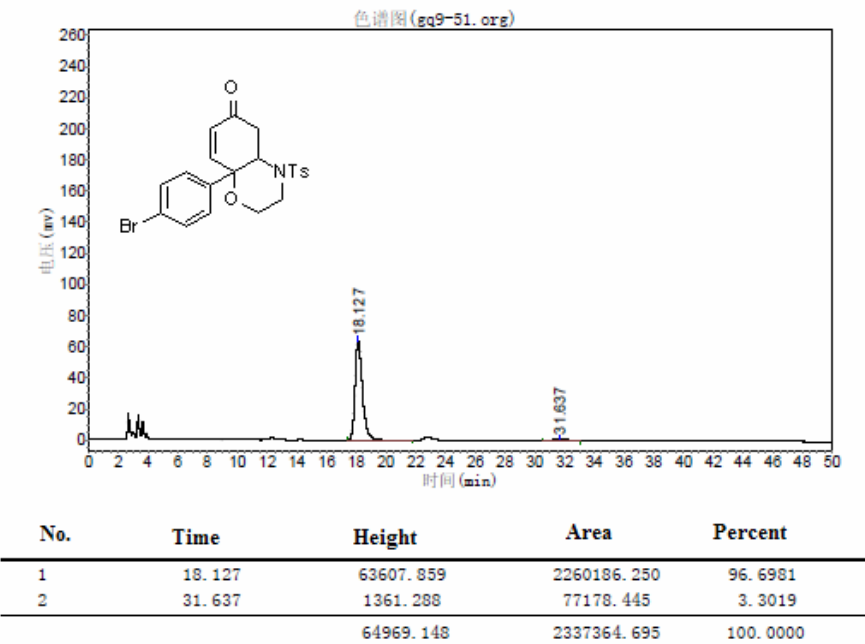

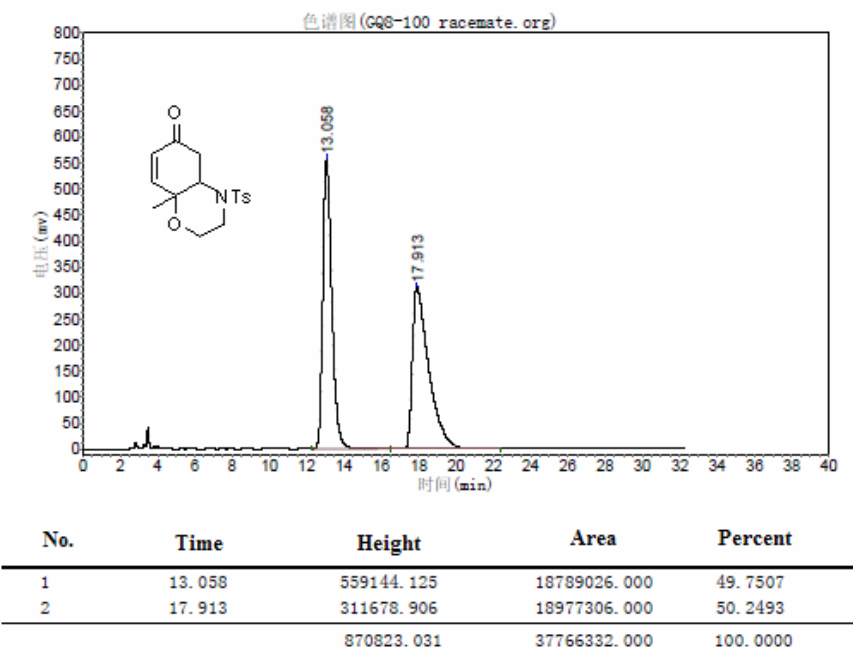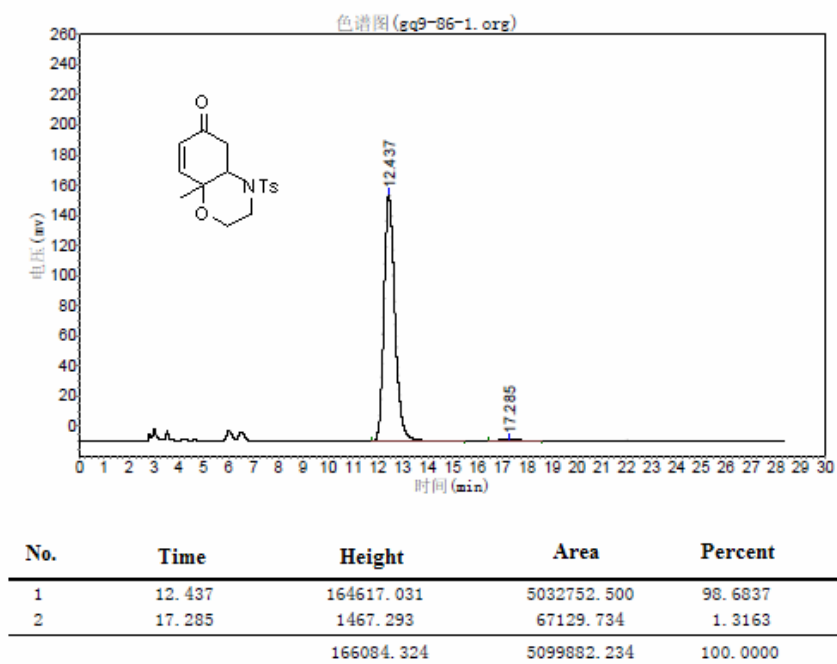

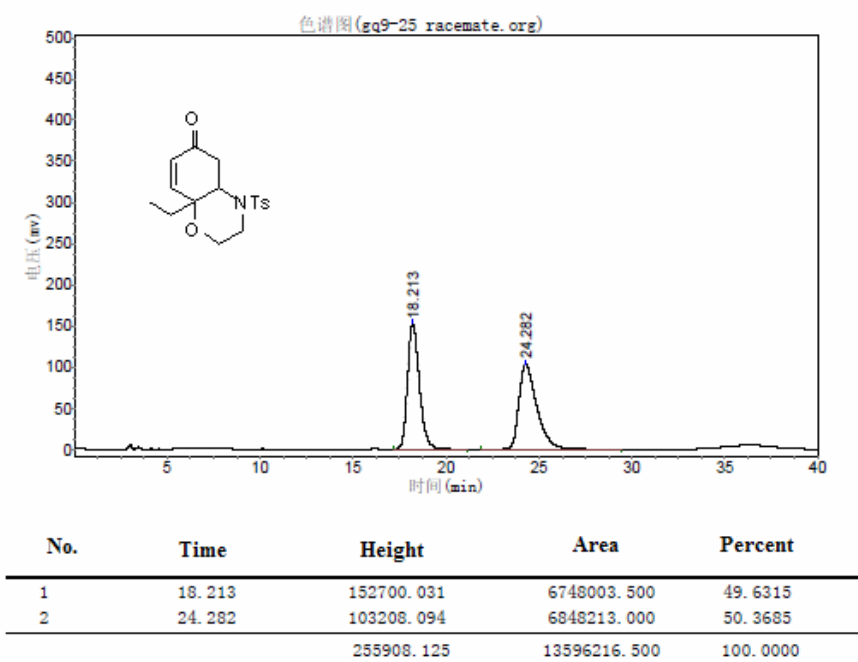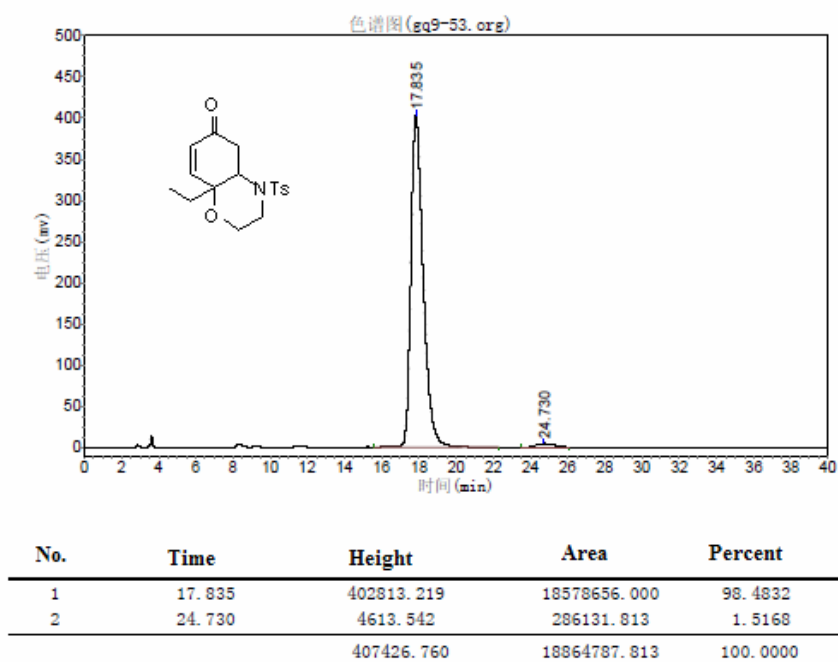

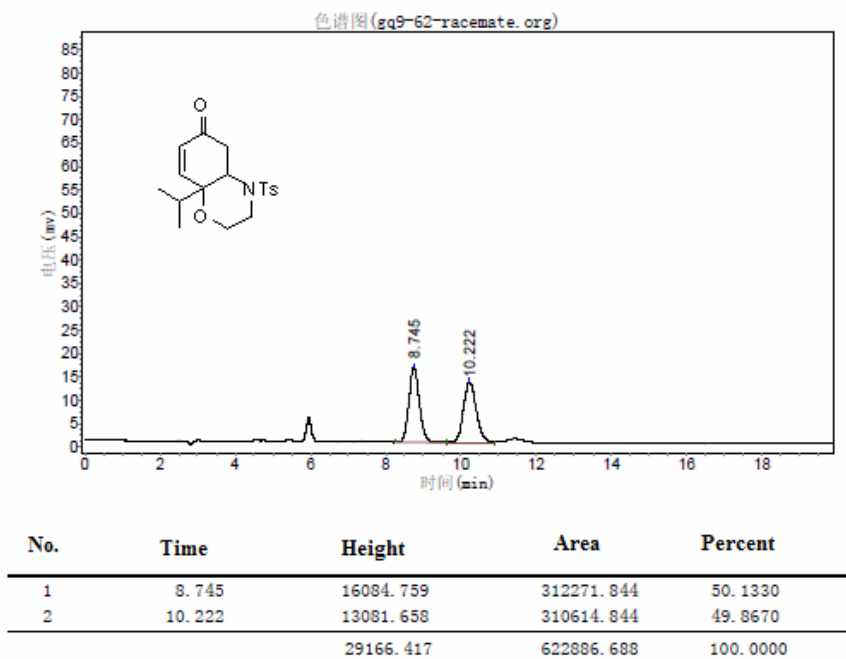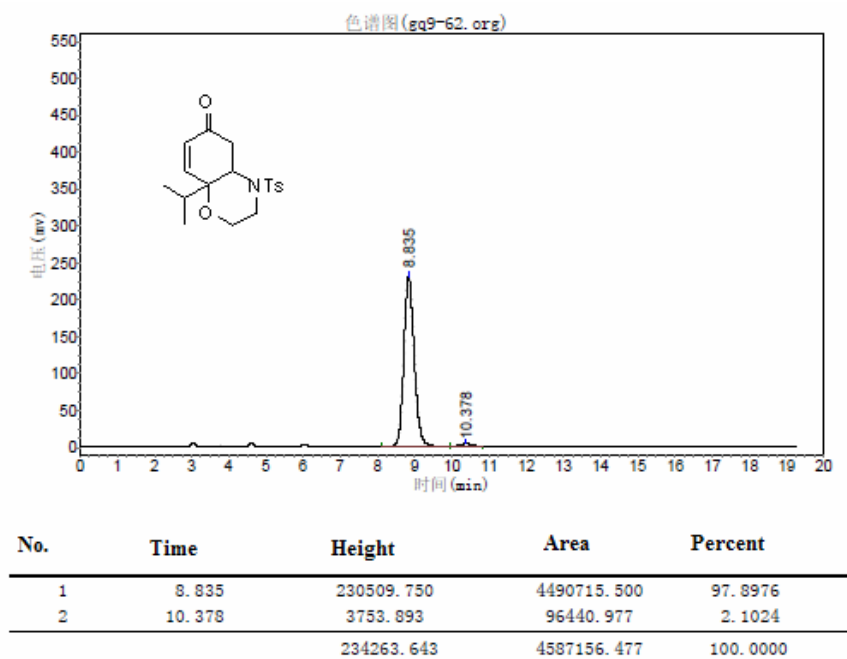



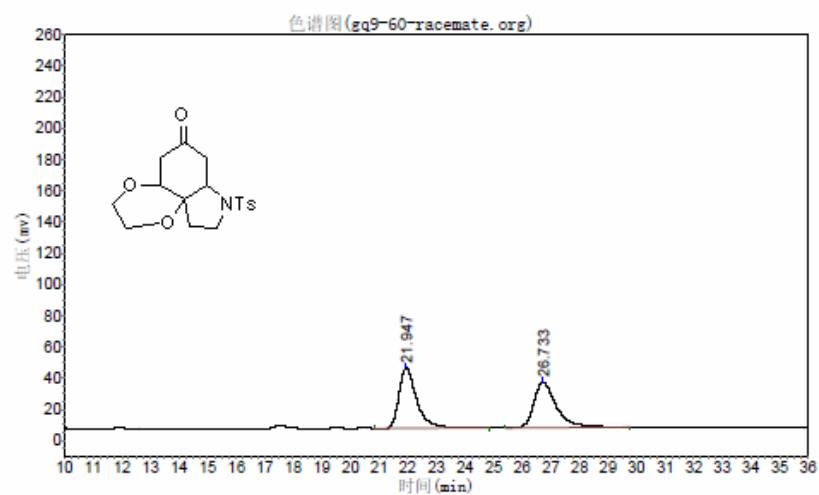

| No. | Time   | Height    | Area        | Percent  |
|-----|--------|-----------|-------------|----------|
| 1   | 21.947 | 38781.219 | 1672596.375 | 51.5169  |
| 2   | 26.733 | 29124.273 | 1574097.375 | 48.4831  |
|     |        | 67905.492 | 3246693.750 | 100.0000 |

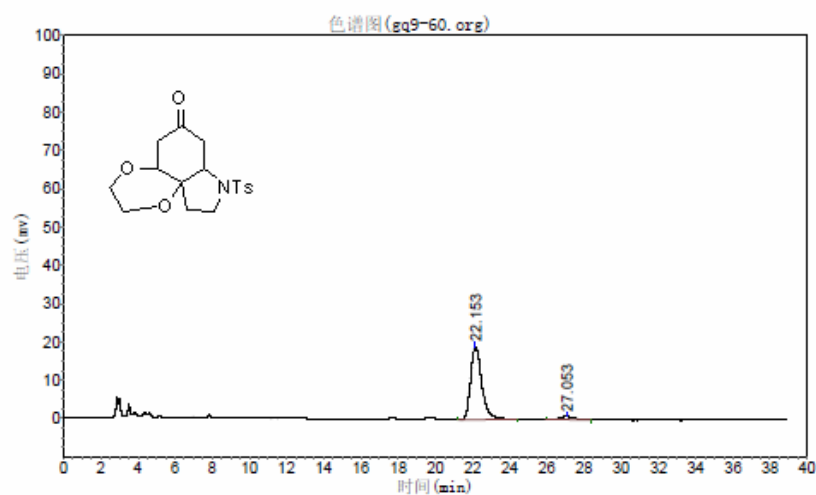

| No. | Time   | Height    | Area       | Percent  |
|-----|--------|-----------|------------|----------|
| 1   | 22.153 | 19101.490 | 797448.375 | 94.6805  |
| 2   | 27.053 | 890.676   | 44803.398  | 5.3195   |
|     |        | 19992.166 | 842251.773 | 100.0000 |

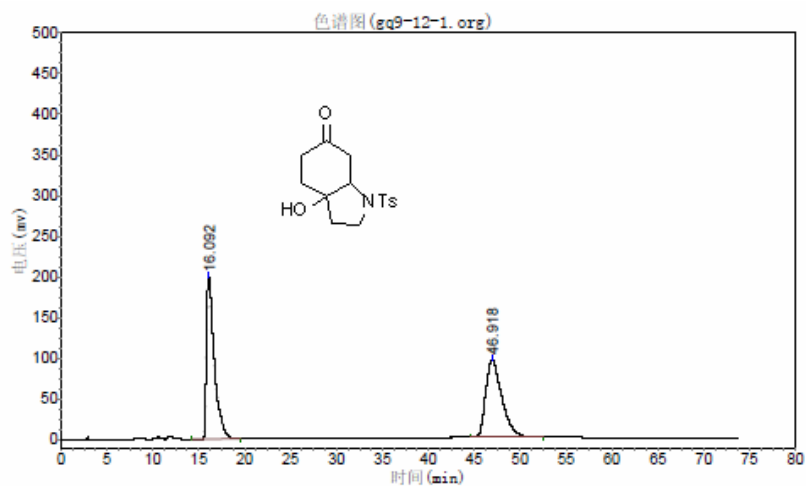

| No. | Time   | Height     | Area         | Percent  |
|-----|--------|------------|--------------|----------|
| 1   | 16.092 | 199566.906 | 11819450.000 | 50.1906  |
| 2   | 46.918 | 95688.086  | 11729691.000 | 49.8094  |
|     |        | 295254.992 | 23549141.000 | 100.0000 |

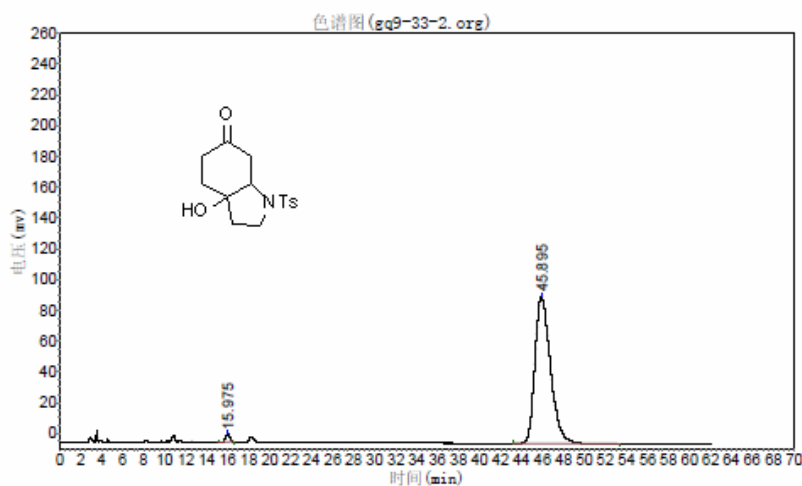

| No. | Time   | Height     | Area        | Percent  |
|-----|--------|------------|-------------|----------|
| 1   | 15.975 | 4854.993   | 139818.344  | 1.4110   |
| 2   | 45.895 | 95482.391  | 9769042.000 | 98.5890  |
|     |        | 100337.383 | 9908860.344 | 100.0000 |

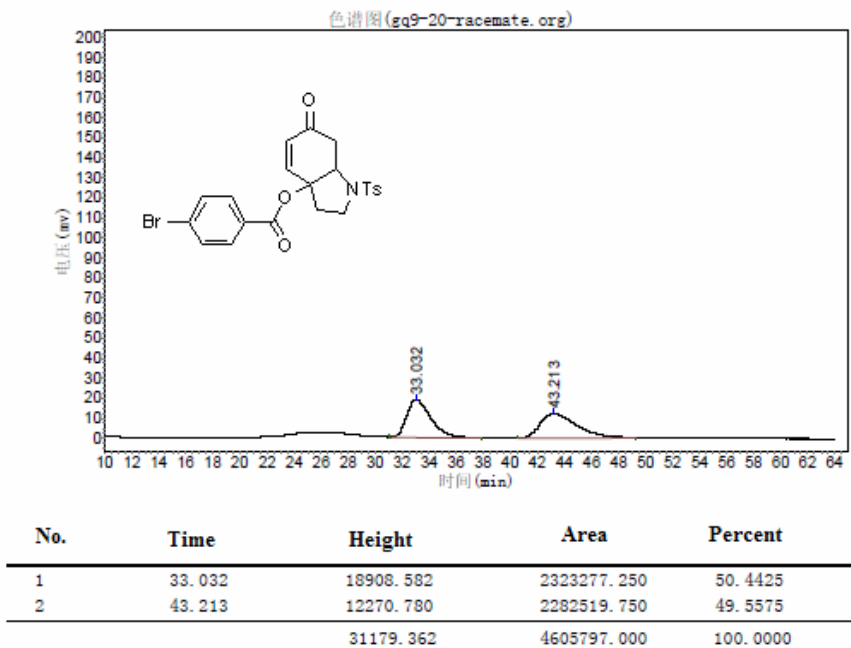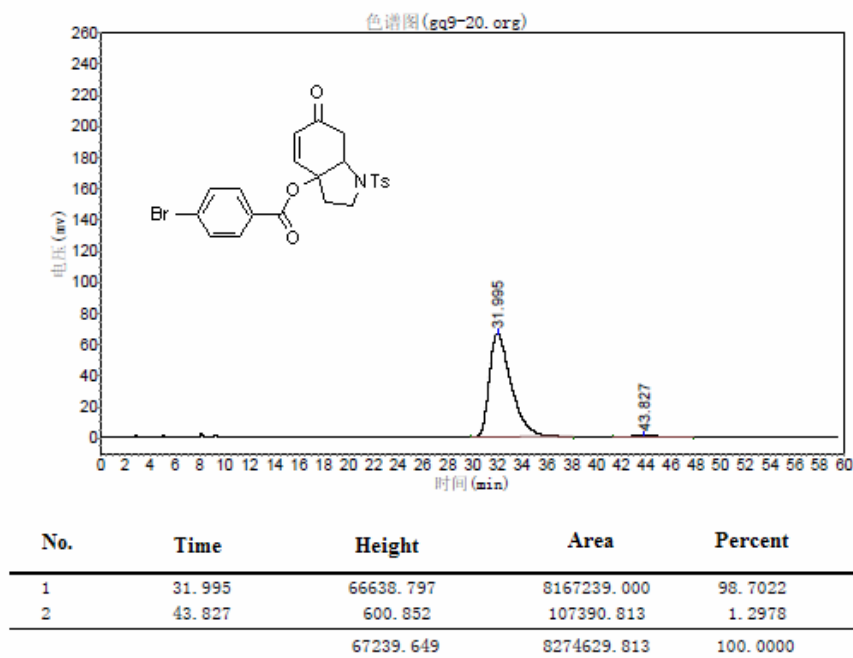

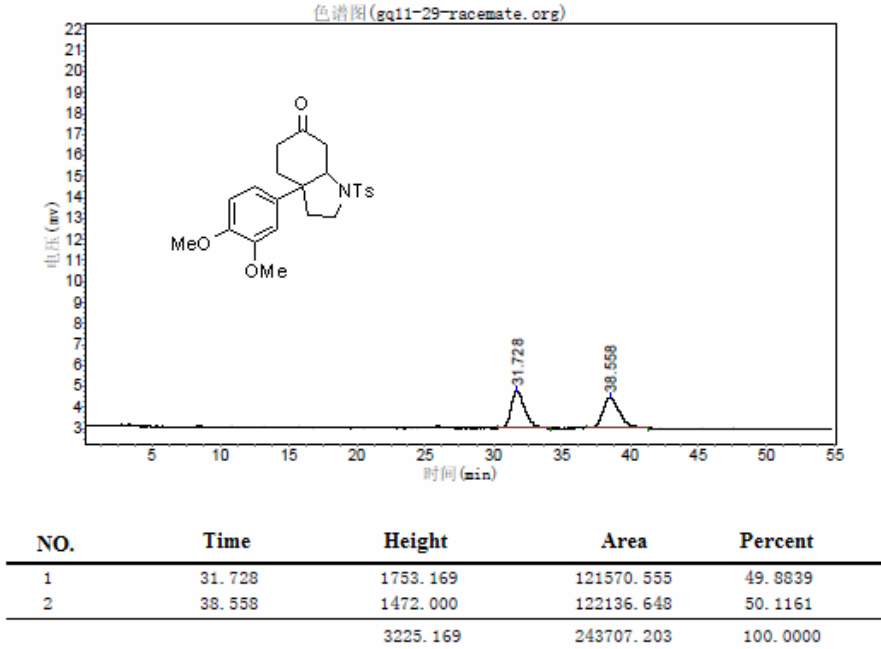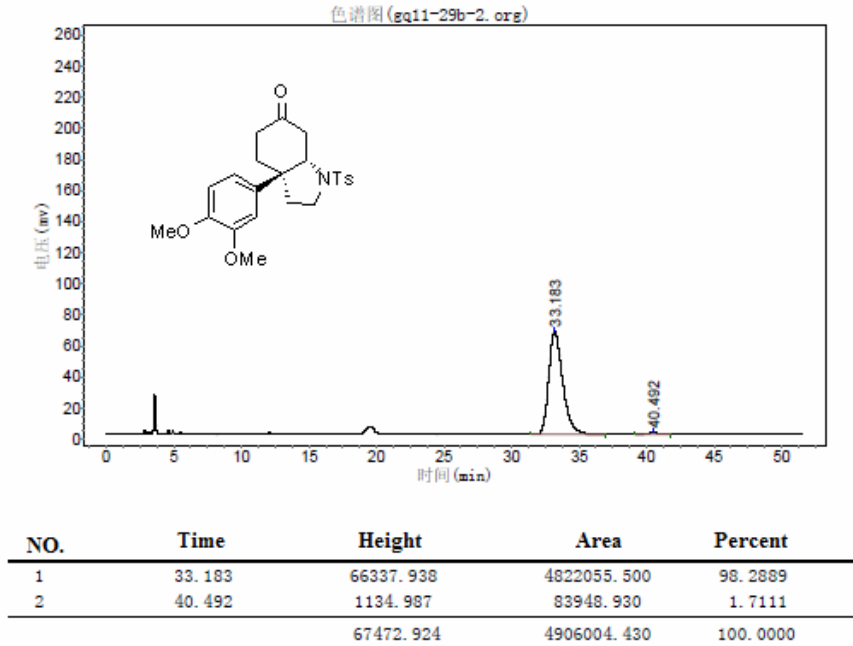

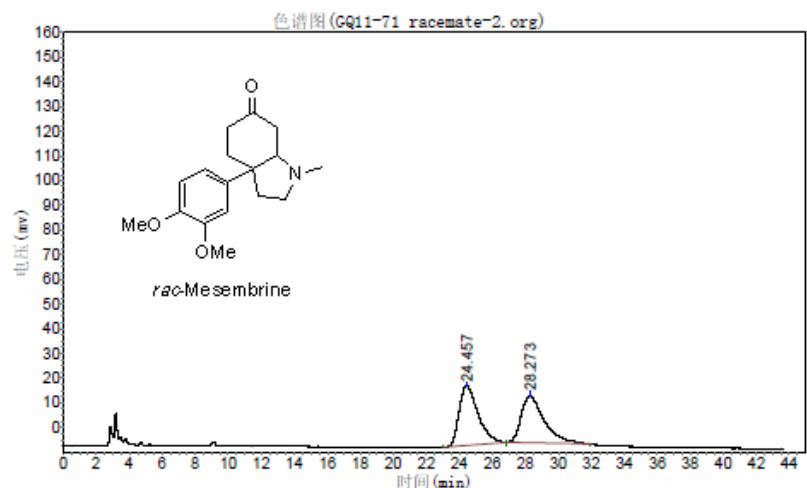

| NO. | Time   | Height    | Area        | Percent  |
|-----|--------|-----------|-------------|----------|
| 1   | 24.457 | 24165.344 | 1944133.750 | 51.0044  |
| 2   | 28.273 | 19083.162 | 1867566.000 | 48.9956  |
|     |        | 43248.506 | 3811699.750 | 100.0000 |

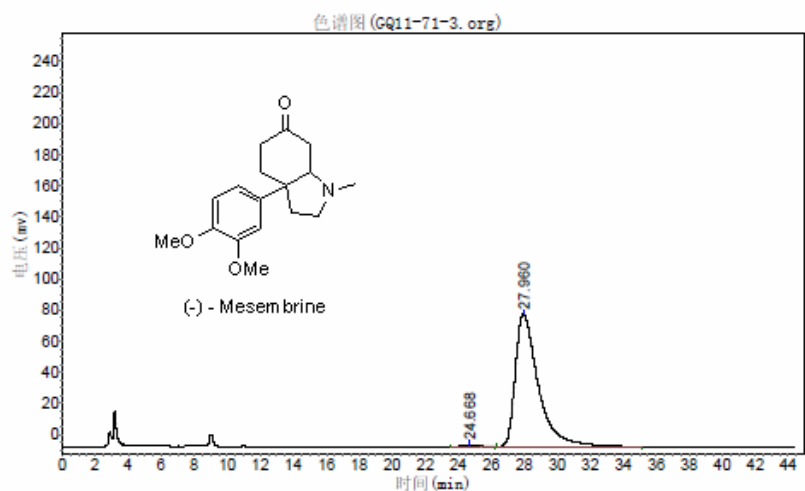

| NO. | Time   | Height    | Area        | Percent  |
|-----|--------|-----------|-------------|----------|
| 1   | 24.668 | 1268.888  | 98431.188   | 1.1708   |
| 2   | 27.960 | 85340.367 | 8308398.500 | 98.8292  |
|     |        | 86609.255 | 8406829.688 | 100.0000 |
